# Supplementary material for: Model Uracil-Rich RNAs and Membrane Protein mRNAs Interact Specifically with Cold Shock Proteins in Escherichia coli
Source: PLoS One. 2015 Jul 30;10(7):e0134413. doi: 10.1371/journal.pone.0134413 (PMC4520561; doi:10.1371/journal.pone.0134413)
Supplement: S5 Table — (XLSX) [file pone.0134413.s008.xlsx]

## Sheet: CspE pull down low Mg
reads_extract	reads_pull down	RPKM extract	RPKM pull down	extract/pull down	from	to	length	bxxx	gene	x_ref	ip_number	uniprot_annotation	p_sort_annotation	integrative_annotation	single gene operon
14	148	22.315	21.4784	0.962507	337	2799	2463	b0002	thrA	16127996	NP_414543.1		Cytoplasmic	CPR	0
31	416	130.441	159.373	1.22181	2801	3733	933	b0003	thrB	16127997	NP_414544.1		Cytoplasmic	CPR	0
42	295	128.116	81.9308	0.639504	3734	5020	1287	b0004	thrC	16127998	NP_414545.1		Cytoplasmic	CPR	0
4	25	52.8734	30.0876	0.56905	5234	5530	297	b0005	yaaX	16127999	NP_414546.1				1
8	136	40.4206	62.5636	1.54782	5683	6459	777	b0006	yaaA	16128000	NP_414547.1		Cytoplasmic	CPR	1
82	1630	224.961	407.148	1.80986	6529	7959	1431	b0007	yaaJ	16128001	NP_414548.1	multipass		MPR	1
402	2310	1654.29	865.501	0.523186	8238	9191	954	b0008	talB	16128002	NP_414549.1		Cytoplasmic	CPR	1
29	332	193.622	201.82	1.04234	9306	9893	588	b0009	mog	16128003	NP_414550.1		Cytoplasmic	CPR	1
9	99	62.3151	62.4103	1.00153	9928	10494	567	b0010	satP	16128004	NP_414551.1	multipass		MPR	1
77	500	157.689	93.2292	0.591221	12163	14079	1917	b0014	dnaK	16128008	NP_414555.1		Cytoplasmic	CPR	0
34	229	118.018	72.373	0.613235	14168	15298	1131	b0015	dnaJ	16128009	NP_414556.1		Cytoplasmic	CPR	0
16	222	299.112	377.866	1.26329	16751	16960	210	b0018	mokC	16128012	NP_414559.1		Secreted		1
79	922	265.76	282.4	1.06261	17489	18655	1167	b0019	nhaA	16128013	NP_414560.1	multipass		MPR	0
12	174	51.998	68.6475	1.3202	18715	19620	906	b0020	nhaR	16128014	NP_414561.1		Cytoplasmic	CPR	0
28	331	416.378	448.155	1.07632	20815	21078	264	b0023	rpsT	16128017	NP_414564.1		Cytoplasmic	CPR	1
13	134	233.041	218.708	0.938495	21181	21399	219	b0024	yaaY	16128018	NP_414565.1				0
47	695	195.876	263.717	1.34635	21407	22348	942	b0025	ribF	16128019	NP_414566.1		Cytoplasmic	CPR	0
143	850	199.289	107.854	0.541194	22391	25207	2817	b0026	ileS	16128020	NP_414567.1		Cytoplasmic	CPR	0
35	212	277.585	153.086	0.551491	25207	25701	495	b0027	lspA	16128021	NP_414568.1	multipass		MPR	0
13	110	113.413	87.3744	0.770406	25826	26275	450	b0028	fkpB	16128022	NP_414569.1		Cytoplasmic	CPR	0
13	161	53.6656	60.5131	1.12759	26277	27227	951	b0029	ispH	16128023	NP_414570.1		Cytoplasmic	CPR	0
35	308	150.169	120.319	0.801222	27293	28207	915	b0030	rihC	16128024	NP_414571.1				1
18	443	85.9675	192.635	2.24079	28374	29195	822	b0031	dapB	16128025	NP_414572.1		Cytoplasmic	CPR	1
5	68	17.0838	21.154	1.23825	29651	30799	1149	b0032	carA	16128026	NP_414573.1		Cytoplasmic	CPR	0
48	340	58.4856	37.7188	0.644923	30817	34038	3222	b0033	carB	16128027	NP_414574.1				0
24	272	237.93	245.515	1.03188	34300	34695	396	b0034	caiF	90111079	NP_414576.4		Cytoplasmic	CPR	1
5	20	12.6314	4.60027	0.364192	36271	37824	1554	b0037	caiC	221800780	NP_414579.4		Cytoplasmic	CPR	0
4	16	12.8928	4.69544	0.364192	37898	39115	1218	b0038	caiB	16128032	NP_414580.1		Cytoplasmic	CPR	1
9	166	30.9122	51.9118	1.67933	39244	40386	1143	b0039	caiA	16128033	NP_414581.1		Cytoplasmic	CPR	0
9	85	18.9655	16.3084	0.859898	47769	49631	1863	b0047	kefC	16128041	NP_414589.1	multipass		MPR	0
6	64	49.0731	47.6588	0.971179	49823	50302	480	b0048	folA	16128042	NP_414590.1		Cytoplasmic	CPR	1
23	155	107.111	65.7216	0.613584	50380	51222	843	b0049	apaH	16128043	NP_414591.1		Cytoplasmic	CPR	0
16	225	166.173	212.762	1.28036	51229	51606	378	b0050	apaG	16128044	NP_414592.1				0
29	511	138.503	222.205	1.60433	51609	52430	822	b0051	rsmA	16128045	NP_414593.1		Cytoplasmic	CPR	0
27	356	107.069	128.534	1.20048	52427	53416	990	b0052	pdxA	16128046	NP_414594.1		Cytoplasmic	CPR	0
90	508	274.535	141.088	0.513915	53416	54702	1287	b0053	surA	16128047	NP_414595.1		Secreted		0
91	977	151.699	148.289	0.977515	54755	57109	2355	b0054	lptD	16128048	NP_414596.1		Secreted		0
34	383	163.577	167.769	1.02563	57364	58179	816	b0055	djlA	16128049	NP_414597.1				1
6	58	40.6824	35.8058	0.880131	58474	59052	579	b4659	N/A	N/A	N/A				1
6	95	35.6895	51.4498	1.44159	59687	60346	660	b0058	rluA	16128052	NP_414600.1		Cytoplasmic	CPR	0
10	91	13.5048	11.1892	0.828537	60358	63264	2907	b0059	hepA	16128053	NP_414601.1		Cytoplasmic	CPR	0
41	521	68.4353	79.178	1.15698	63429	65780	2352	b0060	polB	16128054	NP_414602.1		Cytoplasmic	CPR	1
72	1131	406.122	580.841	1.43021	65855	66550	696	b0061	araD	16128055	NP_414603.1		Cytoplasmic	CPR	1
505	4344	2255.46	1766.46	0.783193	70387	71265	879	b0064	araC	16128058	NP_414606.1		Cytoplasmic	CPR	1
214	3066	1098.21	1432.57	1.30445	71351	72115	765	b0065	yabI	16128059	NP_414607.1	multipass		MPR	1
8	103	44.931	52.6701	1.17224	72229	72927	699	b0066	thiQ	16128060	NP_414608.1				0
6	54	23.9381	19.6156	0.819432	74497	75480	984	b0068	tbpA	16128062	NP_414610.1		Secreted		0
5	71	11.8534	15.3251	1.29288	75644	77299	1656	b0069	sgrR	16128063	NP_414611.1		Cytoplasmic	CPR	0
14	182	46.6174	55.1774	1.18362	77621	78799	1179	b0070	setA	49175994	YP_025293.1	multipass		MPR	1
4	23	14.3804	7.52851	0.523526	80867	81958	1092	b0073	leuB	90111082	NP_414615.4		Cytoplasmic	CPR	0
5	27	12.4868	6.13925	0.491659	81958	83529	1572	b0074	leuA	16128068	NP_414616.1		Cytoplasmic	CPR	0
9	89	20.4827	18.4419	0.900364	85630	87354	1725	b0077	ilvI	90111084	YP_025294.2		Cytoplasmic	CPR	0
137	1452	535.165	516.422	0.964976	88028	89032	1005	b0080	cra	16128073	NP_414622.1		Cytoplasmic	CPR	1
33	333	282.251	259.32	0.918757	89634	90092	459	b0081	mraZ	16128074	NP_414623.1		Cytoplasmic	CPR	0
42	398	175.038	151.021	0.862788	90094	91035	942	b0082	rsmH	16128075	NP_414624.1		Cytoplasmic	CPR	0
13	104	139.443	101.568	0.728384	91032	91397	366	b0083	ftsL	16128076	NP_414625.1		Cytoplasmic	CPR	0
83	1487	184.406	300.8	1.63119	91413	93179	1767	b0084	ftsI	16128077	NP_414626.1				0
94	832	248.004	199.859	0.805872	93166	94653	1488	b0085	murE	16128078	NP_414627.1		Cytoplasmic	CPR	0
57	430	164.66	113.097	0.686853	94650	96008	1359	b0086	murF	16128079	NP_414628.1		Cytoplasmic	CPR	0
92	913	333.498	301.333	0.903552	96002	97084	1083	b0087	mraY	16128080	NP_414629.1	multipass		MPR	0
89	810	265.3	219.838	0.828639	97087	98403	1317	b0088	murD	16128081	NP_414630.1		Cytoplasmic	CPR	0
92	1414	290.103	405.961	1.39937	98403	99647	1245	b0089	ftsW	16128082	NP_414631.1	multipass		MPR	0
73	961	268.34	321.63	1.19859	99644	100711	1068	b0090	murG	16128083	NP_414632.1				0
96	774	255.34	187.438	0.734075	100765	102240	1476	b0091	murC	16128084	NP_414633.1		Cytoplasmic	CPR	0
89	1138	379.371	441.659	1.16419	102233	103153	921	b0092	ddlB	16128085	NP_414634.1		Cytoplasmic	CPR	0
74	1234	349.594	530.784	1.51829	103155	103985	831	b0093	ftsQ	16128086	NP_414635.1				0
114	1411	354.352	399.326	1.12692	103982	105244	1263	b0094	ftsA	16128087	NP_414636.1		Cytoplasmic	CPR	0
274	2163	933.752	671.132	0.718748	105305	106456	1152	b0095	ftsZ	16128088	NP_414637.1				0
250	1505	1069.13	586	0.548109	106557	107474	918	b0096	lpxC	16128089	NP_414638.1		Cytoplasmic	CPR	0
51	359	390.289	250.139	0.640907	107705	108217	513	b0097	secM	90111085	NP_414639.2		Cytoplasmic	CPR	0
208	1648	301.765	217.687	0.72138	108279	110984	2706	b0098	secA	16128091	NP_414640.1				0
4	87	40.2651	79.7368	1.98029	111044	111433	390	b0099	mutT	16128092	NP_414641.1		Cytoplasmic	CPR	0
14	95	277.585	171.499	0.617826	111649	111846	198	b0101	yacG	16128094	NP_414643.1				0
5	170	26.3834	81.6733	3.09563	111856	112599	744	b0102	zapD	16128095	NP_414644.1		Cytoplasmic	CPR	0
6	110	37.9309	63.3148	1.66921	112599	113219	621	b0103	coaE	16128096	NP_414645.1		Cytoplasmic	CPR	0
20	222	75.2078	76.0075	1.01063	113444	114487	1044	b0104	guaC	16128097	NP_414646.1		Cytoplasmic	CPR	1
8	63	22.66	16.2473	0.717003	115714	117099	1386	b0107	hofB	16128100	NP_414649.1		Cytoplasmic	CPR	0
32	274	140.523	109.551	0.779599	117752	118645	894	b0109	nadC	16128102	NP_414651.1		Cytoplasmic	CPR	1
29	546	206.249	353.555	1.71421	118733	119284	552	b0110	ampD	16128103	NP_414652.1		Cytoplasmic	CPR	0
58	850	266.315	355.35	1.33432	119281	120135	855	b0111	ampE	16128104	NP_414653.1	multipass		MPR	0
19	246	54.2876	63.9959	1.17883	120178	121551	1374	b0112	aroP	16128105	NP_414654.1	multipass		MPR	1
8	43	41.0546	20.0914	0.489383	122092	122856	765	b0113	pdhR	16128106	NP_414655.1		Cytoplasmic	CPR	0
131	833	193.05	111.767	0.578954	123017	125680	2664	b0114	aceE	16128107	NP_414656.1		Cytoplasmic	CPR	0
192	1410	398.184	266.239	0.668634	125695	127587	1893	b0115	aceF	16128108	NP_414657.1		Cytoplasmic	CPR	0
262	2355	721.805	590.718	0.81839	127912	129336	1425	b0116	lpd	16128109	NP_414658.1		Cytoplasmic	CPR	1
434	3308	655.819	455.125	0.693979	131615	134212	2598	b0118	acnB	16128111	NP_414660.1		Cytoplasmic	CPR	1
109	2325	1178.84	2289.39	1.94208	134388	134750	363	b0119	yacL	90111086	NP_414661.2				1
33	512	162.96	230.201	1.41262	134788	135582	795	b0120	speD	16128113	NP_414662.1		Cytoplasmic	CPR	0
8	108	36.2247	44.5255	1.22915	135598	136464	867	b0121	speE	16128114	NP_414663.1		Cytoplasmic	CPR	0
6	121	67.687	124.283	1.83613	136570	136917	348	b0122	yacC	90111087	NP_414664.4				0
11	151	27.8429	34.7992	1.24984	137083	138633	1551	b0123	cueO	16128116	NP_414665.1		Secreted		1
18	134	29.5547	20.0322	0.677802	138835	141225	2391	b0124	gcd	16128117	NP_414666.1	multipass		MPR	1
23	359	168.146	238.959	1.42114	141431	141967	537	b0125	hpt	90111088	NP_414667.4		Cytoplasmic	CPR	1
13	221	76.9774	119.147	1.54782	142008	142670	663	b0126	can	16128119	NP_414668.1		Cytoplasmic	CPR	1
11	141	46.585	54.368	1.16707	142779	143705	927	b0127	yadG	16128120	NP_414669.1				0
51	1087	259.686	503.94	1.94057	143702	144472	771	b0128	yadH	16128121	NP_414670.1	multipass		MPR	0
49	537	436.205	435.251	0.997812	144577	145017	441	b0129	yadI	16128122	NP_414671.1		Cytoplasmic	CPR	1
15	265	47.8762	77.0096	1.60851	145081	146310	1230	b0130	yadE	16128123	NP_414672.1				1
7	207	72.1285	194.2	2.69242	146314	146694	381	b0131	panD	16128124	NP_414673.1				1
9	168	39.1281	66.5006	1.69956	146968	147870	903	b0132	yadD	16128125	NP_414674.1		Cytoplasmic	CPR	1
41	543	188.92	227.806	1.20583	147944	148795	852	b0133	panC	16128126	NP_414675.1		Cytoplasmic	CPR	0
40	321	197.527	144.325	0.73066	148807	149601	795	b0134	panB	16128127	NP_414676.1		Cytoplasmic	CPR	0
17	232	47.7392	59.3178	1.24254	157729	159126	1398	b0143	pcnB	162135892	NP_414685.4		Cytoplasmic	CPR	0
7	70	29.645	26.9912	0.91048	159186	160112	927	b0144	gluQ	226524698	NP_414686.3		Cytoplasmic	CPR	0
97	1501	835.104	1176.58	1.4089	160149	160604	456	b0145	dksA	16128138	NP_414687.1		Cytoplasmic	CPR	0
129	1594	718.347	808.171	1.12504	160782	161486	705	b0146	sfsA	16128139	NP_414688.1		Cytoplasmic	CPR	0
28	286	45.2361	42.0692	0.92999	162105	164534	2430	b0148	hrpB	162135893	NP_414690.4				1
33	235	51.1057	33.1355	0.648372	164730	167264	2535	b0149	mrcB	16128142	NP_414691.1				1
13	272	22.7433	43.3261	1.905	167484	169727	2244	b0150	fhuA	16128143	NP_414692.1		Secreted		0
8	60	39.3569	26.8752	0.68286	169778	170575	798	b0151	fhuC	16128144	NP_414693.1				0
14	106	27.7165	19.1068	0.689363	171462	173444	1983	b0153	fhuB	16128146	NP_414695.1	multipass		MPR	0
81	711	248.239	198.392	0.799199	173602	174882	1281	b0154	hemL	16128147	NP_414696.1		Cytoplasmic	CPR	1
31	572	85.5846	143.781	1.67998	175107	176528	1422	b0155	clcA	16128148	NP_414697.1	multipass		MPR	1
13	219	147.931	226.897	1.53381	176610	176954	345	b0156	erpA	16128149	NP_414698.1				1
6	63	37.7485	36.0878	0.956004	177001	177624	624	b0157	yadS	16128150	NP_414699.1	multipass		MPR	0
6	75	29.4071	33.4682	1.1381	177662	178462	801	b0158	btuF	16128151	NP_414700.1		Secreted		0
52	535	292.052	273.578	0.936744	178455	179153	699	b0159	mtn	16128152	NP_414701.1		Cytoplasmic	CPR	1
7	98	18.1034	23.0759	1.27467	179237	180754	1518	b0160	dgt	16128153	NP_414702.1		Cytoplasmic	CPR	1
28	156	77.1395	39.1303	0.507267	180884	182308	1425	b0161	degP	16128154	NP_414703.1		Secreted		1
66	607	223.753	187.363	0.837366	182463	183620	1158	b0162	cdaR	90111093	NP_414704.4		Cytoplasmic	CPR	1
26	526	263.752	485.824	1.84197	183709	184095	387	b0163	yaeH	16128156	NP_414705.1		Cytoplasmic	CPR	1
5	79	24.1442	34.7329	1.43856	184257	185069	813	b0164	yaeI	90111094	NP_414706.2				1
71	736	337.861	318.88	0.943822	185123	185947	825	b0166	dapD	16128159	NP_414708.1		Cytoplasmic	CPR	1
39	367	57.2795	49.0762	0.856785	185978	188650	2673	b0167	glnD	16128160	NP_414709.1				1
59	612	291.352	275.162	0.94443	188712	189506	795	b0168	map	16128161	NP_414710.1				1
102	385	551.566	189.552	0.343662	189874	190599	726	b0169	rpsB	16128162	NP_414711.1		Cytoplasmic	CPR	0
49	240	225.782	100.688	0.445949	190857	191708	852	b0170	tsf	16128163	NP_414712.1		Cytoplasmic	CPR	0
34	182	183.855	89.6063	0.487375	191855	192580	726	b0171	pyrH	16128164	NP_414713.1		Cytoplasmic	CPR	1
77	598	541.739	383.064	0.7071	192872	193429	558	b0172	frr	16128165	NP_414714.1		Cytoplasmic	CPR	1
24	281	78.7138	83.9105	1.06602	193521	194717	1197	b0173	dxr	16128166	NP_414715.1				1
63	890	324.578	417.483	1.28623	194903	195664	762	b0174	ispU	16128167	NP_414716.1		Cytoplasmic	CPR	0
68	713	311.14	297.034	0.954665	195677	196534	858	b0175	cdsA	90111095	NP_414717.2	multipass		MPR	0
130	926	377.206	244.634	0.648542	196546	197898	1353	b0176	rseP	16128169	NP_414718.1	multipass		MPR	0
179	1406	288.831	206.56	0.715159	197928	200360	2433	b0177	bamA	16128170	NP_414719.1		Secreted		0
125	854	1009.73	628.095	0.62204	200482	200967	486	b0178	hlpA	16128171	NP_414720.1		Secreted		0
66	404	252.54	140.747	0.557324	200971	201996	1026	b0179	lpxD	16128172	NP_414721.1		Cytoplasmic	CPR	0
36	441	309.935	345.683	1.11534	202101	202556	456	b0180	fabZ	16128173	NP_414722.1		Cytoplasmic	CPR	1
53	236	263.714	106.915	0.405421	202560	203348	789	b0181	lpxA	16128174	NP_414723.1		Cytoplasmic	CPR	0
20	178	68.335	55.3738	0.810327	203348	204496	1149	b0182	lpxB	16128175	NP_414724.1		Cytoplasmic	CPR	0
14	70	92.0635	41.911	0.45524	204493	205089	597	b0183	rnhB	16128176	NP_414725.1		Cytoplasmic	CPR	0
31	348	34.9415	35.7133	1.02209	205126	208608	3483	b0184	dnaE	16128177	NP_414726.1		Cytoplasmic	CPR	0
24	356	98.1462	132.551	1.35055	208621	209580	960	b0185	accA	16128178	NP_414727.1		Cytoplasmic	CPR	1
40	450	73.3118	75.0926	1.02429	209679	211820	2142	b0186	ldcC	16128179	NP_414728.1		Cytoplasmic	CPR	1
14	131	140.928	120.063	0.851949	211877	212266	390	b0187	yaeR	90111096	NP_414729.4		Cytoplasmic	CPR	1
11	122	33.2443	33.5703	1.00981	212331	213629	1299	b0188	tilS	16128181	NP_414730.1		Cytoplasmic	CPR	1
14	189	215.537	264.927	1.22915	213678	213932	255	b0189	rof	90111097	NP_414731.2		Cytoplasmic	CPR	0
24	256	468.758	455.248	0.971179	213925	214125	201	b4406	yaeP	49176004	YP_026160.1				0
18	169	129.424	110.636	0.85484	214291	214836	546	b0190	yaeQ	16128183	NP_414732.1		Cytoplasmic	CPR	0
4	62	37.1239	52.3908	1.41124	214833	215255	423	b0191	arfB	16128184	NP_414733.1				0
15	207	82.8238	104.065	1.25646	215269	215979	711	b0192	nlpE	16128185	NP_414734.1		Secreted		0
53	457	121.041	95.0264	0.785074	217057	218775	1719	b0194	proS	16128187	NP_414736.1		Cytoplasmic	CPR	1
4	60	22.1799	30.2916	1.36572	218887	219594	708	b0195	yaeB	16128188	NP_414737.1				0
6	100	58.1607	88.257	1.51747	219591	219995	405	b0196	rcsF	16128189	NP_414738.1		Secreted		0
46	467	221.31	204.565	0.924335	220113	220928	816	b0197	metQ	16128190	NP_414739.1				0
16	162	96.0452	88.5404	0.921861	220968	221621	654	b0198	metI	16128191	NP_414740.1	multipass		MPR	0
4	23	15.2165	7.96622	0.523526	221614	222645	1032	b0199	metN	16128192	NP_414741.1				0
55	573	374.864	355.579	0.948555	222833	223408	576	b0200	gmhB	16128193	NP_414742.1		Cytoplasmic	CPR	1
4	64	19.5316	28.453	1.45677	229167	229970	804	b0207	dkgB	16128194	NP_414743.1		Cytoplasmic	CPR	1
9	79	38.6149	30.861	0.799199	229967	230881	915	b0208	yafC	16128195	NP_414744.1		Cytoplasmic	CPR	1
29	539	142.134	240.525	1.69224	231122	231922	801	b0209	yafD	16128196	NP_414745.1				0
9	100	56.6228	57.2822	1.01164	231926	232549	624	b0210	yafE	16128197	NP_414746.1				0
32	149	92.4409	39.1896	0.423942	232597	233955	1359	b0211	mltD	16128198	NP_414747.1				1
4	135	20.7717	63.8287	3.07287	234027	234782	756	b0212	gloB	16128199	NP_414748.1		Cytoplasmic	CPR	1
11	213	59.7294	105.304	1.76302	234816	235538	723	b0213	yafS	90111099	NP_414749.2		Cytoplasmic	CPR	1
15	212	125.828	161.918	1.28681	235535	236002	468	b0214	rnhA	16128201	NP_414750.1		Cytoplasmic	CPR	1
4	38	21.4527	18.5557	0.864956	236067	236798	732	b0215	dnaQ	16128202	NP_414751.1		Cytoplasmic	CPR	1
53	715	269.87	331.479	1.22829	239419	240189	771	b0219	yafV	16128205	NP_414754.1		Cytoplasmic	CPR	1
131	1011	1084.99	762.389	0.702668	240343	240816	474	b0220	ivy	16128206	NP_414755.1		Secreted		1
11	132	17.6623	19.2974	1.09258	240859	243303	2445	b0221	fadE	90111100	NP_414756.2				1
22	162	149.169	100.009	0.670444	243543	244121	579	b0222	lpcA	16128208	NP_414757.1		Cytoplasmic	CPR	1
11	114	56.2296	53.0576	0.943588	244327	245094	768	b0223	yafJ	16128209	NP_414758.1		Cytoplasmic	CPR	1
27	347	143.047	167.385	1.17014	245065	245805	741	b0224	yafK	16128210	NP_414759.1				1
5	42	75.2078	57.5192	0.764803	246242	246502	261	b0226	dinJ	16128212	NP_414761.1				0
12	155	94.5988	111.252	1.17604	247637	248134	498	b0228	rayT	16128214	NP_414763.1				1
7	60	16.0426	12.5198	0.780411	248358	250070	1713	b0229	N/A	N/A	N/A				1
10	163	37.1766	55.1731	1.48408	250898	251953	1056	b0231	dinB	16128217	NP_414766.1		Cytoplasmic	CPR	0
159	1530	428.128	375.092	0.876122	254259	255716	1458	b0237	pepD	16128223	NP_414772.1		Cytoplasmic	CPR	1
6	75	51.3183	58.4053	1.1381	255977	256435	459	b0238	gpt	16128224	NP_414773.1		Cytoplasmic	CPR	0
30	296	94.5988	84.9819	0.89834	256527	257771	1245	b0239	frsA	16128225	NP_414774.1				0
86	2005	839.858	1782.76	2.12269	257829	258230	402	b0240	crl	16128226	NP_414775.1		Cytoplasmic	CPR	1
19	216	67.5644	69.934	1.03507	259612	260715	1104	b0242	proB	16128228	NP_414777.1		Cytoplasmic	CPR	0
25	165	78.2665	47.0317	0.600917	260727	261980	1254	b0243	proA	16128229	NP_414778.1		Cytoplasmic	CPR	0
4	28	45.9164	29.2641	0.637336	262552	262893	342	b0245	ykfI	16128230	NP_414779.1		Cytoplasmic	CPR	0
6	64	51.3183	49.8392	0.971179	263972	264430	459	b0248	yafX	16128233	NP_414782.1				0
13	205	109.051	156.571	1.43576	264844	265311	468	b0250	ykfB	16128235	NP_414784.1				0
5	103	22.719	42.6116	1.87559	267321	268184	864	b0253	ykfA	90111103	NP_414787.4				0
8	130	22.3695	33.0964	1.47953	274549	275952	1404	b0260	mmuP	90111105	NP_414794.4	multipass		MPR	0
25	381	105.194	145.965	1.38757	275939	276871	933	b0261	mmuM	16128246	NP_414795.1		Cytoplasmic	CPR	0
11	62	21.9433	11.2608	0.51318	282425	284392	1968	b0269	yagF	16128254	NP_414803.1		Cytoplasmic	CPR	0
13	98	36.9024	25.3284	0.686362	284619	286001	1383	b0270	yagG	16128255	NP_414804.1	multipass		MPR	0
20	61	48.738	13.5344	0.277696	286013	287623	1611	b0271	yagH	16128256	NP_414805.1				0
21	618	112.627	301.774	2.67941	290724	291455	732	b0276	yagJ	16128261	NP_414810.1				1
4	107	11.2087	27.2992	2.43553	294920	296320	1401	b0281	intF	16128266	NP_414815.1				1
4	32	7.14115	5.2015	0.728384	297960	300158	2199	b0284	paoC	16128269	NP_414818.1				0
12	216	76.6019	125.54	1.63886	302215	302829	615	b0287	yagU	16128272	NP_414821.1	multipass		MPR	1
5	80	11.9399	17.3937	1.45677	304398	306041	1644	b0290	N/A	16128275	NP_414824.1				0
4	44	6.2167	6.2262	1.00153	306031	308556	2526	b0291	N/A	16128276	NP_414825.1		Secreted		0
49	743	267.176	368.859	1.38059	320832	321551	720	b0306	ykgE	16128291	NP_414840.1				0
87	1135	239.18	284.1	1.18781	321562	322989	1428	b0307	ykgF	16128292	NP_414841.1		Cytoplasmic	CPR	0
71	822	400.482	422.15	1.05411	322982	323677	696	b0308	ykgG	90111113	NP_414842.4				0
4	24	10.6608	5.82388	0.546288	326485	327957	1473	b0312	betB	16128297	NP_414846.1		Cytoplasmic	CPR	0
5	18	33.3831	10.9421	0.327773	327971	328558	588	b0313	betI	49176011	NP_414847.3				0
18	343	34.742	60.2764	1.73497	328687	330720	2034	b0314	betT	16128299	NP_414848.1	multipass		MPR	1
11	47	31.2251	12.1473	0.389023	340349	341731	1383	b0324	yahJ	16128309	NP_414858.1				0
5	64	18.6945	21.7869	1.16541	342108	343157	1050	b0325	yahK	16128310	NP_414859.1		Cytoplasmic	CPR	1
5	176	79.7937	255.73	3.20489	344628	344873	246	b0327	yahM	90111114	NP_414861.2				1
12	304	70.1044	161.699	2.30655	344890	345561	672	b0328	yahN	16128313	NP_414862.1	multipass		MPR	1
44	755	625.86	977.782	1.5623	345708	345983	276	b0329	yahO	16128314	NP_414863.1				1
5	69	15.5788	19.5741	1.25646	354146	355405	1260	b0336	codB	16128321	NP_414870.1	multipass		MPR	0
20	222	61.1503	61.8005	1.01063	355395	356678	1284	b0337	codA	16128322	NP_414871.1		Cytoplasmic	CPR	0
16	192	57.9996	63.369	1.09258	365652	366734	1083	b0345	lacI	49176012	NP_414879.3		Cytoplasmic	CPR	0
7	43	32.9508	18.4292	0.559295	366811	367644	834	b0346	mhpR	145698223	NP_414880.2		Cytoplasmic	CPR	0
7	48	31.1575	19.4526	0.624329	370448	371329	882	b0349	mhpC	90111115	NP_414883.4		Cytoplasmic	CPR	0
17	110	82.3944	48.5413	0.589134	371339	372148	810	b0350	mhpD	90111116	NP_414884.2		Cytoplasmic	CPR	0
9	129	37.1531	48.4856	1.30502	372145	373095	951	b0351	mhpF	16128336	NP_414885.1		Cytoplasmic	CPR	0
15	136	58.0747	47.9408	0.825502	373092	374105	1014	b0352	mhpE	16128337	NP_414886.1		Cytoplasmic	CPR	0
12	182	38.8698	53.6751	1.38089	374683	375894	1212	b0353	mhpT	90111117	NP_414887.2	multipass		MPR	1
29	225	210.833	148.934	0.706407	375996	376535	540	b0354	yaiL	90111118	NP_414888.4		Cytoplasmic	CPR	1
19	97	67.1992	31.2358	0.464824	377686	378795	1110	b0356	frmA	16128341	NP_414890.1		Cytoplasmic	CPR	0
6	67	85.3445	86.77	1.0167	378830	379105	276	b0357	frmR	162135894	NP_414891.4		Cytoplasmic	CPR	0
38	430	153.007	157.641	1.03028	387977	388951	975	b0369	hemB	90111123	NP_414903.4		Cytoplasmic	CPR	1
13	182	44.0726	56.1781	1.27467	394354	395511	1158	b0376	ampH	16128361	NP_414910.1		Secreted		1
11	269	35.368	78.7482	2.22654	395863	397083	1221	b0377	sbmA	16128362	NP_414911.1	multipass		MPR	0
19	249	68.1197	81.281	1.19321	397096	398190	1095	b0378	yaiW	16128363	NP_414912.1				0
4	102	50.82	117.99	2.32172	398249	398557	309	b0379	yaiY	16128364	NP_414913.1	multipass		MPR	1
13	385	239.606	646.078	2.69642	398817	399029	213	b0380	yaiZ	90111125	NP_414914.2	multipass		MPR	1
39	540	139.825	176.272	1.26066	399053	400147	1095	b0381	ddlA	16128366	NP_414915.1		Cytoplasmic	CPR	1
23	485	345.956	664.21	1.91993	400610	400870	261	b0382	iraP	16128367	NP_414916.1				1
28	465	77.6298	117.38	1.51205	400971	402386	1416	b0383	phoA	49176017	NP_414917.2		Secreted		0
15	73	183.451	81.2871	0.4431	402505	402825	321	b0384	psiF	162135895	NP_414918.4				0
11	121	53.314	53.3955	1.00153	404059	404868	810	b0386	proC	16128371	NP_414920.1		Cytoplasmic	CPR	1
22	343	188.167	267.107	1.41952	404988	405446	459	b0387	yaiI	90111127	NP_414921.2		Cytoplasmic	CPR	1
16	311	119.645	211.741	1.76975	405629	406153	525	b0388	aroL	16128373	NP_414922.1		Cytoplasmic	CPR	0
6	95	34.742	50.0839	1.44159	406652	407329	678	b0390	aroM	16128375	NP_414924.1		Cytoplasmic	CPR	0
67	2278	922.919	2857.02	3.09563	407401	407685	285	b0391	yaiE	16128376	NP_414925.1				1
32	309	138.204	121.506	0.879182	409368	410276	909	b0394	mak	90111128	NP_414928.2		Cytoplasmic	CPR	1
283	7617	937.566	2297.57	2.45057	410521	411705	1185	b0396	araJ	49176018	NP_414930.3	multipass		MPR	1
6	103	7.48494	11.6989	1.56299	411831	414977	3147	b0397	sbcC	16128382	NP_414931.1		Cytoplasmic	CPR	0
6	76	19.5803	22.5815	1.15327	414974	416176	1203	b0398	sbcD	16128383	NP_414932.1		Cytoplasmic	CPR	0
6	68	34.1378	35.226	1.03188	416366	417055	690	b0399	phoB	16128384	NP_414933.1		Cytoplasmic	CPR	0
10	241	29.7413	65.26	2.19426	418815	420134	1320	b0401	brnQ	16128386	NP_414935.1	multipass		MPR	0
18	189	51.4303	49.1676	0.956004	420210	421583	1374	b0402	proY	16128387	NP_414936.1	multipass		MPR	0
54	526	116.609	103.418	0.886875	421739	423556	1818	b0403	malZ	16128388	NP_414937.1				1
9	118	60.709	72.4708	1.19374	423561	424142	582	b0404	acpH	16128389	NP_414938.1		Cytoplasmic	CPR	1
8	151	29.3247	50.3955	1.71853	424235	425305	1071	b0405	queA	16128390	NP_414939.1		Cytoplasmic	CPR	1
30	438	104.411	138.793	1.3293	425361	426488	1128	b0406	tgt	16128391	NP_414940.1		Cytoplasmic	CPR	0
25	460	294.733	493.762	1.67528	426511	426843	333	b0407	yajC	16128392	NP_414941.1				0
32	238	67.9801	46.034	0.67717	426871	428718	1848	b0408	secD	16128393	NP_414942.1	multipass		MPR	0
58	284	234.258	104.437	0.445821	428729	429700	972	b0409	secF	16128394	NP_414943.1	multipass		MPR	0
5	161	56.4059	165.368	2.93175	429829	430176	348	b0410	yajD	16128395	NP_414944.1				1
46	463	204.055	187	0.916418	430353	431237	885	b0411	tsx	16128396	NP_414945.1		Secreted		1
42	350	366.413	278.009	0.758733	432226	432675	450	b0413	nrdR	16128398	NP_414947.1		Cytoplasmic	CPR	0
71	677	252.478	219.191	0.868162	432679	433782	1104	b0414	ribD	16128399	NP_414948.1		Cytoplasmic	CPR	0
45	263	375.081	199.59	0.532125	433871	434341	471	b0415	ribE	16128400	NP_414949.1		Cytoplasmic	CPR	0
53	738	495.405	628.074	1.2678	434361	434780	420	b0416	nusB	16128401	NP_414950.1		Cytoplasmic	CPR	0
13	156	52.1841	57.0151	1.09258	434858	435835	978	b0417	thiL	16128402	NP_414951.1		Cytoplasmic	CPR	0
73	843	552.191	580.583	1.05142	435813	436331	519	b0418	pgpA	16128403	NP_414952.1	multipass		MPR	0
177	1397	712.693	512.148	0.718611	436385	437359	975	b0419	yajO	90111130	NP_414953.2		Cytoplasmic	CPR	0
38	432	80.0764	82.8848	1.03507	437539	439401	1863	b0420	dxs	16128405	NP_414954.1		Cytoplasmic	CPR	0
23	280	100.327	111.204	1.10841	439426	440325	900	b0421	ispA	16128406	NP_414955.1		Cytoplasmic	CPR	0
21	271	339.271	398.627	1.17495	440325	440567	243	b0422	xseB	16128407	NP_414956.1		Cytoplasmic	CPR	0
19	203	51.4777	50.0762	0.972776	440773	442221	1449	b0423	thiI	16128408	NP_414957.1		Cytoplasmic	CPR	1
13	89	86.3554	53.8278	0.623329	442275	442865	591	b0424	yajL	90111131	NP_414958.4		Cytoplasmic	CPR	0
26	221	111.921	86.6167	0.773908	442828	443739	912	b0425	panE	16128410	NP_414959.1		Cytoplasmic	CPR	0
68	645	542.597	468.596	0.863617	443907	444398	492	b0426	yajQ	90111132	NP_414960.2		Cytoplasmic	CPR	1
7	112	20.1326	29.3285	1.45677	444526	445890	1365	b0427	yajR	90111133	NP_414961.4	multipass		MPR	1
82	719	361.301	288.44	0.798336	446039	446929	891	b0428	cyoE	16128413	NP_414962.1	multipass		MPR	0
28	268	333.102	290.285	0.871459	446941	447270	330	b0429	cyoD	16128414	NP_414963.1	multipass		MPR	0
16	113	102.136	65.6761	0.643027	447270	447884	615	b0430	cyoC	16128415	NP_414964.1	multipass		MPR	0
92	713	181.314	127.939	0.705622	447874	449865	1992	b0431	cyoB	16128416	NP_414965.1	multipass		MPR	0
100	448	414.119	168.917	0.407895	449887	450834	948	b0432	cyoA	16128417	NP_414966.1	multipass		MPR	0
16	252	42.5566	61.0265	1.43401	451294	452769	1476	b0433	ampG	16128418	NP_414967.1	multipass		MPR	1
7	148	47.4628	91.3665	1.92501	452813	453391	579	b0434	yajG	90111134	NP_414968.4				1
138	2936	1703.67	3300.14	1.93708	453696	454013	318	b0435	bolA	90111135	NP_414969.4				1
80	630	241.777	173.355	0.717003	454357	455655	1299	b0436	tig	16128421	NP_414970.1		Cytoplasmic	CPR	1
83	839	522.188	480.597	0.920353	455901	456524	624	b0437	clpP	16128422	NP_414971.1		Cytoplasmic	CPR	0
261	1890	803.644	529.853	0.659313	456650	457924	1275	b0438	clpX	16128423	NP_414972.1		Cytoplasmic	CPR	0
86	309	143.364	46.8999	0.327138	458112	460466	2355	b0439	lon	16128424	NP_414973.1		Cytoplasmic	CPR	1
518	4171	7449.05	5461.12	0.73313	460675	460947	273	b0440	hupB	16128425	NP_414974.1		Cytoplasmic	CPR	1
55	457	115.343	87.2598	0.756526	461139	463010	1872	b0441	ppiD	16128426	NP_414975.1				1
8	101	84.4269	97.0471	1.14948	463161	463532	372	b0442	ybaV	16128427	NP_414976.1				1
4	90	39.3569	80.6257	2.04858	463626	464024	399	b0443	fadM	16128428	NP_414977.1		Cytoplasmic	CPR	1
15	213	84.6088	109.389	1.29288	464076	464771	696	b0444	queC	16128429	NP_414978.1		Cytoplasmic	CPR	1
22	158	50.7752	33.2014	0.65389	464836	466536	1701	b0445	ybaE	16128430	NP_414979.1				1
18	175	86.2824	76.3762	0.885189	466636	467454	819	b0446	cof	90111136	NP_414980.2		Cytoplasmic	CPR	1
10	100	85.5305	77.8738	0.91048	467607	468065	459	b0447	ybaO	90111137	NP_414981.4		Cytoplasmic	CPR	1
4	255	8.85696	51.4086	5.80431	468095	469867	1773	b0448	mdlA	16128433	NP_414982.1	multipass		MPR	0
18	157	39.655	31.4917	0.794141	469860	471641	1782	b0449	mdlB	16128434	NP_414983.1	multipass		MPR	0
12	221	36.6046	61.3787	1.6768	472190	473476	1287	b0451	amtB	16128436	NP_414985.1	multipass		MPR	0
25	385	113.991	159.831	1.40214	473525	474385	861	b0452	tesB	16128437	NP_414986.1		Cytoplasmic	CPR	1
24	172	164.433	107.295	0.652511	474603	475175	573	b0453	ybaY	49176025	NP_414987.3		Secreted		1
7	125	70.4639	114.564	1.62586	475206	475595	390	b0454	atl	16128439	NP_414988.1				1
315	5	10847.7	15.6772	0.00144521	475672	475785	114	b0455	ffs	N/A	N/A				1
5	75	55.4498	75.729	1.36572	475896	476249	354	b0456	ybaA	16128440	NP_414989.1				1
11	158	27.8429	36.4124	1.30778	476291	477841	1551	b0457	ylaB	90111138	NP_414990.2	multipass		MPR	1
7	193	58.3459	146.467	2.51032	478005	478475	471	b0458	ylaC	90111139	NP_414991.4	multipass		MPR	1
4	36	71.705	58.7574	0.819432	479314	479532	219	b0460	hha	16128444	NP_414993.1				0
98	844	122.138	95.7714	0.784128	480478	483627	3150	b0462	acrB	16128446	NP_414995.1	multipass		MPR	0
29	259	95.3514	77.5353	0.813153	483650	484843	1194	b0463	acrA	16128447	NP_414996.1				0
4	66	24.2336	36.406	1.50229	484985	485632	648	b0464	acrR	16128448	NP_414997.1		Cytoplasmic	CPR	1
24	213	28.0168	22.639	0.808051	485760	489122	3363	b0465	mscK	16128449	NP_414998.1	multipass		MPR	1
13	97	96.6592	65.6662	0.679358	489509	490036	528	b0467	priC	16128451	NP_415000.1		Cytoplasmic	CPR	0
8	52	56.8964	33.6719	0.591812	490636	491187	552	b0469	apt	16128453	NP_415002.1		Cytoplasmic	CPR	1
41	309	83.3125	57.1683	0.686191	491316	493247	1932	b0470	dnaX	16128454	NP_415003.1		Cytoplasmic	CPR	1
16	122	190.344	132.145	0.694241	493300	493629	330	b0471	ybaB	16128455	NP_415004.1				0
15	105	97.1745	61.9328	0.637336	493629	494234	606	b0472	recR	16128456	NP_415005.1		Cytoplasmic	CPR	0
20	222	41.8757	42.321	1.01063	494344	496218	1875	b0473	htpG	16128457	NP_415006.1		Cytoplasmic	CPR	1
44	566	267.81	313.661	1.17121	496399	497043	645	b0474	adk	16128458	NP_415007.1		Cytoplasmic	CPR	1
24	260	98.1462	96.8069	0.986353	498238	499197	960	b0476	aes	16128460	NP_415009.1		Cytoplasmic	CPR	1
13	166	39.1081	45.4676	1.16261	499349	500653	1305	b0477	gsk	16128461	NP_415010.1		Cytoplasmic	CPR	1
46	568	107.686	121.065	1.12424	500786	502462	1677	b0478	ybaL	16128462	NP_415011.1	multipass		MPR	1
8	97	25.7222	28.3962	1.10396	502700	503920	1221	b0479	fsr	16128463	NP_415012.1	multipass		MPR	1
142	1083	337.248	234.185	0.694401	504138	505790	1653	b0480	ushA	16128464	NP_415013.1		Secreted		1
7	134	57.252	99.7855	1.74292	505827	506306	480	b0481	ybaK	16128465	NP_415014.1		Cytoplasmic	CPR	1
13	123	64.1963	55.3021	0.861454	506510	507304	795	b0482	ybaP	16128466	NP_415015.1		Cytoplasmic	CPR	1
199	1701	311.874	242.717	0.778255	508099	510603	2505	b0484	copA	16128468	NP_415017.1	multipass		MPR	1
49	362	206.181	138.685	0.67264	510865	511797	933	b0485	ybaS	16128469	NP_415018.1		Cytoplasmic	CPR	0
42	645	127.522	178.306	1.39824	511800	513092	1293	b0486	ybaT	16128470	NP_415019.1	multipass		MPR	0
29	323	279.043	282.974	1.01409	513217	513624	408	b0487	cueR	16128471	NP_415020.1		Cytoplasmic	CPR	1
15	353	128.296	274.894	2.14266	513625	514083	459	b0488	ybbJ	145698226	NP_415021.2	multipass		MPR	0
22	171	94.0835	66.5821	0.707691	514080	514997	918	b0489	qmcA	16128473	NP_415022.1				0
9	69	52.113	36.3767	0.698035	515143	515820	678	b0490	ybbL	16128474	NP_415023.1				0
4	100	20.1326	45.8257	2.2762	515807	516586	780	b0491	ybbM	90111141	NP_415024.4				0
20	152	91.8327	63.545	0.691965	516649	517503	855	b0492	ybbN	90111142	NP_415025.4		Cytoplasmic	CPR	1
10	131	48.4673	57.8083	1.19273	517564	518373	810	b0493	ybbO	16128477	NP_415026.1		Cytoplasmic	CPR	0
9	128	56.3519	72.9703	1.2949	518363	518989	627	b0494	tesA	16128478	NP_415027.1		Secreted		0
18	175	102.861	91.0511	0.885189	518957	519643	687	b0495	ybbA	16128479	NP_415028.1				0
18	302	29.261	44.6986	1.52758	519640	522054	2415	b0496	ybbP	16128480	NP_415029.1	multipass		MPR	0
7	48	6.41928	4.00774	0.624329	522485	526765	4281	b0497	rhsD	16128481	NP_415030.1		Secreted		0
15	156	53.7787	50.9231	0.946899	529356	530450	1095	b0503	ybbB	16128487	NP_415036.1		Cytoplasmic	CPR	1
64	1408	307.91	616.76	2.00306	532235	533050	816	b0506	allR	16128490	NP_415039.1		Cytoplasmic	CPR	1
10	43	36.7589	14.3913	0.391506	550750	551817	1068	b0522	purK	16128506	NP_415055.1				0
20	143	158.62	103.261	0.650993	553166	553660	495	b0525	ppiB	16128509	NP_415058.1		Cytoplasmic	CPR	0
15	71	42.4875	18.3105	0.430961	553834	555219	1386	b0526	cysS	16128510	NP_415059.1		Cytoplasmic	CPR	1
4	50	30.0831	34.2376	1.1381	555255	555776	522	b0527	ybcI	16128511	NP_415060.1	multipass		MPR	1
11	59	202.743	99.0094	0.488348	555884	556096	213	b0528	ybcJ	90111146	NP_415061.2				0
73	501	330.55	206.549	0.624864	556098	556964	867	b0529	folD	16128513	NP_415062.1		Cytoplasmic	CPR	0
5	82	58.9467	88.0184	1.49319	567538	567870	333	b0543	emrE	16128526	NP_415075.1	multipass		MPR	1
10	203	52.3446	96.7473	1.84827	582904	583653	750	b0564	appY	16128547	NP_415096.1		Cytoplasmic	CPR	1
111	1481	456.781	554.895	1.21479	583903	584856	954	b0565	ompT	16128548	NP_415097.1		Secreted		1
23	181	4.23878	3.03712	0.716508	564025	585326	21302	N/A	N/A	N/A	N/A				1
4	75	5.282	9.01717	1.70715	587205	590177	2973	b0568	nfrA	16128551	NP_415100.1		Secreted		0
6	105	10.5251	16.77	1.59334	590164	592401	2238	b0569	nfrB	16128552	NP_415101.1	multipass		MPR	0
10	85	57.3954	44.4188	0.773908	593983	594666	684	b0571	cusR	16128554	NP_415103.1		Cytoplasmic	CPR	0
5	55	6.2434	6.25294	1.00153	597937	601080	3144	b0575	cusA	16128558	NP_415107.1	multipass		MPR	0
5	64	14.2551	16.6131	1.16541	601182	602558	1377	b0576	pheP	16128559	NP_415108.1	multipass		MPR	1
5	80	15.7286	22.9129	1.45677	602639	603886	1248	b0577	ybdG	16128560	NP_415109.1	multipass		MPR	1
46	554	276.13	302.786	1.09653	603994	604647	654	b0578	nfsB	16128561	NP_415110.1				1
6	110	63.8349	106.554	1.66921	604741	605109	369	b0579	ybdF	16128562	NP_415111.1				1
6	181	94.5988	259.826	2.74661	605174	605422	249	b0580	ybdJ	16128563	NP_415112.1	multipass		MPR	1
43	492	150.859	157.159	1.04176	605488	606606	1119	b0581	ybdK	16128564	NP_415113.1		Cytoplasmic	CPR	1
5	67	8.75914	10.6865	1.22004	609477	611717	2241	b0584	fepA	16128567	NP_415116.1	multipass	Secreted	MPR	0
5	70	5.05648	6.44535	1.27467	613380	617261	3882	b0586	entF	16128569	NP_415118.1		Cytoplasmic	CPR	0
128	1615	238.608	274.106	1.14877	629117	631222	2106	b0598	cstA	16128581	NP_415130.1	multipass		MPR	1
6	96	118.965	173.305	1.45677	631405	631602	198	b4512	ybdD	94541100	YP_588442.1				1
14	317	50.47	104.048	2.06159	631612	632700	1089	b0599	ybdH	16128582	NP_415132.1				1
103	501	716.955	317.514	0.442865	638168	638731	564	b0605	ahpC	16128588	NP_415138.1		Cytoplasmic	CPR	0
78	719	195.54	164.112	0.839276	638976	640541	1566	b0606	ahpF	90111152	NP_415139.2				0
119	2189	1088.99	1823.86	1.67482	640662	641090	429	b0607	uspG	16128590	NP_415140.1		Cytoplasmic	CPR	1
8	130	25.3485	37.5039	1.47953	641311	642549	1239	b0608	ybdR	16128591	NP_415141.1		Cytoplasmic	CPR	1
8	60	76.4155	52.1811	0.68286	642780	643190	411	b0610	rnk	16128593	NP_415143.1		Cytoplasmic	CPR	1
15	121	72.9712	53.594	0.734454	643420	644226	807	b0611	rna	16128594	NP_415144.1		Secreted		1
4	28	10.7264	6.8363	0.637336	644340	645803	1464	b0612	citT	16128595	NP_415145.1	multipass		MPR	1
6	41	15.3654	9.55973	0.622161	647262	648794	1533	b0615	citF	16128598	NP_415148.1		Cytoplasmic	CPR	0
4	23	17.2755	9.04415	0.523526	648805	649713	909	b0616	citE	90111153	NP_415149.4		Cytoplasmic	CPR	0
10	275	23.6639	59.2503	2.50382	651458	653116	1659	b0619	dpiB	16128602	NP_415152.1	multipass		MPR	0
22	615	126.826	322.799	2.54521	653085	653765	681	b0620	dpiA	16128603	NP_415153.1		Cytoplasmic	CPR	0
286	5268	810.096	1358.58	1.67707	653806	655191	1386	b0621	dcuC	16128604	NP_415154.1	multipass		MPR	1
6	123	41.9877	78.3693	1.86648	655780	656340	561	b0622	pagP	16128605	NP_415155.1		Secreted		1
657	29333	12282.3	49927.7	4.06501	656515	656724	210	b0623	cspE	16128606	NP_415156.1		Cytoplasmic	csp	1
6	174	61.3414	161.965	2.64039	656778	657161	384	b0624	crcB	16128607	NP_415157.1	multipass		MPR	1
14	363	269.421	636.034	2.36074	658170	658373	204	b0627	tatE	16128610	NP_415160.1				1
49	391	199.137	144.678	0.726526	658474	659439	966	b0628	lipA	16128611	NP_415161.1		Cytoplasmic	CPR	1
5	59	16.1957	17.4002	1.07437	661975	663186	1212	b0632	dacA	16128615	NP_415165.1				1
20	232	72.1001	76.149	1.05616	663325	664413	1089	b0633	rlpA	16128616	NP_415166.1				0
13	156	45.8545	50.0995	1.09258	664424	665536	1113	b0634	mrdB	16128617	NP_415167.1	multipass		MPR	0
8	92	16.5125	17.2895	1.04705	665539	667440	1902	b0635	mrdA	16128618	NP_415168.1				0
11	104	92.2742	79.4313	0.860818	667471	667938	468	b0636	rlmH	16128619	NP_415169.1				0
14	125	172.836	140.503	0.812929	667942	668259	318	b0637	rsfS	90111157	NP_415170.4		Cytoplasmic	CPR	0
4	80	24.4601	44.5409	1.82096	669154	669795	642	b0639	nadD	16128622	NP_415172.1		Cytoplasmic	CPR	0
9	151	34.2371	52.2999	1.52758	669797	670828	1032	b0640	holA	16128623	NP_415173.1				0
22	99	148.4	60.8018	0.409716	670828	671409	582	b0641	lptE	16128624	NP_415174.1		Secreted		0
100	662	151.988	91.6089	0.602738	671424	674006	2583	b0642	leuS	16128625	NP_415175.1		Cytoplasmic	CPR	0
282	2829	2292.11	2093.58	0.913386	674241	674723	483	b0643	ybeL	16128626	NP_415176.1		Cytoplasmic	CPR	1
18	233	72.2549	85.1571	1.17857	674793	675770	978	b0644	ybeQ	90111158	NP_415177.4		Secreted		1
77	1152	322.96	439.927	1.36217	682700	683635	936	b0651	rihA	16128634	NP_415184.1				1
27	169	146.003	83.2059	0.569893	683753	684478	726	b0652	gltL	16128635	NP_415185.1				0
9	203	52.3446	107.497	2.05364	684478	685152	675	b0653	gltK	16128636	NP_415186.1	multipass		MPR	0
14	247	74.1726	119.147	1.60635	685152	685892	741	b0654	gltJ	16128637	NP_415187.1	multipass		MPR	0
27	410	116.609	161.222	1.38258	686062	686970	909	b0655	gltI	16128638	NP_415188.1		Secreted		0
13	116	33.1618	26.9416	0.812428	688566	690104	1539	b0657	lnt	16128640	NP_415190.1	multipass		MPR	0
30	322	133.988	130.94	0.977249	690129	691007	879	b0658	ybeX	16128641	NP_415191.1				0
13	207	109.051	158.099	1.44976	691097	691564	468	b0659	ybeY	16128642	NP_415192.1				0
36	194	135.764	66.6124	0.490648	691561	692601	1041	b0660	ybeZ	145698230	NP_415193.2		Cytoplasmic	CPR	0
27	161	74.3845	40.3845	0.542916	692754	694178	1425	b0661	miaB	16128644	NP_415194.1		Cytoplasmic	CPR	1
96	947	320.477	287.837	0.898151	694324	695499	1176	b0662	ubiF	16128645	NP_415195.1		Cytoplasmic	CPR	1
8	192	18.8629	41.2184	2.18515	696736	698400	1665	b0674	asnB	16128650	NP_415200.1		Cytoplasmic	CPR	1
13	219	67.7769	103.957	1.53381	698797	699549	753	b0675	umpH	16128651	NP_415201.1		Cytoplasmic	CPR	0
28	450	90.0276	131.735	1.46327	699597	700817	1221	b0676	nagC	16128652	NP_415202.1		Cytoplasmic	CPR	0
14	154	47.8345	47.9076	1.00153	700826	701974	1149	b0677	nagA	16128653	NP_415203.1		Cytoplasmic	CPR	0
17	152	83.3201	67.8289	0.814076	702034	702834	801	b0678	nagB	16128654	NP_415204.1		Cytoplasmic	CPR	0
132	955	266.159	175.324	0.658719	703167	705113	1947	b0679	nagE	16128655	NP_415205.1	multipass		MPR	1
46	413	108.462	88.6625	0.817453	705316	706980	1665	b0680	glnS	16128656	NP_415206.1		Cytoplasmic	CPR	1
41	714	360.089	570.946	1.58557	709423	709869	447	b0683	fur	16128659	NP_415209.1		Cytoplasmic	CPR	0
5	158	225.623	649.145	2.87712	709862	709948	87	b4637	uof	157783150	YP_001491546.1				0
15	222	110.9	149.438	1.34751	710158	710688	531	b0684	fldA	16128660	NP_415210.1		Cytoplasmic	CPR	0
8	154	41.0546	71.9554	1.75267	711261	712025	765	b0686	ybfF	16128662	NP_415212.1				1
15	180	107.853	117.838	1.09258	712210	712755	546	b0687	seqA	16128663	NP_415213.1		Cytoplasmic	CPR	0
107	515	255.982	112.177	0.438222	712781	714421	1641	b0688	pgm	16128664	NP_415214.1		Cytoplasmic	CPR	0
4	61	11.8965	16.5181	1.38848	716169	717488	1320	b0692	potE	16128668	NP_415219.1	multipass		MPR	0
4	22	23.1613	11.5984	0.500764	720279	720956	678	b0694	kdpE	16128670	NP_415222.1		Cytoplasmic	CPR	0
15	198	21.9321	26.3588	1.20183	720953	723637	2685	b0695	kdpD	16128671	NP_415223.1	multipass		MPR	0
56	322	1062.07	556.019	0.523526	728357	728563	207	b0699	ybfA	16128675	NP_415228.1				1
14	188	13.1049	16.0226	1.22264	728806	732999	4194	b0700	rhsC	16128676	NP_415229.1				0
6	79	46.1865	55.3683	1.1988	738224	738733	510	b0707	ybgA	16128682	NP_415235.1				0
22	362	60.8659	91.1864	1.49815	738730	740148	1419	b0708	phr	16128683	NP_415236.1		Cytoplasmic	CPR	0
38	423	200.514	203.222	1.01351	742050	742793	744	b0710	ybgI	16128685	NP_415238.1		Cytoplasmic	CPR	0
39	605	233.041	329.15	1.41241	742816	743472	657	b0711	ybgJ	16128686	NP_415239.1		Cytoplasmic	CPR	0
53	514	223.012	196.918	0.882994	743466	744398	933	b0712	ybgK	16128687	NP_415240.1		Cytoplasmic	CPR	0
20	295	106.826	143.463	1.34296	744388	745122	735	b0713	ybgL	16128688	NP_415241.1		Cytoplasmic	CPR	0
18	188	89.2238	84.847	0.950946	745158	745949	792	b0714	nei	16128689	NP_415242.1		Cytoplasmic	CPR	0
23	852	86.2412	290.869	3.37273	745946	746992	1047	b0715	abrB	90111163	NP_415243.4	multipass		MPR	1
130	1356	397.477	377.484	0.949701	752408	753691	1284	b0720	gltA	16128695	NP_415248.1		Cytoplasmic	CPR	1
29	696	291.922	637.894	2.18515	754400	754789	390	b0721	sdhC	16128696	NP_415249.1	multipass		MPR	0
27	453	304.592	465.289	1.52758	754783	755130	348	b0722	sdhD	16128697	NP_415250.1	multipass		MPR	0
59	630	131.084	127.441	0.972208	755130	756896	1767	b0723	sdhA	16128698	NP_415251.1				0
13	187	71.18	93.2237	1.30969	756912	757628	717	b0724	sdhB	16128699	NP_415252.1				0
80	569	112.087	72.5852	0.647579	757929	760730	2802	b0726	sucA	16128701	NP_415254.1		Cytoplasmic	CPR	0
128	732	412.569	214.817	0.520681	760745	761962	1218	b0727	sucB	16128702	NP_415255.1		Cytoplasmic	CPR	0
126	1237	423.871	378.881	0.89386	762237	763403	1167	b0728	sucC	16128703	NP_415256.1		Cytoplasmic	CPR	0
95	952	428.685	391.13	0.912397	763403	764272	870	b0729	sucD	16128704	NP_415257.1		Cytoplasmic	CPR	0
8	37	43.4395	18.2923	0.421097	764376	765098	723	b0730	mngR	16128705	NP_415258.1		Cytoplasmic	CPR	1
7	123	10.4332	16.6914	1.59984	767201	769834	2634	b0732	mngB	16128707	NP_415260.1				0
1189	8043	2975.04	1832.31	0.615895	770681	772249	1569	b0733	cydA	90111166	NP_415261.2	multipass		MPR	0
868	5569	2989.15	1746.13	0.584155	772265	773404	1140	b0734	cydB	16128709	NP_415262.1	multipass		MPR	0
64	590	2203.99	1849.91	0.839349	773419	773532	114	b4515	cydX	94541102	YP_588444.1				0
55	1229	734.427	1494.2	2.03451	773532	773825	294	b0735	ybgE	16128710	NP_415263.1				0
6	118	58.1607	104.143	1.79061	773975	774379	405	b0736	ybgC	16128711	NP_415264.1				0
15	156	84.9751	80.4628	0.946899	774376	775068	693	b0737	tolQ	16128712	NP_415265.1	multipass		MPR	0
7	87	64.0581	72.488	1.1316	775072	775500	429	b0738	tolR	16128713	NP_415266.1				0
44	464	136.443	131.005	0.960143	775565	776830	1266	b0739	tolA	16128714	NP_415267.1		Cytoplasmic	CPR	0
45	421	136.63	116.382	0.851805	776963	778255	1293	b0740	tolB	16128715	NP_415268.1		Secreted		0
138	920	1037.87	629.972	0.606987	778290	778811	522	b0741	pal	16128716	NP_415269.1		Secreted		0
29	296	143.75	133.589	0.929318	778821	779612	792	b0742	ybgF	16128717	NP_415270.1		Secreted		0
7	115	38.168	57.0912	1.49579	782389	783108	720	b0751	pnuC	16128719	NP_415272.1	multipass		MPR	0
5	86	20.8378	32.6326	1.56603	783105	784046	942	b0752	zitB	16128720	NP_415273.1	multipass		MPR	1
69	565	257.249	191.789	0.745538	784856	785908	1053	b0754	aroG	16128722	NP_415275.1		Cytoplasmic	CPR	1
209	1623	1089.64	770.42	0.707038	786066	786818	753	b0755	gpmA	16128723	NP_415276.1		Cytoplasmic	CPR	1
803	6515	3028.3	2237.01	0.738702	787020	788060	1041	b0756	galM	16128724	NP_415277.1		Secreted		0
1470	11633	5022.63	3618.89	0.720518	788054	789202	1149	b0757	galK	16128725	NP_415278.1		Cytoplasmic	CPR	0
852	7858	3194.67	2682.68	0.839736	789206	790252	1047	b0758	galT	16128726	NP_415279.1				0
1285	7040	4960.39	2474.32	0.498816	790262	791278	1017	b0759	galE	49176045	NP_415280.3		Cytoplasmic	CPR	0
12	152	31.9825	36.8846	1.15327	791539	793011	1473	b0760	modF	16128728	NP_415281.1				0
21	277	104.49	125.489	1.20097	793079	793867	789	b0761	modE	16128729	NP_415282.1		Cytoplasmic	CPR	0
11	213	287.896	507.566	1.76302	793996	794145	150	b0762	acrZ	16128730	NP_415283.1				1
22	363	111.587	167.637	1.50229	794312	795085	774	b0763	modA	16128731	NP_415284.1		Secreted		0
13	225	73.9653	116.557	1.57583	795085	795774	690	b0764	modB	16128732	NP_415285.1	multipass		MPR	0
16	144	59.314	48.6038	0.819432	795777	796835	1059	b0765	modC	16128733	NP_415286.1				0
9	61	43.1412	26.6226	0.617103	796836	797654	819	b0766	ybhA	16128734	NP_415287.1		Cytoplasmic	CPR	1
61	659	240.439	236.499	0.983617	797809	798804	996	b0767	pgl	16128735	NP_415288.1		Secreted		1
8	58	24.4601	16.1461	0.660098	805221	806504	1284	b0772	ybhC	16128740	NP_415293.1		Secreted		1
14	238	115.224	178.346	1.54782	806656	807132	477	b0773	ybhB	16128741	NP_415294.1		Cytoplasmic	CPR	1
4	25	12.1732	6.92714	0.56905	807191	808480	1290	b0774	bioA	16128742	NP_415295.1		Cytoplasmic	CPR	1
105	872	203.865	154.149	0.756132	812749	814770	2022	b0779	uvrB	16128747	NP_415300.1		Cytoplasmic	CPR	1
7	121	30.2321	47.5801	1.57383	814962	815870	909	b0780	ybhK	16128748	NP_415301.1		Cytoplasmic	CPR	1
23	260	91.2066	93.8733	1.02924	816267	817256	990	b0781	moaA	16128749	NP_415302.1		Cytoplasmic	CPR	0
13	179	99.4854	124.721	1.25366	817278	817790	513	b0782	moaB	16128750	NP_415303.1		Cytoplasmic	CPR	0
13	137	105.012	100.76	0.959506	817793	818278	486	b0783	moaC	16128751	NP_415304.1		Cytoplasmic	CPR	0
6	84	95.7524	122.053	1.27467	818271	818516	246	b0784	moaD	16128752	NP_415305.1				0
13	168	112.662	132.561	1.17662	818518	818970	453	b0785	moaE	16128753	NP_415306.1		Cytoplasmic	CPR	0
65	1439	361.958	729.585	2.01566	819107	819811	705	b0786	ybhL	16128754	NP_415307.1	multipass		MPR	1
103	2213	983.85	1924.61	1.95621	823853	824263	411	b0791	ybhQ	16128759	NP_415312.1	multipass		MPR	1
18	362	63.8349	116.887	1.83108	824225	825331	1107	b0792	ybhR	16128760	NP_415313.1	multipass		MPR	0
51	444	176.559	139.95	0.792653	825342	826475	1134	b0793	ybhS	16128761	NP_415314.1	multipass		MPR	0
116	1086	262.175	223.478	0.852398	826468	828204	1737	b0794	ybhF	90111168	NP_415315.4				0
84	934	330.101	334.184	1.01237	828197	829195	999	b0795	ybhG	16128763	NP_415316.1				0
18	212	105.157	112.764	1.07234	829195	829866	672	b0796	ybiH	162135896	NP_415317.4		Cytoplasmic	CPR	0
40	370	115.043	96.8887	0.842194	830095	831459	1365	b0797	rhlE	16128765	NP_415318.1		Cytoplasmic	CPR	1
17	298	138.177	220.533	1.59602	831691	832173	483	b0798	ybiA	16128766	NP_415319.1		Cytoplasmic	CPR	1
118	1327	215.365	220.513	1.0239	832293	834443	2151	b0799	dinG	16128767	NP_415320.1		Cytoplasmic	CPR	1
51	568	207.911	210.827	1.01402	834471	835433	963	b0800	ybiB	16128768	NP_415321.1		Cytoplasmic	CPR	1
47	527	169.903	173.454	1.0209	835574	836659	1086	b0801	ybiC	16128769	NP_415322.1		Cytoplasmic	CPR	1
4	35	60.1663	47.9327	0.79667	836888	837148	261	b0802	ybiJ	16128770	NP_415323.1				1
4	38	16.94	14.6524	0.864956	841555	842481	927	b0807	rlmF	162135897	NP_415328.4		Cytoplasmic	CPR	1
6	68	10.5818	10.9191	1.03188	842478	844703	2226	b0808	ybiO	90111173	NP_415329.4	multipass		MPR	1
17	221	92.309	109.259	1.18362	844964	845686	723	b0809	glnQ	16128777	NP_415330.1				0
17	167	101.12	90.4433	0.894413	845683	846342	660	b0810	glnP	16128778	NP_415331.1	multipass		MPR	0
129	1864	677.958	891.927	1.31561	846481	847227	747	b0811	glnH	16128779	NP_415332.1		Secreted		0
176	2720	1370.93	1929.04	1.40711	847631	848134	504	b0812	dps	16128780	NP_415333.1		Cytoplasmic	CPR	1
161	2194	1224.93	1519.82	1.24074	849673	850188	516	b0814	ompX	16128782	NP_415335.1		Secreted		1
8	194	116.321	256.828	2.20791	851894	852163	270	b0816	N/A	16128784	NP_415337.1				1
17	339	142.606	258.915	1.8156	852406	852873	468	b0817	mntR	16128785	NP_415338.1		Cytoplasmic	CPR	0
27	334	94.7256	106.689	1.1263	852870	853988	1119	b0818	ybiR	16128786	NP_415339.1	multipass		MPR	0
13	124	55.4137	48.1245	0.868458	854047	854967	921	b0819	ybiS	16128787	NP_415340.1				1
16	264	39.431	59.2369	1.50229	855186	856778	1593	b0820	ybiT	16128788	NP_415341.1		Cytoplasmic	CPR	1
14	250	22.5902	36.7284	1.62586	859397	861829	2433	b0823	ybiW	16128791	NP_415344.1		Cytoplasmic	CPR	0
31	502	183.562	270.641	1.47439	862865	863527	663	b0825	fsaA	90111174	NP_415346.4		Cytoplasmic	CPR	1
23	174	120.393	82.9262	0.688798	863603	864352	750	b0826	moeB	16128794	NP_415347.1		Cytoplasmic	CPR	0
39	214	123.874	61.887	0.499597	864352	865587	1236	b0827	moeA	16128795	NP_415348.1		Cytoplasmic	CPR	0
16	389	65.0244	143.938	2.2136	865791	866756	966	b0828	iaaA	16128796	NP_415349.1				0
23	348	48.2343	66.4473	1.3776	866743	868614	1872	b0829	gsiA	145698235	NP_415350.2				0
25	292	63.7727	67.8185	1.06344	868634	870172	1539	b0830	gsiB	16128798	NP_415351.1		Secreted		0
14	290	59.6763	112.549	1.88599	870190	871110	921	b0831	gsiC	16128799	NP_415352.1	multipass		MPR	0
9	325	38.7419	127.377	3.28784	871113	872024	912	b0832	gsiD	16128800	NP_415353.1	multipass		MPR	0
280	2142	2862.6	1993.85	0.696517	877471	877854	384	b0836	bssR	16128804	NP_415357.1				1
32	488	112.569	156.3	1.38848	877965	879080	1116	b0837	yliI	16128805	NP_415358.1				1
18	220	112.704	125.418	1.11281	879077	879703	627	b0838	gstB	90111175	NP_415359.4		Cytoplasmic	CPR	1
32	353	104.428	104.885	1.00437	879950	881152	1203	b0839	dacC	16128807	NP_415360.1				1
6	182	31.0344	85.7104	2.76179	881199	881957	759	b0840	deoR	16128808	NP_415361.1		Cytoplasmic	CPR	1
4	75	12.7359	21.7421	1.70715	882896	884128	1233	b0842	mdfA	16128810	NP_415363.1	multipass		MPR	1
30	584	69.855	123.811	1.7724	887357	889042	1686	b0847	ybjL	16128815	NP_415368.1	multipass		MPR	1
7	159	72.7009	150.352	2.06809	889312	889689	378	b0848	ybjM	16128816	NP_415369.1	multipass		MPR	1
5	101	68.1571	125.352	1.83917	890136	890423	288	b0850	ybjC	16128818	NP_415371.1				0
18	174	97.739	86.0231	0.880131	890407	891129	723	b0851	nfsA	16128819	NP_415372.1		Cytoplasmic	CPR	0
12	193	52.1707	76.3965	1.46436	891190	892092	903	b0852	rimK	16128820	NP_415373.1		Cytoplasmic	CPR	1
30	496	246.909	371.678	1.50533	892180	892656	477	b0853	ybjN	16128821	NP_415374.1				1
4	37	18.5619	15.6327	0.842194	896307	897152	846	b0857	potI	16128825	NP_415378.1	multipass		MPR	0
22	288	129.101	153.876	1.1919	900089	900757	669	b0861	artM	16128829	NP_415382.1	multipass		MPR	0
25	242	136.885	120.642	0.881345	900757	901473	717	b0862	artQ	16128830	NP_415383.1	multipass		MPR	0
26	176	139.443	85.942	0.616325	901480	902211	732	b0863	artI	16128831	NP_415384.1		Secreted		0
8	57	43.082	27.948	0.648717	902229	902957	729	b0864	artP	16128832	NP_415385.1				0
6	99	45.6494	68.5787	1.50229	903175	903690	516	b0865	ybjP	16128833	NP_415386.1				1
27	273	327.154	301.177	0.920596	903816	904139	324	b0866	ybjQ	16128834	NP_415387.1				0
44	389	207.867	167.322	0.804947	904136	904966	831	b0867	amiD	16128835	NP_415388.1				0
7	240	27.1015	84.6013	3.12165	904963	905976	1014	b0868	ybjS	90111178	NP_415389.2		Cytoplasmic	CPR	1
10	150	27.4343	37.4676	1.36572	906075	907505	1431	b0869	ybjT	90111179	NP_415390.4				0
19	170	74.4422	60.6436	0.81464	907516	908517	1002	b0870	ltaE	16128838	NP_415391.1		Cytoplasmic	CPR	0
63	535	143.879	111.245	0.773185	908554	910272	1719	b0871	poxB	16128839	NP_415392.1				0
645	5023	2613.18	1852.86	0.709045	910405	911373	969	b0872	hcr	16128840	NP_415393.1		Cytoplasmic	CPR	0
1194	10271	2835.73	2220.98	0.783211	911385	913037	1653	b0873	hcp	90111180	NP_415394.4		Cytoplasmic	CPR	0
15	365	84.6088	187.451	2.2155	914575	915270	696	b0875	aqpZ	16128843	NP_415396.1	multipass		MPR	1
36	416	85.1902	89.6295	1.05211	915696	917354	1659	b0876	ybjD	16128844	NP_415397.1		Cytoplasmic	CPR	1
10	151	39.5352	54.354	1.37482	917351	918343	993	b0877	ybjX	16128845	NP_415398.1				1
31	179	109.051	57.3314	0.525729	918458	919573	1116	b0878	macA	90111182	NP_415399.4				0
40	500	80.6543	91.7927	1.1381	919570	921516	1947	b0879	macB	16128847	NP_415400.1	multipass		MPR	0
156	6623	2721.92	10521.5	3.86545	921589	921813	225	b0880	cspD	16128848	NP_415401.1		Cytoplasmic	csp	1
57	703	697.113	782.806	1.12293	922136	922456	321	b0881	clpS	16128849	NP_415402.1		Cytoplasmic	CPR	1
1606	10197	2768.96	1600.71	0.578092	922487	924763	2277	b0882	clpA	16128850	NP_415403.1		Cytoplasmic	CPR	1
46	578	824.607	943.382	1.14404	925448	925666	219	b0884	infA	16128851	NP_415404.1		Cytoplasmic	CPR	1
10	166	55.6858	84.1633	1.5114	925951	926655	705	b0885	aat	16128852	NP_415405.1		Cytoplasmic	CPR	1
25	256	56.9955	53.1387	0.932332	926697	928418	1722	b0886	cydC	16128853	NP_415406.1	multipass		MPR	0
34	410	75.5398	82.9376	1.09793	928419	930185	1767	b0887	cydD	16128854	NP_415407.1	multipass		MPR	0
20	214	81.2805	79.1846	0.974214	930308	931273	966	b0888	trxB	16128855	NP_415408.1		Cytoplasmic	CPR	1
33	463	261.723	334.333	1.27743	931818	932312	495	b0889	lrp	16128856	NP_415409.1		Cytoplasmic	CPR	1
137	1254	134.797	112.339	0.833388	932447	936436	3990	b0890	ftsK	16128857	NP_415410.1	multipass		MPR	1
25	304	160.37	177.552	1.10714	936595	937206	612	b0891	lolA	145698236	NP_415411.2		Secreted		1
26	253	75.9465	67.2861	0.885967	937217	938560	1344	b0892	rarA	16128859	NP_415412.1		Cytoplasmic	CPR	1
379	2626	1150.73	725.939	0.63085	938651	939943	1293	b0893	serS	16128860	NP_415413.1		Cytoplasmic	CPR	1
561	5195	900.778	759.47	0.843127	940182	942626	2445	b0894	dmsA	90111183	NP_415414.4				0
211	2443	1340.38	1412.99	1.05417	942637	943254	618	b0895	dmsB	16128862	NP_415415.1				0
545	7529	2476.37	3114.78	1.2578	943256	944119	864	b0896	dmsC	16128863	NP_415416.1	multipass		MPR	0
88	916	550.996	522.194	0.947727	944154	944780	627	b0897	ycaC	16128864	NP_415417.1				1
26	263	88.8356	81.8163	0.920986	945094	946242	1149	b0898	ycaD	16128865	NP_415418.1	multipass		MPR	1
46	553	243.71	266.754	1.09456	949563	950303	741	b0902	pflA	16128869	NP_415422.1		Cytoplasmic	CPR	1
948	4483	1630.18	701.886	0.430557	950495	952777	2283	b0903	pflB	16128870	NP_415423.1		Cytoplasmic	CPR	1
72	956	329.442	398.267	1.20892	952832	953689	858	b0904	focA	16128871	NP_415424.1	multipass		MPR	1
8	78	17.8346	15.8321	0.887718	954095	955855	1761	b0905	ycaO	90111185	NP_415425.4		Cytoplasmic	CPR	1
7	94	39.655	48.484	1.22264	955985	956677	693	b0906	ycaP	16128873	NP_415426.1	multipass	Cytoplasmic	CPR	1
25	400	90.1251	131.291	1.45677	956876	957964	1089	b0907	serC	16128874	NP_415427.1		Cytoplasmic	CPR	0
21	163	120.53	85.1796	0.706706	960424	961107	684	b0910	cmk	16128877	NP_415430.1		Cytoplasmic	CPR	0
340	1155	797.365	246.621	0.309295	961218	962891	1674	b0911	rpsA	16128878	NP_415431.1		Cytoplasmic	CPR	0
18	111	247.948	139.214	0.561463	963051	963335	285	b0912	ihfB	16128879	NP_415432.1		Cytoplasmic	CPR	0
12	210	20.7992	33.1402	1.59334	963543	965807	2265	b0913	ycaI	90111187	NP_415433.4	multipass		MPR	0
24	180	53.871	36.7863	0.68286	965844	967592	1749	b0914	msbA	16128881	NP_415434.1	multipass		MPR	0
17	126	67.6185	45.6307	0.674826	967589	968575	987	b0915	lpxK	16128882	NP_415435.1				0
6	64	19.1039	18.5533	0.971179	968612	969844	1233	b0916	ycaQ	16128883	NP_415436.1		Cytoplasmic	CPR	0
6	58	128.716	113.287	0.880131	969896	970078	183	b0917	ycaR	16128884	NP_415437.1				0
54	737	283.796	352.656	1.24264	970075	970821	747	b0918	kdsB	16128885	NP_415438.1		Cytoplasmic	CPR	0
417	4375	1831.18	1749.22	0.95524	970975	971868	894	b0919	ycbJ	16128886	NP_415439.1		Cytoplasmic	CPR	1
45	483	226.491	221.338	0.977249	971845	972624	780	b0920	ycbC	16128887	NP_415440.1				1
25	382	124.868	173.718	1.39121	972760	973545	786	b0921	smtA	16128888	NP_415441.1		Cytoplasmic	CPR	0
35	389	103.858	105.098	1.01193	973542	974864	1323	b0922	mukF	16128889	NP_415442.1		Cytoplasmic	CPR	0
14	121	77.9601	61.348	0.786915	974845	975549	705	b0923	mukE	226524705	NP_415443.2		Cytoplasmic	CPR	0
125	821	110.005	65.7832	0.598003	975549	980009	4461	b0924	mukB	16128891	NP_415444.1		Cytoplasmic	CPR	0
51	604	108.343	116.826	1.07829	980270	982117	1848	b0925	ycbB	16128892	NP_415445.1		Secreted		1
14	303	100.113	197.276	1.97054	982298	982846	549	b0926	ycbK	16128893	NP_415446.1				0
59	905	357.446	499.203	1.39658	982873	983520	648	b0927	ycbL	16128894	NP_415447.1		Cytoplasmic	CPR	0
50	510	164.813	153.06	0.92869	983742	984932	1191	b0928	aspC	16128895	NP_415448.1		Cytoplasmic	CPR	1
1119	12950	4034	4250.56	1.05368	985117	986205	1089	b0929	ompF	16128896	NP_415449.1		Secreted		1
106	918	297.031	234.212	0.78851	986808	988208	1401	b0930	asnS	16128897	NP_415450.1		Cytoplasmic	CPR	1
29	267	94.6381	79.3322	0.83827	988377	989579	1203	b0931	pncB	16128898	NP_415451.1		Cytoplasmic	CPR	1
144	1574	216.35	215.313	0.995205	989845	992457	2613	b0932	pepN	16128899	NP_415452.1				1
7	69	35.7825	32.1138	0.897473	992500	993267	768	b0933	ssuB	16128900	NP_415453.1				0
9	122	34.9482	43.1333	1.23421	1003991	1005001	1011	b0945	pyrD	16128912	NP_415465.1				1
9	152	65.0693	100.057	1.5377	1005175	1005717	543	b0946	zapC	90111193	NP_415466.4				1
14	144	49.5152	46.3707	0.936494	1005714	1006823	1110	b0947	ycbX	16128914	NP_415467.1				1
21	189	39.091	32.0324	0.819432	1007067	1009175	2109	b0948	rlmL	16128915	NP_415468.1		Cytoplasmic	CPR	0
17	207	34.9787	38.7789	1.10864	1009187	1011094	1908	b0949	uup	16128916	NP_415469.1		Cytoplasmic	CPR	0
12	190	37.5679	54.1577	1.44159	1011224	1012477	1254	b0950	pqiA	16128917	NP_415470.1	multipass		MPR	0
5	101	11.9618	21.9997	1.83917	1012482	1014122	1641	b0951	pqiB	16128918	NP_415471.1				0
11	102	76.568	64.6435	0.844263	1014119	1014682	564	b0952	ymbA	145698237	NP_415472.2				1
75	863	1752.61	1836.14	1.04766	1014938	1015105	168	b0953	rmf	16128920	NP_415473.1				1
43	476	325.263	327.826	1.00788	1015175	1015693	519	b0954	fabA	16128921	NP_415474.1		Cytoplasmic	CPR	1
33	344	73.5679	69.8237	0.949106	1015762	1017522	1761	b0955	ycbZ	16128922	NP_415475.1		Cytoplasmic	CPR	1
8	143	69.3307	112.834	1.62748	1017708	1018160	453	b0956	matP	16128923	NP_415476.1		Cytoplasmic	CPR	1
2727	17344	10284.1	5955.28	0.579075	1018236	1019276	1041	b0957	ompA	16128924	NP_415477.1		Secreted		1
19	171	146.257	119.848	0.819432	1019633	1020142	510	b0958	sulA	16128925	NP_415478.1				1
11	155	68.5466	87.9418	1.28295	1020361	1020990	630	b0959	sxy	16128926	NP_415479.1				1
13	139	23.6936	23.066	0.973513	1020953	1023106	2154	b0960	yccS	90111194	NP_415480.2	multipass		MPR	0
5	67	43.9133	53.5761	1.22004	1023125	1023571	447	b0961	yccF	16128928	NP_415481.1	multipass		MPR	0
47	620	89.7883	107.841	1.20106	1023694	1025748	2055	b0962	helD	16128929	NP_415482.1		Cytoplasmic	CPR	1
185	2402	1582.31	1870.53	1.18215	1025780	1026238	459	b0963	mgsA	90111195	NP_415483.2		Cytoplasmic	CPR	1
96	658	910.342	568.106	0.624058	1027169	1027582	414	b0965	yccU	90111196	NP_415485.4				1
48	228	592.581	256.278	0.432478	1027627	1027944	318	b0966	hspQ	145698238	NP_415486.4				1
10	80	32.9626	24.0094	0.728384	1028002	1029192	1191	b0967	rlmI	145698239	NP_415487.4		Cytoplasmic	CPR	1
6	115	84.4269	147.332	1.74509	1029287	1029565	279	b0968	yccX	16128935	NP_415488.1		Cytoplasmic	CPR	1
14	104	166.551	112.648	0.676357	1029562	1029891	330	b0969	tusE	90111197	NP_415489.4		Cytoplasmic	CPR	1
68	959	404.481	519.372	1.28404	1029982	1030641	660	b0970	yccA	16128937	NP_415490.1	multipass		MPR	1
78	812	273.652	259.376	0.947833	1031362	1032480	1119	b0972	hyaA	16128938	NP_415491.1				0
89	858	194.761	170.95	0.877744	1032477	1034270	1794	b0973	hyaB	16128939	NP_415492.1				0
48	504	266.159	254.449	0.956004	1034289	1034996	708	b0974	hyaC	16128940	NP_415493.1	multipass		MPR	0
54	519	360.537	315.496	0.875072	1034993	1035580	588	b0975	hyaD	16128941	NP_415494.1		Cytoplasmic	CPR	0
20	238	196.784	213.21	1.08347	1035577	1035975	399	b0976	hyaE	16128942	NP_415495.1				0
28	272	128.116	113.315	0.884466	1035972	1036829	858	b0977	hyaF	16128943	NP_415496.1		Cytoplasmic	CPR	0
31	350	78.7711	80.9736	1.02796	1036963	1038507	1545	b0978	appC	16128944	NP_415497.1	multipass		MPR	0
36	405	124.301	127.321	1.02429	1038519	1039655	1137	b0979	appB	16128945	NP_415498.1	multipass		MPR	0
13	135	39.2887	37.1474	0.945499	1039840	1041138	1299	b0980	appA	16128946	NP_415500.1		Secreted		1
6	82	10.8001	13.4389	1.24432	1041253	1043433	2181	b0981	etk	16128947	NP_415501.1	multipass		MPR	0
125	2721	2303.9	4566.18	1.98193	1050684	1050896	213	b0990	cspG	16128956	NP_415510.1		Cytoplasmic	csp	1
9	134	152.955	207.347	1.3556	1051070	1051300	231	b0991	ymcE	16128957	NP_415511.1				0
92	2328	336.292	774.788	2.30391	1051512	1052585	1074	b0992	yccM	16128958	NP_415512.1	multipass		MPR	1
11	120	15.732	15.6258	0.993251	1052657	1055401	2745	b0993	torS	90111200	NP_415513.2	multipass		MPR	1
9	185	34.3369	64.2629	1.87154	1055484	1056512	1029	b0994	torT	16128960	NP_415514.1		Secreted		1
8	63	12.3309	8.84129	0.717003	1058479	1061025	2547	b0997	torA	16128963	NP_415517.1		Secreted		0
8	99	52.3446	58.9777	1.12672	1061022	1061621	600	b0998	torD	16128964	NP_415518.1		Cytoplasmic	CPR	0
77	1029	987.877	1201.98	1.21673	1061773	1062078	306	b0999	cbpM	16128965	NP_415519.1				0
153	2285	652.177	886.81	1.35977	1062078	1062998	921	b1000	cbpA	16128966	NP_415520.1		Cytoplasmic	CPR	0
445	4198	1406.6	1208.16	0.85892	1064808	1066049	1242	b1002	agp	16128968	NP_415522.1		Secreted		1
163	2214	2806.64	3470.94	1.23669	1066087	1066314	228	b1003	yccJ	16128969	NP_415523.1				0
429	6002	2821.09	3593.57	1.27382	1066335	1066931	597	b1004	wrbA	16128970	NP_415524.1				0
7	84	20.6779	22.5922	1.09258	1067734	1069062	1329	b1006	rutG	90111201	NP_415526.4	multipass		MPR	0
9	115	8.91563	10.3724	1.16339	1074143	1078105	3963	b1014	putA	16128980	NP_415534.1		Cytoplasmic	CPR	1
16	230	41.626	54.4807	1.30882	1078528	1080036	1509	b1015	putP	16128981	NP_415535.1	multipass		MPR	1
8	79	12.9566	11.6493	0.899099	1089089	1091512	2424	b1024	pgaA	16128988	NP_415543.1				0
16	178	66.8941	67.7577	1.01291	1097109	1098047	939	b1033	ghrA	90111205	NP_415551.2		Cytoplasmic	CPR	1
15	186	79.7937	90.0867	1.129	1098102	1098839	738	b1034	ycdX	16128997	NP_415552.1		Cytoplasmic	CPR	0
17	306	120.251	197.075	1.63886	1098863	1099417	555	b1035	ycdY	16128998	NP_415553.1				0
38	591	303.216	429.365	1.41604	1099519	1100010	492	b1036	ycdZ	90111206	NP_415554.4	multipass		MPR	1
4	73	18.829	31.2868	1.66163	1100074	1100907	834	b1037	csgG	16129000	NP_415555.1				0
26	333	191.146	222.898	1.16611	1105043	1105576	534	b1045	ymdB	16129008	NP_415563.1		Cytoplasmic	CPR	0
29	418	80.063	105.07	1.31235	1105578	1106999	1422	b1046	clsC	90111207	NP_415564.2				0
5	22	16.951	6.79076	0.400611	1107007	1108164	1158	b1047	mdoC	16129010	NP_415565.1	multipass		MPR	1
48	571	122.683	132.877	1.08309	1108558	1110093	1536	b1048	mdoG	16129011	NP_415566.1		Secreted		0
107	1097	165.12	154.132	0.933455	1110086	1112629	2544	b1049	mdoH	16129012	NP_415567.1	multipass		MPR	0
29	344	499.34	539.296	1.08002	1112802	1113029	228	b1050	yceK	16129013	NP_415568.1				1
21	312	219.848	297.391	1.35271	1113030	1113404	375	b1051	msyB	90111208	NP_415569.4		Cytoplasmic	CPR	1
20	356	63.991	103.707	1.62065	1113487	1114713	1227	b1053	mdtG	16129016	NP_415571.1	multipass		MPR	1
14	144	59.6763	55.8865	0.936494	1114885	1115805	921	b1054	lpxL	16129017	NP_415572.1				1
6	161	22.3695	54.6514	2.44312	1116030	1117082	1053	b1055	yceA	16129018	NP_415573.1		Cytoplasmic	CPR	1
5	40	17.5418	12.7771	0.728384	1118691	1119809	1119	b1059	solA	16129022	NP_415577.1		Cytoplasmic	CPR	0
280	9076	4310.74	12722.1	2.95126	1119924	1120178	255	b1060	bssS	49176074	NP_415578.3				1
6	55	22.4977	18.7767	0.834607	1120784	1121830	1047	b1062	pyrC	16129025	NP_415580.1		Cytoplasmic	CPR	1
4	108	27.9918	68.8121	2.4583	1121936	1122496	561	b1063	yceB	16129026	NP_415581.1				1
16	230	96.9345	126.869	1.30882	1122630	1123277	648	b1064	grxB	16129027	NP_415582.1		Cytoplasmic	CPR	1
41	687	133.135	203.111	1.52561	1123341	1124549	1209	b1065	mdtH	90111209	NP_415583.4	multipass		MPR	1
15	229	100.663	139.921	1.39	1124785	1125369	585	b1066	rimJ	16129029	NP_415584.1		Cytoplasmic	CPR	1
7	117	42.4089	64.5379	1.5218	1125380	1126027	648	b1067	yceH	16129030	NP_415585.1				1
24	245	101.97	94.7759	0.929448	1126029	1126952	924	b1068	yceM	16129031	NP_415586.1				1
10	192	25.5589	44.6801	1.74812	1127062	1128597	1536	b1069	murJ	16129032	NP_415587.1	multipass		MPR	1
6	18	80.1194	21.8841	0.273144	1129058	1129351	294	b1071	flgM	16129034	NP_415589.1		Cytoplasmic	CPR	0
4	41	23.793	22.2046	0.933242	1129427	1130086	660	b1072	flgA	16129035	NP_415590.1		Secreted		0
4	34	37.658	29.1438	0.773908	1130241	1130657	417	b1073	flgB	16129036	NP_415591.1		Secreted		0
6	65	58.1607	57.367	0.986353	1130661	1131065	405	b1074	flgC	16129037	NP_415592.1		Secreted		0
18	118	101.531	60.6006	0.59687	1131077	1131772	696	b1075	flgD	16129038	NP_415593.1		Secreted		0
12	122	38.9662	36.0693	0.925655	1131797	1133005	1209	b1076	flgE	16129039	NP_415594.1		Secreted		0
11	153	57.1221	72.3392	1.26639	1133025	1133780	756	b1077	flgF	16129040	NP_415595.1		Secreted		0
21	217	105.291	99.0608	0.940829	1133952	1134734	783	b1078	flgG	16129041	NP_415596.1		Secreted		0
9	85	50.5474	43.4656	0.859898	1134787	1135485	699	b1079	flgH	16129042	NP_415597.1		Secreted		0
12	77	42.9054	25.0664	0.584225	1135497	1136594	1098	b1080	flgI	49176076	NP_415598.3		Secreted		0
7	52	29.173	19.7313	0.676357	1136594	1137535	942	b1081	flgJ	16129044	NP_415599.1		Secreted		0
7	86	16.7159	18.6982	1.11859	1137601	1139244	1644	b1082	flgK	16129045	NP_415600.1		Secreted		0
6	100	24.6909	37.4676	1.51747	1139256	1140209	954	b1083	flgL	16129046	NP_415601.1		Secreted		0
206	1950	253.837	218.773	0.861862	1140405	1143590	3186	b1084	rne	16129047	NP_415602.1		Cytoplasmic	CPR	1
4	36	48.9202	40.0868	0.819432	1143725	1144045	321	b1085	yceQ	90111210	NP_415603.2				1
9	101	36.8048	37.6057	1.02176	1144163	1145122	960	b1086	rluC	16129049	NP_415604.1		Cytoplasmic	CPR	1
6	176	40.2651	107.538	2.67074	1145234	1145818	585	b1087	yceF	90111211	NP_415605.2		Cytoplasmic	CPR	1
70	430	526.455	294.443	0.559295	1146017	1146538	522	b1088	yceD	16129051	NP_415606.1		Cytoplasmic	CPR	0
39	239	879.932	490.967	0.557961	1146590	1146763	174	b1089	rpmF	16129052	NP_415607.1		Cytoplasmic	CPR	0
24	472	87.9742	157.528	1.79061	1146844	1147914	1071	b1090	plsX	90111212	NP_415608.2		Cytoplasmic	CPR	0
55	544	226.333	203.824	0.900548	1147982	1148935	954	b1091	fabH	16129054	NP_415609.1		Cytoplasmic	CPR	0
79	548	333.486	210.621	0.631574	1148951	1149880	930	b1092	fabD	16129055	NP_415610.1		Cytoplasmic	CPR	0
365	3958	1949.57	1924.83	0.98731	1149893	1150627	735	b1093	fabG	16129056	NP_415611.1		Cytoplasmic	CPR	0
399	5135	6609.34	7744.55	1.17176	1150838	1151074	237	b1094	acpP	16129057	NP_415612.1		Cytoplasmic	CPR	0
306	1465	967.238	421.619	0.4359	1151162	1152403	1242	b1095	fabF	16129058	NP_415613.1		Cytoplasmic	CPR	0
11	147	53.314	64.8689	1.21673	1152523	1153332	810	b1096	pabC	16129059	NP_415614.1		Cytoplasmic	CPR	0
13	84	49.8886	29.35	0.58831	1153335	1154357	1023	b1097	yceG	16129060	NP_415615.1				0
27	173	165.106	96.3197	0.583382	1154347	1154988	642	b1098	tmk	16129061	NP_415616.1		Cytoplasmic	CPR	0
17	86	66.4074	30.587	0.460596	1154985	1155989	1005	b1099	holB	16129062	NP_415617.1		Cytoplasmic	CPR	0
22	564	108.231	252.627	2.33414	1156000	1156797	798	b1100	ycfH	16129063	NP_415618.1		Cytoplasmic	CPR	0
53	603	145.098	150.305	1.03589	1157092	1158525	1434	b1101	ptsG	16129064	NP_415619.1	multipass		MPR	1
15	137	163.577	136.026	0.831572	1161108	1161467	360	b1103	hinT	49176077	NP_415621.3		Cytoplasmic	CPR	0
20	237	207.717	224.11	1.07892	1161470	1161847	378	b1104	ycfL	16129067	NP_415622.1				0
16	232	97.8405	129.169	1.3202	1161861	1162502	642	b1105	lpoB	16129068	NP_415623.1				0
11	127	52.3446	55.0242	1.05119	1162483	1163307	825	b1106	thiK	16129069	NP_415624.1				0
53	482	202.797	167.92	0.828021	1163318	1164343	1026	b1107	nagZ	16129070	NP_415625.1		Cytoplasmic	CPR	0
271	1746	1959.31	1149.34	0.586604	1164366	1164908	543	b1108	ycfP	90111213	NP_415626.4		Cytoplasmic	CPR	0
41	296	123.341	81.0747	0.657322	1165308	1166612	1305	b1109	ndh	16129072	NP_415627.1				1
21	223	152.672	147.61	0.966843	1166822	1167361	540	b1110	ycfJ	16129073	NP_415628.1		Secreted		1
17	77	258.68	106.678	0.412394	1168296	1168553	258	b1112	bhsA	16129075	NP_415630.1				1
20	277	22.7783	28.7238	1.26101	1169741	1173187	3447	b1114	mfd	16129077	NP_415632.1		Cytoplasmic	CPR	1
10	75	32.7154	22.34	0.68286	1174650	1175849	1200	b1116	lolC	16129079	NP_415634.1	multipass		MPR	0
8	58	44.739	29.5321	0.660098	1175842	1176543	702	b1117	lolD	90111215	NP_415635.4				0
21	310	66.2191	89.0013	1.34404	1176543	1177787	1245	b1118	lolE	16129081	NP_415636.1	multipass		MPR	0
49	440	210.928	172.449	0.817574	1177816	1178727	912	b1119	nagK	16129082	NP_415637.1		Cytoplasmic	CPR	0
14	205	65.4308	87.2325	1.3332	1178743	1179582	840	b1120	cobB	16129083	NP_415638.1				0
6	59	22.4977	20.1423	0.895305	1181006	1182052	1047	b1123	potD	16129086	NP_415641.1		Secreted		0
5	44	23.7068	18.9944	0.801222	1182840	1183667	828	b1125	potB	162135921	NP_415643.3	multipass		MPR	0
10	70	34.5281	22.006	0.637336	1183681	1184817	1137	b1126	potA	16129089	NP_415644.1				0
49	451	156.778	131.382	0.838013	1185067	1186293	1227	b1127	pepT	16129090	NP_415645.1		Cytoplasmic	CPR	1
70	845	244.928	269.196	1.09908	1186342	1187463	1122	b1128	ycfD	90111217	NP_415646.4		Cytoplasmic	CPR	1
44	418	118.232	102.266	0.864956	1187539	1188999	1461	b1129	phoQ	16129092	NP_415647.1	multipass		MPR	0
47	591	274.576	314.356	1.14488	1188999	1189670	672	b1130	phoP	16129093	NP_415648.1		Cytoplasmic	CPR	0
8	92	22.9079	23.9858	1.04705	1189839	1191209	1371	b1131	purB	16129094	NP_415649.1		Cytoplasmic	CPR	0
6	68	36.6902	37.8598	1.03188	1191213	1191854	642	b1132	hflD	16129095	NP_415650.1				0
40	289	141.855	93.3156	0.657822	1191890	1192996	1107	b1133	mnmA	90111218	NP_415651.4		Cytoplasmic	CPR	1
10	49	84.9751	37.9104	0.446135	1193050	1193511	462	b1134	nudJ	16129097	NP_415652.1		Cytoplasmic	CPR	0
284	2229	891.24	636.879	0.714599	1194346	1195596	1251	b1136	icd	16129099	NP_415654.1		Cytoplasmic	CPR	1
5	54	29.0804	28.5953	0.983318	1201482	1202156	675	b1145	ymfK	16129108	NP_415663.1		Cytoplasmic	CPR	1
20	309	5.16797	7.26974	1.40669	1195443	1210635	15193	N/A	N/A	N/A	N/A				1
18	481	96.5373	234.876	2.43301	1212551	1213282	732	b1162	bluR	16129125	NP_415680.1		Cytoplasmic	CPR	1
11	187	35.6306	55.1497	1.54782	1213487	1214698	1212	b1163	bluF	16129126	NP_415681.1				1
10	147	147.036	196.793	1.33841	1223502	1223768	267	b1174	minE	16129137	NP_415692.1		Cytoplasmic	CPR	0
55	553	265.586	243.13	0.915446	1223772	1224584	813	b1175	minD	16129138	NP_415693.1				0
44	540	248.186	277.325	1.11741	1224608	1225303	696	b1176	minC	16129139	NP_415694.1		Cytoplasmic	CPR	0
10	156	106.392	151.113	1.42035	1225823	1226191	369	b1177	ycgJ	16129140	NP_415695.1				1
4	58	17.2186	22.732	1.3202	1228706	1229617	912	b1182	hlyE	162135899	NP_415700.4		Secreted		1
17	455	125.686	306.282	2.43687	1231723	1232253	531	b1185	dsbB	49176085	NP_415703.3	multipass		MPR	1
13	153	33.0973	35.4659	1.07156	1232399	1233940	1542	b1186	nhaB	16129149	NP_415704.1	multipass		MPR	1
58	1086	316.249	539.14	1.7048	1234161	1234880	720	b1187	fadR	16129150	NP_415705.1		Cytoplasmic	CPR	1
58	740	148.532	172.541	1.16165	1234932	1236464	1533	b1188	ycgB	16129151	NP_415706.1		Cytoplasmic	CPR	1
40	325	120.888	89.429	0.739765	1236794	1238092	1299	b1189	dadA	16129152	NP_415707.1				0
20	136	73.3118	45.3893	0.619126	1238102	1239172	1071	b1190	dadX	16129153	NP_415708.1		Cytoplasmic	CPR	0
25	506	56.5033	104.125	1.84281	1239558	1241294	1737	b1191	cvrA	90111230	NP_415709.2	multipass		MPR	1
7	80	30.0338	31.2516	1.04055	1241389	1242303	915	b1192	ldcA	16129155	NP_415710.1		Cytoplasmic	CPR	1
10	94	64.1479	54.901	0.855851	1242403	1243014	612	b1193	emtA	90111231	NP_415711.2				1
5	146	76.9774	204.652	2.6586	1243951	1244205	255	b1195	ymgE	16129158	NP_415713.1	multipass		MPR	1
7	33	16.1843	6.94673	0.429226	1244902	1246599	1698	b1197	treA	16129160	NP_415715.1		Secreted		1
83	973	229.63	245.095	1.06735	1246919	1248337	1419	b1198	dhaM	226524708	NP_415716.4		Cytoplasmic	CPR	0
30	474	186.059	267.657	1.43856	1248348	1248980	633	b1199	dhaL	16129162	NP_415717.1				0
53	636	194.276	212.262	1.09258	1248991	1250061	1071	b1200	dhaK	162135900	NP_415718.6				0
9	101	18.4024	18.8029	1.02176	1250289	1252208	1920	b1201	dhaR	90111234	NP_415719.2		Cytoplasmic	CPR	1
12	134	16.4261	16.7005	1.0167	1252308	1255175	2868	b1202	ycgV	16129165	NP_415720.1		Secreted		1
16	131	57.5216	42.8798	0.745456	1255944	1257035	1092	b1203	ychF	16129166	NP_415721.1				0
4	38	26.8434	23.2184	0.864956	1257152	1257736	585	b1204	pth	16129167	NP_415722.1		Cytoplasmic	CPR	0
205	3823	2884.58	4897.83	1.69793	1258014	1258292	279	b1205	ychH	16129168	NP_415723.1				1
15	328	35.0522	69.786	1.99092	1258347	1260026	1680	b1206	dauA	90111235	NP_415724.2	multipass		MPR	1
39	195	161.506	73.5242	0.45524	1260151	1261098	948	b1207	prs	16129170	NP_415725.1		Cytoplasmic	CPR	1
41	518	188.92	217.317	1.15031	1261249	1262100	852	b1208	ispE	16129171	NP_415726.1		Cytoplasmic	CPR	0
9	125	56.6228	71.6027	1.26456	1262100	1262723	624	b1209	lolB	16129172	NP_415727.1		Secreted		0
31	318	96.8189	90.4265	0.933976	1262937	1264193	1257	b1210	hemA	16129173	NP_415728.1		Cytoplasmic	CPR	1
17	127	61.6246	41.9159	0.680182	1264235	1265317	1083	b1211	prfA	16129174	NP_415729.1		Cytoplasmic	CPR	0
10	67	47.0725	28.7153	0.610022	1265317	1266150	834	b1212	prmC	16129175	NP_415730.1		Cytoplasmic	CPR	0
10	106	99.8944	96.4089	0.965109	1266147	1266539	393	b1213	ychQ	16129176	NP_415731.1				0
35	536	169.635	236.529	1.39434	1266543	1267352	810	b1214	ychA	16129177	NP_415732.1		Cytoplasmic	CPR	0
34	324	156.116	135.451	0.867634	1267388	1268242	855	b1215	kdsA	16129178	NP_415733.1		Cytoplasmic	CPR	1
6	47	21.3943	15.2586	0.713209	1269972	1271072	1101	b1216	chaA	16129179	NP_415734.1	multipass		MPR	1
8	154	45.1247	79.0889	1.75267	1271730	1272425	696	b1218	chaC	145698247	NP_415736.2				1
113	1409	1253.17	1422.69	1.13528	1272469	1272822	354	b1219	ychN	16129182	NP_415737.1				1
11	112	30.9565	28.6977	0.927034	1273007	1274401	1395	b1220	ychO	145698248	NP_415738.2		Secreted		1
43	289	259.311	158.68	0.611927	1274402	1275052	651	b1221	narL	16129184	NP_415739.1		Cytoplasmic	CPR	0
21	219	45.878	43.5612	0.949501	1275045	1276841	1797	b1222	narX	16129185	NP_415740.1	multipass		MPR	0
396	5585	1116.84	1434.13	1.2841	1277180	1278571	1392	b1223	narK	16129186	NP_415741.1	multipass		MPR	1
1922	12043	2015.35	1149.75	0.570495	1279087	1282830	3744	b1224	narG	16129187	NP_415742.1				0
1363	8211	3476.89	1907.05	0.548492	1282827	1284365	1539	b1225	narH	16129188	NP_415743.1				0
383	2318	2114.77	1165.33	0.551042	1284362	1285072	711	b1226	narJ	16129189	NP_415744.1		Cytoplasmic	CPR	0
593	7169	3433.67	3779.49	1.10071	1285072	1285749	678	b1227	narI	16129190	NP_415745.1	multipass		MPR	0
4	67	18.628	28.4087	1.52505	1287005	1287847	843	b1232	purU	16129193	NP_415748.1		Cytoplasmic	CPR	1
8	264	68.4244	205.587	3.00458	1287897	1288355	459	b1233	ychJ	16129194	NP_415749.1				1
100	1414	433.317	557.86	1.28742	1288468	1289373	906	b1234	rssA	226524709	NP_415750.2		Secreted		0
33	581	127.764	204.806	1.603	1289465	1290478	1014	b1235	rssB	16129196	NP_415751.1				0
40	695	172.755	273.291	1.58196	1290680	1291588	909	b1236	galU	16129197	NP_415752.1		Cytoplasmic	CPR	1
259	2230	2456.03	1925.34	0.783927	1291732	1292145	414	b1237	hns	16129198	NP_415753.1		Cytoplasmic	CPR	1
417	3168	611.763	423.158	0.691703	1294669	1297344	2676	b1241	adhE	16129202	NP_415757.1		Cytoplasmic	CPR	1
14	262	84.8177	144.521	1.7039	1297821	1298468	648	b1242	ychE	16129203	NP_415758.1	multipass		MPR	1
598	6745	1438.52	1477.29	1.02695	1299206	1300837	1632	b1243	oppA	16129204	NP_415759.1		Secreted		0
90	2238	383.633	868.569	2.26406	1300923	1301843	921	b1244	oppB	16129205	NP_415760.1	multipass		MPR	0
206	3028	889.686	1190.68	1.33832	1301858	1302766	909	b1245	oppC	16129206	NP_415761.1	multipass		MPR	0
196	2324	758.843	819.223	1.07957	1302778	1303791	1014	b1246	oppD	49176090	YP_025300.1				0
192	2193	750.013	779.968	1.03994	1303788	1304792	1005	b1247	oppF	16129208	NP_415763.1				0
4	109	47.586	118.064	2.48106	1304845	1305174	330	b1248	yciU	90111236	NP_415764.4		Cytoplasmic	CPR	0
20	286	53.7419	69.9713	1.30199	1305209	1306669	1461	b1249	clsA	16129210	NP_415765.1	multipass		MPR	0
17	210	383.56	431.394	1.12471	1306812	1306985	174	b4595	yciY	145698250	YP_001165316.1				1
5	157	15.6533	44.7513	2.85891	1307040	1308293	1254	b1250	kch	16129211	NP_415766.1	multipass		MPR	1
5	81	49.1961	72.5631	1.47498	1309872	1310270	399	b1253	yciA	16129214	NP_415769.1				1
15	416	109.051	275.362	2.52506	1310375	1310914	540	b1254	yciB	16129215	NP_415770.1	multipass		MPR	0
29	526	153.024	252.707	1.65142	1310944	1311687	744	b1255	yciC	16129216	NP_415771.1	multipass		MPR	0
188	3607	1155.02	2017.67	1.74686	1312044	1312682	639	b1256	ompW	16129217	NP_415772.1		Secreted		1
4	116	19.459	51.3793	2.64039	1314440	1315246	807	b1260	trpA	16129221	NP_415776.1		Cytoplasmic	CPR	0
7	86	23.0159	25.7453	1.11859	1315246	1316439	1194	b1261	trpB	16129222	NP_415777.1		Cytoplasmic	CPR	0
16	146	46.2204	38.4005	0.830813	1316451	1317809	1359	b1262	trpC	90111239	NP_415778.2		Cytoplasmic	CPR	0
11	89	48.9618	36.0683	0.736661	1321244	1322125	882	b1266	yciV	16129227	NP_415782.1		Cytoplasmic	CPR	0
14	105	88.5054	60.4368	0.68286	1322122	1322742	621	b1267	yciO	162135901	NP_415783.6		Cytoplasmic	CPR	0
5	99	10.353	18.6638	1.80275	1322770	1324665	1896	b1268	yciQ	16129229	NP_415784.1				0
21	327	94.1128	133.428	1.41775	1324876	1325751	876	b1269	rluB	16129230	NP_415785.1		Cytoplasmic	CPR	1
98	1139	366.413	387.738	1.0582	1327356	1328405	1050	b1272	sohB	16129233	NP_415788.1				1
15	481	233.681	682.258	2.91961	1328441	1328692	252	b1273	yciN	16129234	NP_415789.1				1
44	393	66.4886	54.0701	0.813224	1329072	1331669	2598	b1274	topA	16129235	NP_415790.1		Cytoplasmic	CPR	1
30	506	120.795	185.503	1.53568	1331879	1332853	975	b1275	cysB	16129236	NP_415791.1		Cytoplasmic	CPR	1
125	1064	183.382	142.121	0.775001	1333855	1336530	2676	b1276	acnA	16129237	NP_415792.1		Cytoplasmic	CPR	1
22	390	146.14	235.875	1.61403	1336594	1337184	591	b1277	ribA	16129238	NP_415793.1		Cytoplasmic	CPR	1
15	349	76.9774	163.068	2.11838	1337354	1338118	765	b1278	pgpB	16129239	NP_415794.1	multipass		MPR	1
29	722	368.445	835.185	2.26678	1338267	1338575	309	b1279	yciS	16129240	NP_415795.1	multipass		MPR	0
35	419	117.44	128.007	1.08997	1338582	1339751	1170	b1280	yciM	16129241	NP_415796.1		Cytoplasmic	CPR	0
10	122	53.1958	59.0891	1.11079	1339945	1340682	738	b1281	pyrF	16129242	NP_415797.1		Cytoplasmic	CPR	0
4	20	48.0226	21.8618	0.45524	1340682	1341008	327	b1282	yciH	90111241	NP_415798.2		Cytoplasmic	CPR	0
32	740	573.64	1207.79	2.10549	1341134	1341352	219	b1283	osmB	16129244	NP_415799.1				1
4	53	7.90705	9.53895	1.20639	1342781	1344766	1986	b1285	gmr	16129246	NP_415801.1				1
21	206	42.6061	38.0531	0.893138	1345002	1346936	1935	b1286	rnb	16129247	NP_415802.1		Cytoplasmic	CPR	1
35	349	174.15	158.107	0.907879	1348275	1349063	789	b1288	fabI	16129249	NP_415804.1				1
7	201	77.6298	202.954	2.61438	1349431	1349784	354	b1289	ycjD	16129250	NP_415805.1				1
8	131	31.6282	47.1548	1.49091	1350660	1351652	993	b1291	sapD	16129252	NP_415807.1				0
4	54	17.6245	21.6631	1.22915	1351652	1352542	891	b1292	sapC	16129253	NP_415808.1	multipass		MPR	0
13	172	31.0438	37.3965	1.20464	1353491	1355134	1644	b1294	sapA	16129255	NP_415810.1		Secreted		0
4	51	28.1423	32.6693	1.16086	1359935	1360492	558	b1299	puuR	16129260	NP_415815.1		Cytoplasmic	CPR	0
7	80	28.0991	29.2385	1.04055	1364959	1365936	978	b1303	pspF	90111246	NP_415819.4		Cytoplasmic	CPR	1
25	224	146.706	119.681	0.81579	1366103	1366771	669	b1304	pspA	16129265	NP_415820.1				0
4	25	43.6205	24.8223	0.56905	1367049	1367408	360	b1306	pspC	16129267	NP_415822.1				0
102	1460	1271.23	1656.71	1.30324	1367713	1368027	315	b1308	pspE	16129269	NP_415824.1				0
13	119	36.5065	30.4259	0.833439	1382141	1383538	1398	b1321	ycjX	16129282	NP_415837.1		Cytoplasmic	CPR	0
10	70	36.9666	23.5601	0.637336	1383535	1384596	1062	b1322	ycjF	16129283	NP_415838.1	multipass		MPR	0
109	1387	277.508	321.511	1.15856	1384744	1386285	1542	b1323	tyrR	16129284	NP_415839.1		Cytoplasmic	CPR	1
46	928	356.191	654.25	1.83679	1386329	1386835	507	b1324	tpx	16129285	NP_415840.1		Secreted		1
44	498	178.817	184.271	1.0305	1386954	1387919	966	b1325	ycjG	90111249	NP_415841.4		Cytoplasmic	CPR	1
29	310	156.172	151.998	0.973272	1387894	1388622	729	b1326	mpaA	226524711	NP_415842.2		Cytoplasmic	CPR	0
5	19	21.313	7.37391	0.345982	1388957	1389877	921	b1327	ycjY	221800781	NP_415843.2				0
12	94	29.1885	20.8175	0.713209	1391251	1392864	1614	b1329	mppA	90111250	NP_415845.2		Secreted		1
17	268	258.68	371.295	1.43535	1395389	1395646	258	b1332	ynaJ	16129293	NP_415848.1	multipass		MPR	1
649	6520	2679.15	2450.59	0.914689	1395696	1396646	951	b1333	uspE	16129294	NP_415849.1		Cytoplasmic	CPR	1
34	369	177.263	175.16	0.988139	1396798	1397550	753	b1334	fnr	16129295	NP_415850.1		Cytoplasmic	CPR	1
4	110	30.4329	76.1986	2.50382	1397745	1398260	516	b1335	ogt	16129296	NP_415851.1		Cytoplasmic	CPR	1
8	77	21.7198	19.0338	0.876337	1399834	1401279	1446	b1337	abgB	16129298	NP_415853.1				0
9	83	38.8698	32.6376	0.839665	1402765	1403673	909	b1339	abgR	16129300	NP_415855.1		Cytoplasmic	CPR	1
5	111	34.8036	70.3474	2.02127	1404003	1404566	564	b1340	smrA	16129301	NP_415856.1		Cytoplasmic	CPR	1
7	143	22.2879	41.455	1.85998	1404587	1405819	1233	b1341	ydaM	90111253	NP_415857.2		Cytoplasmic	CPR	1
14	287	55.8556	104.254	1.86648	1406074	1407057	984	b1342	ydaN	16129303	NP_415858.1				1
7	109	20.0007	28.3559	1.41775	1407535	1408908	1374	b1343	dbpA	16129304	NP_415859.1		Cytoplasmic	CPR	1
11	228	46.1371	87.0689	1.88718	1409037	1409972	936	b1344	ttcA	16129305	NP_415860.1		Cytoplasmic	CPR	1
9	117	24.2336	28.6835	1.18362	1421806	1423263	1458	b1363	trkG	16129324	NP_415881.1	multipass		MPR	1
32	582	288.798	478.231	1.65594	1433209	1433643	435	b1376	uspF	90111262	NP_415894.4		Cytoplasmic	CPR	1
103	1291	114.713	130.909	1.14119	1435284	1438808	3525	b1378	ydbK	16129339	NP_415896.1				1
151	3445	2220.24	4611.92	2.07722	1439082	1439348	267	b4529	ydbJ	94541111	YP_588453.1				1
40	788	371.239	665.871	1.79365	1439345	1439767	423	b1379	hslJ	16129340	NP_415897.1				1
15	123	59.4826	44.4093	0.746594	1439878	1440867	990	b1380	ldhA	16129341	NP_415898.1		Cytoplasmic	CPR	1
8	131	11.8965	17.7366	1.49091	1441075	1443714	2640	b1381	ydbH	16129342	NP_415899.1				0
4	34	48.0226	37.1651	0.773908	1443904	1444230	327	b1383	ydbL	90111263	NP_415901.2				0
9	187	23.5551	44.5609	1.89178	1445543	1447042	1500	b1385	feaB	90111264	NP_415903.4		Cytoplasmic	CPR	1
7	69	20.914	18.7697	0.897473	1460149	1461462	1314	b1398	paaK	16129359	NP_415916.1		Cytoplasmic	CPR	0
7	122	28.8969	45.8546	1.58684	1461563	1462513	951	b1399	paaX	16129360	NP_415917.1				0
5	129	33.2136	78.02	2.34904	1462495	1463085	591	b1400	paaY	16129361	NP_415918.1		Cytoplasmic	CPR	0
5	48	7.81108	6.82736	0.874061	1463416	1465928	2513	b4492	N/A	N/A	N/A				1
83	1162	378.45	482.4	1.27467	1472245	1473105	861	b1406	ydbC	16129367	NP_415924.1		Cytoplasmic	CPR	1
4	60	6.80685	9.29625	1.36572	1473168	1475474	2307	b1407	ydbD	90111266	NP_415925.2				1
4	34	8.93253	6.91296	0.773908	1477162	1478919	1758	b1410	ynbC	16129371	NP_415928.1		Cytoplasmic	CPR	0
48	602	48.281	55.1318	1.14189	1481085	1484987	3903	b1413	hrpA	145698255	NP_415931.4		Cytoplasmic	CPR	1
27	252	73.6097	62.5521	0.849781	1486256	1487695	1440	b1415	aldA	16129376	NP_415933.1		Cytoplasmic	CPR	1
20	369	311.575	523.395	1.67984	1487737	1487988	252	b4493	N/A	N/A	N/A				1
5	130	36.9666	87.509	2.36725	1488926	1489456	531	b1418	cybB	90111268	NP_415935.2	multipass		MPR	1
10	248	225.623	509.456	2.25799	1489701	1489874	174	b1419	ydcA	16129378	NP_415936.1				1
24	137	628.136	326.462	0.519732	1489946	1490095	150	b4428	hokB	49176107	YP_025301.1		Secreted		1
9	80	21.5312	17.4255	0.809316	1490494	1492134	1641	b1421	trg	16129380	NP_415938.1	multipass		MPR	1
16	307	67.9801	118.76	1.74698	1492172	1493095	924	b1422	ydcI	90111269	NP_415939.2		Cytoplasmic	CPR	1
37	361	108.078	96.009	0.888333	1493312	1494655	1344	b1423	ydcJ	16129382	NP_415940.1		Cytoplasmic	CPR	1
10	153	23.7068	33.0244	1.39303	1494880	1496535	1656	b1424	mdoD	145698256	NP_415941.5		Secreted		1
45	1140	785.17	1811.03	2.30655	1496675	1496899	225	b1426	ydcH	90111271	NP_415943.4				1
16	345	116.321	228.365	1.96322	1496962	1497501	540	b1427	rimL	16129386	NP_415944.1		Cytoplasmic	CPR	1
5	78	20.0094	28.4204	1.42035	1497493	1498473	981	b1428	ydcK	16129387	NP_415945.1		Cytoplasmic	CPR	1
20	263	79.0705	94.6696	1.19728	1498597	1499589	993	b1429	tehA	16129388	NP_415946.1	multipass		MPR	0
10	93	66.0917	55.9629	0.846746	1499586	1500179	594	b1430	tehB	16129389	NP_415947.1		Cytoplasmic	CPR	0
11	154	64.5506	82.2808	1.27467	1500481	1501149	669	b1431	ydcL	16129390	NP_415948.1				1
8	137	25.9775	40.504	1.5592	1501681	1502889	1209	b1432	ydcM	16129391	NP_415949.1				1
4	73	8.00377	13.2993	1.66163	1504805	1506766	1962	b1435	ydcP	90111273	NP_415952.2		Cytoplasmic	CPR	1
40	425	137.028	132.559	0.967385	1509678	1510823	1146	b1440	ydcS	16129399	NP_415957.1		Secreted		0
43	649	166.481	228.776	1.37419	1510841	1511854	1014	b1441	ydcT	16129400	NP_415958.1				0
22	547	91.6865	207.558	2.26378	1511855	1512796	942	b1442	ydcU	16129401	NP_415959.1	multipass		MPR	0
41	604	202.465	271.565	1.34129	1512786	1513580	795	b1443	ydcV	16129402	NP_415960.1	multipass		MPR	0
139	1239	382.942	310.785	0.811572	1513602	1515026	1425	b1444	patD	16129403	NP_415961.1		Cytoplasmic	CPR	0
7	157	286.26	584.564	2.04208	1515123	1515218	96	b4598	yncL	145698258	YP_001165318.1				1
15	134	251.657	204.688	0.813362	1515672	1515905	234	b1446	ydcY	16129405	NP_415963.1				1
4	171	34.8964	135.827	3.8923	1515906	1516355	450	b1447	ydcZ	16129406	NP_415964.1	multipass		MPR	0
4	128	30.257	88.1549	2.91354	1516352	1516870	519	b1448	mnaT	16129407	NP_415965.1		Cytoplasmic	CPR	0
62	717	234.492	246.903	1.05293	1517051	1518088	1038	b1449	curA	226524714	NP_415966.6		Cytoplasmic	CPR	1
5	42	34.4373	26.3377	0.764803	1531306	1531875	570	b1462	yddH	90111278	NP_415979.2				1
6	128	27.8429	54.0809	1.94236	1532048	1532893	846	b1463	nhoA	16129422	NP_415980.1		Cytoplasmic	CPR	1
14	159	61.4786	63.5717	1.03405	1532989	1533882	894	b1464	yddE	16129423	NP_415981.1		Cytoplasmic	CPR	1
4	31	22.5623	15.9205	0.705622	1534638	1535333	696	b1466	narW	16129425	NP_415983.1		Cytoplasmic	CPR	0
16	86	16.7906	8.21703	0.489383	1536874	1540614	3741	b1468	narZ	16129427	NP_415985.1				0
4	34	11.3055	8.74945	0.773908	1540696	1542084	1389	b1469	narU	16129428	NP_415986.1	multipass		MPR	1
116	744	149.409	87.2493	0.583963	1545425	1548472	3048	b1474	fdnG	16129433	NP_415991.1		Secreted		0
73	236	323.827	95.3175	0.294347	1548485	1549369	885	b1475	fdnH	16129434	NP_415992.1				0
94	540	564.266	295.135	0.523042	1549362	1550015	654	b1476	fdnI	16129435	NP_415993.1	multipass		MPR	0
10	94	137.749	117.893	0.855851	1550422	1550706	285	b1477	yddM	145698261	NP_415994.4				1
18	149	69.8964	52.6792	0.753675	1550852	1551862	1011	b1478	adhP	90111280	NP_415995.4		Cytoplasmic	CPR	1
61	663	141.035	139.566	0.989587	1551996	1553693	1698	b1479	maeA	90111281	NP_415996.2				1
37	239	1052.58	619.046	0.588121	1553850	1553987	138	b1480	sra	16129439	NP_415997.1		Cytoplasmic	CPR	0
12	144	109.051	119.147	1.09258	1554649	1555080	432	b1482	osmC	16129441	NP_415999.1		Cytoplasmic	CPR	1
4	21	6.54308	3.12761	0.478002	1561358	1563757	2400	b1489	dosP	162135902	NP_416006.4				0
250	3283	638.973	763.983	1.19564	1566978	1568513	1536	b1492	gadC	16129451	NP_416009.1	multipass		MPR	0
77	993	215.768	253.347	1.17416	1568669	1570069	1401	b1493	gadB	16129452	NP_416010.1		Cytoplasmic	CPR	0
44	246	31.8586	16.2173	0.509041	1590689	1596110	5422	b4696	N/A	N/A	N/A				1
20	274	49.2887	61.4807	1.24736	1596641	1598233	1593	b1511	lsrK	49176118	NP_416028.3		Cytoplasmic	CPR	0
25	238	102.879	89.1728	0.866777	1598312	1599265	954	b1512	lsrR	16129471	NP_416029.1				0
5	65	12.7795	15.1261	1.18362	1599514	1601049	1536	b1513	lsrA	16129472	NP_416030.1				0
10	154	38.1521	53.4945	1.40214	1601043	1602071	1029	b1514	lsrC	16129473	NP_416031.1	multipass		MPR	0
11	92	43.4888	33.1164	0.761492	1602071	1603063	993	b1515	lsrD	16129474	NP_416032.1	multipass		MPR	0
19	140	72.9141	48.9166	0.67088	1603075	1604097	1023	b1516	lsrB	16129475	NP_416033.1		Secreted		0
19	204	85.1497	83.2396	0.977568	1604124	1604999	876	b1517	lsrF	16129476	NP_416034.1				0
8	55	107.927	67.5575	0.625955	1605023	1605313	291	b1518	lsrG	16129477	NP_416035.1				0
10	178	51.724	83.8267	1.62065	1605370	1606128	759	b1519	tam	16129478	NP_416036.1		Cytoplasmic	CPR	0
116	1143	313.635	281.374	0.897137	1607253	1608704	1452	b1521	uxaB	49176119	YP_025302.1		Cytoplasmic	CPR	1
16	308	66.259	116.131	1.75267	1608931	1609878	948	b1522	yneF	16129481	NP_416039.1	multipass		MPR	1
10	202	109.051	200.564	1.83917	1609990	1610349	360	b1523	yneG	16129482	NP_416040.1				0
5	70	21.175	26.9912	1.27467	1610349	1611275	927	b1524	yneH	16129483	NP_416041.1				0
5	76	14.1319	19.5576	1.38393	1611339	1612727	1389	b1525	sad	90111288	NP_416042.2		Cytoplasmic	CPR	1
8	100	26.3701	30.0118	1.1381	1615052	1616242	1191	b1528	ydeA	16129487	NP_416045.1				1
16	262	94.3147	140.615	1.49091	1616267	1616932	666	b1529	marC	16129488	NP_416046.1	multipass		MPR	1
4	11	71.705	17.9536	0.250382	1618013	1618231	219	b1532	marB	16129491	NP_416049.1				0
11	160	47.9826	63.545	1.32433	1618262	1619161	900	b1533	eamA	90111291	NP_416050.4	multipass		MPR	1
31	380	59.4826	66.3868	1.11607	1623359	1625404	2046	b1538	dcp	16129497	NP_416056.1		Cytoplasmic	CPR	1
45	428	236.497	204.799	0.865968	1625541	1626287	747	b1539	ydfG	16129498	NP_416057.1		Cytoplasmic	CPR	1
9	257	51.4303	133.715	2.59993	1626376	1627062	687	b1540	ydfH	16129499	NP_416058.1		Cytoplasmic	CPR	1
5	39	112.812	80.116	0.710174	1635633	1635806	174	b1550	gnsB	90111293	NP_416068.2				1
25	799	460.78	1340.82	2.90989	1636479	1636691	213	b1552	cspI	16129511	NP_416070.1		Cytoplasmic	csp	1
5	25	76.9774	35.0432	0.45524	1637104	1637358	255	b4689	N/A	226524715	YP_002791241.1				0
123	2973	2235.55	4919.77	2.2007	1639363	1639578	216	b1557	cspB	16129516	NP_416075.1		Cytoplasmic	csp	1
4	29	20.8544	13.766	0.660098	1640513	1641265	753	b1559	ydfT	90111296	NP_416077.4		Cytoplasmic	CPR	0
17	71	427.817	162.681	0.380259	1643143	1643298	156	b1562	hokD	16129521	NP_416080.1		Secreted		1
40	296	545.257	367.37	0.673755	1643370	1643657	288	b1563	relE	16129522	NP_416081.1		Cytoplasmic	CPR	0
5	53	81.7885	78.9348	0.965109	1643657	1643896	240	b1564	relB	16129523	NP_416082.1		Cytoplasmic	CPR	0
6	144	57.7331	126.156	2.18515	1645958	1646365	408	b1570	dicA	16129529	NP_416088.1		Cytoplasmic	CPR	1
6	87	1.15139	1.52006	1.3202	1630310	1650767	20458	b4600	N/A	N/A	N/A				1
4	41	48.0226	44.8167	0.933242	1653371	1653697	327	b1582	ynfA	16129540	NP_416099.1	multipass		MPR	1
11	137	126.27	143.185	1.13396	1653832	1654173	342	b1583	ynfB	16129541	NP_416100.1				0
11	248	76.9774	158.013	2.05272	1654208	1654768	561	b1584	speG	16129542	NP_416101.1		Cytoplasmic	CPR	0
5	27	64.1479	31.5389	0.491659	1655589	1655894	306	b1586	ynfD	90111300	NP_416103.2		Secreted		1
99	1359	160.14	200.149	1.24984	1656093	1658519	2427	b1587	ynfE	16129545	NP_416104.1				0
108	1366	174.914	201.429	1.15159	1658580	1661003	2424	b1588	ynfF	171701681	NP_416105.4				0
24	270	152.46	156.163	1.02429	1661014	1661631	618	b1589	ynfG	16129547	NP_416106.1				0
42	704	192.849	294.314	1.52614	1661633	1662487	855	b1590	ynfH	16129548	NP_416107.1	multipass		MPR	0
16	419	102.136	243.525	2.38432	1662530	1663144	615	b1591	dmsD	90111302	NP_416108.2				0
4	52	12.4928	14.7867	1.18362	1663339	1664595	1257	b1592	clcB	90111303	NP_416109.2	multipass		MPR	1
57	970	321.513	498.157	1.54941	1664548	1665243	696	b1593	ynfK	90111304	NP_416110.4		Cytoplasmic	CPR	1
21	348	67.5207	101.875	1.5088	1665368	1666588	1221	b1594	mlc	16129552	NP_416111.1		Cytoplasmic	CPR	1
11	130	34.4373	37.0553	1.07602	1667723	1668976	1254	b1596	ynfM	16129554	NP_416113.1	multipass		MPR	1
32	414	152.831	180.025	1.17793	1669984	1670805	822	b1598	ydgD	16129556	NP_416115.1				1
21	416	79.6549	143.667	1.80362	1671937	1672971	1035	b1601	tqsA	16129559	NP_416118.1	multipass		MPR	1
95	1055	268.507	271.49	1.01111	1672996	1674384	1389	b1602	pntB	16129560	NP_416119.1	multipass		MPR	0
80	908	204.871	211.713	1.03339	1674395	1675927	1533	b1603	pntA	16129561	NP_416120.1	multipass		MPR	0
12	159	49.852	60.1408	1.20639	1676451	1677395	945	b1604	ydgH	16129562	NP_416121.1				1
5	75	15.0762	20.5899	1.36572	1680906	1682207	1302	b1609	rstB	16129567	NP_416126.1	multipass		MPR	0
6	142	25.3281	54.577	2.1548	1682283	1683212	930	b1610	tus	16129568	NP_416127.1		Cytoplasmic	CPR	1
56	715	156.587	182.03	1.16249	1683209	1684612	1404	b1611	fumC	16129569	NP_416128.1		Cytoplasmic	CPR	1
193	1810	460.042	392.816	0.85387	1684755	1686401	1647	b1612	fumA	16129570	NP_416129.1		Cytoplasmic	CPR	1
53	544	176.93	165.347	0.93453	1686600	1687775	1176	b1613	manA	49176125	NP_416130.3		Secreted		1
100	1025	260.162	242.794	0.933242	1687876	1689384	1509	b1614	ydgA	16129572	NP_416131.1				1
4	63	8.66633	12.4276	1.43401	1692284	1694095	1812	b1617	uidA	16129575	NP_416134.1		Cytoplasmic	CPR	0
64	702	425.134	424.574	0.998683	1694486	1695076	591	b1618	uidR	16129576	NP_416135.1				1
44	439	167.869	152.494	0.908411	1696176	1697204	1029	b1620	malI	16129578	NP_416137.1		Cytoplasmic	CPR	1
11	195	27.1088	43.7545	1.61403	1697379	1698971	1593	b1621	malX	16129579	NP_416138.1	multipass		MPR	0
28	267	93.7116	81.3612	0.868208	1698981	1700153	1173	b1622	malY	16129580	NP_416139.1		Cytoplasmic	CPR	0
32	234	125.376	83.4742	0.665789	1700257	1701258	1002	b1623	add	16129581	NP_416140.1		Cytoplasmic	CPR	1
20	224	75.4246	76.9133	1.01974	1701292	1702332	1041	b1624	ydgJ	90111307	NP_416141.4		Cytoplasmic	CPR	1
6	144	186.945	408.504	2.18515	1702575	1702700	126	b4409	blr	49176127	YP_025303.1				1
5	52	8.83007	8.36119	0.946899	1704943	1707165	2223	b1629	rsxC	16129587	NP_416146.1		Secreted		0
10	56	63.2182	32.233	0.509869	1708228	1708848	621	b1631	rsxG	16129589	NP_416148.1				0
5	53	30.8636	29.7867	0.965109	1709547	1710182	636	b1633	nth	16129591	NP_416150.1		Cytoplasmic	CPR	0
20	110	52.2402	26.16	0.500764	1710793	1712295	1503	b1634	tppB	16129592	NP_416151.1				1
21	305	136.044	179.9	1.32236	1712401	1713006	606	b1635	gstA	16129593	NP_416152.1		Cytoplasmic	CPR	1
16	282	72.7009	116.665	1.60472	1713050	1713913	864	b1636	pdxY	16129594	NP_416153.1		Cytoplasmic	CPR	0
72	530	221.695	148.583	0.670214	1713972	1715246	1275	b1637	tyrS	16129595	NP_416154.1		Cytoplasmic	CPR	0
18	153	107.557	83.2396	0.773908	1715375	1716031	657	b1638	pdxH	16129596	NP_416155.1		Cytoplasmic	CPR	0
23	184	81.3464	59.2514	0.728384	1716517	1717626	1110	b1640	anmK	16129598	NP_416157.1				1
590	11736	4949.25	8963.51	1.81108	1717900	1718367	468	b1641	slyB	49176129	YP_025304.1		Secreted		1
54	956	487.347	785.548	1.61189	1718414	1718848	435	b1642	slyA	90111310	NP_416159.2		Cytoplasmic	CPR	1
4	30	18.3023	12.4979	0.68286	1719288	1720145	858	b1644	ydhJ	90111311	NP_416161.4				0
9	130	17.5522	23.0836	1.31514	1720145	1722157	2013	b1645	ydhK	16129603	NP_416162.1	multipass		MPR	0
31	446	233.144	305.4	1.30992	1722158	1722679	522	b1646	sodC	16129604	NP_416163.1		Secreted		1
110	1085	481.431	432.356	0.898064	1722760	1723656	897	b1647	ydhF	49176131	YP_025305.1		Cytoplasmic	CPR	1
14	96	50.0564	31.2516	0.624329	1724683	1725780	1098	b1650	nemA	16129608	NP_416167.1		Cytoplasmic	CPR	0
16	238	153.955	208.507	1.35434	1725861	1726268	408	b1651	gloA	16129609	NP_416168.1		Cytoplasmic	CPR	0
13	210	11.0539	16.2579	1.47078	1727111	1731727	4617	b1653	lhr	16129611	NP_416170.1				0
76	1117	857.369	1147.3	1.33817	1731778	1732125	348	b1654	grxD	16129612	NP_416171.1				1
4	75	19.2444	32.853	1.70715	1732459	1733274	816	b1655	mepH	16129613	NP_416172.1				1
485	3032	3271.54	1862.13	0.569191	1733402	1733983	582	b1656	sodB	16129614	NP_416173.1		Secreted		1
22	268	73.8194	81.8753	1.10913	1734145	1735314	1170	b1657	ydhP	16129615	NP_416174.1	multipass		MPR	1
6	79	261.723	313.753	1.1988	1735480	1735569	90	b4602	ynhF	145698270	YP_001165321.1				1
6	241	22.9582	83.9602	3.65709	1735868	1736893	1026	b1658	purR	16129616	NP_416175.1		Cytoplasmic	CPR	1
4	73	16.8311	27.967	1.66163	1736890	1737822	933	b1659	ydhB	16129617	NP_416176.1		Cytoplasmic	CPR	1
62	1057	211.839	328.821	1.55222	1739437	1740585	1149	b1661	cfa	16129619	NP_416178.1		Cytoplasmic	CPR	1
15	205	91.7254	114.136	1.24432	1740625	1741266	642	b1662	ribC	16129620	NP_416179.1		Cytoplasmic	CPR	1
43	363	122.861	94.433	0.768615	1741481	1742854	1374	b1663	mdtK	49176133	YP_025307.1	multipass		MPR	1
74	1288	231.116	366.256	1.58473	1742895	1744151	1257	b1664	ydhQ	16129622	NP_416181.1				1
20	198	256.591	231.285	0.901375	1744724	1745029	306	b1667	ydhR	16129623	NP_416182.1				1
14	197	34.2442	43.8728	1.28118	1745155	1746759	1605	b1668	ydhS	16129624	NP_416183.1		Cytoplasmic	CPR	1
6	124	28.9731	54.5174	1.88166	1746771	1747583	813	b1669	ydhT	16129625	NP_416184.1				0
7	209	34.963	95.0447	2.71843	1747587	1748372	786	b1670	ydhU	16129626	NP_416185.1	multipass		MPR	0
7	110	41.0776	58.772	1.43075	1748369	1749037	669	b1671	ydhX	226524717	NP_416186.4				0
17	175	102.993	96.531	0.937259	1749101	1749748	648	b1672	ydhW	16129628	NP_416187.1		Cytoplasmic	CPR	0
18	337	33.6021	57.2789	1.70462	1749752	1751854	2103	b1673	ydhV	16129629	NP_416188.1		Cytoplasmic	CPR	0
15	150	93.9198	85.5121	0.91048	1751875	1752501	627	b1674	ydhY	16129630	NP_416189.1				0
49	497	136.141	125.724	0.923487	1753722	1755134	1413	b1676	pykF	16129632	NP_416191.1		Cytoplasmic	CPR	1
3223	13260	53388.2	19998.6	0.374588	1755445	1755681	237	b1677	lpp	16129633	NP_416192.1		Secreted		1
65	831	253.911	295.555	1.16401	1755745	1756749	1005	b1678	ynhG	16129634	NP_416193.1		Secreted		1
13	199	122.389	170.577	1.39373	1756898	1757314	417	b1679	sufE	16129635	NP_416194.1		Cytoplasmic	CPR	0
82	736	263.652	215.46	0.817211	1757327	1758547	1221	b1680	sufS	16129636	NP_416195.1		Cytoplasmic	CPR	0
66	550	203.7	154.554	0.758733	1758544	1759815	1272	b1681	sufD	16129637	NP_416196.1		Cytoplasmic	CPR	0
35	350	183.942	167.476	0.91048	1759790	1760536	747	b1682	sufC	16129638	NP_416197.1		Cytoplasmic	CPR	0
58	589	153.024	141.487	0.924608	1760546	1762033	1488	b1683	sufB	90111315	NP_416198.2				0
9	142	95.7524	137.552	1.43654	1762042	1762410	369	b1684	sufA	16129640	NP_416199.1		Cytoplasmic	CPR	0
12	121	249.26	228.838	0.918067	1762958	1763146	189	b1685	ydiH	226524718	NP_416200.2				0
13	126	124.175	109.58	0.882465	1763246	1763656	411	b1686	menI	16129642	NP_416201.1		Cytoplasmic	CPR	0
46	419	59.0739	48.9917	0.829329	1763653	1766709	3057	b1687	ydiJ	16129643	NP_416202.1		Cytoplasmic	CPR	0
20	279	70.5453	89.601	1.27012	1767098	1768210	1113	b1688	ydiK	16129644	NP_416203.1	multipass		MPR	1
4	6	18.1123	2.47364	0.136572	1771813	1772679	867	b1692	ydiB	16129648	NP_416207.1		Cytoplasmic	CPR	0
88	732	145.218	109.982	0.757354	1782758	1785136	2379	b1702	ppsA	16129658	NP_416217.1		Cytoplasmic	CPR	1
43	446	117.475	110.938	0.944358	1787832	1789268	1437	b1706	ydiU	16129662	NP_416221.1				1
4	72	21.9935	36.0444	1.63886	1789331	1790044	714	b1707	ydiV	16129663	NP_416222.1				1
18	124	151.968	95.3175	0.62722	1790291	1790755	465	b1708	nlpC	16129664	NP_416223.1				1
6	77	42.6723	49.8604	1.16845	1791582	1792133	552	b1710	btuE	16129666	NP_416225.1		Secreted		0
8	119	32.0151	43.3593	1.35434	1792196	1793176	981	b1711	btuC	16129667	NP_416226.1	multipass		MPR	0
213	3793	2787.35	4519.24	1.62134	1793277	1793576	300	b1712	ihfA	16129668	NP_416227.1		Cytoplasmic	CPR	1
204	2089	335.374	312.686	0.932349	1793581	1795968	2388	b1713	pheT	16129669	NP_416228.1		Cytoplasmic	CPR	0
27	193	107.721	70.1078	0.650825	1795983	1796966	984	b1714	pheS	16129670	NP_416229.1		Cytoplasmic	CPR	0
113	438	1242.64	438.541	0.352912	1797417	1797773	357	b1716	rplT	16129672	NP_416231.1		Cytoplasmic	CPR	0
72	341	1427.58	615.592	0.431213	1797826	1798023	198	b1717	rpmI	49176137	NP_416232.3		Cytoplasmic	CPR	0
430	2986	3108.87	1965.59	0.632254	1798120	1798662	543	b1718	infC	16129674	NP_416233.1		Cytoplasmic	CPR	0
530	5812	1078.64	1076.95	0.998436	1798666	1800594	1929	b1719	thrS	16129675	NP_416234.1		Cytoplasmic	CPR	0
4	96	20.6896	45.2099	2.18515	1803349	1804107	759	b1722	ydiY	16129676	NP_416236.1				1
31	263	130.862	101.083	0.77244	1804394	1805323	930	b1723	pfkB	49176138	NP_416237.3		Cytoplasmic	CPR	1
8	94	107.927	115.462	1.06981	1805424	1805714	291	b1724	ydiZ	16129678	NP_416238.1				1
170	2660	775.139	1104.29	1.42463	1805820	1806680	861	b1725	yniA	16129679	NP_416239.1				1
18	395	131.593	262.922	1.998	1806721	1807257	537	b1726	yniB	16129680	NP_416240.1	multipass		MPR	1
7	104	41.0776	55.5663	1.35271	1807404	1808072	669	b1727	yniC	16129681	NP_416241.1		Cytoplasmic	CPR	1
24	201	67.687	51.6132	0.762527	1808958	1810349	1392	b1729	ydjN	16129683	NP_416243.1	multipass		MPR	1
10	160	52.3446	76.254	1.45677	1814410	1815159	750	b1733	chbG	16129687	NP_416247.1		Cytoplasmic	CPR	0
6	70	27.942	29.6807	1.06223	1816629	1817471	843	b1735	chbR	16129689	NP_416249.1				0
13	407	158.991	453.204	2.8505	1819323	1819643	321	b1738	chbB	16129692	NP_416252.1		Cytoplasmic	CPR	1
97	1634	1123.33	1722.89	1.53374	1819942	1820280	339	b1739	osmE	16129693	NP_416253.1				1
39	336	184.913	145.048	0.784414	1820482	1821309	828	b1740	nadE	16129694	NP_416254.1		Cytoplasmic	CPR	1
9	131	39.789	52.7306	1.32525	1821539	1822426	888	b1741	cho	16129695	NP_416255.1		Cytoplasmic	CPR	1
6	53	48.4673	38.9802	0.804257	1823164	1823649	486	b1743	spy	16129697	NP_416257.1		Secreted		1
5	26	14.6051	6.91478	0.47345	1824940	1826283	1344	b1745	astB	16129699	NP_416259.1		Cytoplasmic	CPR	0
12	69	58.3769	30.5618	0.523526	1830452	1831258	807	b1749	xthA	16129703	NP_416263.1		Cytoplasmic	CPR	1
10	82	57.9034	43.2303	0.746594	1832140	1832817	678	b1751	ydjY	90111322	NP_416265.4				0
7	77	38.8149	38.8742	1.00153	1832832	1833539	708	b1752	ydjZ	16129706	NP_416266.1	multipass		MPR	0
4	45	28.6036	29.2984	1.02429	1833539	1834087	549	b1753	ynjA	16129707	NP_416267.1				0
4	46	13.4562	14.0893	1.04705	1834097	1835263	1167	b1754	ynjB	90111323	NP_416268.2				0
35	290	105.049	79.2491	0.754398	1837491	1838798	1308	b1757	ynjE	90111324	NP_416271.4		Secreted		1
12	387	75.8618	222.753	2.9363	1838807	1839427	621	b1758	ynjF	90111325	NP_416272.2	multipass		MPR	1
12	114	35.0522	30.3186	0.864956	1840395	1841738	1344	b1761	gdhA	16129715	NP_416275.1		Secreted		1
101	613	202.095	111.677	0.552598	1843023	1844984	1962	b1763	topB	16129717	NP_416277.1		Cytoplasmic	CPR	0
134	1400	503.892	479.327	0.951248	1844989	1846032	1044	b1764	selD	16129718	NP_416278.1		Cytoplasmic	CPR	0
49	682	348.49	441.621	1.26724	1846149	1846700	552	b1765	ydjA	16129719	NP_416279.1				0
25	329	52.852	63.3269	1.19819	1846861	1848717	1857	b1766	sppA	16129720	NP_416280.1				1
4	38	15.4409	13.3557	0.864956	1848884	1849900	1017	b1767	ansA	16129721	NP_416281.1		Cytoplasmic	CPR	0
11	133	67.2653	74.0492	1.10085	1849911	1850552	642	b1768	pncA	90111327	NP_416282.4		Cytoplasmic	CPR	0
48	499	690.259	653.344	0.94652	1859726	1859998	273	b1777	yeaC	90111329	NP_416291.4				1
106	2029	1005.17	1751.8	1.7428	1860040	1860453	414	b1778	msrB	16129732	NP_416292.1		Cytoplasmic	CPR	1
1366	5667	5384.25	2033.75	0.377723	1860795	1861790	996	b1779	gapA	16129733	NP_416293.1		Cytoplasmic	CPR	1
14	174	62.1038	70.2765	1.1316	1861874	1862758	885	b1780	yeaD	90111330	NP_416294.4		Cytoplasmic	CPR	1
14	291	64.2829	121.655	1.8925	1862806	1863660	855	b1781	yeaE	16129735	NP_416295.1		Cytoplasmic	CPR	1
10	140	52.5549	66.9902	1.27467	1863750	1864496	747	b1782	mipA	16129736	NP_416296.1		Secreted		1
243	2066	493.014	381.64	0.774095	1864932	1866866	1935	b1783	yeaG	16129737	NP_416297.1		Cytoplasmic	CPR	0
60	703	183.451	195.702	1.06678	1866979	1868262	1284	b1784	yeaH	16129738	NP_416298.1		Cytoplasmic	CPR	0
6	139	46.7363	98.5799	2.10928	1871598	1872101	504	b1787	yeaK	16129741	NP_416301.1		Cytoplasmic	CPR	1
15	238	71.6396	103.493	1.44463	1872779	1873600	822	b1790	yeaM	16129744	NP_416304.1		Cytoplasmic	CPR	1
19	330	214.342	338.952	1.58136	1874933	1875280	348	b1792	yeaO	90111333	NP_416306.2				1
7	93	26.7845	32.3996	1.20964	1875739	1876764	1026	b1794	yeaP	90111334	NP_416308.4				1
47	1344	741.024	1929.32	2.60359	1877031	1877279	249	b1795	yeaQ	16129749	NP_416309.1	multipass		MPR	1
54	846	229.433	327.267	1.42642	1878910	1879833	924	b1799	dmlR	90111335	NP_416313.4				1
11	178	39.7646	58.586	1.47332	1879936	1881021	1086	b1800	dmlA	16129754	NP_416314.1		Cytoplasmic	CPR	1
14	225	48.7251	71.298	1.46327	1884888	1886015	1128	b1804	rnd	16129758	NP_416318.1		Cytoplasmic	CPR	1
20	329	46.57	69.7497	1.49774	1886085	1887770	1686	b1805	fadD	16129759	NP_416319.1		Cytoplasmic	CPR	1
45	972	303.545	596.963	1.96664	1887975	1888556	582	b1806	yeaY	16129760	NP_416320.1		Secreted		1
25	208	51.3586	38.9051	0.757519	1889349	1891259	1911	b1808	yoaA	16129762	NP_416322.1		Cytoplasmic	CPR	1
10	165	113.793	170.95	1.50229	1891391	1891735	345	b1809	yoaB	90111336	NP_416323.4		Cytoplasmic	CPR	1
5	132	65.4308	157.274	2.40367	1892157	1892456	300	b1810	yoaC	226524724	NP_416324.2				1
9	123	196.292	244.251	1.24432	1892576	1892755	180	b1811	yoaH	16129765	NP_416325.1				1
7	73	20.1769	19.158	0.949501	1892829	1894190	1362	b1812	pabB	16129766	NP_416326.1		Cytoplasmic	CPR	0
97	870	278.98	227.819	0.816616	1894956	1896320	1365	b1814	sdaA	16129768	NP_416328.1		Cytoplasmic	CPR	1
17	161	42.8641	36.9608	0.862278	1898053	1899609	1557	b1816	yoaE	16129770	NP_416330.1	multipass		MPR	1
684	6148	2762.63	2260.85	0.818367	1900072	1901043	972	b1817	manX	16129771	NP_416331.1		Cytoplasmic	CPR	0
405	3033	1984.98	1353.46	0.681848	1901106	1901906	801	b1818	manY	16129772	NP_416332.1	multipass		MPR	0
855	7871	3898.49	3267.61	0.838174	1901910	1902770	861	b1819	manZ	49176154	NP_416333.3				0
16	159	136.849	123.819	0.90479	1902825	1903283	459	b1820	yobD	16129774	NP_416334.1	multipass		MPR	1
8	124	38.7738	54.7193	1.41124	1904275	1905084	810	b1822	rlmA	16129776	NP_416336.1		Cytoplasmic	CPR	1
329	4278	6150.5	7281.58	1.1839	1905250	1905459	210	b1823	cspC	16129777	NP_416337.1		Cytoplasmic	csp	0
276	3933	7524.54	9762.6	1.29743	1905472	1905615	144	b1824	yobF	16129778	NP_416338.1				0
47	1422	640.677	1764.86	2.75469	1906285	1906572	288	b1825	yebO	16129779	NP_416339.1				1
54	1410	1472.19	3499.94	2.37736	1906647	1906790	144	b1826	mgrB	16129780	NP_416340.1				1
24	351	118.965	158.411	1.33158	1907332	1908123	792	b1827	kdgR	16129781	NP_416341.1		Cytoplasmic	CPR	1
37	461	164.69	186.826	1.13441	1909719	1910600	882	b1829	htpX	16129783	NP_416343.1	multipass		MPR	1
67	672	128.371	117.228	0.913198	1910792	1912840	2049	b1830	prc	16129784	NP_416344.1				0
40	362	224.655	185.112	0.823984	1912860	1913558	699	b1831	proQ	49176156	YP_026161.1		Cytoplasmic	CPR	0
14	223	110.365	160.059	1.45026	1913655	1914152	498	b1832	msrC	171701682	NP_416346.4				1
11	262	33.6327	72.9357	2.1686	1914282	1915565	1284	b1833	yebS	16129786	NP_416347.1	multipass		MPR	0
19	194	28.3186	26.3263	0.929648	1915534	1918167	2634	b1834	yebT	90111340	NP_416348.2				0
4	38	10.9051	9.43246	0.864956	1918247	1919686	1440	b1835	rsmF	90111341	NP_416349.2		Cytoplasmic	CPR	1
14	140	231.907	211.146	0.91048	1919804	1920040	237	b1836	yebV	90111342	NP_416350.4				1
6	170	122.683	316.484	2.57969	1920145	1920336	192	b1837	yebW	90111343	NP_416351.2				1
12	130	71.705	70.7265	0.986353	1920337	1920993	657	b1838	pphA	90111344	NP_416352.4		Cytoplasmic	CPR	1
16	252	183.665	263.377	1.43401	1921389	1921730	342	b1839	yebY	16129792	NP_416353.1				0
27	542	121.418	221.916	1.8277	1921743	1922615	873	b1840	yebZ	16129793	NP_416354.1	multipass		MPR	0
12	198	125.627	188.729	1.50229	1922619	1922993	375	b1841	yobA	16129794	NP_416355.1		Secreted		0
8	75	47.8033	40.8037	0.853575	1923464	1924120	657	b1843	yobB	16129796	NP_416357.1				0
16	243	30.4772	42.1437	1.38279	1924803	1926863	2061	b1845	ptrB	16129798	NP_416359.1				1
20	242	118.965	131.062	1.10168	1927072	1927731	660	b1846	yebE	16129799	NP_416360.1				1
20	396	219.935	396.489	1.80275	1928058	1928414	357	b1847	yebF	145698278	NP_416361.2		Secreted		1
75	1116	1011.82	1370.8	1.35479	1928481	1928771	291	b1848	yebG	16129801	NP_416362.1				1
8	69	26.6385	20.9189	0.785289	1928905	1930083	1179	b1849	purT	16129802	NP_416363.1				1
71	613	434.167	341.295	0.786091	1930139	1930780	642	b1850	eda	16129803	NP_416364.1		Cytoplasmic	CPR	1
62	700	134.328	138.084	1.02796	1930817	1932628	1812	b1851	edd	16129804	NP_416365.1		Cytoplasmic	CPR	1
98	882	260.659	213.593	0.819432	1932863	1934338	1476	b1852	zwf	16129805	NP_416366.1		Cytoplasmic	CPR	1
12	133	54.1496	54.6432	1.00912	1934676	1935545	870	b1853	yebK	16129806	NP_416367.1		Cytoplasmic	CPR	1
229	1397	623.021	346.046	0.555433	1935673	1937115	1443	b1854	pykA	16129807	NP_416368.1		Cytoplasmic	CPR	1
10	156	40.3894	57.367	1.42035	1937246	1938217	972	b1855	lpxM	16129808	NP_416369.1				1
43	700	127.597	189.122	1.48218	1938337	1939659	1323	b1856	mepM	90111345	NP_416370.2				1
29	435	122.025	166.652	1.36572	1939675	1940607	933	b1857	znuA	90111346	NP_416371.4		Secreted		1
57	837	295.997	395.738	1.33697	1940686	1941441	756	b1858	znuC	16129811	NP_416372.1				0
42	547	209.778	248.753	1.18579	1941438	1942223	786	b1859	znuB	16129812	NP_416373.1	multipass		MPR	0
13	115	50.4807	40.6584	0.805425	1942370	1943380	1011	b1860	ruvB	16129813	NP_416374.1		Cytoplasmic	CPR	0
10	140	64.1479	81.7675	1.27467	1943389	1944000	612	b1861	ruvA	16129814	NP_416375.1		Cytoplasmic	CPR	0
20	284	150.416	194.47	1.29288	1944879	1945400	522	b1863	ruvC	16129816	NP_416377.1		Cytoplasmic	CPR	0
45	443	238.412	213.693	0.896317	1945435	1946175	741	b1864	yebC	16129817	NP_416378.1		Cytoplasmic	CPR	0
27	322	233.991	254.075	1.08583	1946204	1946656	453	b1865	nudB	16129818	NP_416379.1				0
169	1467	374.207	295.75	0.79034	1946774	1948546	1773	b1866	aspS	16129819	NP_416380.1		Cytoplasmic	CPR	1
30	883	297.413	797.021	2.67985	1950290	1950685	396	b1869	yecN	90111349	NP_416383.4				0
5	89	26.3834	42.7584	1.62065	1950726	1951469	744	b1870	cmoA	16129823	NP_416384.1		Cytoplasmic	CPR	0
16	103	64.623	37.8769	0.586122	1951466	1952437	972	b1871	cmoB	16129824	NP_416385.1		Cytoplasmic	CPR	0
20	139	105.11	66.5117	0.632784	1956544	1957290	747	b1874	cutC	90111351	YP_025309.2		Cytoplasmic	CPR	1
12	123	27.1685	25.3548	0.933242	1958086	1959819	1734	b1876	argS	16129828	NP_416390.1		Cytoplasmic	CPR	1
7	75	13.2183	12.8947	0.975514	1960996	1963074	2079	b1879	flhA	16129831	NP_416393.1	multipass		MPR	0
5	67	33.902	41.3619	1.22004	1975290	1975868	579	b1891	flhC	16129843	NP_416405.1		Cytoplasmic	CPR	0
18	253	49.5897	63.4614	1.27973	1978212	1979636	1425	b1896	otsA	16129848	NP_416410.1		Cytoplasmic	CPR	0
24	341	117.628	152.169	1.29364	1979611	1980411	801	b1897	otsB	16129849	NP_416411.1				0
2117	41971	8420.49	15199.7	1.80509	1980578	1981564	987	b4460	araH	145698280	YP_026162.2	multipass		MPR	0
1917	24798	4967.56	5850.7	1.17778	1981579	1983093	1515	b1900	araG	16129850	NP_416413.1				0
3863	27340	15318.7	9871.14	0.644383	1983163	1984152	990	b1901	araF	16129851	NP_416414.1		Secreted		0
33	853	257.05	604.954	2.35345	1984949	1985452	504	b1902	ftnB	16129852	NP_416415.1		Cytoplasmic	CPR	1
28	360	220.73	258.391	1.17062	1986740	1987237	498	b1905	ftnA	16129855	NP_416418.1		Cytoplasmic	CPR	1
4	58	65.4308	86.3815	1.3202	1987275	1987514	240	b1906	yecH	16129856	NP_416419.1				1
15	143	48.5872	42.1733	0.867991	1987705	1988916	1212	b1907	tyrP	16129857	NP_416420.1	multipass		MPR	1
197	3127	1161.25	1678.25	1.44521	1988978	1989643	666	b1908	yecA	16129858	NP_416421.1		Cytoplasmic	CPR	1
30	391	214.527	254.571	1.18666	1990293	1990841	549	b1912	pgsA	16129859	NP_416422.1	multipass		MPR	1
24	299	51.4023	58.3059	1.13431	1990898	1992730	1833	b1913	uvrC	90111354	NP_416423.4		Cytoplasmic	CPR	0
17	143	101.582	77.7991	0.765874	1992727	1993383	657	b1914	uvrY	16129861	NP_416424.1		Cytoplasmic	CPR	0
4	34	21.7198	16.8091	0.773908	1994134	1994856	723	b1916	sdiA	16129863	NP_416426.1		Cytoplasmic	CPR	1
20	227	104.272	107.754	1.03339	1995086	1995838	753	b1917	yecC	16129864	NP_416427.1				0
11	174	64.5506	92.9666	1.44021	1995835	1996503	669	b1918	yecS	16129865	NP_416428.1	multipass		MPR	0
22	301	87.5062	109.007	1.2457	1996518	1997504	987	b1919	dcyD	90111355	NP_416429.4		Cytoplasmic	CPR	0
89	826	436.205	368.597	0.845007	1997609	1998409	801	b1920	fliY	16129867	NP_416430.1		Secreted		0
30	518	78.6743	123.684	1.5721	2000134	2001630	1497	b1923	fliC	16129870	NP_416433.1		Secreted		1
15	389	39.5751	93.4438	2.36118	2004180	2005667	1488	b1927	amyA	16129874	NP_416437.1		Cytoplasmic	CPR	1
23	277	218.103	239.157	1.09653	2005701	2006114	414	b1928	yedD	16129875	NP_416438.1				1
14	239	45.5737	70.8361	1.55432	2006301	2007506	1206	b1929	yedE	16129876	NP_416439.1	multipass		MPR	0
5	69	14.2862	17.9501	1.25646	2014578	2015951	1374	b1941	fliI	16129888	NP_416451.1		Cytoplasmic	CPR	0
6	96	23.4379	34.1436	1.45677	2018111	2019115	1005	b1945	fliM	16129892	NP_416455.1				0
7	118	145.402	223.164	1.53481	2022659	2022847	189	b1952	dsrB	16129899	NP_416462.1				1
10	331	172.186	518.916	3.01369	2023010	2023237	228	b1953	yodD	90111359	NP_416463.4				1
12	219	57.7331	95.9308	1.66163	2023535	2024350	816	b1955	yedP	16129901	NP_416464.1		Cytoplasmic	CPR	1
17	313	39.3743	66.0053	1.67635	2024347	2026041	1695	b1956	yedQ	90111360	NP_416465.2	multipass	Cytoplasmic	CPR	1
27	414	579.224	808.636	1.39607	2026212	2026394	183	b1957	yodC	16129903	NP_416466.1				1
57	573	243.762	223.108	0.915272	2026473	2027390	918	b1958	yedI	16129904	NP_416467.1	multipass		MPR	1
18	335	76.7267	130.014	1.6945	2027563	2028483	921	b1959	yedA	16129905	NP_416468.1	multipass		MPR	1
4	70	11.0665	17.6327	1.59334	2028923	2030341	1419	b1961	dcm	16129907	NP_416470.1		Cytoplasmic	CPR	0
6	49	33.8435	25.1646	0.743559	2030408	2031103	696	b1962	yedJ	16129908	NP_416471.1		Cytoplasmic	CPR	0
18	173	82.9405	72.5789	0.875072	2033859	2034710	852	b1967	hchA	16129913	NP_416476.1		Cytoplasmic	CPR	1
4	26	23.3681	13.8296	0.591812	2036176	2036847	672	b1969	yedW	90111362	NP_416478.2		Cytoplasmic	CPR	0
94	2068	462.443	926.3	2.00306	2041675	2042472	798	b1976	mtfA	90111364	NP_416484.2		Cytoplasmic	CPR	1
11	252	6.10207	12.7279	2.08583	2042962	2050038	7077	b1978	yeeJ	145698281	NP_416485.4		Secreted		1
15	247	44.7135	67.0371	1.49926	2051667	2052983	1317	b1981	shiA	16129925	NP_416488.1	multipass		MPR	1
27	313	72.8508	76.8927	1.05548	2053085	2054539	1455	b1982	amn	16129926	NP_416489.1		Cytoplasmic	CPR	1
11	90	60.2292	44.867	0.744938	2054882	2055598	717	b1983	yeeN	16129927	NP_416490.1		Cytoplasmic	CPR	1
7	144	18.4684	34.591	1.87299	2056227	2057714	1488	b1985	yeeO	226524727	NP_416491.2	multipass		MPR	1
17	314	71.5321	120.296	1.68171	2060415	2061347	933	b1990	erfK	16129931	NP_416494.1				1
16	205	58.1607	67.8475	1.16655	2061412	2062491	1080	b1991	cobT	16129932	NP_416495.1		Cytoplasmic	CPR	0
12	150	63.3201	72.0647	1.1381	2062503	2063246	744	b1992	cobS	16129933	NP_416496.1	multipass		MPR	0
12	112	86.2824	73.3212	0.849781	2063243	2063788	546	b1993	cobU	16129934	NP_416497.1		Cytoplasmic	CPR	0
68	376	85.5634	43.0762	0.503442	2069563	2072682	3120	b2000	flu	49176177	YP_026164.1		Secreted		1
6	74	15.3654	17.2541	1.12293	2072803	2074335	1533	b2001	yeeR	90111368	NP_416505.2	multipass		MPR	0
37	545	440.171	590.319	1.34111	2077056	2077385	330	b2007	yeeX	145698283	NP_416511.4		Cytoplasmic	CPR	1
15	342	55.6069	115.434	2.07589	2077557	2078615	1059	b2008	yeeA	16129949	NP_416512.1	multipass		MPR	1
72	1125	596.331	848.356	1.42263	2078813	2079286	474	b2009	sbmC	16129950	NP_416513.1		Cytoplasmic	CPR	1
8	95	26.9124	29.0976	1.0812	2079405	2080571	1167	b2010	dacD	162135904	NP_416514.4				1
11	187	30.2411	46.8077	1.54782	2080780	2082207	1428	b2011	sbcB	16129952	NP_416515.1				1
6	58	103.312	90.9279	0.880131	2082250	2082477	228	b2012	yeeD	16129953	NP_416516.1				0
17	450	71.7628	172.955	2.41009	2085353	2086282	930	b2015	yeeY	90111371	NP_416519.4		Cytoplasmic	CPR	1
130	1739	618.619	753.442	1.21794	2086328	2087152	825	b2016	yeeZ	16129957	NP_416520.1		Cytoplasmic	CPR	1
4	36	61.5819	50.4622	0.819432	2087235	2087489	255	b4539	yoeB	94541116	YP_588458.1				0
19	130	82.879	51.6303	0.62296	2088216	2089115	900	b2019	hisG	16129960	NP_416523.1		Cytoplasmic	CPR	0
19	163	57.1579	44.6458	0.781096	2089121	2090425	1305	b2020	hisD	16129961	NP_416524.1		Cytoplasmic	CPR	0
11	139	40.3215	46.3905	1.15052	2090422	2091492	1071	b2021	hisC	16129962	NP_416525.1		Cytoplasmic	CPR	0
17	101	62.4901	33.8029	0.540932	2091492	2092559	1068	b2022	hisB	90111373	NP_416526.4		Cytoplasmic	CPR	0
8	68	53.1418	41.1268	0.773908	2092559	2093149	591	b2023	hisH	16129964	NP_416527.1		Cytoplasmic	CPR	0
9	142	47.8762	68.7758	1.43654	2093149	2093886	738	b2024	hisA	90111374	NP_416528.2		Cytoplasmic	CPR	0
8	104	40.4206	47.8428	1.18362	2093868	2094644	777	b2025	hisF	16129966	NP_416529.1		Cytoplasmic	CPR	0
15	136	96.2218	79.4313	0.825502	2094638	2095249	612	b2026	hisI	16129967	NP_416530.1		Cytoplasmic	CPR	0
54	1178	216.102	429.22	1.9862	2095345	2096325	981	b2027	wzzB	90111375	NP_416531.4	multipass		MPR	1
86	719	239.959	182.658	0.761204	2097886	2099292	1407	b2029	gnd	16129970	NP_416533.1		Cytoplasmic	CPR	1
7	217	78.7419	222.248	2.82249	2099420	2099768	349	b4571	N/A	N/A	N/A				1
8	151	28.0668	48.2337	1.71853	2101415	2102533	1119	b2032	wbbK	16129972	NP_416536.1				0
16	250	106.284	151.202	1.42263	2102518	2103108	591	b2033	wbbJ	16129973	NP_416537.1				0
9	161	35.5817	57.9536	1.62875	2103089	2104081	993	b2034	wbbI	16129974	NP_416538.1		Cytoplasmic	CPR	0
5	252	16.8203	77.1851	4.58882	2104084	2105250	1167	b2035	wbbH	16129975	NP_416539.1				0
10	227	35.5602	73.4955	2.06679	2105250	2106353	1104	b2036	glf	16129976	NP_416540.1		Cytoplasmic	CPR	0
8	138	25.1657	39.5247	1.57058	2106361	2107608	1248	b2037	rfbX	16129977	NP_416541.1	multipass		MPR	0
4	59	28.1423	37.7939	1.34296	2107605	2108162	558	b2038	rfbC	16129978	NP_416542.1		Cytoplasmic	CPR	0
5	144	22.2554	58.3577	2.62218	2108162	2109043	882	b2039	rfbA	16129979	NP_416543.1		Cytoplasmic	CPR	0
8	97	34.8964	38.5242	1.10396	2109101	2110000	900	b2040	rfbD	16129980	NP_416544.1		Cytoplasmic	CPR	0
12	188	43.3795	61.8774	1.42642	2110000	2111085	1086	b2041	rfbB	16129981	NP_416545.1		Cytoplasmic	CPR	0
31	347	136.131	138.738	1.01915	2111458	2112351	894	b2042	galF	16129982	NP_416546.1		Cytoplasmic	CPR	1
11	229	27.2628	51.6755	1.89545	2135926	2137509	1584	b2063	yegH	90111378	NP_416567.4	multipass		MPR	1
38	544	80.4651	104.88	1.30342	2137783	2139636	1854	b2064	asmA	16130004	NP_416568.1				1
70	690	472.181	423.77	0.897473	2139658	2140239	582	b2065	dcd	16130005	NP_416569.1		Cytoplasmic	CPR	1
5	52	30.5751	28.9516	0.946899	2140331	2140972	642	b2066	udk	90111379	NP_416570.2		Cytoplasmic	CPR	1
36	502	42.5951	54.0793	1.26961	2141290	2144607	3318	b2067	yegE	16130007	NP_416571.1				1
17	222	78.6095	93.4651	1.18898	2144716	2145564	849	b2068	alkA	16130008	NP_416572.1				1
5	51	14.5079	13.4734	0.92869	2145698	2147050	1353	b2069	yegD	90111380	NP_416573.4		Cytoplasmic	CPR	1
10	185	20.1636	33.9633	1.68439	2147063	2149009	1947	b2070	yegI	16130010	NP_416574.1		Cytoplasmic	CPR	1
6	21	35.6895	11.3731	0.318668	2150493	2151152	660	b2073	yegL	16130013	NP_416577.1				0
4	39	12.5828	11.17	0.887718	2152040	2153287	1248	b2074	mdtA	90111381	NP_416578.2				0
4	63	5.0283	7.21062	1.43401	2153287	2156409	3123	b2075	mdtB	16130015	NP_416579.1	multipass		MPR	0
14	177	76.0192	87.5062	1.15111	2162300	2163022	723	b2079	baeR	16130019	NP_416583.1		Cytoplasmic	CPR	1
18	171	212.208	183.551	0.864956	2163213	2163545	333	b2080	yegP	90111382	NP_416584.4				1
9	75	25.9417	19.6829	0.758733	2163692	2165053	1362	b2081	yegQ	16130021	NP_416585.1		Cytoplasmic	CPR	1
7	49	30.5344	19.4607	0.637336	2166736	2167635	900	b2086	yegS	16130026	NP_416590.1		Cytoplasmic	CPR	1
1496	18438	5641.76	6330.92	1.12215	2169857	2170897	1041	b2091	gatD	16130029	NP_416594.1		Cytoplasmic	CPR	0
5688	83972	16467.7	22135	1.34414	2170945	2172300	1356	b2092	gatC	16130030	NP_416595.1	multipass		MPR	0
415	7448	5716.59	9341.12	1.63404	2172304	2172588	285	b2093	gatB	16130031	NP_416596.1		Cytoplasmic	CPR	0
805	15969	6976.4	12600.4	1.80614	2172619	2173071	453	b2094	gatA	16130032	NP_416597.1				0
4839	68493	15041.3	19384.2	1.28873	2173081	2174343	1263	b2095	gatZ	16130033	NP_416598.1		Cytoplasmic	CPR	0
3018	39556	13857.6	16536.8	1.19334	2174372	2175226	855	b2096	gatY	90111384	NP_416599.2		Cytoplasmic	CPR	0
34	278	126.761	94.3671	0.744451	2175534	2176586	1053	b2097	fbaB	90111385	NP_416600.4				1
5	52	20.3201	19.2411	0.946899	2179118	2180083	966	b2100	yegV	16130038	NP_416603.1		Cytoplasmic	CPR	0
12	159	63.0658	76.0818	1.20639	2180057	2180803	747	b2101	yegW	16130039	NP_416604.1		Cytoplasmic	CPR	1
6	100	29.4071	44.6243	1.51747	2181738	2182538	801	b2103	thiD	16130041	NP_416606.1				0
4	29	19.9029	13.1379	0.660098	2182535	2183323	789	b2104	thiM	16130042	NP_416607.1				0
8	114	57.8394	75.0428	1.29743	2189702	2190244	543	b2111	yehD	16130049	NP_416614.1				0
209	1416	739.191	455.978	0.616861	2191081	2192190	1110	b2113	mrp	90111388	NP_416616.4				1
36	235	69.484	41.2972	0.594341	2192322	2194355	2034	b2114	metG	16130052	NP_416617.1		Cytoplasmic	CPR	1
20	312	166.703	236.776	1.42035	2209748	2210218	471	b2124	yehS	16130062	NP_416628.1		Cytoplasmic	CPR	1
9	119	49.0731	59.077	1.20386	2210265	2210984	720	b2125	yehT	90111392	NP_416629.4		Cytoplasmic	CPR	0
28	236	65.198	50.0332	0.767405	2210981	2212666	1686	b2126	yehU	16130064	NP_416630.1	multipass		MPR	0
10	200	53.6318	97.6614	1.82096	2212888	2213619	732	b2127	mlrA	16130065	NP_416631.1		Cytoplasmic	CPR	1
12	139	64.3582	67.8747	1.05464	2213767	2214498	732	b2128	yehW	16130066	NP_416632.1	multipass		MPR	0
5	63	21.175	24.2921	1.1472	2214503	2215429	927	b2129	yehX	16130067	NP_416633.1				0
11	168	18.7921	26.1314	1.39055	2217714	2220011	2298	b2132	bglX	16130070	NP_416636.1		Secreted		1
178	2110	407.227	439.51	1.07928	2220207	2221922	1716	b2133	dld	16130071	NP_416637.1				1
5	105	21.0388	40.2264	1.91201	2221960	2222892	933	b2134	pbpG	162135905	NP_416638.4		Secreted		1
14	232	93.4726	141.031	1.5088	2223066	2223653	588	b2135	yohC	90111394	NP_416639.2	multipass		MPR	1
32	586	216.973	361.762	1.66732	2223823	2224401	579	b2136	yohD	90111395	NP_416640.2	multipass		MPR	1
6	128	30.9122	60.0425	1.94236	2224531	2225292	762	b2137	yohF	16130075	NP_416641.1		Cytoplasmic	CPR	1
8	287	78.7138	257.106	3.26635	2228646	2229044	399	b2141	yohJ	16130079	NP_416646.1	multipass		MPR	0
13	270	73.3276	138.662	1.891	2229041	2229736	696	b2142	yohK	16130080	NP_416647.1	multipass		MPR	0
78	489	346.007	197.501	0.570801	2229866	2230750	885	b2143	cdd	16130081	NP_416648.1				1
168	2277	532.318	656.895	1.23403	2232055	2233293	1239	b2146	preT	16130084	NP_416651.1		Cytoplasmic	CPR	0
360	4803	1143.45	1388.99	1.21473	2233287	2234522	1236	b2147	preA	90111398	NP_416652.4		Cytoplasmic	CPR	0
71	1024	275.703	362.037	1.31314	2234765	2235775	1011	b2148	mglC	16130086	NP_416653.1	multipass		MPR	0
30	451	77.4329	105.987	1.36876	2235791	2237311	1521	b2149	mglA	16130087	NP_416654.1				0
122	1261	479.433	451.184	0.941078	2237372	2238370	999	b2150	mglB	16130088	NP_416655.1		Secreted		0
29	408	109.366	140.092	1.28095	2238650	2239690	1041	b2151	galS	16130089	NP_416656.1		Cytoplasmic	CPR	1
5	157	16.951	48.4613	2.85891	2239832	2240989	1158	b2152	yeiB	16130090	NP_416657.1	multipass		MPR	0
19	179	111.496	95.6381	0.857768	2241006	2241674	669	b2153	folE	16130091	NP_416658.1		Cytoplasmic	CPR	0
79	806	370.54	344.202	0.92892	2241932	2242768	837	b2154	yeiG	16130092	NP_416659.1				1
7	60	13.7957	10.7663	0.780411	2242800	2244791	1992	b2155	cirA	16130093	NP_416660.1		Secreted		1
20	280	53.4129	68.0839	1.27467	2245085	2246554	1470	b2156	lysP	16130094	NP_416661.1	multipass		MPR	1
72	1279	320.477	518.33	1.61737	2246759	2247640	882	b2157	yeiE	16130095	NP_416662.1				1
9	164	33.6501	55.8288	1.6591	2247739	2248788	1050	b2158	yeiH	16130096	NP_416663.1	multipass		MPR	1
6	43	27.4535	17.9137	0.652511	2248862	2249719	858	b2159	nfo	16130097	NP_416664.1		Cytoplasmic	CPR	1
52	495	120.653	104.57	0.866707	2257741	2259432	1692	b2167	fruA	16130105	NP_416672.1	multipass		MPR	0
22	302	91.9794	114.96	1.24984	2259449	2260387	939	b2168	fruK	16130106	NP_416673.1		Cytoplasmic	CPR	0
72	626	249.921	197.841	0.791612	2260387	2261517	1131	b2169	fruB	16130107	NP_416674.1		Cytoplasmic	CPR	0
14	262	46.4991	79.2297	1.7039	2261885	2263066	1182	b2170	setB	16130108	NP_416675.1	multipass		MPR	1
7	85	47.9598	53.0235	1.10558	2263472	2264044	573	b2171	yeiP	90111399	NP_416676.4		Cytoplasmic	CPR	1
191	2142	511.136	521.907	1.02107	2264267	2265733	1467	b2172	yeiQ	16130110	NP_416677.1		Cytoplasmic	CPR	1
4	43	15.9102	15.5724	0.978766	2265851	2266837	987	b2173	yeiR	16130111	NP_416678.1		Cytoplasmic	CPR	0
10	172	69.239	108.43	1.56603	2268001	2268567	567	b2175	mepS	16130113	NP_416680.1				1
4	55	10.0857	12.6264	1.25191	2268748	2270304	1557	b2176	rtn	16130114	NP_416681.1	multipass		MPR	1
8	158	17.304	31.116	1.7982	2270386	2272200	1815	b2177	yejA	90111401	NP_416682.4		Secreted		0
8	217	30.6109	75.5991	2.46968	2273295	2274320	1026	b2179	yejE	16130117	NP_416684.1	multipass		MPR	0
64	912	158.022	205.023	1.29743	2274322	2275911	1590	b2180	yejF	16130118	NP_416685.1				0
148	2861	1684.13	2964.17	1.76006	2275915	2276259	345	b2181	yejG	16130119	NP_416686.1				1
21	416	69.2215	124.849	1.80362	2276592	2277782	1191	b2182	bcr	16130120	NP_416687.1	multipass		MPR	1
17	183	95.89	93.9822	0.980105	2277810	2278505	696	b2183	rsuA	16130121	NP_416688.1		Cytoplasmic	CPR	1
8	105	17.8346	21.3125	1.19501	2278654	2280414	1761	b2184	yejH	16130122	NP_416689.1		Cytoplasmic	CPR	1
55	1265	757.62	1586.53	2.0941	2280539	2280823	285	b2185	rplY	16130123	NP_416690.1		Cytoplasmic	CPR	1
24	163	93.4726	57.8004	0.618368	2280962	2281969	1008	b2186	yejK	16130124	NP_416691.1		Cytoplasmic	CPR	1
21	205	46.8159	41.6101	0.888802	2282398	2284158	1761	b2188	yejM	16130126	NP_416693.1	multipass		MPR	0
26	351	40.4246	49.6878	1.22915	2284412	2286936	2525	b2190	yejO	N/A	N/A				1
9	124	54.5257	68.3991	1.25444	2288522	2289169	648	b2193	narP	16130130	NP_416697.1		Cytoplasmic	CPR	1
23	400	85.7498	135.78	1.58344	2289380	2290432	1053	b2194	ccmH	16130131	NP_416698.1	multipass		MPR	0
16	172	112.569	110.179	0.978766	2290429	2290986	558	b2195	ccmG	16130132	NP_416699.1				0
83	958	167.616	176.146	1.05089	2290983	2292926	1944	b2196	ccmF	16130133	NP_416700.1	multipass		MPR	0
62	745	507.089	554.778	1.09404	2292923	2293402	480	b2197	ccmE	16130134	NP_416701.1		Cytoplasmic	CPR	0
24	339	448.668	577.011	1.28605	2293399	2293608	210	b2198	ccmD	16130135	NP_416702.1				0
39	865	207.464	418.951	2.0194	2293605	2294342	738	b2199	ccmC	16130136	NP_416703.1	multipass		MPR	0
29	334	171.719	180.068	1.04862	2294384	2295046	663	b2200	ccmB	16130137	NP_416704.1	multipass		MPR	0
100	1016	629.142	581.987	0.925048	2295043	2295666	624	b2201	ccmA	90111402	NP_416705.2				0
93	1108	605.479	656.79	1.08474	2295679	2296281	603	b2202	napC	16130139	NP_416706.1				0
82	731	715.377	580.643	0.81166	2296291	2296740	450	b2203	napB	90111403	NP_416707.4		Secreted		0
152	1471	690.659	608.559	0.881129	2296737	2297600	864	b2204	napH	16130141	NP_416708.1	multipass		MPR	0
151	1010	851.729	518.7	0.608997	2297587	2298282	696	b2205	napG	16130142	NP_416709.1		Cytoplasmic	CPR	0
358	3185	565.12	457.76	0.810022	2298289	2300775	2487	b2206	napA	16130143	NP_416710.1		Secreted		0
5	39	74.3532	52.8037	0.710174	2300772	2301035	264	b2207	napD	16130144	NP_416711.1		Cytoplasmic	CPR	0
45	608	356.895	439.038	1.23016	2301025	2301519	495	b2208	napF	16130145	NP_416712.1		Cytoplasmic	CPR	0
61	755	489.728	551.877	1.12691	2301927	2302415	489	b2209	eco	16130146	NP_416713.1		Secreted		1
4	125	9.53454	27.1282	2.84525	2303130	2304776	1647	b2210	mqo	16130147	NP_416714.1				1
10	130	36.8624	43.6313	1.18362	2307363	2308427	1065	b2213	ada	16130150	NP_416717.1		Cytoplasmic	CPR	0
2686	30320	9551.48	9816.67	1.02776	2309668	2310771	1104	b2215	ompC	16130152	NP_416719.1		Secreted		1
85	1143	124.84	152.845	1.22433	2311510	2314182	2673	b2216	rcsD	16130153	NP_416720.1	multipass		MPR	1
66	957	398.012	525.454	1.3202	2314199	2314849	651	b2217	rcsB	16130154	NP_416721.1		Cytoplasmic	CPR	1
24	371	33.0598	46.53	1.40745	2315049	2317898	2850	b2218	rcsC	145698285	NP_416722.2	multipass		MPR	1
12	218	25.7855	42.6503	1.65404	2318065	2319891	1827	b2219	atoS	16130156	NP_416723.1	multipass		MPR	0
17	268	48.1525	69.1155	1.43535	2319888	2321273	1386	b2220	atoC	16130157	NP_416724.1		Cytoplasmic	CPR	0
5	60	4.26259	4.65721	1.09258	2327820	2332424	4605	b4500	N/A	N/A	N/A				0
6	73	13.9462	15.4489	1.10775	2332978	2334666	1689	b2230	yfaA	90111405	NP_416733.4				0
185	1079	276.363	146.757	0.531031	2334815	2337442	2628	b2231	gyrA	16130166	NP_416734.1		Cytoplasmic	CPR	1
19	229	103.169	113.214	1.09737	2337589	2338311	723	b2232	ubiG	16130167	NP_416735.1		Cytoplasmic	CPR	1
29	289	30.3356	27.5247	0.90734	2338439	2342191	3753	b2233	yfaL	16130168	NP_416736.1		Secreted		1
44	301	75.5631	47.0646	0.622851	2342887	2345172	2286	b2234	nrdA	16130169	NP_416737.1		Cytoplasmic	CPR	0
22	140	76.3649	44.2455	0.579396	2345406	2346536	1131	b2235	nrdB	16130170	NP_416738.1		Cytoplasmic	CPR	0
27	391	162.823	214.684	1.31851	2346844	2347494	651	b2237	inaA	16130172	NP_416740.1		Cytoplasmic	CPR	1
23	310	83.8389	102.885	1.22717	2347957	2349033	1077	b2239	glpQ	16130174	NP_416742.1		Secreted		0
19	222	54.8868	58.3899	1.06382	2349038	2350396	1359	b2240	glpT	16130175	NP_416743.1	multipass		MPR	0
7	58	16.8698	12.7266	0.754398	2350669	2352297	1629	b2241	glpA	16130176	NP_416744.1				0
7	48	23.0738	14.4057	0.624329	2353543	2354733	1191	b2243	glpC	16130178	NP_416746.1				0
8	41	24.3463	11.3605	0.466621	2356885	2358174	1290	b2246	yfaV	90111406	NP_416749.4				0
5	69	16.2763	20.4506	1.25646	2358231	2359436	1206	b2247	yfaW	226524733	NP_416750.2		Cytoplasmic	CPR	0
42	431	137.062	128.061	0.934326	2360453	2361655	1203	b2249	yfaY	16130184	NP_416752.1				1
5	44	36.1496	28.9639	0.801222	2361755	2362297	543	b2250	yfaZ	90111407	NP_416753.4				1
6	102	11.8785	18.3858	1.54782	2366061	2368043	1983	b2255	arnA	16130190	NP_416758.1		Cytoplasmic	CPR	0
38	342	385.484	315.878	0.819432	2370914	2371300	387	b2258	arnF	90111409	NP_416761.4	multipass		MPR	0
30	650	441.107	870.174	1.97271	2371294	2371560	267	b2259	pmrD	90111410	NP_416762.2				1
22	308	63.6937	81.1886	1.27467	2371670	2373025	1356	b2260	menE	16130195	NP_416763.1		Cytoplasmic	CPR	0
42	180	171.221	66.8113	0.390206	2373022	2373984	963	b2261	menC	16130196	NP_416764.1		Cytoplasmic	CPR	0
30	97	137.267	40.41	0.294389	2373984	2374841	858	b2262	menB	16130197	NP_416765.1		Cytoplasmic	CPR	0
15	180	77.5859	84.7685	1.09258	2374856	2375614	759	b2263	menH	16130198	NP_416766.1				0
35	352	82.229	75.2957	0.915683	2375611	2377281	1671	b2264	menD	16130199	NP_416767.1				0
25	370	75.7301	102.047	1.34751	2377370	2378665	1296	b2265	menF	90111411	NP_416768.4		Cytoplasmic	CPR	0
141	2148	1808.97	2509.09	1.38703	2378744	2379049	306	b2266	elaB	16130201	NP_416769.1				1
20	244	169.95	188.778	1.11079	2379104	2379565	462	b2267	elaA	16130202	NP_416770.1		Cytoplasmic	CPR	1
8	52	34.2122	20.2472	0.591812	2379630	2380547	918	b2268	rbn	90111412	NP_416771.4		Cytoplasmic	CPR	1
170	1872	457.746	458.936	1.0026	2388070	2389527	1458	b2276	nuoN	145698289	NP_416779.2	multipass		MPR	0
153	1699	392.585	396.923	1.01105	2389534	2391063	1530	b2277	nuoM	16130212	NP_416780.1	multipass		MPR	0
278	2130	592.5	413.327	0.697598	2391227	2393068	1842	b2278	nuoL	16130213	NP_416781.1	multipass		MPR	0
59	336	764.439	396.37	0.518511	2393065	2393367	303	b2279	nuoK	16130214	NP_416782.1	multipass		MPR	0
101	700	714.434	450.826	0.631026	2393364	2393918	555	b2280	nuoJ	16130215	NP_416783.1	multipass		MPR	0
52	533	375.956	350.858	0.933242	2393930	2394472	543	b2281	nuoI	16130216	NP_416784.1		Cytoplasmic	CPR	0
111	1595	445.572	582.943	1.3083	2394487	2395464	978	b2282	nuoH	16130217	NP_416785.1	multipass		MPR	0
278	1070	400.215	140.25	0.350437	2395461	2398187	2727	b2283	nuoG	145698290	NP_416786.4		Cytoplasmic	CPR	0
120	566	352.094	151.204	0.429443	2398240	2399577	1338	b2284	nuoF	16130219	NP_416787.1		Cytoplasmic	CPR	0
53	311	415.309	221.884	0.534263	2399574	2400074	501	b2285	nuoE	16130220	NP_416788.1		Cytoplasmic	CPR	0
119	846	260.846	168.841	0.647282	2400077	2401867	1791	b2286	nuoC	145698291	NP_416789.2		Cytoplasmic	CPR	0
56	948	331.595	511.092	1.54131	2401973	2402635	663	b2287	nuoB	16130222	NP_416790.1				0
131	2267	1158.3	1825.04	1.57562	2402651	2403094	444	b2288	nuoA	49176207	NP_416791.3	multipass		MPR	0
35	578	146.331	220.022	1.50359	2403725	2404663	939	b2289	lrhA	16130224	NP_416792.1				1
36	441	116.035	129.418	1.11534	2405583	2406800	1218	b2290	alaA	16130225	NP_416793.1		Cytoplasmic	CPR	1
26	488	170.12	290.718	1.7089	2406884	2407483	600	b2291	yfbR	16130226	NP_416794.1		Cytoplasmic	CPR	1
386	8216	826.72	1602.15	1.93795	2407542	2409374	1833	b2292	yfbS	16130227	NP_416795.1	multipass		MPR	1
73	881	440.226	483.725	1.09881	2409461	2410111	651	b2293	yfbT	90111414	NP_416796.2		Cytoplasmic	CPR	0
12	199	95.1721	143.698	1.50988	2410122	2410616	495	b2294	yfbU	90111415	NP_416797.2		Cytoplasmic	CPR	0
24	464	206.624	363.712	1.76026	2410699	2411154	456	b2295	yfbV	16130230	NP_416798.1	multipass		MPR	1
184	2592	600.462	770.147	1.28259	2411492	2412694	1203	b2296	ackA	16130231	NP_416799.1		Cytoplasmic	CPR	0
163	876	298.328	145.976	0.489313	2412769	2414913	2145	b2297	pta	16130232	NP_416800.1		Cytoplasmic	CPR	0
8	70	20.6488	16.4503	0.79667	2415103	2416623	1521	b2298	yfcC	90111416	NP_416801.2	multipass		MPR	1
18	218	130.139	143.503	1.10269	2416656	2417198	543	b2299	yfcD	16130234	NP_416802.1		Cytoplasmic	CPR	1
13	193	91.9568	124.299	1.35171	2417256	2417810	555	b2300	yfcE	49176208	NP_416803.3				1
104	989	456.698	395.424	0.865832	2419730	2420623	894	b2304	yfcH	16130239	NP_416807.1		Cytoplasmic	CPR	0
6	154	26.4367	61.7799	2.3369	2420671	2421561	891	b2305	yfcI	16130240	NP_416808.1		Cytoplasmic	CPR	1
7	81	40.0014	42.1437	1.05356	2423252	2423938	687	b2308	hisQ	16130243	NP_416811.1	multipass		MPR	0
15	254	75.2078	115.951	1.54175	2424028	2424810	783	b2309	hisJ	16130244	NP_416812.1		Secreted		0
5	48	25.0693	21.9121	0.874061	2425031	2425813	783	b2310	argT	16130245	NP_416813.1		Secreted		0
13	147	33.6206	34.6138	1.02954	2426743	2428260	1518	b2312	purF	16130247	NP_416815.1		Cytoplasmic	CPR	0
24	372	192.68	271.918	1.41124	2428297	2428785	489	b2313	cvpA	16130248	NP_416816.1	multipass		MPR	0
61	840	361.202	452.866	1.25378	2429044	2429706	663	b2314	dedD	90111417	NP_416817.2				0
38	498	117.559	140.272	1.19321	2429696	2430964	1269	b2315	folC	16130250	NP_416818.1		Cytoplasmic	CPR	0
37	355	158.75	138.679	0.873569	2431034	2431948	915	b2316	accD	16130251	NP_416819.1		Cytoplasmic	CPR	1
15	297	89.2238	160.848	1.80275	2432104	2432763	660	b2317	dedA	16130252	NP_416820.1	multipass		MPR	0
42	320	202.811	140.69	0.693699	2432846	2433658	813	b2318	truA	16130253	NP_416821.1				0
12	166	46.4597	58.5159	1.2595	2433658	2434671	1014	b2319	usg	16130254	NP_416822.1		Cytoplasmic	CPR	0
35	336	120.848	105.629	0.874061	2434737	2435873	1137	b2320	pdxB	16130255	NP_416823.1		Cytoplasmic	CPR	0
5	68	19.7081	24.4036	1.23825	2435972	2436967	996	b2321	flk	16130256	NP_416824.1				1
5	19	16.6491	5.76028	0.345982	2436964	2438142	1179	b2322	yfcJ	16130257	NP_416825.1	multipass		MPR	1
226	1125	726.652	329.337	0.453226	2438407	2439627	1221	b2323	fabB	16130258	NP_416826.1		Cytoplasmic	CPR	1
32	286	62.5945	50.9357	0.813742	2439786	2441792	2007	b2324	mnmC	90111418	NP_416827.4		Cytoplasmic	CPR	1
7	85	98.498	108.898	1.10558	2441913	2442191	279	b2325	yfcL	16130260	NP_416828.1				0
6	129	42.9054	83.9888	1.95753	2442225	2442773	549	b2326	epmC	16130261	NP_416829.1		Cytoplasmic	CPR	0
15	139	72.7009	61.3386	0.843712	2442773	2443582	810	b2327	yfcA	16130262	NP_416830.1	multipass		MPR	0
6	45	28.5516	19.4968	0.68286	2443582	2444406	825	b2328	mepA	16130263	NP_416831.1		Secreted		0
13	133	46.9945	43.775	0.931491	2444410	2445495	1086	b2329	aroC	16130264	NP_416832.1		Cytoplasmic	CPR	0
8	85	33.6622	32.5643	0.967385	2445530	2446462	933	b2330	prmB	90111419	NP_416833.4		Cytoplasmic	CPR	0
28	295	199.137	191.024	0.959256	2446628	2447179	552	b2331	smrB	16130266	NP_416834.1		Cytoplasmic	CPR	1
12	210	57.3117	91.317	1.59334	2447250	2448071	822	b2332	yfcO	90111420	NP_416835.2		Secreted		0
9	167	13.3532	22.5596	1.68945	2450378	2453023	2646	b4661	N/A	N/A	N/A				0
25	706	201.947	519.245	2.5712	2454349	2454834	486	b2340	sixA	16130273	NP_416842.1				1
69	1125	126.286	187.469	1.48448	2455037	2457181	2145	b2341	fadJ	16130274	NP_416843.1		Cytoplasmic	CPR	0
67	1082	200.635	295.004	1.47036	2457181	2458491	1311	b2342	fadI	16130275	NP_416844.1		Cytoplasmic	CPR	0
359	4121	4945.19	5168.47	1.04515	2458672	2458956	285	b2343	yfcZ	90111421	NP_416845.2				1
5	94	14.6378	25.0555	1.7117	2459328	2460668	1341	b2344	fadL	145698292	NP_416846.2		Secreted		1
18	252	93.4726	119.147	1.27467	2462274	2463029	756	b2346	mlaA	16130279	NP_416848.1		Secreted		1
4	39	16.8311	14.9413	0.887718	2463323	2464255	933	b2347	yfdC	16130280	NP_416849.1	multipass		MPR	1
14	150	5.38051	5.24876	0.975514	2464407	2474621	10215	N/A	N/A	N/A	N/A				1
6	120	17.7239	32.2746	1.82096	2477224	2478552	1329	b2366	dsdA	16130298	NP_416867.1				0
9	352	57.4514	204.584	3.56099	2481777	2482391	615	b2369	evgA	16130301	NP_416870.1		Cytoplasmic	CPR	0
13	240	14.2003	23.8692	1.68089	2482396	2485989	3594	b2370	evgS	16130302	NP_416871.1	multipass		MPR	0
48	1233	775.476	1813.68	2.3388	2493072	2493314	243	b2377	yfdY	16130309	NP_416878.1	multipass		MPR	1
158	1681	673.49	652.397	0.968682	2493667	2494587	921	b2378	lpxP	90111426	NP_416879.4				1
15	148	47.5284	42.6967	0.89834	2495079	2496317	1239	b2379	alaC	16130311	NP_416880.1		Cytoplasmic	CPR	1
13	275	30.0566	57.8894	1.92602	2496693	2498390	1698	b2380	ypdA	16130312	NP_416881.1	multipass		MPR	0
8	105	42.7303	51.063	1.19501	2498405	2499139	735	b2381	ypdB	16130313	NP_416882.1		Cytoplasmic	CPR	0
14	266	64.0581	110.815	1.72991	2499152	2500009	858	b2382	ypdC	16130314	NP_416883.1		Cytoplasmic	CPR	0
64	1028	260.098	380.382	1.46246	2506483	2507448	966	b2388	glk	16130320	NP_416889.1		Cytoplasmic	CPR	1
6	139	18.7391	39.5261	2.10928	2507652	2508908	1257	b2389	yfeO	16130321	NP_416890.1	multipass		MPR	1
12	76	144.068	83.0749	0.576637	2509023	2509349	327	b2390	ypeC	16130322	NP_416891.1				1
21	412	66.5398	118.858	1.78628	2509490	2510728	1239	b2392	mntH	16130324	NP_416893.1	multipass		MPR	1
7	141	12.5484	23.0133	1.83397	2513665	2515854	2190	b2395	yfeA	90111428	NP_416896.4				1
17	197	193.448	204.104	1.05509	2516489	2516833	345	b2398	yfeC	90111429	NP_416897.2				0
20	485	199.789	441.116	2.20791	2516835	2517227	393	b2399	yfeD	226524736	NP_416898.3		Cytoplasmic	CPR	0
28	338	77.6298	85.3213	1.09908	2517279	2518694	1416	b2400	gltX	16130330	NP_416899.1		Cytoplasmic	CPR	1
8	143	24.9855	40.6635	1.62748	2520751	2522007	1257	b2406	xapB	16130332	NP_416901.1	multipass		MPR	0
15	353	58.9467	126.303	2.14266	2524968	2525966	999	b2410	yfeH	16130336	NP_416905.1				1
4	77	71.705	125.675	1.75267	2525963	2526181	219	b4546	ypeB	94541121	YP_588464.1				0
29	299	56.473	53.0133	0.938736	2526183	2528198	2016	b2411	ligA	16130337	NP_416906.1		Cytoplasmic	CPR	0
91	962	361.958	348.387	0.962507	2528269	2529255	987	b2412	zipA	16130338	NP_416907.1				1
6	142	30.9122	66.6097	2.1548	2529485	2530246	762	b2413	cysZ	16130339	NP_416908.1	multipass		MPR	1
47	597	189.83	219.539	1.1565	2530431	2531402	972	b2414	cysK	16130340	NP_416909.1		Cytoplasmic	CPR	1
30	175	456.494	242.45	0.531113	2531786	2532043	258	b2415	ptsH	16130341	NP_416910.1		Cytoplasmic	CPR	0
298	2884	677.027	596.562	0.881149	2532088	2533815	1728	b2416	ptsI	16130342	NP_416911.1		Cytoplasmic	CPR	0
161	1682	1239.34	1178.85	0.951197	2533856	2534365	510	b2417	crr	16130343	NP_416912.1		Cytoplasmic	CPR	0
19	207	87.5483	86.843	0.991944	2534408	2535259	852	b2418	pdxK	16130344	NP_416913.1		Cytoplasmic	CPR	1
6	59	32.0477	28.6925	0.895305	2535771	2536505	735	b2420	yfeS	16130346	NP_416915.1		Cytoplasmic	CPR	0
12	117	51.6559	45.8559	0.887718	2536694	2537605	912	b2421	cysM	16130347	NP_416916.1		Cytoplasmic	CPR	0
7	74	25.0282	24.0898	0.962507	2537739	2538836	1098	b2422	cysA	16130348	NP_416917.1				0
684	5290	3390.51	2387.45	0.704158	2541854	2542645	792	b2426	ucpA	90111431	NP_416921.4		Cytoplasmic	CPR	1
4	40	18.3023	16.6639	0.91048	2542774	2543631	858	b2427	murR	16130352	NP_416922.1		Cytoplasmic	CPR	1
6	93	26.2599	37.0591	1.41124	2543795	2544691	897	b2428	murQ	16130353	NP_416923.1		Cytoplasmic	CPR	0
14	216	38.5697	54.1805	1.40474	2544695	2546119	1425	b2429	murP	16130354	NP_416924.1	multipass		MPR	0
11	130	33.0914	35.6071	1.07602	2546124	2547428	1305	b2430	yfeW	90111432	NP_416925.2				0
313	2418	1365.32	960.324	0.703368	2547668	2548567	900	b2431	yfeX	90111433	NP_416926.4		Cytoplasmic	CPR	1
17	183	115.867	113.562	0.980105	2548663	2549238	576	b2432	yfeY	16130357	NP_416927.1				1
11	151	101.372	126.698	1.24984	2549735	2550160	426	b2434	ypeA	90111435	NP_416929.4		Cytoplasmic	CPR	0
23	234	103.787	96.1392	0.926314	2550374	2551243	870	b2435	amiA	16130360	NP_416930.1				0
17	216	74.1549	85.7858	1.15685	2551247	2552146	900	b2436	hemF	16130361	NP_416931.1		Cytoplasmic	CPR	0
7	99	26.0978	33.6055	1.28768	2552152	2553204	1053	b2437	eutR	16130362	NP_416932.1		Cytoplasmic	CPR	0
9	52	70.5242	37.0996	0.526055	2553250	2553750	501	b2438	eutK	90111436	NP_416933.4				0
6	53	35.6895	28.7036	0.804257	2553763	2554422	660	b2439	eutL	16130364	NP_416934.1				0
16	172	70.736	69.234	0.978766	2554432	2555319	888	b2440	eutC	16130365	NP_416935.1		Cytoplasmic	CPR	0
58	860	167.18	225.697	1.35002	2555340	2556701	1362	b2441	eutB	90111437	NP_416936.4				0
60	507	34.8294	26.7962	0.769356	2556721	2563483	6763	N/A	N/A	N/A	N/A				1
6	65	80.1194	79.026	0.986353	2570179	2570472	294	b2457	eutM	90111439	NP_416952.2				0
365	2556	628.48	400.71	0.637585	2574120	2576399	2280	b2463	maeB	16130388	NP_416958.1		Cytoplasmic	CPR	1
16	255	66.05	95.8437	1.45108	2576688	2577638	951	b2464	talA	16130389	NP_416959.1		Cytoplasmic	CPR	0
42	565	82.2783	100.775	1.22481	2577658	2579661	2004	b2465	tktB	16130390	NP_416960.1		Cytoplasmic	CPR	0
18	192	67.687	65.7362	0.971179	2579756	2580799	1044	b2466	ypfG	16130391	NP_416961.1				1
15	227	102.236	140.866	1.37786	2580925	2581500	576	b2467	nudK	16130392	NP_416962.1		Cytoplasmic	CPR	1
15	206	29.7413	37.1883	1.25039	2581568	2583547	1980	b2468	aegA	16130393	NP_416963.1		Cytoplasmic	CPR	1
13	231	30.0035	48.5413	1.61785	2583753	2585453	1701	b2469	narQ	16130394	NP_416964.1	multipass		MPR	1
8	144	10.0857	16.529	1.63886	2585617	2588730	3114	b2470	acrD	16130395	NP_416965.1	multipass		MPR	1
18	343	1177.75	2043.37	1.73497	2588829	2588888	60	b4606	ypfM	145698299	YP_001165325.1				1
38	444	132.254	140.695	1.06382	2589629	2590756	1128	b2472	dapE	16130397	NP_416967.1		Cytoplasmic	CPR	0
10	121	195.316	215.176	1.10168	2590784	2590984	201	b4547	ypfN	94541122	YP_588465.1				0
30	308	168.491	157.499	0.93476	2591094	2591792	699	b2473	ypfH	90111441	NP_416968.2				1
31	340	60.3677	60.2827	0.998591	2591866	2593881	2016	b2474	tmcA	16130399	NP_416969.1				0
32	357	145.402	147.693	1.01575	2593896	2594759	864	b2475	ypfJ	16130400	NP_416970.1				0
18	161	98.971	80.5994	0.814374	2594927	2595640	714	b2476	purC	16130401	NP_416971.1		Cytoplasmic	CPR	1
108	1112	409.654	384.033	0.937457	2595853	2596887	1035	b2477	bamC	90111442	NP_416972.4		Secreted		0
144	1828	643.142	743.346	1.1558	2596904	2597782	879	b2478	dapA	16130403	NP_416973.1		Cytoplasmic	CPR	0
8	192	54.8111	119.771	2.18515	2597928	2598500	573	b2479	gcvR	90111443	NP_416974.4		Cytoplasmic	CPR	1
12	164	100.022	124.459	1.24432	2598500	2598970	471	b2480	bcp	16130405	NP_416975.1		Cytoplasmic	CPR	1
6	83	14.1218	17.7863	1.2595	2606509	2608176	1668	b2487	hyfG	16130412	NP_416982.1		Cytoplasmic	CPR	0
16	256	59.1465	86.1627	1.45677	2612842	2613903	1062	b2493	yfgO	16130418	NP_416988.1				1
29	247	77.7661	60.3059	0.775478	2614116	2615579	1464	b2494	yfgC	16130419	NP_416989.1				0
4	48	43.6205	47.6588	1.09258	2615600	2615959	360	b2495	yfgD	16130420	NP_416990.1		Cytoplasmic	CPR	0
13	179	72.7009	91.1423	1.25366	2616097	2616798	702	b2496	hda	226524737	NP_416991.2		Cytoplasmic	CPR	1
5	119	15.2165	32.9732	2.16694	2616893	2618182	1290	b2497	uraA	16130422	NP_416992.1	multipass		MPR	0
13	193	81.3972	110.026	1.35171	2618268	2618894	627	b2498	upp	90111448	NP_416993.2		Cytoplasmic	CPR	0
27	502	102.117	172.866	1.69282	2619219	2620256	1038	b2499	purM	16130424	NP_416994.1		Cytoplasmic	CPR	0
9	91	55.2936	50.9031	0.920596	2620256	2620894	639	b2500	purN	16130425	NP_416995.1		Cytoplasmic	CPR	0
55	753	104.461	130.214	1.24653	2621066	2623132	2067	b2501	ppk	16130426	NP_416996.1				0
26	593	66.1946	137.459	2.07659	2623137	2624678	1542	b2502	ppx	16130427	NP_416997.1		Cytoplasmic	CPR	0
78	679	194.053	153.804	0.792585	2628980	2630557	1578	b2507	guaA	16130432	NP_417002.1		Cytoplasmic	CPR	0
18	148	48.1699	36.0608	0.748617	2630626	2632092	1467	b2508	guaB	16130433	NP_417003.1		Cytoplasmic	CPR	0
23	407	65.8603	106.111	1.61115	2632254	2633624	1371	b2509	xseA	16130434	NP_417004.1		Cytoplasmic	CPR	1
4	35	72.7009	57.9186	0.79667	2633621	2633836	216	b2510	yfgJ	90111449	NP_417005.2				1
39	525	103.943	127.397	1.22565	2633906	2635378	1473	b2511	der	90111450	NP_417006.2		Cytoplasmic	CPR	0
60	616	199.789	186.754	0.93476	2635496	2636674	1179	b2512	bamB	16130437	NP_417007.1		Secreted		0
50	504	316.091	290.097	0.917764	2636685	2637305	621	b2513	yfgM	16130438	NP_417008.1		Secreted		1
134	1013	412.599	283.99	0.688296	2637323	2638597	1275	b2514	hisS	16130439	NP_417009.1		Cytoplasmic	CPR	1
92	905	322.769	289.083	0.895635	2638708	2639826	1119	b2515	ispG	16130440	NP_417010.1		Cytoplasmic	CPR	1
76	933	294.245	328.888	1.11773	2639853	2640866	1014	b2516	rodZ	16130441	NP_417011.1				1
8	117	27.192	36.2083	1.33158	2641151	2642305	1155	b2517	rlmN	16130442	NP_417012.1		Cytoplasmic	CPR	1
8	86	72.7009	71.1572	0.978766	2642455	2642886	432	b2518	ndk	16130443	NP_417013.1		Cytoplasmic	CPR	1
20	215	33.9459	33.2251	0.978766	2643035	2645347	2313	b2519	pbpC	16130444	NP_417014.1				0
319	3309	252.387	238.366	0.944445	2645348	2650309	4962	b2520	yfhM	16130445	NP_417015.1				0
112	2007	519.734	847.971	1.63155	2650516	2651361	846	b2521	sseA	90111451	NP_417016.4				1
19	165	95.9989	75.9044	0.79068	2652179	2652955	777	b2522	sseB	90111452	NP_417017.4		Cytoplasmic	CPR	1
133	891	406.649	248.037	0.609953	2653097	2654380	1284	b2523	pepB	90111453	NP_417018.4		Cytoplasmic	CPR	1
6	52	117.19	92.4722	0.789083	2654558	2654758	201	b2524	iscX	16130449	NP_417019.1				0
5	77	58.4204	81.9135	1.40214	2654770	2655105	336	b2525	fdx	16130450	NP_417020.1		Cytoplasmic	CPR	0
39	241	82.7164	46.5387	0.56263	2655107	2656957	1851	b2526	hscA	16130451	NP_417021.1		Cytoplasmic	CPR	0
12	80	91.2988	55.4172	0.606987	2656974	2657489	516	b2527	hscB	16130452	NP_417022.1		Cytoplasmic	CPR	0
57	1259	690.659	1388.94	2.01104	2657585	2657908	324	b2528	iscA	16130453	NP_417023.1		Cytoplasmic	CPR	0
16	186	162.309	171.793	1.05843	2657925	2658311	387	b2529	iscU	16130454	NP_417024.1		Cytoplasmic	CPR	0
27	221	87.2411	65.016	0.745245	2658339	2659553	1215	b2530	iscS	49176235	YP_026169.1		Cytoplasmic	CPR	0
4	116	32.1133	84.7917	2.64039	2659665	2660153	489	b2531	iscR	16130456	NP_417026.1				0
143	1607	757.62	775.178	1.02318	2660605	2661345	741	b2532	trmJ	16130457	NP_417027.1		Cytoplasmic	CPR	1
14	45	68.3605	20.006	0.292654	2661464	2662267	804	b2533	suhB	16130458	NP_417028.1		Cytoplasmic	CPR	1
29	580	88.8756	161.839	1.82096	2663457	2664737	1281	b2535	csiE	90111454	NP_417030.2		Cytoplasmic	CPR	1
4	205	13.7749	64.2766	4.66621	2664729	2665868	1140	b2536	hcaT	16130461	NP_417031.1	multipass		MPR	1
7	44	30.8428	17.6514	0.572302	2666028	2666918	891	b2537	hcaR	16130462	NP_417032.1		Cytoplasmic	CPR	1
10	93	28.8241	24.4067	0.846746	2667054	2668415	1362	b2538	hcaE	16130463	NP_417033.1		Cytoplasmic	CPR	0
9	124	83.5287	104.782	1.25444	2671368	2671790	423	b2543	yphA	145698300	NP_417038.4	multipass		MPR	1
4	66	17.9879	27.023	1.50229	2671838	2672710	873	b2544	yphB	16130469	NP_417039.1				0
8	36	29.5732	12.1166	0.409716	2672722	2673783	1062	b2545	yphC	90111455	NP_417040.2		Cytoplasmic	CPR	0
83	929	259.845	264.803	1.01908	2682276	2683529	1254	b2551	glyA	16130476	NP_417046.1		Cytoplasmic	CPR	1
47	367	154.924	110.143	0.710949	2683857	2685047	1191	b2552	hmp	16130477	NP_417047.1		Cytoplasmic	CPR	1
9	91	104.226	95.9502	0.920596	2685092	2685430	339	b2553	glnB	16130478	NP_417048.1				1
4	67	11.7628	17.939	1.52505	2685491	2686825	1335	b2554	glrR	16130479	NP_417049.1		Cytoplasmic	CPR	1
5	53	27.4919	26.5327	0.965109	2686815	2687528	714	b2555	yfhG	16130480	NP_417050.1				1
11	141	30.2411	35.2935	1.16707	2687693	2689120	1428	b2556	glrK	90111458	NP_417051.2	multipass		MPR	1
27	254	27.2628	23.3513	0.856526	2689678	2693565	3888	b2557	purL	49176239	YP_026170.1		Cytoplasmic	CPR	1
4	70	10.0857	16.0699	1.59334	2693823	2695379	1557	b2558	mltF	171701683	NP_417053.2		Cytoplasmic	CPR	1
10	172	77.8938	121.984	1.56603	2695376	2695879	504	b2559	tadA	145698301	NP_417054.2		Cytoplasmic	CPR	0
35	440	216.045	247.286	1.1446	2695937	2696572	636	b2560	pgpC	90111459	NP_417055.4				0
6	61	61.8244	57.228	0.925655	2698640	2699020	381	b2563	acpS	16130488	NP_417058.1		Cytoplasmic	CPR	0
13	144	69.7214	70.3162	1.00853	2699020	2699751	732	b2564	pdxJ	16130489	NP_417059.1		Cytoplasmic	CPR	0
9	108	48.4673	52.9542	1.09258	2699763	2700491	729	b2565	recO	16130490	NP_417060.1		Cytoplasmic	CPR	0
19	188	82.3302	74.1709	0.900896	2700503	2701408	906	b2566	era	16130491	NP_417061.1				0
19	288	109.532	151.164	1.3801	2701405	2702085	681	b2567	rnc	16130492	NP_417062.1		Cytoplasmic	CPR	0
20	121	80.5302	44.3593	0.55084	2702357	2703331	975	b2568	lepB	16130493	NP_417063.1	multipass		MPR	0
29	309	63.2498	61.3607	0.970132	2703347	2705146	1800	b2569	lepA	16130494	NP_417064.1				0
44	383	359.869	285.208	0.792532	2705344	2705823	480	b2570	rseC	16130495	NP_417065.1	multipass		MPR	0
49	480	201.01	179.281	0.891899	2705820	2706776	957	b2571	rseB	16130496	NP_417066.1		Secreted		0
330	4023	1990.06	2208.88	1.10996	2706776	2707426	651	b2572	rseA	16130497	NP_417067.1				0
419	7937	2855.78	4925.36	1.7247	2707459	2708034	576	b2573	rpoE	16130498	NP_417068.1		Cytoplasmic	CPR	0
11	157	26.6077	34.5768	1.2995	2708442	2710064	1623	b2574	nadB	16130499	NP_417069.1		Cytoplasmic	CPR	1
7	168	37.237	81.3686	2.18515	2710049	2710786	738	b2575	yfiC	90111461	NP_417070.2				1
11	159	32.3478	42.5716	1.31606	2710918	2712252	1335	b2576	srmB	16130501	NP_417071.1		Cytoplasmic	CPR	1
9	270	40.0597	109.421	2.73144	2712461	2713342	882	b2577	yfiE	90111462	NP_417072.4		Cytoplasmic	CPR	1
4	46	26.7065	27.963	1.04705	2713445	2714032	588	b2578	eamB	16130503	NP_417073.1	multipass		MPR	1
660	5679	6747.55	5286.21	0.783427	2714088	2714471	384	b2579	grcA	16130504	NP_417074.1		Cytoplasmic	CPR	1
11	342	62.586	177.166	2.83077	2714776	2715465	690	b2580	ung	16130505	NP_417075.1		Cytoplasmic	CPR	1
41	473	155.067	162.88	1.05038	2715513	2716550	1038	b2581	yfiF	16130506	NP_417076.1		Cytoplasmic	CPR	1
5	88	46.7363	74.8923	1.60244	2716757	2717176	420	b2582	trxC	16130507	NP_417077.1		Cytoplasmic	CPR	1
256	3145	377.684	422.454	1.11854	2717975	2720635	2661	b2584	pka	16130509	NP_417079.1		Cytoplasmic	CPR	0
93	1039	269.251	273.88	1.01719	2720749	2722104	1356	b2585	pssA	90111464	NP_417080.4		Cytoplasmic	CPR	1
22	244	266.57	269.184	1.00981	2722150	2722473	324	b2586	yfiM	145698302	NP_417081.2				1
226	3532	683.019	971.886	1.42293	2722470	2723768	1299	b2587	kgtP	16130512	NP_417082.1	multipass		MPR	1
119	965	181.498	134.006	0.73833	2729622	2732195	2574	b2592	clpB	16130513	NP_417083.1		Cytoplasmic	CPR	1
22	168	117.99	82.0356	0.695276	2732325	2733056	732	b2593	yfiH	16130514	NP_417084.1				0
24	193	96.0452	70.3222	0.732178	2733053	2734033	981	b2594	rluD	16130515	NP_417085.1		Cytoplasmic	CPR	0
46	656	244.701	317.725	1.29842	2734168	2734905	738	b2595	bamD	16130516	NP_417086.1		Secreted		1
156	3288	1790.74	3436.45	1.91901	2735176	2735517	342	b2597	raiA	16130518	NP_417088.1		Cytoplasmic	CPR	1
9	117	30.4329	36.0212	1.18362	2735767	2736927	1161	b2599	pheA	16130520	NP_417090.1		Cytoplasmic	CPR	0
8	225	27.9918	71.6793	2.56073	2736970	2738091	1122	b2600	tyrA	16130521	NP_417091.1		Cytoplasmic	CPR	0
9	114	32.9903	38.0469	1.15327	2738102	2739172	1071	b2601	aroF	16130522	NP_417092.1		Cytoplasmic	CPR	0
11	367	83.2068	252.757	3.03769	2739897	2740415	519	b2603	yfiR	16130524	NP_417094.1				0
4	80	12.7982	23.305	1.82096	2740405	2741631	1227	b2604	yfiN	16130525	NP_417095.1	multipass		MPR	0
105	973	1184.52	999.396	0.843712	2742205	2742552	348	b2606	rplS	16130527	NP_417097.1		Cytoplasmic	CPR	0
244	746	1247.27	347.201	0.278368	2742594	2743361	768	b2607	trmD	16130528	NP_417098.1		Cytoplasmic	CPR	0
144	485	1029.73	315.772	0.306655	2743392	2743940	549	b2608	rimM	90111466	NP_417099.4		Cytoplasmic	CPR	0
52	313	819.856	449.313	0.548039	2743959	2744207	249	b2609	rpsP	16130530	NP_417100.1		Cytoplasmic	CPR	0
200	1198	576.483	314.401	0.545378	2744456	2745817	1362	b2610	ffh	16130531	NP_417101.1				1
10	176	30.5039	48.8808	1.60244	2746796	2748082	1287	b4461	yfjD	145698304	YP_026171.3	multipass		MPR	1
51	721	337.068	433.863	1.28717	2748137	2748730	594	b2614	grpE	16130533	NP_417104.1		Cytoplasmic	CPR	1
11	209	49.1289	84.9887	1.72991	2748853	2749731	879	b2615	nadK	16130534	NP_417105.1		Cytoplasmic	CPR	1
7	92	16.5349	19.7861	1.19663	2749817	2751478	1662	b2616	recN	49176247	YP_026172.1		Cytoplasmic	CPR	1
19	202	218.103	211.12	0.967984	2751627	2751968	342	b2617	bamE	90111468	NP_417107.2		Secreted		1
4	98	53.9636	120.375	2.23068	2752030	2752320	291	b2618	ratB	90111469	NP_417108.4		Cytoplasmic	CPR	0
22	574	181.066	430.128	2.37553	2752310	2752786	477	b2619	ratA	16130538	NP_417109.1				0
59	905	479.555	669.739	1.39658	2752918	2753400	483	b2620	smpB	16130539	NP_417110.1				1
40	429	71.705	70.0192	0.97649	2759373	2761562	2190	b2627	yfjK	16130545	NP_417116.1		Cytoplasmic	CPR	0
43	665	104.398	146.999	1.40807	2761559	2763175	1617	b2628	yfjL	16130546	NP_417117.1		Cytoplasmic	CPR	0
45	1218	164.491	405.366	2.46437	2763940	2765013	1074	b2630	rnlA	16130548	NP_417119.1				0
30	756	316.601	726.412	2.29441	2765006	2765377	372	b2631	rnlB	90111470	NP_417120.2				0
4	23	18.1752	9.5152	0.523526	2765732	2766595	864	b2632	yfjP	49176249	YP_026173.1				0
4	24	33.5543	18.3303	0.546288	2769170	2769637	468	b2637	yfjT	16130554	NP_417125.1				0
21	158	3.7423	2.56358	0.685028	2753979	2776008	22030	N/A	N/A	N/A	N/A				1
12	146	10.2838	11.3919	1.10775	2776168	2780748	4581	b2647	ypjA	90111474	NP_417134.2				1
10	30	30.9366	8.45013	0.273144	2788004	2789272	1269	b2660	lhgO	90111477	NP_417146.2		Cytoplasmic	CPR	0
9	126	24.3842	31.0818	1.27467	2789295	2790743	1449	b2661	gabD	16130575	NP_417147.1		Cytoplasmic	CPR	0
17	202	52.0995	56.3646	1.08186	2790757	2792037	1281	b2662	gabT	16130576	NP_417148.1		Cytoplasmic	CPR	0
4	32	11.2087	8.16424	0.728384	2792275	2793675	1401	b2663	gabP	16130577	NP_417149.1	multipass		MPR	0
9	104	53.2921	56.0691	1.05211	2793696	2794358	663	b2664	csiR	90111478	NP_417150.4		Cytoplasmic	CPR	1
77	915	671.756	726.796	1.08193	2794359	2794808	450	b2665	ygaU	16130579	NP_417151.1				1
4	50	98.7635	112.403	1.1381	2794892	2795050	159	b2666	yqaE	16130580	NP_417152.1	multipass		MPR	1
7	118	52.3446	80.339	1.53481	2795542	2796066	525	b2668	ygaP	16130582	NP_417154.1	multipass		MPR	0
9	187	78.517	148.536	1.89178	2797186	2797635	450	b2670	alaE	16130584	NP_417156.1	multipass		MPR	1
74	611	849.453	638.586	0.751761	2798156	2798497	342	b2672	ygaM	49176257	NP_417158.3				1
28	475	148.948	230.06	1.54456	2807639	2808376	738	b2682	ygaZ	16130594	NP_417167.1	multipass		MPR	0
5	69	58.4204	73.403	1.25646	2808366	2808701	336	b2683	ygaH	16130595	NP_417168.1				0
7	78	51.7532	52.5054	1.01453	2808792	2809322	531	b2684	mprA	16130596	NP_417169.1		Cytoplasmic	CPR	0
13	149	33.1618	34.606	1.04355	2810638	2812176	1539	b2686	emrB	16130598	NP_417171.1	multipass		MPR	0
26	323	197.814	223.747	1.1311	2812240	2812755	516	b2687	luxS	16130599	NP_417172.1		Cytoplasmic	CPR	1
52	836	131.114	191.921	1.46377	2812905	2814461	1557	b2688	gshA	16130600	NP_417173.1		Cytoplasmic	CPR	1
11	244	100.663	203.3	2.01961	2814534	2814962	429	b2689	yqaA	16130601	NP_417174.1	multipass		MPR	0
20	450	138.478	283.683	2.04858	2814959	2815525	567	b2690	yqaB	16130602	NP_417175.1		Cytoplasmic	CPR	0
102	2339	2152.88	4494.91	2.08786	2816983	2817168	186	b2696	csrA	16130603	NP_417176.1				1
270	4398	402.881	597.501	1.48307	2817403	2820033	2631	b2697	alaS	16130604	NP_417177.1		Cytoplasmic	CPR	1
234	1188	865.017	399.849	0.462244	2820730	2821791	1062	b2699	recA	16130606	NP_417179.1		Cytoplasmic	CPR	1
7	82	25.3047	26.9891	1.06656	2822513	2823598	1086	b2701	mltB	16130608	NP_417181.1				1
148	2053	1030.19	1301.11	1.26298	2823854	2824417	564	b2702	srlA	49176260	YP_026180.1	multipass		MPR	0
295	2982	1206.38	1110.3	0.920356	2824414	2825373	960	b2703	srlE	49176261	YP_026181.1	multipass		MPR	0
81	594	854.822	570.752	0.667685	2825384	2825755	372	b2704	srlB	16130611	NP_417184.1		Cytoplasmic	CPR	0
331	2366	1665.97	1084.24	0.650814	2825759	2826538	780	b2705	srlD	16130612	NP_417185.1		Cytoplasmic	CPR	0
12	292	130.862	289.924	2.2155	2826643	2827002	360	b2706	gutM	16130613	NP_417186.1				0
28	382	142.02	176.411	1.24215	2827069	2827842	774	b2707	srlR	16130614	NP_417187.1		Cytoplasmic	CPR	0
49	608	199.137	224.973	1.12974	2827835	2828800	966	b2708	gutQ	90111480	NP_417188.4				0
9	99	23.3219	23.3575	1.00153	2828797	2830311	1515	b2709	norR	90111481	NP_417189.2		Cytoplasmic	CPR	1
23	404	40.0775	64.095	1.59928	2833195	2835447	2253	b2712	hypF	16130619	NP_417192.1		Cytoplasmic	CPR	0
9	309	34.8448	108.924	3.12598	2836276	2837289	1014	b2714	ascG	16130621	NP_417194.1				1
5	83	13.7749	20.8194	1.5114	2839012	2840436	1425	b2716	ascB	16130623	NP_417196.1		Cytoplasmic	CPR	0
18	299	150.032	226.91	1.51241	2840595	2841065	471	b2717	hycI	16130624	NP_417197.1				0
55	579	615.161	589.624	0.958487	2848669	2849019	351	b2726	hypA	16130633	NP_417206.1		Cytoplasmic	CPR	0
316	2024	1421.04	828.706	0.583168	2849023	2849895	873	b2727	hypB	16130634	NP_417207.1		Cytoplasmic	CPR	0
47	371	675.879	485.753	0.718698	2849886	2850158	273	b2728	hypC	16130635	NP_417208.1				0
378	3993	1322.61	1272.07	0.961785	2850158	2851279	1122	b2729	hypD	16130636	NP_417209.1		Cytoplasmic	CPR	0
267	2601	1036.8	919.588	0.886951	2851276	2852286	1011	b2730	hypE	226524740	NP_417210.2		Cytoplasmic	CPR	0
57	607	107.635	104.361	0.969581	2852360	2854438	2079	b2731	fhlA	16130638	NP_417211.1		Cytoplasmic	CPR	0
35	797	388.149	804.746	2.07329	2854475	2854828	354	b2732	ygbA	16130639	NP_417212.1				1
11	85	16.8557	11.8589	0.703553	2855115	2857676	2562	b2733	mutS	16130640	NP_417213.1		Cytoplasmic	CPR	1
14	254	71.5649	118.216	1.65187	2858489	2859256	768	b2735	ygbI	226524741	NP_417215.2		Cytoplasmic	CPR	1
186	2553	735.355	918.979	1.24971	2864581	2865573	993	b2741	rpoS	16130648	NP_417221.1		Cytoplasmic	CPR	0
172	2097	592.321	657.503	1.11004	2865636	2866775	1140	b2742	nlpD	16130649	NP_417222.1		Secreted		0
32	467	200.362	266.228	1.32873	2866915	2867541	627	b2743	pcm	16130650	NP_417223.1		Cytoplasmic	CPR	0
22	410	113.345	192.324	1.6968	2867535	2868296	762	b2744	umpG	16130651	NP_417224.1				0
18	210	67.3003	71.4881	1.06223	2868277	2869326	1050	b2745	truD	16130652	NP_417225.1		Cytoplasmic	CPR	1
4	33	32.7154	24.574	0.751146	2869323	2869802	480	b2746	ispF	16130653	NP_417226.1		Cytoplasmic	CPR	0
9	64	49.6943	32.1747	0.647452	2869802	2870512	711	b2747	ispD	16130654	NP_417227.1		Cytoplasmic	CPR	0
14	200	176.16	229.129	1.30069	2870531	2870842	312	b2748	ftsB	16130655	NP_417228.1				1
5	32	32.3915	18.8748	0.582707	2871409	2872014	606	b2750	cysC	16130657	NP_417230.1		Cytoplasmic	CPR	0
9	180	24.7427	45.0555	1.82096	2872014	2873441	1428	b2751	cysN	16130658	NP_417231.1		Cytoplasmic	CPR	0
18	293	26.4962	39.2689	1.48206	2882575	2885241	2667	b2761	cas3	16130668	NP_417241.1				1
4	19	9.16719	3.96461	0.432478	2886409	2888121	1713	b2763	cysI	16130670	NP_417243.1		Cytoplasmic	CPR	0
6	36	13.0862	7.14881	0.546288	2888121	2889920	1800	b2764	cysJ	16130671	NP_417244.1				0
52	643	160.491	180.687	1.12584	2890679	2891950	1272	b2766	ygcN	90111484	NP_417246.4		Cytoplasmic	CPR	0
5	86	75.2078	117.777	1.56603	2891941	2892201	261	b2767	ygcO	90111485	NP_417247.2				0
6	134	40.8943	83.1546	2.03341	2892218	2892793	576	b2768	ygcP	16130675	NP_417248.1		Cytoplasmic	CPR	0
33	612	192.787	325.526	1.68853	2902769	2903440	672	b2777	queE	16130684	NP_417257.1		Cytoplasmic	CPR	1
302	1149	912.707	316.166	0.346404	2904665	2905963	1299	b2779	eno	16130686	NP_417259.1		Cytoplasmic	CPR	0
125	1683	299.592	367.26	1.22587	2906051	2907688	1638	b2780	pyrG	16130687	NP_417260.1		Cytoplasmic	CPR	0
45	539	223.06	243.258	1.09055	2907916	2908707	792	b2781	mazG	16130688	NP_417261.1		Cytoplasmic	CPR	0
10	202	116.841	214.89	1.83917	2908778	2909113	336	b2782	mazF	16130689	NP_417262.1				0
11	278	173.431	399.07	2.30103	2909113	2909361	249	b2783	mazE	16130690	NP_417263.1				0
188	1813	330.228	289.951	0.878032	2909439	2911673	2235	b2784	relA	16130691	NP_417264.1		Cytoplasmic	CPR	0
71	934	214.082	256.413	1.19773	2911721	2913022	1302	b2785	rlmD	16130692	NP_417265.1		Cytoplasmic	CPR	1
16	304	22.7833	39.4131	1.72991	2913079	2915835	2757	b2786	barA	16130693	NP_417266.1	multipass		MPR	1
390	3906	1141.75	1041.14	0.911881	2916067	2917407	1341	b2787	gudD	16130694	NP_417267.1				0
163	1738	477.191	463.26	0.970806	2917428	2918768	1341	b2788	gudX	16130695	NP_417268.1		Cytoplasmic	CPR	0
256	2813	742.807	743.149	1.00046	2918770	2920122	1353	b2789	gudP	16130696	NP_417269.1	multipass		MPR	0
37	657	322.792	521.863	1.61672	2920557	2921006	450	b2790	yqcA	16130697	NP_417270.1				0
5	20	25.0693	9.13003	0.364192	2921024	2921806	783	b2791	truC	16130698	NP_417271.1		Cytoplasmic	CPR	0
6	106	43.1412	69.3932	1.60851	2922757	2923302	546	b2793	syd	16130700	NP_417273.1				1
11	150	50.8649	63.1521	1.24156	2923370	2924218	849	b2794	queF	16130701	NP_417274.1		Cytoplasmic	CPR	1
584	4556	1679.63	1193.04	0.710299	2924330	2925694	1365	b2795	ygdH	16130702	NP_417275.1		Cytoplasmic	CPR	1
12	51	36.5195	14.1314	0.386954	2926251	2927540	1290	b2796	sdaC	16130703	NP_417276.1	multipass		MPR	0
9	77	25.828	20.1191	0.778966	2927598	2928965	1368	b2797	sdaB	16130704	NP_417277.1		Cytoplasmic	CPR	0
6	75	31.1575	35.4604	1.1381	2929077	2929832	756	b2798	ygdG	226524743	NP_417278.4		Cytoplasmic	CPR	1
139	1426	473.692	442.457	0.934061	2929887	2931038	1152	b2799	fucO	16130706	NP_417279.1				0
30	298	181.752	164.379	0.90441	2931063	2931710	648	b2800	fucA	16130707	NP_417280.1		Cytoplasmic	CPR	0
5	107	14.9045	29.0404	1.94843	2932257	2933573	1317	b2801	fucP	16130708	NP_417281.1	multipass		MPR	0
33	270	72.9465	54.3406	0.744938	2933606	2935381	1776	b2802	fucI	16130709	NP_417282.1		Cytoplasmic	CPR	0
15	166	40.6403	40.949	1.0076	2935460	2936908	1449	b2803	fucK	16130710	NP_417283.1		Cytoplasmic	CPR	0
8	113	74.2477	95.4865	1.28605	2936910	2937332	423	b2804	fucU	16130711	NP_417284.1		Cytoplasmic	CPR	0
4	85	21.4527	41.5061	1.93477	2937390	2938121	732	b2805	fucR	16130712	NP_417285.1		Cytoplasmic	CPR	0
7	126	24.96	40.906	1.63886	2938165	2939265	1101	b2806	rlmM	16130713	NP_417286.1		Cytoplasmic	CPR	1
5	51	49.5688	46.034	0.92869	2939258	2939653	396	b2807	ygdD	16130714	NP_417287.1	multipass		MPR	1
5	65	21.3826	25.309	1.18362	2939672	2940589	918	b2808	gcvA	16130715	NP_417288.1		Cytoplasmic	CPR	1
6	85	103.312	133.256	1.28985	2940940	2941167	228	b2809	ygdI	90111491	NP_417289.2				1
24	297	78.1263	88.0264	1.12672	2941359	2942564	1206	b2810	csdA	16130717	NP_417290.1		Cytoplasmic	CPR	0
10	185	88.42	148.934	1.68439	2942564	2943007	444	b2811	csdE	16130718	NP_417291.1		Cytoplasmic	CPR	0
15	156	72.9712	69.0963	0.946899	2943058	2943864	807	b2812	tcdA	16130719	NP_417292.1		Cytoplasmic	CPR	1
27	155	96.5373	50.4584	0.522683	2944103	2945200	1098	b2813	mltA	16130720	NP_417293.1		Secreted		1
6	66	17.684	17.711	1.00153	2947264	2948595	1332	b2818	argA	16130722	NP_417295.1		Cytoplasmic	CPR	1
23	186	49.4223	36.3897	0.736301	2948657	2950483	1827	b2819	recD	16130723	NP_417296.1		Cytoplasmic	CPR	0
38	354	42.1062	35.7138	0.848184	2950483	2954025	3543	b2820	recB	16130724	NP_417297.1		Cytoplasmic	CPR	0
18	227	24.4601	28.0855	1.14822	2954018	2956906	2889	b2821	ptrA	16130725	NP_417298.1		Secreted		0
31	478	36.1239	50.7144	1.4039	2957082	2960450	3369	b2822	recC	16130726	NP_417299.1		Cytoplasmic	CPR	0
6	43	41.7643	27.2517	0.652511	2961175	2961738	564	b2825	ppdB	16130729	NP_417302.1				0
15	240	74.0726	107.907	1.45677	2962383	2963177	795	b2827	thyA	16130731	NP_417304.1		Cytoplasmic	CPR	0
19	396	85.1497	161.583	1.89763	2963184	2964059	876	b2828	lgt	16130732	NP_417305.1	multipass		MPR	0
102	1196	178.209	190.253	1.06758	2964210	2966456	2247	b2829	ptsP	16130733	NP_417306.1		Cytoplasmic	CPR	0
97	2126	717.151	1431.11	1.99555	2966469	2966999	531	b2830	rppH	16130734	NP_417307.1		Cytoplasmic	CPR	0
6	53	34.1378	27.4556	0.804257	2967684	2968373	690	b2831	mutH	16130735	NP_417308.1		Cytoplasmic	CPR	1
6	96	32.9903	48.0593	1.45677	2968442	2969155	714	b2832	ygdQ	16130736	NP_417309.1	multipass		MPR	1
17	394	304.746	643.067	2.11017	2969293	2969511	219	b2833	ygdR	16130737	NP_417310.1				1
30	320	113.137	109.876	0.971179	2969619	2970659	1041	b2834	tas	16130738	NP_417311.1		Cytoplasmic	CPR	1
15	211	49.3197	63.1658	1.28074	2970691	2971884	1194	b2835	lplT	16130739	NP_417312.1	multipass		MPR	0
11	191	19.9927	31.607	1.58092	2971877	2974036	2160	b2836	aas	16130740	NP_417313.1	multipass		MPR	0
35	603	133.144	208.853	1.56863	2974621	2975652	1032	b2837	galR	16130741	NP_417314.1		Cytoplasmic	CPR	1
9	248	27.9752	70.1863	2.50888	2975659	2976921	1263	b2838	lysA	16130742	NP_417315.1		Cytoplasmic	CPR	1
136	2346	570.422	895.893	1.57058	2977043	2977978	936	b2839	lysR	16130743	NP_417316.1		Cytoplasmic	CPR	1
785	11866	4447.03	6120.33	1.37627	2977965	2978657	693	b2840	ygeA	16130744	NP_417317.1		Cytoplasmic	CPR	0
2469	25946	6830.81	6535.7	0.956797	2978786	2980204	1419	b2841	araE	16130745	NP_417318.1	multipass		MPR	0
15	350	77.2805	164.179	2.12445	2980519	2981280	762	b2842	kduD	16130746	NP_417319.1		Cytoplasmic	CPR	1
50	843	166.068	254.926	1.53507	2982433	2983614	1182	b2844	yqeF	90111494	NP_417321.2		Cytoplasmic	CPR	1
25	303	129.823	143.26	1.1035	2997158	2997913	756	b2865	ygeR	90111503	NP_417341.4		Secreted		1
47	663	81.6799	104.906	1.28436	2998367	3000625	2259	b2866	xdhA	16130768	NP_417342.1		Cytoplasmic	CPR	0
12	120	53.5952	48.7974	0.91048	3000636	3001514	879	b2867	xdhB	16130769	NP_417343.1		Cytoplasmic	CPR	0
14	180	114.504	134.04	1.17062	3001511	3001990	480	b2868	xdhC	16130770	NP_417344.1		Cytoplasmic	CPR	0
80	1391	176.542	279.483	1.5831	3002030	3003808	1779	b2869	ygeV	16130771	NP_417345.1		Cytoplasmic	CPR	1
48	359	158.221	107.742	0.680963	3004284	3005474	1191	b2870	ygeW	49176276	YP_026185.1		Cytoplasmic	CPR	1
39	378	127.91	112.876	0.882465	3005532	3006728	1197	b2871	ygeX	16130773	NP_417347.1		Cytoplasmic	CPR	1
42	391	136.044	115.313	0.847614	3006786	3007997	1212	b2872	ygeY	16130774	NP_417348.1		Cytoplasmic	CPR	1
13	115	36.8225	29.6578	0.805425	3008050	3009435	1386	b2873	hyuA	90111504	NP_417349.4		Cytoplasmic	CPR	1
9	151	37.8699	57.8495	1.52758	3009483	3010415	933	b2874	yqeA	16130776	NP_417350.1		Cytoplasmic	CPR	1
197	2592	475.641	569.795	1.19795	3010636	3012261	1626	b2875	yqeB	16130777	NP_417351.1		Cytoplasmic	CPR	1
76	989	386.984	458.507	1.18482	3012309	3013079	771	b2876	yqeC	90111505	NP_417352.2				1
13	371	88.1451	229.034	2.59837	3013182	3013760	579	b2877	mocA	16130779	NP_417353.1				1
102	1350	129.215	155.71	1.20505	3014082	3017180	3099	b2878	ygfK	16130780	NP_417354.1		Cytoplasmic	CPR	0
55	545	162.469	146.58	0.902203	3017183	3018511	1329	b2879	ssnA	90111506	NP_417355.4		Cytoplasmic	CPR	0
49	415	246.624	190.177	0.771121	3018562	3019341	780	b2880	ygfM	16130782	NP_417356.1		Cytoplasmic	CPR	0
73	830	99.8213	103.335	1.0352	3019338	3022208	2871	b2881	xdhD	16130783	NP_417357.1				0
8	67	22.9582	17.5062	0.762527	3025143	3026510	1368	b4464	ygfQ	49176279	YP_026186.1				0
4	62	8.17885	11.5424	1.41124	3027034	3028953	1920	b2887	ygfT	90111509	NP_417363.2		Cytoplasmic	CPR	0
11	107	29.8029	26.3949	0.885649	3029389	3030837	1449	b2888	uacT	90111510	NP_417364.2	multipass		MPR	1
46	291	118.965	68.5212	0.575978	3031679	3033196	1518	b2890	lysS	16130792	NP_417366.1		Cytoplasmic	CPR	0
37	192	141.991	67.0856	0.472465	3033206	3034228	1023	b2891	prfB	16130793	NP_417367.1		Cytoplasmic	CPR	0
39	451	88.2976	92.9676	1.05289	3034395	3036128	1734	b2892	recJ	16130794	NP_417368.1		Cytoplasmic	CPR	0
15	229	82.8238	115.125	1.39	3036134	3036844	711	b2893	dsbC	16130795	NP_417369.1		Secreted		0
32	697	140.053	277.744	1.98314	3036869	3037765	897	b2894	xerD	16130796	NP_417370.1		Cytoplasmic	CPR	0
36	338	270.748	231.446	0.85484	3037877	3038398	522	b2895	fldB	16130797	NP_417371.1		Cytoplasmic	CPR	1
41	559	394.509	489.729	1.24136	3038438	3038845	408	b2896	cptA	16130798	NP_417372.1	multipass		MPR	1
47	827	691.067	1107.13	1.60206	3038826	3039092	267	b2897	cptB	16130799	NP_417373.1		Cytoplasmic	CPR	1
46	565	184.087	205.865	1.11831	3039335	3040315	981	b2898	ygfZ	16130800	NP_417374.1				1
474	5980	2819.47	3238.63	1.14866	3040511	3041170	660	b2899	yqfA	16130801	NP_417375.1	multipass		MPR	1
32	427	87.2411	105.991	1.21492	3041684	3043123	1440	b2901	bglA	16130803	NP_417377.1		Cytoplasmic	CPR	1
13	167	68.5968	80.232	1.16962	3043180	3043923	744	b2902	ygfF	16130804	NP_417378.1		Cytoplasmic	CPR	1
340	2454	464.436	305.205	0.657152	3044190	3047063	2874	b2903	gcvP	16130805	NP_417379.1		Cytoplasmic	CPR	0
196	1197	1972.99	1097.07	0.556043	3047182	3047571	390	b2904	gcvH	16130806	NP_417380.1				0
203	1611	727.806	525.878	0.722553	3047595	3048689	1095	b2905	gcvT	16130807	NP_417381.1		Cytoplasmic	CPR	0
62	747	202.33	221.952	1.09698	3049137	3050339	1203	b2906	ubiI	16130808	NP_417382.1		Cytoplasmic	CPR	0
86	926	286.364	280.738	0.980354	3050362	3051540	1179	b2907	ubiH	16130809	NP_417383.1				0
94	803	278.303	216.459	0.777782	3051537	3052862	1326	b2908	pepP	16130810	NP_417384.1		Cytoplasmic	CPR	0
70	661	474.628	408.063	0.859753	3052888	3053466	579	b2909	ygfB	90111511	NP_417385.4		Cytoplasmic	CPR	0
42	445	499.653	482.003	0.964675	3053634	3053963	330	b2910	zapA	16130812	NP_417386.1				1
634	180	13601	351.581	0.0258496	3054005	3054187	183	b2911	ssrS	N/A	N/A				0
47	377	336.093	245.456	0.730321	3054263	3054811	549	b2912	fau	49176282	NP_417387.3				0
34	153	108.255	44.354	0.409716	3055200	3056432	1233	b2913	serA	16130814	NP_417388.1		Cytoplasmic	CPR	1
44	524	261.723	283.786	1.0843	3056688	3057347	660	b2914	rpiA	16130815	NP_417389.1				1
12	124	52.696	49.5779	0.940829	3057775	3058668	894	b2916	argP	16130817	NP_417391.1		Cytoplasmic	CPR	1
35	376	185.431	181.373	0.978116	3065362	3066102	741	b2922	yggE	16130823	NP_417397.1		Secreted		1
13	118	80.2453	66.3176	0.826436	3066195	3066830	636	b2923	argO	16130824	NP_417398.1	multipass		MPR	1
20	348	91.1928	144.471	1.58424	3066969	3067829	861	b2924	mscS	16130825	NP_417399.1	multipass		MPR	1
103	875	374.41	289.593	0.773466	3068187	3069266	1080	b2925	fbaA	16130826	NP_417400.1		Cytoplasmic	CPR	0
227	1364	765.608	418.857	0.54709	3069481	3070644	1164	b2926	pgk	16130827	NP_417401.1		Cytoplasmic	CPR	0
59	710	227.083	248.807	1.09566	3070694	3071713	1020	b2927	epd	16130828	NP_417402.1		Cytoplasmic	CPR	0
9	90	49.4855	45.0555	0.91048	3071998	3072711	714	b2928	yggC	16130829	NP_417403.1		Cytoplasmic	CPR	0
8	89	61.5819	62.3769	1.01291	3072708	3073217	510	b2929	yggD	16130830	NP_417404.1				0
897	4260	1767.81	764.406	0.432402	3077666	3079657	1992	b2935	tktA	49176286	YP_026188.1		Cytoplasmic	CPR	1
81	970	418.964	456.808	1.09033	3079935	3080693	759	b2936	loiP	90111514	NP_417411.2				1
22	290	93.7771	112.549	1.20018	3080899	3081819	921	b2937	speB	16130838	NP_417412.1		Cytoplasmic	CPR	0
64	535	127.089	96.7278	0.761104	3081957	3083933	1977	b2938	speA	16130839	NP_417413.1		Secreted		0
4	42	72.7009	69.5024	0.956004	3084209	3084424	216	b2940	yqgC	16130841	NP_417415.1				1
25	191	84.9751	59.1092	0.695607	3084728	3085882	1155	b2942	metK	16130843	NP_417417.1		Cytoplasmic	CPR	1
188	2088	529.075	535.008	1.01121	3086306	3087700	1395	b2943	galP	16130844	NP_417418.1	multipass		MPR	1
22	221	117.99	107.916	0.914619	3089156	3089887	732	b2946	rsmE	90111515	NP_417421.4		Cytoplasmic	CPR	0
88	708	363.275	266.107	0.732523	3089900	3090850	951	b2947	gshB	16130848	NP_417422.1		Cytoplasmic	CPR	0
16	316	111.372	200.268	1.7982	3090959	3091522	564	b2948	yqgE	90111516	NP_417423.4				0
7	97	65.9015	83.1457	1.26167	3091522	3091938	417	b2949	yqgF	16130850	NP_417424.1		Cytoplasmic	CPR	0
5	48	20.0094	17.4895	0.874061	3092122	3093102	981	b2950	yggR	90111517	NP_417425.2		Cytoplasmic	CPR	1
7	49	38.9801	24.8434	0.637336	3093120	3093824	705	b2951	yggS	16130852	NP_417426.1		Cytoplasmic	CPR	0
8	120	55.3912	75.6488	1.36572	3093842	3094408	567	b2952	yggT	16130853	NP_417427.1	multipass		MPR	0
10	41	66.0917	24.6718	0.373297	3094703	3095296	594	b2954	rdgB	16130855	NP_417429.1		Cytoplasmic	CPR	0
8	72	27.6225	22.6348	0.819432	3095289	3096425	1137	b2955	yggW	16130856	NP_417430.1		Cytoplasmic	CPR	0
1193	8165	4473.29	2787.49	0.623141	3097704	3098750	1047	b2957	ansB	16130858	NP_417432.1		Secreted		1
26	505	141.767	250.705	1.76843	3098926	3099645	720	b2958	yggN	16130859	NP_417433.1				1
46	736	552.26	804.515	1.45677	3099829	3100155	327	b2959	yggL	90111519	NP_417434.4		Cytoplasmic	CPR	0
18	184	98.1462	91.346	0.930713	3100155	3100874	720	b2960	trmI	16130861	NP_417435.1		Cytoplasmic	CPR	0
17	160	63.3803	54.312	0.856922	3101035	3102087	1053	b2961	mutY	16130862	NP_417436.1		Cytoplasmic	CPR	0
4	113	56.8964	146.343	2.57211	3102115	3102390	276	b2962	yggX	16130863	NP_417437.1				0
9	32	32.7154	10.5908	0.323726	3102455	3103534	1080	b2963	mltC	90111520	NP_417438.2				0
46	512	143.667	145.592	1.0134	3103736	3104992	1257	b2964	nupG	90111521	NP_417439.4	multipass		MPR	0
8	148	14.7036	24.7665	1.68439	3105042	3107177	2136	b2965	speC	90111522	NP_417440.4		Cytoplasmic	CPR	1
76	1647	421.419	831.504	1.97311	3107575	3108282	708	b2966	yqgA	16130867	NP_417441.1	multipass		MPR	1
5	77	20.3834	28.5804	1.40214	3109150	3110112	963	b2969	N/A	N/A	N/A				0
4	69	3.44146	5.40509	1.57058	3112572	3117134	4563	b4466	yghJ	49176293	YP_026189.1				1
229	2159	413.913	355.301	0.858396	3119656	3121827	2172	b2976	glcB	16130876	NP_417450.1		Cytoplasmic	CPR	0
61	402	591.301	354.793	0.600021	3121849	3122253	405	b2977	glcG	16130877	NP_417451.1				0
61	614	195.651	179.304	0.91645	3122258	3123481	1224	b4467	glcF	49176294	YP_026190.1				0
41	397	152.858	134.762	0.881611	3123492	3124544	1053	b4468	glcE	49176295	YP_026191.1				0
69	630	180.589	150.125	0.831308	3124544	3126043	1500	b2979	glcD	16130879	NP_417453.1		Cytoplasmic	CPR	0
23	393	118.032	183.626	1.55573	3126294	3127058	765	b2980	glcC	16130880	NP_417454.1		Cytoplasmic	CPR	1
86	681	181.518	130.869	0.720973	3134685	3136544	1860	b2988	gss	16130888	NP_417462.1		Cytoplasmic	CPR	1
59	741	267.157	305.494	1.1435	3136749	3137615	867	b2989	yghU	90111524	NP_417463.4		Cytoplasmic	CPR	1
47	517	741.024	742.156	1.00153	3137738	3137986	249	b2990	hybG	16130890	NP_417464.1				0
43	519	493.601	542.432	1.09893	3137999	3138340	342	b2991	hybF	16130891	NP_417465.1		Cytoplasmic	CPR	0
83	629	666.351	459.775	0.68999	3138333	3138821	489	b2992	hybE	16130892	NP_417466.1				0
244	1345	1935.17	971.228	0.501883	3138814	3139308	495	b2993	hybD	16130893	NP_417467.1		Cytoplasmic	CPR	0
340	2395	783.327	502.389	0.641353	3139308	3141011	1704	b2994	hybC	16130894	NP_417468.1				0
329	2281	1095.51	691.537	0.631248	3141008	3142186	1179	b2995	hybB	16130895	NP_417469.1	multipass		MPR	0
414	2370	1646.71	858.292	0.521217	3142176	3143162	987	b2996	hybA	16130896	NP_417470.1				0
480	2906	1684.01	928.26	0.55122	3143165	3144283	1119	b2997	hybO	16130897	NP_417471.1				0
163	2295	614.71	788.018	1.28193	3145919	3146959	1041	b3001	yghZ	16130899	NP_417474.1		Cytoplasmic	CPR	1
51	893	404.481	644.837	1.59423	3146999	3147493	495	b3002	yqhA	16130900	NP_417475.1	multipass		MPR	1
8	70	35.4879	28.2721	0.79667	3147684	3148568	885	b3003	yghA	16130901	NP_417476.1		Cytoplasmic	CPR	1
9	118	82.9405	99.0094	1.19374	3148840	3149265	426	b3005	exbD	16130903	NP_417478.1				0
35	367	186.945	178.477	0.954703	3149272	3150006	735	b3006	exbB	16130904	NP_417479.1	multipass		MPR	0
9	113	29.7413	33.999	1.14316	3150258	3151445	1188	b3008	metC	16130906	NP_417481.1		Cytoplasmic	CPR	1
90	1875	535.343	1015.46	1.89683	3151585	3152244	660	b3009	yghB	16130907	NP_417482.1	multipass		MPR	1
113	863	381.118	265.01	0.695349	3153377	3154540	1164	b3011	yqhD	16130909	NP_417484.1		Cytoplasmic	CPR	0
41	374	194.396	161.453	0.830535	3154645	3155472	828	b3012	dkgA	90111527	NP_417485.4		Cytoplasmic	CPR	0
17	216	30.0628	34.778	1.15685	3156949	3159168	2220	b4469	ygiQ	49176302	YP_026196.1		Cytoplasmic	CPR	1
42	450	116.692	113.835	0.975514	3159279	3160691	1413	b3017	ftsP	16130913	NP_417489.1		Secreted		1
29	250	50.3982	39.5574	0.784897	3161737	3163995	2259	b3019	parC	16130915	NP_417491.1				1
22	195	53.7119	43.3464	0.807016	3164133	3165740	1608	b3020	ygiS	16130916	NP_417492.1		Secreted		1
6	104	48.7683	76.9645	1.57817	3166771	3167253	483	b3023	ygiV	49176303	YP_026197.1				1
139	1993	1388.53	1812.67	1.30546	3167306	3167698	393	b3024	ygiW	16130920	NP_417496.1				1
4	32	11.6321	8.47267	0.728384	3168506	3169855	1350	b3026	qseC	16130922	NP_417498.1	multipass		MPR	0
14	46	94.4362	28.2513	0.299158	3170552	3171133	582	b3028	mdaB	16130924	NP_417500.1				1
62	804	772.707	912.325	1.18069	3171164	3171478	315	b3029	ygiN	16130925	NP_417501.1		Cytoplasmic	CPR	1
86	828	178.353	156.345	0.876602	3171526	3173418	1893	b3030	parE	16130926	NP_417502.1		Cytoplasmic	CPR	0
28	412	188.872	253.034	1.33971	3173447	3174028	582	b3031	yqiA	16130927	NP_417503.1		Cytoplasmic	CPR	0
210	3056	995.686	1319.25	1.32497	3174028	3174855	828	b3032	cpdA	16130928	NP_417504.1		Cytoplasmic	CPR	0
35	847	324.834	715.726	2.20336	3174880	3175302	423	b3033	yqiB	16130929	NP_417505.1				0
39	522	243.029	296.165	1.21864	3175303	3175932	630	b3034	nudF	16130930	NP_417506.1		Cytoplasmic	CPR	0
52	504	137.749	121.559	0.882465	3176137	3177618	1482	b3035	tolC	90111528	NP_417507.2		Secreted		0
107	701	625.098	372.866	0.596492	3177766	3178437	672	b3037	ygiB	145698308	NP_417509.3				0
131	992	442.968	305.41	0.689463	3178443	3179603	1161	b3038	ygiC	16130934	NP_417510.1		Cytoplasmic	CPR	0
6	86	29.8544	38.9606	1.30502	3179641	3180429	789	b3039	ygiD	226524747	NP_417511.2				1
34	551	172.453	254.457	1.47551	3180572	3181345	774	b3040	zupT	16130936	NP_417512.1	multipass		MPR	1
75	1046	450.212	571.686	1.26982	3181835	3182488	654	b3041	ribB	16130937	NP_417513.1		Cytoplasmic	CPR	1
44	631	593.599	775.069	1.30571	3182862	3183152	291	b3042	yqiC	90111530	NP_417514.4		Cytoplasmic	CPR	1
32	719	625.011	1278.61	2.04573	3189761	3189961	201	b3049	glgS	16130945	NP_417521.1				1
9	149	56.0836	84.5376	1.50735	3190230	3190859	630	b3050	yqiJ	16130946	NP_417522.1	multipass		MPR	0
26	192	61.4152	41.2928	0.672355	3190886	3192547	1662	b3051	yqiK	16130947	NP_417523.1				0
39	353	106.77	87.9892	0.824101	3193342	3194775	1434	b3052	rfaE	16130948	NP_417524.1		Cytoplasmic	CPR	1
56	701	77.3839	88.1964	1.13973	3194823	3197663	2841	b3053	glnE	16130949	NP_417525.1				0
21	217	63.3201	59.5734	0.940829	3197686	3198987	1302	b3054	ygiF	16130950	NP_417526.1		Cytoplasmic	CPR	0
15	141	94.8273	81.158	0.855851	3199229	3199849	621	b3055	ygiM	16130951	NP_417527.1				0
92	1421	291.508	409.946	1.4063	3199913	3201151	1239	b3056	cca	16130952	NP_417528.1		Cytoplasmic	CPR	0
30	207	143.279	90.0124	0.628231	3201332	3202153	822	b3057	bacA	16130953	NP_417529.1				1
6	131	38.115	75.7682	1.98788	3202716	3203333	618	b3059	ygiH	16130955	NP_417531.1				1
10	166	42.0777	63.5961	1.5114	3203346	3204278	933	b3060	ttdR	16130956	NP_417532.1		Cytoplasmic	CPR	1
11	121	42.5881	42.6532	1.00153	3207552	3208565	1014	b3064	tsaD	16130960	NP_417536.1		Secreted		1
49	1782	890.586	2948.89	3.31117	3208803	3209018	216	b3065	rpsU	16130961	NP_417537.1		Cytoplasmic	CPR	0
8	179	17.9879	36.6448	2.0372	3209129	3210874	1746	b3066	dnaG	16130962	NP_417538.1		Cytoplasmic	CPR	0
56	323	119.353	62.6783	0.525152	3211069	3212910	1842	b3067	rpoD	16130963	NP_417539.1		Cytoplasmic	CPR	0
19	186	147.123	131.132	0.891312	3212989	3213495	507	b3068	mug	16130964	NP_417540.1		Cytoplasmic	CPR	1
11	104	69.2057	59.5734	0.860818	3214801	3215424	624	b3071	yqjI	16130966	NP_417542.1		Cytoplasmic	CPR	1
23	176	65.4308	45.5866	0.696715	3217516	3218895	1380	b3073	patA	145698310	NP_417544.5		Cytoplasmic	CPR	1
11	45	129.683	48.3028	0.372469	3218937	3219269	333	b3074	ygjH	16130969	NP_417545.1		Cytoplasmic	CPR	1
77	1117	307.206	405.753	1.32079	3219488	3220471	984	b3075	ebgR	16130970	NP_417546.1		Cytoplasmic	CPR	1
4	70	6.67661	10.6381	1.59334	3226910	3229261	2352	b3080	ygjK	16130975	NP_417551.1		Secreted		0
28	282	54.4447	49.9249	0.916983	3229687	3231705	2019	b3081	fadH	16130976	NP_417552.1		Cytoplasmic	CPR	1
129	1860	513.105	673.596	1.31279	3235333	3236319	987	b3087	ygjR	145698311	NP_417558.2		Cytoplasmic	CPR	1
49	308	154.511	88.4271	0.572302	3237966	3239210	1245	b3089	sstT	16130984	NP_417560.1	multipass		MPR	1
194	1607	511.838	386.026	0.754197	3239849	3241336	1488	b3091	uxaA	16130986	NP_417562.1		Cytoplasmic	CPR	0
100	877	277.838	221.851	0.798491	3241351	3242763	1413	b3092	uxaC	16130987	NP_417563.1		Cytoplasmic	CPR	0
120	1177	331.996	296.482	0.893029	3243126	3244544	1419	b3093	exuT	16130988	NP_417564.1	multipass		MPR	1
72	890	363.785	409.424	1.12545	3244674	3245450	777	b3094	exuR	90111537	NP_417565.2		Cytoplasmic	CPR	1
46	644	272.382	347.197	1.27467	3245795	3246457	663	b3095	yqjA	16130990	NP_417566.1	multipass		MPR	0
15	507	153.353	471.933	3.07742	3246461	3246844	384	b3096	mzrA	16130991	NP_417567.1				0
42	492	446.845	476.588	1.06656	3246991	3247359	369	b3097	yqjC	90111538	NP_417568.2				0
74	551	949.388	643.627	0.677939	3247397	3247702	306	b3098	yqjD	16130993	NP_417569.1				0
69	357	668.848	315.077	0.471074	3247705	3248109	405	b3099	yqjE	16130994	NP_417570.1	multipass		MPR	0
41	152	536.533	181.103	0.337544	3248099	3248398	300	b3100	yqjK	16130995	NP_417571.1				0
53	1155	568.497	1127.99	1.98416	3250326	3250691	366	b3103	yhaH	16130998	NP_417574.1	multipass		MPR	1
6	76	26.2599	30.2848	1.15327	3251340	3252236	897	b3105	yhaJ	16131000	NP_417576.1		Cytoplasmic	CPR	1
4	22	95.1721	47.6588	0.500764	3253065	3253229	165	b3107	yhaL	90111540	NP_417578.2				0
39	426	116.787	116.148	0.994524	3253363	3254673	1311	b4470	yhaM	49176312	YP_026202.1		Cytoplasmic	CPR	0
31	424	91.3673	113.78	1.2453	3254701	3256032	1332	b3110	yhaO	145698312	YP_026203.3	multipass		MPR	0
1490	18468	4285.36	4836.05	1.12851	3256307	3257671	1365	b4471	tdcG	49176314	YP_026204.1		Cytoplasmic	CPR	0
892	9556	8979.12	8758.21	0.975398	3257743	3258132	390	b3113	tdcF	90111542	NP_417583.4		Cytoplasmic	CPR	0
3459	26141	5917	4071.4	0.688085	3258146	3260440	2295	b3114	tdcE	49176316	YP_026205.1		Cytoplasmic	CPR	0
1518	30572	4929.23	9038.61	1.83368	3260474	3261682	1209	b3115	tdcD	145698313	NP_417585.2		Cytoplasmic	CPR	0
2278	36840	6714.03	9885.97	1.47244	3261708	3263039	1332	b3116	tdcC	16131009	NP_417586.1	multipass		MPR	0
2011	31132	7974.63	11240.2	1.4095	3263061	3264050	990	b3117	tdcB	16131010	NP_417587.1		Cytoplasmic	CPR	0
375	9053	1567.83	3446.12	2.19802	3264149	3265087	939	b3118	tdcA	16131011	NP_417588.1		Cytoplasmic	CPR	0
748	7807	2562.42	2435.03	0.950283	3268647	3269792	1146	b3124	garK	145698314	NP_417593.4		Cytoplasmic	CPR	0
689	4666	3056.4	1884.54	0.616589	3269889	3270773	885	b3125	garR	145698315	NP_417594.3		Cytoplasmic	CPR	0
324	4098	1649.77	1899.86	1.15159	3270809	3271579	771	b3126	garL	16131018	NP_417595.1		Cytoplasmic	CPR	0
385	6720	1132.17	1799.25	1.5892	3271595	3272929	1335	b3127	garP	16131019	NP_417596.1	multipass		MPR	0
2468	25882	6163.48	5885.04	0.954824	3273304	3274875	1572	b3128	garD	16131020	NP_417597.1		Cytoplasmic	CPR	1
23	263	268.734	279.782	1.04111	3275024	3275359	336	b3129	prlF	16131021	NP_417598.1				0
30	629	253.281	483.506	1.90897	3275359	3275823	465	b3130	yhaV	16131022	NP_417599.1				0
17	333	82.3944	146.948	1.78347	3275878	3276687	810	b3131	agaR	16131023	NP_417600.1		Cytoplasmic	CPR	1
4	18	41.8757	17.1572	0.409716	3278723	3279097	375	b3134	agaW	N/A	N/A	multipass		MPR	0
4	99	28.2944	63.7597	2.25344	3279093	3279647	555	b3135	agaA	N/A	N/A				0
6	131	9.3584	18.6034	1.98788	3286836	3289352	2517	b3144	yraJ	16131036	NP_417613.1		Secreted		0
9	94	32.3559	30.7687	0.950946	3289363	3290454	1092	b3145	yraK	16131037	NP_417614.1				0
28	293	53.9636	51.4139	0.952752	3291422	3293458	2037	b3147	lpoA	16131039	NP_417616.1				1
11	85	109.051	76.7234	0.703553	3293416	3293811	396	b3148	yraN	16131040	NP_417617.1				1
21	211	139.497	127.614	0.914816	3293831	3294421	591	b3149	diaA	16131041	NP_417618.1		Cytoplasmic	CPR	1
21	185	143.13	114.803	0.80209	3294431	3295006	576	b3150	yraP	16131042	NP_417619.1		Secreted		1
14	210	52.7972	72.1062	1.36572	3295120	3296160	1041	b3151	yraQ	16131043	NP_417620.1	multipass		MPR	1
11	213	67.8999	119.709	1.76302	3296233	3296868	636	b3152	yraR	90111547	NP_417621.2		Cytoplasmic	CPR	1
9	99	68.0783	68.1823	1.00153	3296996	3297514	519	b3153	yhbO	90111548	NP_417622.2		Cytoplasmic	CPR	1
25	338	221.05	272.106	1.23097	3297494	3297937	444	b3154	yhbP	16131046	NP_417623.1				1
21	467	272.089	550.907	2.02473	3297988	3298290	303	b3155	yhbQ	16131047	NP_417624.1				1
328	4045	2554.92	2868.75	1.12283	3298277	3298780	504	b3156	yhbS	16131048	NP_417625.1		Cytoplasmic	CPR	0
427	5770	3193.02	3928.44	1.23032	3298774	3299298	525	b3157	yhbT	16131049	NP_417626.1				0
17	187	67.0075	67.1098	1.00153	3299507	3300502	996	b3158	yhbU	16131050	NP_417627.1		Cytoplasmic	CPR	0
14	104	62.5277	42.291	0.676357	3300511	3301389	879	b3159	yhbV	90111549	NP_417628.2		Cytoplasmic	CPR	0
12	146	46.7363	51.7722	1.10775	3301470	3302477	1008	b3160	yhbW	16131052	NP_417629.1		Cytoplasmic	CPR	1
15	244	47.2994	70.0526	1.48105	3302595	3303839	1245	b3161	mtr	16131053	NP_417630.1	multipass		MPR	1
397	2121	824.636	401.128	0.48643	3303993	3305882	1890	b3162	deaD	90111550	NP_417631.2		Cytoplasmic	CPR	0
11	93	533.14	410.395	0.769769	3305875	3305955	81	b4685	yrbN	226524750	YP_002791258.1				0
671	10074	2976.55	4068.77	1.36694	3306062	3306946	885	b3163	nlpI	16131055	NP_417632.1				1
582	4504	1069.68	753.705	0.704605	3307055	3309190	2136	b3164	pnp	145698316	NP_417633.4		Cytoplasmic	CPR	1
23	420	334.424	556.019	1.66262	3309437	3309706	270	b3165	rpsO	16131057	NP_417634.1		Cytoplasmic	CPR	0
31	214	128.784	80.9442	0.628525	3309855	3310799	945	b3166	truB	16131058	NP_417635.1		Cytoplasmic	CPR	0
13	52	126.955	46.2361	0.364192	3310799	3311200	402	b3167	rbfA	16131059	NP_417636.1		Cytoplasmic	CPR	0
341	1821	500.828	243.509	0.486212	3311364	3314036	2673	b3168	infB	16131060	NP_417637.1		Cytoplasmic	CPR	0
151	1026	398.389	246.461	0.618644	3314061	3315548	1488	b3169	nusA	16131061	NP_417638.1		Cytoplasmic	CPR	0
56	835	485.315	658.859	1.35759	3315576	3316028	453	b3170	rimP	226524751	NP_417639.6		Cytoplasmic	CPR	0
17	143	49.6573	38.0313	0.765874	3316659	3318002	1344	b3172	argG	16131063	NP_417640.1		Cytoplasmic	CPR	1
173	863	2039.55	926.34	0.454187	3320195	3320527	333	b3175	secG	16131065	NP_417642.1	multipass		MPR	1
166	1558	487.063	416.213	0.854535	3320755	3322092	1338	b3176	glmM	16131066	NP_417643.1		Cytoplasmic	CPR	0
10	147	46.2409	61.889	1.33841	3322085	3322933	849	b3177	folP	90111553	NP_417644.4		Cytoplasmic	CPR	0
255	1457	517.36	269.143	0.520223	3323023	3324957	1935	b3178	ftsH	16131068	NP_417645.1	multipass		MPR	0
137	2106	853.716	1194.87	1.39961	3325057	3325686	630	b3179	rlmE	16131069	NP_417646.1		Cytoplasmic	CPR	0
29	494	387.244	600.598	1.55096	3325812	3326105	294	b3180	yhbY	16131070	NP_417647.1		Cytoplasmic	CPR	1
21	237	172.836	177.596	1.02754	3326261	3326737	477	b3181	greA	90111554	NP_417648.4		Cytoplasmic	CPR	1
6	104	16.4261	25.9232	1.57817	3326985	3328418	1434	b3182	dacB	16131072	NP_417649.1		Secreted		1
50	487	167.342	148.4	0.886808	3328604	3329776	1173	b3183	obgE	16131073	NP_417650.1		Cytoplasmic	CPR	0
18	422	73.1525	156.149	2.13457	3329792	3330757	966	b3184	yhbE	16131074	NP_417651.1	multipass		MPR	0
118	1442	1795.54	1997.79	1.11264	3330884	3331141	258	b3185	rpmA	16131075	NP_417652.1		Cytoplasmic	CPR	0
121	2184	1522.52	2502.08	1.64338	3331162	3331473	312	b3186	rplU	16131076	NP_417653.1		Cytoplasmic	CPR	0
44	605	177.713	222.481	1.25191	3331732	3332703	972	b3187	ispB	16131077	NP_417654.1		Cytoplasmic	CPR	1
31	323	96.5883	91.6296	0.948661	3333257	3334516	1260	b3189	murA	16131079	NP_417656.1		Cytoplasmic	CPR	0
12	141	160.239	171.426	1.06981	3334985	3335278	294	b3191	mlaB	90111556	NP_417658.4				0
19	132	117.282	74.1858	0.632544	3335278	3335913	636	b3192	mlaC	16131082	NP_417659.1				0
10	92	71.1204	59.5734	0.837642	3335932	3336483	552	b3193	mlaD	16131083	NP_417660.1				0
21	274	105.291	125.081	1.18796	3336488	3337270	783	b3194	mlaE	16131084	NP_417661.1	multipass		MPR	0
41	677	198.716	298.75	1.5034	3337278	3338087	810	b3195	mlaF	16131085	NP_417662.1				0
21	392	84.2974	143.269	1.69956	3338297	3339274	978	b3196	yrbG	16131086	NP_417663.1	multipass		MPR	0
44	502	175.012	181.799	1.03877	3339288	3340274	987	b3197	kdsD	16131087	NP_417664.1		Cytoplasmic	CPR	0
34	384	235.412	242.076	1.02831	3340295	3340861	567	b3198	kdsC	16131088	NP_417665.1		Cytoplasmic	CPR	0
9	80	61.3414	49.6445	0.809316	3340858	3341433	576	b3199	lptC	16131089	NP_417666.1				0
19	129	133.676	82.6341	0.618168	3341402	3341959	558	b3200	lptA	16131090	NP_417667.1				0
19	205	102.743	100.93	0.98236	3341966	3342691	726	b3201	lptB	16131091	NP_417668.1				0
108	669	295.671	166.756	0.563992	3342739	3344172	1434	b3202	rpoN	16131092	NP_417669.1		Cytoplasmic	CPR	0
12	150	163.577	186.167	1.1381	3344195	3344482	288	b3203	hpf	16131093	NP_417670.1		Cytoplasmic	CPR	0
24	204	191.505	148.207	0.773908	3344600	3345091	492	b3204	ptsN	16131094	NP_417671.1		Cytoplasmic	CPR	0
34	360	156.116	150.501	0.964038	3345137	3345991	855	b3205	rapZ	16131095	NP_417672.1				0
43	481	266.685	271.61	1.01847	3346474	3347106	633	b3207	yrbL	16131097	NP_417674.1		Cytoplasmic	CPR	1
38	456	204.64	223.584	1.09258	3347103	3347831	729	b3208	mtgA	16131098	NP_417675.1				0
34	638	204.096	348.696	1.70849	3347828	3348481	654	b3209	elbB	90111557	NP_417676.2		Cytoplasmic	CPR	0
66	954	110.871	145.913	1.31606	3348711	3351047	2337	b3210	arcB	49176326	YP_026207.1	multipass		MPR	1
5	84	21.1067	32.285	1.52961	3351143	3352072	930	b3211	yhcC	16131101	NP_417678.1		Cytoplasmic	CPR	1
36	242	31.0344	18.9944	0.612045	3352654	3357207	4554	b3212	gltB	16131102	NP_417679.1				0
8	133	22.133	33.5022	1.51367	3357220	3358638	1419	b3213	gltD	16131103	NP_417680.1		Cytoplasmic	CPR	0
7	38	11.5369	5.70224	0.494261	3360829	3363210	2382	b3216	yhcD	16131106	NP_417683.1		Secreted		0
4	29	13.9214	9.18952	0.660098	3365849	3366976	1128	b3220	yhcG	16131110	NP_417687.1		Cytoplasmic	CPR	1
6	61	50.6561	46.8901	0.925655	3367036	3367500	465	b3221	yhcH	16131111	NP_417688.1				0
8	27	45.5171	13.9868	0.307287	3368369	3369058	690	b3223	nanE	16131113	NP_417690.1				0
23	221	60.5597	52.9808	0.874853	3369106	3370596	1491	b3224	nanT	90111559	NP_417691.4	multipass		MPR	0
12	160	52.696	63.9715	1.21397	3370705	3371598	894	b3225	nanA	16131115	NP_417692.1		Cytoplasmic	CPR	0
16	230	79.3101	103.802	1.30882	3371720	3372511	792	b3226	nanR	49176329	NP_417693.3		Cytoplasmic	CPR	1
4	21	11.4791	5.48703	0.478002	3372891	3374258	1368	b3227	dcuD	16131117	NP_417694.1	multipass		MPR	1
69	274	543.943	196.664	0.361553	3374301	3374798	498	b3228	sspB	16131118	NP_417695.1		Cytoplasmic	CPR	0
105	802	645.092	448.619	0.695433	3374804	3375442	639	b3229	sspA	16131119	NP_417696.1		Cytoplasmic	CPR	0
52	201	519.451	182.813	0.351936	3375837	3376229	393	b3230	rpsI	16131120	NP_417697.1		Cytoplasmic	CPR	0
72	513	658.884	427.429	0.648717	3376245	3376673	429	b3231	rplM	16131121	NP_417698.1		Cytoplasmic	CPR	0
7	208	24.3625	65.911	2.70543	3376892	3378019	1128	b3232	yhcM	16131122	NP_417699.1		Cytoplasmic	CPR	1
92	1571	905.208	1407.37	1.55474	3378213	3378611	399	b3233	yhcB	90111560	NP_417700.2				1
6	157	17.2186	41.0221	2.38242	3378765	3380132	1368	b3234	degQ	16131124	NP_417701.1		Secreted		0
8	135	29.4071	45.1821	1.53644	3380222	3381289	1068	b3235	degS	16131125	NP_417702.1		Secreted		0
567	5015	2370.56	1909.01	0.805301	3381352	3382290	939	b3236	mdh	16131126	NP_417703.1				1
7	215	58.3459	163.163	2.79647	3382725	3383195	471	b3237	argR	16131127	NP_417704.1		Cytoplasmic	CPR	1
15	166	223.06	224.754	1.0076	3383560	3383823	264	b3238	yhcN	90111561	NP_417705.2				1
5	115	71.902	150.57	2.0941	3383879	3384151	273	b3239	yhcO	16131129	NP_417706.1				1
5	71	9.97421	12.8955	1.29288	3384243	3386210	1968	b3240	aaeB	16131130	NP_417707.1	multipass		MPR	0
4	58	16.8311	22.2203	1.3202	3386216	3387148	933	b3241	aaeA	16131131	NP_417708.1				0
19	230	80.2055	88.3993	1.10216	3387542	3388471	930	b3243	aaeR	16131133	NP_417710.1		Cytoplasmic	CPR	1
79	969	214.483	239.53	1.11678	3388605	3390050	1446	b3244	tldD	16131134	NP_417711.1		Cytoplasmic	CPR	1
33	331	34.0839	31.1268	0.913239	3390480	3394280	3801	b4472	yhdP	49176330	YP_026208.1				1
21	389	56.0836	94.588	1.68656	3394348	3395817	1470	b3247	rng	90111563	NP_417713.2		Cytoplasmic	CPR	1
28	295	185.057	177.517	0.959256	3395807	3396400	594	b3248	yhdE	16131136	NP_417714.1		Cytoplasmic	CPR	1
17	154	136.481	112.568	0.824788	3396409	3396897	489	b3249	mreD	16131137	NP_417715.1	multipass		MPR	0
22	217	78.2325	70.2578	0.898064	3396897	3398000	1104	b3250	mreC	16131138	NP_417716.1				0
46	604	172.978	206.795	1.1955	3398066	3399109	1044	b3251	mreB	90111564	NP_417717.2		Cytoplasmic	CPR	0
48	642	97.0844	118.226	1.21777	3399414	3401354	1941	b3252	csrD	16131140	NP_417718.1	multipass		MPR	1
125	1651	503.314	605.266	1.20256	3401506	3402480	975	b3253	yhdH	16131141	NP_417719.1				0
5	26	204.471	96.8069	0.47345	3402660	3402755	96	b4646	N/A	N/A	N/A				0
18	94	150.032	71.3364	0.475473	3403458	3403928	471	b3255	accB	16131143	NP_417721.1		Cytoplasmic	CPR	0
15	98	43.6205	25.9475	0.594847	3403939	3405288	1350	b3256	accC	16131144	NP_417722.1		Cytoplasmic	CPR	0
6	58	16.2225	14.2779	0.880131	3405629	3407080	1452	b3258	panF	90111565	NP_417724.4	multipass		MPR	0
4	94	17.8043	38.0946	2.13963	3407092	3407973	882	b3259	prmA	16131147	NP_417725.1		Cytoplasmic	CPR	0
32	133	130.049	49.2128	0.378418	3408302	3409267	966	b3260	dusB	16131148	NP_417726.1		Cytoplasmic	CPR	0
5	48	66.0917	57.7682	0.874061	3409293	3409589	297	b3261	fis	16131149	NP_417727.1		Cytoplasmic	CPR	0
12	84	15.1724	9.66989	0.637336	3413055	3416159	3105	b3266	acrF	16131154	NP_417732.1	multipass		MPR	0
7	54	36.2068	25.4306	0.70237	3420458	3421216	759	b3271	yhdZ	16131159	NP_417737.1				0
66	1003	466.858	645.969	1.38365	3427258	3427812	555	b3279	yrdA	90111568	NP_417738.4		Cytoplasmic	CPR	1
10	171	152.165	236.908	1.55692	3427788	3428045	258	b3280	yrdB	16131161	NP_417739.1				0
43	502	206.119	219.091	1.06293	3428042	3428860	819	b3281	aroE	16131162	NP_417740.1		Cytoplasmic	CPR	0
33	326	226.096	203.361	0.899444	3428865	3429437	573	b3282	tsaC	16131163	NP_417741.1				0
109	1743	788.062	1147.36	1.45593	3429442	3429984	543	b3283	yrdD	49176335	YP_026210.1		Cytoplasmic	CPR	0
203	4385	1681.32	3306.7	1.96673	3430013	3430486	474	b3284	smg	16131165	NP_417743.1		Cytoplasmic	CPR	1
70	772	244.275	245.284	1.00413	3430458	3431582	1125	b4473	smf	49176336	YP_026211.1		Cytoplasmic	CPR	1
41	1031	315.607	722.591	2.28952	3431712	3432221	510	b3287	def	16131166	NP_417745.1		Cytoplasmic	CPR	0
75	1113	310.589	419.653	1.35115	3432236	3433183	948	b3288	fmt	16131167	NP_417746.1		Cytoplasmic	CPR	0
24	263	73.039	72.8736	0.997734	3433229	3434518	1290	b3289	rsmB	16131168	NP_417747.1		Cytoplasmic	CPR	1
16	223	45.6163	57.8862	1.26898	3434540	3435916	1377	b3290	trkA	16131169	NP_417748.1				1
38	474	362.974	412.231	1.1357	3436046	3436456	411	b3291	mscL	16131170	NP_417749.1	multipass		MPR	1
4	19	71.705	31.0108	0.432478	3436453	3436671	219	b4550	arfA	94541124	YP_588467.1				1
7	60	64.5092	50.3438	0.780411	3436727	3437152	426	b3292	zntR	16131171	NP_417751.1		Cytoplasmic	CPR	0
57	232	582.743	215.954	0.370581	3437638	3438021	384	b3294	rplQ	16131173	NP_417753.1		Cytoplasmic	CPR	0
401	841	1590.17	303.644	0.190951	3438062	3439051	990	b3295	rpoA	16131174	NP_417754.1		Cytoplasmic	CPR	0
[truncated: 732 more rows]

## Sheet: CspE pull down high Mg
reads_extract	reads_pull down	RPKM extract	RPKM pull down	extract/pull down	from	to	length	bxxx	gene	x_ref	ip_number	uniprot_annotation	p_sort_annotation	integrative_annotation	single gene operon
45	104	28.4404	37.5654	1.32085	337	2799	2463	b0002	thrA	16127996	NP_414543.1		Cytoplasmic	CPR	0
85	249	141.816	237.431	1.67422	2801	3733	933	b0003	thrB	16127997	NP_414544.1		Cytoplasmic	CPR	0
102	147	123.37	101.615	0.823662	3734	5020	1287	b0004	thrC	16127998	NP_414545.1		Cytoplasmic	CPR	0
6	20	31.4472	59.9091	1.90507	5234	5530	297	b0005	yaaX	16127999	NP_414546.1				1
30	65	60.1019	74.4238	1.23829	5683	6459	777	b0006	yaaA	16128000	NP_414547.1		Cytoplasmic	CPR	1
175	818	190.365	508.549	2.67145	6529	7959	1431	b0007	yaaJ	16128001	NP_414548.1	multipass		MPR	1
1652	1569	2695.56	1463.17	0.542806	8238	9191	954	b0008	talB	16128002	NP_414549.1		Cytoplasmic	CPR	1
86	121	227.672	183.074	0.804116	9306	9893	588	b0009	mog	16128003	NP_414550.1		Cytoplasmic	CPR	1
19	71	52.1625	111.402	2.13568	9928	10494	567	b0010	satP	16128004	NP_414551.1	multipass		MPR	1
502	587	407.633	272.418	0.668292	12163	14079	1917	b0014	dnaK	16128008	NP_414555.1		Cytoplasmic	CPR	0
88	165	121.118	129.79	1.0716	14168	15298	1131	b0015	dnaJ	16128009	NP_414556.1		Cytoplasmic	CPR	0
20	78	148.251	330.442	2.22893	16751	16960	210	b0018	mokC	16128012	NP_414559.1		Secreted		1
78	465	104.043	354.488	3.40714	17489	18655	1167	b0019	nhaA	16128013	NP_414560.1	multipass		MPR	0
22	77	37.7992	75.6105	2.00032	18715	19620	906	b0020	nhaR	16128014	NP_414561.1		Cytoplasmic	CPR	0
124	61	731.148	205.563	0.281151	20815	21078	264	b0023	rpsT	16128017	NP_414564.1		Cytoplasmic	CPR	1
13	37	92.4032	150.306	1.62663	21181	21399	219	b0024	yaaY	16128018	NP_414565.1				0
153	544	252.83	513.768	2.03207	21407	22348	942	b0025	ribF	16128019	NP_414566.1		Cytoplasmic	CPR	0
454	606	250.875	191.384	0.762866	22391	25207	2817	b0026	ileS	16128020	NP_414567.1		Cytoplasmic	CPR	0
74	262	232.71	470.886	2.02349	25207	25701	495	b0027	lspA	16128021	NP_414568.1	multipass		MPR	0
31	54	107.235	106.758	0.995552	25826	26275	450	b0028	fkpB	16128022	NP_414569.1		Cytoplasmic	CPR	0
77	114	126.037	106.646	0.846147	26277	27227	951	b0029	ispH	16128023	NP_414570.1		Cytoplasmic	CPR	0
135	91	229.668	88.4789	0.385247	27293	28207	915	b0030	rihC	16128024	NP_414571.1				1
71	189	134.454	204.555	1.52137	28374	29195	822	b0031	dapB	16128025	NP_414572.1		Cytoplasmic	CPR	1
8	25	10.8382	19.3571	1.786	29651	30799	1149	b0032	carA	16128026	NP_414573.1		Cytoplasmic	CPR	0
39	80	18.842	22.0894	1.17235	30817	34038	3222	b0033	carB	16128027	NP_414574.1				0
59	185	231.923	415.62	1.79206	34300	34695	396	b0034	caiF	90111079	NP_414576.4		Cytoplasmic	CPR	1
11	24	11.0187	13.7398	1.24695	36271	37824	1554	b0037	caiC	221800780	NP_414579.4		Cytoplasmic	CPR	0
7	13	8.9462	9.49545	1.06139	37898	39115	1218	b0038	caiB	16128032	NP_414580.1		Cytoplasmic	CPR	1
22	72	29.9615	56.041	1.87043	39244	40386	1143	b0039	caiA	16128033	NP_414581.1		Cytoplasmic	CPR	0
28	76	23.3955	36.2928	1.55127	47769	49631	1863	b0047	kefC	16128041	NP_414589.1	multipass		MPR	0
13	40	42.159	74.1375	1.75852	49823	50302	480	b0048	folA	16128042	NP_414590.1		Cytoplasmic	CPR	1
48	91	88.6342	96.0358	1.08351	50380	51222	843	b0049	apaH	16128043	NP_414591.1		Cytoplasmic	CPR	0
49	93	201.786	218.882	1.08472	51229	51606	378	b0050	apaG	16128044	NP_414592.1				0
126	227	238.609	245.682	1.02964	51609	52430	822	b0051	rsmA	16128045	NP_414593.1		Cytoplasmic	CPR	0
108	234	169.815	210.281	1.23829	52427	53416	990	b0052	pdxA	16128046	NP_414594.1		Cytoplasmic	CPR	0
242	346	292.701	239.176	0.817132	53416	54702	1287	b0053	surA	16128047	NP_414595.1		Secreted		0
534	693	352.97	261.795	0.741692	54755	57109	2355	b0054	lptD	16128048	NP_414596.1		Secreted		0
73	165	139.258	179.893	1.29179	57364	58179	816	b0055	djlA	16128049	NP_414597.1				1
20	38	53.7699	58.3881	1.08589	58474	59052	579	b4659	N/A	N/A	N/A				1
28	114	66.0392	153.667	2.3269	59687	60346	660	b0058	rluA	16128052	NP_414600.1		Cytoplasmic	CPR	0
43	82	23.0256	25.0951	1.08988	60358	63264	2907	b0059	hepA	16128053	NP_414601.1		Cytoplasmic	CPR	0
104	252	68.8309	95.3197	1.38484	63429	65780	2352	b0060	polB	16128054	NP_414602.1		Cytoplasmic	CPR	1
246	392	550.191	501.067	0.910715	65855	66550	696	b0061	araD	16128055	NP_414603.1		Cytoplasmic	CPR	1
684	1521	1211.31	1539.43	1.27088	70387	71265	879	b0064	araC	16128058	NP_414606.1		Cytoplasmic	CPR	1
263	982	535.158	1142.01	2.13397	71351	72115	765	b0065	yabI	16128059	NP_414607.1	multipass		MPR	1
18	58	40.0851	73.8193	1.84157	72229	72927	699	b0066	thiQ	16128060	NP_414608.1				0
26	47	41.1307	42.4935	1.03313	74497	75480	984	b0068	tbpA	16128062	NP_414610.1		Secreted		0
46	65	43.24	34.9199	0.807583	75644	77299	1656	b0069	sgrR	16128063	NP_414611.1		Cytoplasmic	CPR	0
35	151	46.2106	113.942	2.4657	77621	78799	1179	b0070	setA	49175994	YP_025293.1	multipass		MPR	1
4	20	5.70197	16.294	2.8576	80867	81958	1092	b0073	leuB	90111082	NP_414615.4		Cytoplasmic	CPR	0
14	29	13.8632	16.4121	1.18386	81958	83529	1572	b0074	leuA	16128068	NP_414616.1		Cytoplasmic	CPR	0
25	74	22.56	38.1647	1.6917	85630	87354	1725	b0077	ilvI	90111084	YP_025294.2		Cytoplasmic	CPR	0
436	886	675.318	784.309	1.16139	88028	89032	1005	b0080	cra	16128073	NP_414622.1		Cytoplasmic	CPR	1
165	283	559.576	548.521	0.980244	89634	90092	459	b0081	mraZ	16128074	NP_414623.1		Cytoplasmic	CPR	0
239	318	394.943	300.328	0.760433	90094	91035	942	b0082	rsmH	16128075	NP_414624.1		Cytoplasmic	CPR	0
76	115	323.236	279.535	0.864801	91032	91397	366	b0083	ftsL	16128076	NP_414625.1		Cytoplasmic	CPR	0
260	961	229.047	483.845	2.11243	91413	93179	1767	b0084	ftsI	16128077	NP_414626.1				0
412	825	431.005	493.254	1.14443	93166	94653	1488	b0085	murE	16128078	NP_414627.1		Cytoplasmic	CPR	0
232	389	265.74	254.653	0.958282	94650	96008	1359	b0086	murF	16128079	NP_414628.1		Cytoplasmic	CPR	0
199	512	286.03	420.592	1.47044	96002	97084	1083	b0087	mraY	16128080	NP_414629.1	multipass		MPR	0
245	412	289.58	278.311	0.961087	97087	98403	1317	b0088	murD	16128081	NP_414630.1		Cytoplasmic	CPR	0
253	657	316.329	469.478	1.48415	98403	99647	1245	b0089	ftsW	16128082	NP_414631.1	multipass		MPR	0
278	569	405.192	473.98	1.16977	99644	100711	1068	b0090	murG	16128083	NP_414632.1				0
274	432	288.969	260.385	0.901083	100765	102240	1476	b0091	murC	16128084	NP_414633.1		Cytoplasmic	CPR	0
253	674	427.611	651.058	1.52255	102233	103153	921	b0092	ddlB	16128085	NP_414634.1		Cytoplasmic	CPR	0
324	835	606.92	893.933	1.4729	103155	103985	831	b0093	ftsQ	16128086	NP_414635.1				0
497	948	612.549	667.766	1.09014	103982	105244	1263	b0094	ftsA	16128087	NP_414636.1		Cytoplasmic	CPR	0
890	1541	1202.61	1190.06	0.989565	105305	106456	1152	b0095	ftsZ	16128088	NP_414637.1				0
685	1260	1161.54	1221.09	1.05126	106557	107474	918	b0096	lpxC	16128089	NP_414638.1		Cytoplasmic	CPR	0
183	147	555.292	254.929	0.45909	107705	108217	513	b0097	secM	90111085	NP_414639.2		Cytoplasmic	CPR	0
548	625	315.239	205.481	0.651825	108279	110984	2706	b0098	secA	16128091	NP_414640.1				0
10	41	39.9138	93.5274	2.34323	111044	111433	390	b0099	mutT	16128092	NP_414641.1		Cytoplasmic	CPR	0
23	62	180.822	278.577	1.54062	111649	111846	198	b0101	yacG	16128094	NP_414643.1				0
50	71	104.613	84.8994	0.811559	111856	112599	744	b0102	zapD	16128095	NP_414644.1		Cytoplasmic	CPR	0
71	135	177.973	193.402	1.08669	112599	113219	621	b0103	coaE	16128096	NP_414645.1		Cytoplasmic	CPR	0
65	217	96.9171	184.918	1.908	113444	114487	1044	b0104	guaC	16128097	NP_414646.1		Cytoplasmic	CPR	1
13	54	14.6005	34.6617	2.37401	115714	117099	1386	b0107	hofB	16128100	NP_414649.1		Cytoplasmic	CPR	0
91	158	158.45	157.231	0.99231	117752	118645	894	b0109	nadC	16128102	NP_414651.1		Cytoplasmic	CPR	1
66	134	186.12	215.966	1.16036	118733	119284	552	b0110	ampD	16128103	NP_414652.1		Cytoplasmic	CPR	0
101	333	183.884	346.495	1.88432	119281	120135	855	b0111	ampE	16128104	NP_414653.1	multipass		MPR	0
43	123	48.7158	79.6412	1.63481	120178	121551	1374	b0112	aroP	16128105	NP_414654.1	multipass		MPR	1
217	238	441.556	276.78	0.626829	122092	122856	765	b0113	pdhR	16128106	NP_414655.1		Cytoplasmic	CPR	0
887	625	518.295	208.721	0.402706	123017	125680	2664	b0114	aceE	16128107	NP_414656.1		Cytoplasmic	CPR	0
746	1661	613.445	780.618	1.27251	125695	127587	1893	b0115	aceF	16128108	NP_414657.1		Cytoplasmic	CPR	0
1476	1959	1612.35	1223.04	0.758542	127912	129336	1425	b0116	lpd	16128109	NP_414658.1		Cytoplasmic	CPR	1
1519	2223	910.136	761.237	0.836399	131615	134212	2598	b0118	acnB	16128111	NP_414660.1		Cytoplasmic	CPR	1
173	187	741.869	458.305	0.617771	134388	134750	363	b0119	yacL	90111086	NP_414661.2				1
59	114	115.524	127.573	1.10429	134788	135582	795	b0120	speD	16128113	NP_414662.1		Cytoplasmic	CPR	0
40	81	71.8172	83.1161	1.15733	135598	136464	867	b0121	speE	16128114	NP_414663.1		Cytoplasmic	CPR	0
37	148	165.505	378.357	2.28608	136570	136917	348	b0122	yacC	90111087	NP_414664.4				0
50	91	50.1818	52.1974	1.04017	137083	138633	1551	b0123	cueO	16128116	NP_414665.1		Secreted		1
34	57	22.1354	21.2087	0.958137	138835	141225	2391	b0124	gcd	16128117	NP_414666.1	multipass		MPR	1
60	215	173.926	356.192	2.04795	141431	141967	537	b0125	hpt	90111088	NP_414667.4		Cytoplasmic	CPR	1
54	220	126.785	295.208	2.32842	142008	142670	663	b0126	can	16128119	NP_414668.1		Cytoplasmic	CPR	1
50	88	83.9611	84.4544	1.00588	142779	143705	927	b0127	yadG	16128120	NP_414669.1				0
53	413	107.006	476.557	4.45355	143702	144472	771	b0128	yadH	16128121	NP_414670.1	multipass		MPR	0
100	447	352.979	901.755	2.5547	144577	145017	441	b0129	yadI	16128122	NP_414671.1		Cytoplasmic	CPR	1
71	237	89.8547	171.42	1.90775	145081	146310	1230	b0130	yadE	16128123	NP_414672.1				1
57	147	232.883	343.251	1.47392	146314	146694	381	b0131	panD	16128124	NP_414673.1				1
19	97	32.7532	95.566	2.91776	146968	147870	903	b0132	yadD	16128125	NP_414674.1		Cytoplasmic	CPR	1
221	459	403.776	479.284	1.187	147944	148795	852	b0133	panC	16128126	NP_414675.1		Cytoplasmic	CPR	0
157	175	307.412	195.835	0.637045	148807	149601	795	b0134	panB	16128127	NP_414676.1		Cytoplasmic	CPR	0
89	212	99.0993	134.911	1.36137	157729	159126	1398	b0143	pcnB	162135892	NP_414685.4		Cytoplasmic	CPR	0
12	44	20.1507	42.2272	2.09557	159186	160112	927	b0144	gluQ	226524698	NP_414686.3		Cytoplasmic	CPR	0
280	567	955.831	1106.21	1.15733	160149	160604	456	b0145	dksA	16128138	NP_414687.1		Cytoplasmic	CPR	0
269	583	593.951	735.697	1.23865	160782	161486	705	b0146	sfsA	16128139	NP_414688.1		Cytoplasmic	CPR	0
75	171	48.0444	62.605	1.30307	162105	164534	2430	b0148	hrpB	162135893	NP_414690.4				1
129	240	79.2135	84.2273	1.06329	164730	167264	2535	b0149	mrcB	16128142	NP_414691.1				1
41	251	28.4413	99.5108	3.49882	167484	169727	2244	b0150	fhuA	16128143	NP_414692.1		Secreted		0
10	55	19.5067	61.3168	3.14336	169778	170575	798	b0151	fhuC	16128144	NP_414693.1				0
36	115	28.2597	51.5934	1.82569	171462	173444	1983	b0153	fhuB	16128146	NP_414695.1	multipass		MPR	0
157	321	190.782	222.933	1.16852	173602	174882	1281	b0154	hemL	16128147	NP_414696.1		Cytoplasmic	CPR	1
107	363	117.131	227.105	1.9389	175107	176528	1422	b0155	clcA	16128148	NP_414697.1	multipass		MPR	1
37	81	166.944	208.874	1.25117	176610	176954	345	b0156	erpA	16128149	NP_414698.1				1
9	47	22.4515	67.0089	2.98461	177001	177624	624	b0157	yadS	16128150	NP_414699.1	multipass		MPR	0
23	45	44.6975	49.9804	1.11819	177662	178462	801	b0158	btuF	16128151	NP_414700.1		Secreted		0
164	264	365.22	336.005	0.920008	178455	179153	699	b0159	mtn	16128152	NP_414701.1		Cytoplasmic	CPR	1
42	87	43.069	50.9879	1.18386	179237	180754	1518	b0160	dgt	16128153	NP_414702.1		Cytoplasmic	CPR	1
111	121	121.254	75.5422	0.623009	180884	182308	1425	b0161	degP	16128154	NP_414703.1		Secreted		1
281	649	377.733	498.604	1.31999	182463	183620	1158	b0162	cdaR	90111093	NP_414704.4		Cytoplasmic	CPR	1
141	319	567.147	733.329	1.29301	183709	184095	387	b0163	yaeH	16128156	NP_414705.1		Cytoplasmic	CPR	1
16	65	30.6349	71.1283	2.3218	184257	185069	813	b0164	yaeI	90111094	NP_414706.2				1
242	332	456.614	358.017	0.784069	185123	185947	825	b0166	dapD	16128159	NP_414708.1		Cytoplasmic	CPR	1
111	187	64.6415	62.2389	0.962832	185978	188650	2673	b0167	glnD	16128160	NP_414709.1				1
157	250	307.412	279.764	0.910064	188712	189506	795	b0168	map	16128161	NP_414710.1				1
815	1086	1747.47	1330.8	0.76156	189874	190599	726	b0169	rpsB	16128162	NP_414711.1		Cytoplasmic	CPR	0
555	556	1014.01	580.57	0.57255	190857	191708	852	b0170	tsf	16128163	NP_414712.1		Cytoplasmic	CPR	0
69	122	147.945	149.5	1.01051	191855	192580	726	b0171	pyrH	16128164	NP_414713.1		Cytoplasmic	CPR	1
240	562	669.522	896.028	1.33831	192872	193429	558	b0172	frr	16128165	NP_414714.1		Cytoplasmic	CPR	1
96	246	124.843	182.835	1.46452	193521	194717	1197	b0173	dxr	16128166	NP_414715.1				1
141	484	288.039	565.08	1.96181	194903	195664	762	b0174	ispU	16128167	NP_414716.1		Cytoplasmic	CPR	0
158	562	286.654	582.731	2.03288	195677	196534	858	b0175	cdsA	90111095	NP_414717.2	multipass		MPR	0
292	711	335.949	467.51	1.39161	196546	197898	1353	b0176	rseP	16128169	NP_414718.1	multipass		MPR	0
593	818	379.403	299.11	0.78837	197928	200360	2433	b0177	bamA	16128170	NP_414719.1		Secreted		0
296	244	948.076	446.656	0.471118	200482	200967	486	b0178	hlpA	16128171	NP_414720.1		Secreted		0
268	449	406.607	389.33	0.95751	200971	201996	1026	b0179	lpxD	16128172	NP_414721.1		Cytoplasmic	CPR	0
106	322	361.85	628.218	1.73613	202101	202556	456	b0180	fabZ	16128173	NP_414722.1		Cytoplasmic	CPR	1
135	302	266.345	340.525	1.27851	202560	203348	789	b0181	lpxA	16128174	NP_414723.1		Cytoplasmic	CPR	0
77	214	104.318	165.696	1.58838	203348	204496	1149	b0182	lpxB	16128175	NP_414724.1		Cytoplasmic	CPR	0
37	68	96.4751	101.334	1.05036	204493	205089	597	b0183	rnhB	16128176	NP_414725.1		Cytoplasmic	CPR	0
139	292	62.1225	74.5845	1.2006	205126	208608	3483	b0184	dnaE	16128177	NP_414726.1		Cytoplasmic	CPR	0
106	346	171.879	320.645	1.86553	208621	209580	960	b0185	accA	16128178	NP_414727.1		Cytoplasmic	CPR	1
84	168	61.0446	69.7765	1.14304	209679	211820	2142	b0186	ldcC	16128179	NP_414728.1		Cytoplasmic	CPR	1
24	47	95.7931	107.214	1.11923	211877	212266	390	b0187	yaeR	90111096	NP_414729.4		Cytoplasmic	CPR	1
32	67	38.3467	45.8865	1.19662	212331	213629	1299	b0188	tilS	16128181	NP_414730.1		Cytoplasmic	CPR	1
53	101	323.537	352.371	1.08912	213678	213932	255	b0189	rof	90111097	NP_414731.2		Cytoplasmic	CPR	0
89	156	689.258	690.475	1.00177	213925	214125	201	b4406	yaeP	49176004	YP_026160.1				0
46	57	131.145	92.8756	0.708188	214291	214836	546	b0190	yaeQ	16128183	NP_414732.1		Cytoplasmic	CPR	0
23	28	84.6399	58.8894	0.695764	214833	215255	423	b0191	arfB	16128184	NP_414733.1				0
62	114	135.741	142.644	1.05086	215269	215979	711	b0192	nlpE	16128185	NP_414734.1		Secreted		0
231	422	209.182	218.402	1.04408	217057	218775	1719	b0194	proS	16128187	NP_414736.1		Cytoplasmic	CPR	1
28	49	61.562	61.5719	1.00016	218887	219594	708	b0195	yaeB	16128188	NP_414737.1				0
40	48	153.742	105.44	0.685824	219591	219995	405	b0196	rcsF	16128189	NP_414738.1		Secreted		0
116	226	221.287	246.398	1.11348	220113	220928	816	b0197	metQ	16128190	NP_414739.1				0
34	81	80.9261	110.186	1.36156	220968	221621	654	b0198	metI	16128191	NP_414740.1	multipass		MPR	0
17	39	25.6423	33.6205	1.31113	221614	222645	1032	b0199	metN	16128192	NP_414741.1				0
130	253	351.325	390.767	1.11227	222833	223408	576	b0200	gmhB	16128193	NP_414742.1		Cytoplasmic	CPR	1
30	31	58.0835	34.3024	0.590571	229167	229970	804	b0207	dkgB	16128194	NP_414743.1		Cytoplasmic	CPR	1
43	60	73.1535	58.3377	0.79747	229967	230881	915	b0208	yafC	16128195	NP_414744.1		Cytoplasmic	CPR	1
92	206	178.79	228.799	1.27971	231122	231922	801	b0209	yafD	16128196	NP_414745.1				0
27	56	67.3545	79.8404	1.18538	231926	232549	624	b0210	yafE	16128197	NP_414746.1				0
112	259	128.288	169.551	1.32164	232597	233955	1359	b0211	mltD	16128198	NP_414747.1				1
36	57	74.1256	67.0768	0.904907	234027	234782	756	b0212	gloB	16128199	NP_414748.1		Cytoplasmic	CPR	1
45	130	96.8862	159.965	1.65106	234816	235538	723	b0213	yafS	90111099	NP_414749.2		Cytoplasmic	CPR	1
33	52	109.763	98.85	0.900577	235535	236002	468	b0214	rnhA	16128201	NP_414750.1		Cytoplasmic	CPR	1
27	76	57.417	92.3681	1.60872	236067	236798	732	b0215	dnaQ	16128202	NP_414751.1		Cytoplasmic	CPR	1
93	231	187.766	266.549	1.41958	239419	240189	771	b0219	yafV	16128205	NP_414754.1		Cytoplasmic	CPR	1
131	226	430.21	424.179	0.985982	240343	240816	474	b0220	ivy	16128206	NP_414755.1		Secreted		1
25	61	15.9165	22.1958	1.39451	240859	243303	2445	b0221	fadE	90111100	NP_414756.2				1
103	124	276.915	190.53	0.688044	243543	244121	579	b0222	lpcA	16128208	NP_414757.1		Cytoplasmic	CPR	1
58	81	117.559	93.8303	0.798158	244327	245094	768	b0223	yafJ	16128209	NP_414758.1		Cytoplasmic	CPR	1
84	188	176.461	225.714	1.27912	245065	245805	741	b0224	yafK	16128210	NP_414759.1				1
44	28	262.422	95.4414	0.363695	246242	246502	261	b0226	dinJ	16128212	NP_414761.1				0
18	33	56.264	58.9527	1.04779	247637	248134	498	b0228	rayT	16128214	NP_414763.1				1
10	26	9.08721	13.5032	1.48595	248358	250070	1713	b0229	N/A	N/A	N/A				1
44	74	64.8599	62.3429	0.961193	250898	251953	1056	b0231	dinB	16128217	NP_414766.1		Cytoplasmic	CPR	0
559	811	596.818	494.86	0.829165	254259	255716	1458	b0237	pepD	16128223	NP_414772.1		Cytoplasmic	CPR	1
24	69	81.3929	133.738	1.64312	255977	256435	459	b0238	gpt	16128224	NP_414773.1		Cytoplasmic	CPR	0
99	184	123.781	131.482	1.06222	256527	257771	1245	b0239	frsA	16128225	NP_414774.1				0
100	431	387.223	953.829	2.46325	257829	258230	402	b0240	crl	16128226	NP_414775.1		Cytoplasmic	CPR	1
112	181	157.92	145.858	0.923618	259612	260715	1104	b0242	proB	16128228	NP_414777.1		Cytoplasmic	CPR	0
121	208	150.202	147.566	0.982448	260727	261980	1254	b0243	proA	16128229	NP_414778.1		Cytoplasmic	CPR	0
7	10	31.861	26.0132	0.816458	262552	262893	342	b0245	ykfI	16128230	NP_414779.1		Cytoplasmic	CPR	0
12	20	40.6964	38.7647	0.952534	263972	264430	459	b0248	yafX	16128233	NP_414782.1				0
23	46	76.5015	87.4443	1.14304	264844	265311	468	b0250	ykfB	16128235	NP_414784.1				0
18	61	32.43	62.811	1.93682	267321	268184	864	b0253	ykfA	90111103	NP_414787.4				0
11	80	12.1959	50.6923	4.15651	274549	275952	1404	b0260	mmuP	90111105	NP_414794.4	multipass		MPR	0
58	232	96.7685	221.221	2.28608	275939	276871	933	b0261	mmuM	16128246	NP_414795.1		Cytoplasmic	CPR	0
67	66	52.9953	29.8358	0.56299	282425	284392	1968	b0269	yagF	16128254	NP_414803.1		Cytoplasmic	CPR	0
15	20	16.8833	12.8655	0.762027	284619	286001	1383	b0270	yagG	16128255	NP_414804.1	multipass		MPR	0
26	13	25.1227	7.17905	0.28576	286013	287623	1611	b0271	yagH	16128256	NP_414805.1				0
43	174	91.4419	211.474	2.31266	290724	291455	732	b0276	yagJ	16128261	NP_414810.1				1
28	86	31.1105	54.6109	1.75538	294920	296320	1401	b0281	intF	16128266	NP_414815.1				1
10	26	7.07885	10.5188	1.48595	297960	300158	2199	b0284	paoC	16128269	NP_414818.1				0
34	166	86.0581	240.133	2.79036	302215	302829	615	b0287	yagU	16128272	NP_414821.1	multipass		MPR	1
16	35	15.1498	18.9402	1.2502	304398	306041	1644	b0290	N/A	16128275	NP_414824.1				0
17	44	10.4762	15.4967	1.47923	306031	308556	2526	b0291	N/A	16128276	NP_414825.1		Secreted		0
241	298	521.041	368.216	0.706693	320832	321551	720	b0306	ykgE	16128291	NP_414840.1				0
358	557	390.25	347.014	0.889209	321562	322989	1428	b0307	ykgF	16128292	NP_414841.1		Cytoplasmic	CPR	0
168	221	375.74	282.49	0.751821	322982	323677	696	b0308	ykgG	90111113	NP_414842.4				0
9	19	9.51103	11.4755	1.20654	326485	327957	1473	b0312	betB	16128297	NP_414846.1		Cytoplasmic	CPR	0
8	10	21.1788	15.1301	0.7144	327971	328558	588	b0313	betI	49176011	NP_414847.3				0
20	120	15.3062	52.4868	3.42912	328687	330720	2034	b0314	betT	16128299	NP_414848.1	multipass		MPR	1
33	34	37.1432	21.8714	0.588839	340349	341731	1383	b0324	yahJ	16128309	NP_414858.1				0
17	38	25.2027	32.1969	1.27752	342108	343157	1050	b0325	yahK	16128310	NP_414859.1		Cytoplasmic	CPR	1
35	215	221.473	777.54	3.51077	344628	344873	246	b0327	yahM	90111114	NP_414861.2				1
52	463	120.454	612.959	5.08873	344890	345561	672	b0328	yahN	16128313	NP_414862.1	multipass		MPR	1
67	252	377.88	812.29	2.1496	345708	345983	276	b0329	yahO	16128314	NP_414863.1				1
17	27	21.0023	19.0639	0.907709	354146	355405	1260	b0336	codB	16128321	NP_414870.1	multipass		MPR	0
60	83	72.7401	57.5086	0.790603	355395	356678	1284	b0337	codA	16128322	NP_414871.1		Cytoplasmic	CPR	0
63	121	90.5524	99.3977	1.09768	365652	366734	1083	b0345	lacI	49176012	NP_414879.3		Cytoplasmic	CPR	0
17	10	31.73	10.6673	0.336188	366811	367644	834	b0346	mhpR	145698223	NP_414880.2		Cytoplasmic	CPR	0
34	37	60.0065	37.3209	0.621949	370448	371329	882	b0349	mhpC	90111115	NP_414883.4		Cytoplasmic	CPR	0
35	62	67.2621	68.0967	1.01241	371339	372148	810	b0350	mhpD	90111116	NP_414884.2		Cytoplasmic	CPR	0
34	78	55.6527	72.9682	1.31113	372145	373095	951	b0351	mhpF	16128336	NP_414885.1		Cytoplasmic	CPR	0
36	67	55.2653	58.7836	1.06366	373092	374105	1014	b0352	mhpE	16128337	NP_414886.1		Cytoplasmic	CPR	0
16	81	20.5497	59.4568	2.89332	374683	375894	1212	b0353	mhpT	90111117	NP_414887.2	multipass		MPR	1
54	99	155.664	163.103	1.04779	375996	376535	540	b0354	yaiL	90111118	NP_414888.4		Cytoplasmic	CPR	1
57	101	79.9355	80.9502	1.01269	377686	378795	1110	b0356	frmA	16128341	NP_414890.1		Cytoplasmic	CPR	0
45	43	253.8	138.605	0.546119	378830	379105	276	b0357	frmR	162135894	NP_414891.4		Cytoplasmic	CPR	0
126	288	201.166	262.789	1.30633	387977	388951	975	b0369	hemB	90111123	NP_414903.4		Cytoplasmic	CPR	1
35	146	47.0487	112.167	2.38406	394354	395511	1158	b0376	ampH	16128361	NP_414910.1		Secreted		1
35	134	44.6211	97.6357	2.18811	395863	397083	1221	b0377	sbmA	16128362	NP_414911.1	multipass		MPR	0
43	146	61.1283	118.62	1.94051	397096	398190	1095	b0378	yaiW	16128363	NP_414912.1				0
4	12	20.1507	34.5495	1.71456	398249	398557	309	b0379	yaiY	16128364	NP_414913.1	multipass		MPR	1
27	231	197.32	964.832	4.88967	398817	399029	213	b0380	yaiZ	90111125	NP_414914.2	multipass		MPR	1
91	272	129.364	220.991	1.70828	399053	400147	1095	b0381	ddlA	16128366	NP_414915.1		Cytoplasmic	CPR	1
63	224	375.74	763.531	2.03207	400610	400870	261	b0382	iraP	16128367	NP_414916.1				1
69	177	75.8531	111.206	1.46607	400971	402386	1416	b0383	phoA	49176017	NP_414917.2		Secreted		0
13	33	63.0414	91.4594	1.45078	402505	402825	321	b0384	psiF	162135895	NP_414918.4				0
48	71	92.2452	77.9817	0.845374	404059	404868	810	b0386	proC	16128371	NP_414920.1		Cytoplasmic	CPR	1
56	76	189.917	147.306	0.775635	404988	405446	459	b0387	yaiI	90111127	NP_414921.2		Cytoplasmic	CPR	1
39	154	115.636	260.964	2.25677	405629	406153	525	b0388	aroL	16128373	NP_414922.1		Cytoplasmic	CPR	0
8	42	18.3674	55.1111	3.00048	406652	407329	678	b0390	aroM	16128375	NP_414924.1		Cytoplasmic	CPR	0
121	351	660.889	1095.67	1.65788	407401	407685	285	b0391	yaiE	16128376	NP_414925.1				1
129	187	220.909	183.019	0.828483	409368	410276	909	b0394	mak	90111128	NP_414928.2		Cytoplasmic	CPR	1
860	5365	1129.71	4027.83	3.56536	410521	411705	1185	b0396	araJ	49176018	NP_414930.3	multipass		MPR	1
39	63	19.291	17.81	0.923225	411831	414977	3147	b0397	sbcC	16128382	NP_414931.1		Cytoplasmic	CPR	0
20	54	25.8793	39.9344	1.5431	414974	416176	1203	b0398	sbcD	16128383	NP_414932.1		Cytoplasmic	CPR	0
25	67	56.3999	86.3863	1.53167	416366	417055	690	b0399	phoB	16128384	NP_414933.1		Cytoplasmic	CPR	0
48	189	56.605	127.382	2.25036	418815	420134	1320	b0401	brnQ	16128386	NP_414935.1	multipass		MPR	0
51	118	57.7792	76.4037	1.32234	420210	421583	1374	b0402	proY	16128387	NP_414936.1	multipass		MPR	0
54	98	46.2368	47.957	1.0372	421739	423556	1818	b0403	malZ	16128388	NP_414937.1				1
17	43	45.4688	65.7302	1.44561	423561	424142	582	b0404	acpH	16128389	NP_414938.1		Cytoplasmic	CPR	1
37	107	53.7774	88.882	1.65278	424235	425305	1071	b0405	queA	16128390	NP_414939.1		Cytoplasmic	CPR	1
109	512	150.42	403.813	2.68457	425361	426488	1128	b0406	tgt	16128391	NP_414940.1		Cytoplasmic	CPR	0
124	435	579.649	1162.16	2.00493	426511	426843	333	b0407	yajC	16128392	NP_414941.1				0
150	388	126.351	186.788	1.47833	426871	428718	1848	b0408	secD	16128393	NP_414942.1	multipass		MPR	0
130	419	208.192	383.502	1.84205	428729	429700	972	b0409	secF	16128394	NP_414943.1	multipass		MPR	0
24	57	107.354	145.719	1.35736	429829	430176	348	b0410	yajD	16128395	NP_414944.1				1
128	69	225.141	69.3626	0.308085	430353	431237	885	b0411	tsx	16128396	NP_414945.1		Secreted		1
168	198	581.145	391.446	0.673578	432226	432675	450	b0413	nrdR	16128398	NP_414947.1		Cytoplasmic	CPR	0
215	314	303.15	253.035	0.834686	432679	433782	1104	b0414	ribD	16128399	NP_414948.1		Cytoplasmic	CPR	0
132	103	436.255	194.552	0.445959	433871	434341	471	b0415	ribE	16128400	NP_414949.1		Cytoplasmic	CPR	0
173	177	641.187	374.924	0.584735	434361	434780	420	b0416	nusB	16128401	NP_414950.1		Cytoplasmic	CPR	0
64	115	101.866	104.611	1.02695	434858	435835	978	b0417	thiL	16128402	NP_414951.1		Cytoplasmic	CPR	0
127	561	380.911	961.645	2.52459	435813	436331	519	b0418	pgpA	16128403	NP_414952.1	multipass		MPR	0
181	247	288.976	225.378	0.77992	436385	437359	975	b0419	yajO	90111130	NP_414953.2		Cytoplasmic	CPR	0
187	329	156.249	157.109	1.00551	437539	439401	1863	b0420	dxs	16128405	NP_414954.1		Cytoplasmic	CPR	0
87	174	150.475	171.999	1.14304	439426	440325	900	b0421	ispA	16128406	NP_414955.1		Cytoplasmic	CPR	0
71	105	454.82	384.417	0.845206	440325	440567	243	b0422	xseB	16128407	NP_414956.1		Cytoplasmic	CPR	0
68	117	73.0513	71.8351	0.983351	440773	442221	1449	b0423	thiI	16128408	NP_414957.1		Cytoplasmic	CPR	1
25	60	65.8476	90.3198	1.37165	442275	442865	591	b0424	yajL	90111131	NP_414958.4		Cytoplasmic	CPR	0
85	93	145.081	90.7209	0.62531	442828	443739	912	b0425	panE	16128410	NP_414959.1		Cytoplasmic	CPR	0
162	221	512.552	399.619	0.779667	443907	444398	492	b0426	yajQ	90111132	NP_414960.2		Cytoplasmic	CPR	1
20	89	22.8079	58.0065	2.54327	444526	445890	1365	b0427	yajR	90111133	NP_414961.4	multipass		MPR	1
270	1352	471.709	1349.95	2.86184	446039	446929	891	b0428	cyoE	16128413	NP_414962.1	multipass		MPR	0
108	337	509.445	908.522	1.78336	446941	447270	330	b0429	cyoD	16128414	NP_414963.1	multipass		MPR	0
55	107	139.212	154.785	1.11187	447270	447884	615	b0430	cyoC	16128415	NP_414964.1	multipass		MPR	0
173	393	135.19	175.518	1.29831	447874	449865	1992	b0431	cyoB	16128416	NP_414965.1	multipass		MPR	0
128	141	210.179	132.321	0.629565	449887	450834	948	b0432	cyoA	16128417	NP_414966.1	multipass		MPR	0
49	208	51.677	125.371	2.42605	451294	452769	1476	b0433	ampG	16128418	NP_414967.1	multipass		MPR	1
55	90	147.867	138.288	0.935215	452813	453391	579	b0434	yajG	90111134	NP_414968.4				1
174	983	851.745	2750.08	3.22876	453696	454013	318	b0435	bolA	90111135	NP_414969.4				1
468	750	560.821	513.655	0.915898	454357	455655	1299	b0436	tig	16128421	NP_414970.1		Cytoplasmic	CPR	1
288	457	718.448	651.555	0.906892	455901	456524	624	b0437	clpP	16128422	NP_414971.1		Cytoplasmic	CPR	0
622	1259	759.395	878.486	1.15682	456650	457924	1275	b0438	clpX	16128423	NP_414972.1		Cytoplasmic	CPR	0
349	629	230.687	237.618	1.03005	458112	460466	2355	b0439	lon	16128424	NP_414973.1		Cytoplasmic	CPR	1
778	577	4436.13	1880.32	0.423865	460675	460947	273	b0440	hupB	16128425	NP_414974.1		Cytoplasmic	CPR	1
219	367	182.107	174.413	0.957753	461139	463010	1872	b0441	ppiD	16128426	NP_414975.1				1
8	15	33.4761	35.873	1.0716	463161	463532	372	b0442	ybaV	16128427	NP_414976.1				1
5	14	19.5067	31.2158	1.60026	463626	464024	399	b0443	fadM	16128428	NP_414977.1		Cytoplasmic	CPR	1
51	132	114.064	168.727	1.47923	464076	464771	696	b0444	queC	16128429	NP_414978.1		Cytoplasmic	CPR	1
70	132	64.0592	69.0381	1.07772	464836	466536	1701	b0445	ybaE	16128430	NP_414979.1				1
24	67	45.6158	72.7797	1.59549	466636	467454	819	b0446	cof	90111136	NP_414980.2		Cytoplasmic	CPR	1
29	41	98.3497	79.4677	0.808012	467607	468065	459	b0447	ybaO	90111137	NP_414981.4		Cytoplasmic	CPR	1
57	229	50.0442	114.907	2.29611	468095	469867	1773	b0448	mdlA	16128433	NP_414982.1	multipass		MPR	0
30	112	26.206	55.9152	2.13368	469860	471641	1782	b0449	mdlB	16128434	NP_414983.1	multipass		MPR	0
21	129	25.3997	89.1724	3.51077	472190	473476	1287	b0451	amtB	16128436	NP_414985.1	multipass		MPR	0
48	148	86.7812	152.925	1.76219	473525	474385	861	b0452	tesB	16128437	NP_414986.1		Cytoplasmic	CPR	1
48	88	130.399	136.63	1.04779	474603	475175	573	b0453	ybaY	49176025	NP_414987.3		Secreted		1
16	45	63.8621	102.652	1.6074	475206	475595	390	b0454	atl	16128439	NP_414988.1				1
296	29	4041.8	226.315	0.0559935	475672	475785	114	b0455	ffs	N/A	N/A				1
22	66	96.7402	165.867	1.71456	475896	476249	354	b0456	ybaA	16128440	NP_414989.1				1
39	120	39.1418	68.8318	1.75852	476291	477841	1551	b0457	ylaB	90111138	NP_414990.2	multipass		MPR	1
17	114	56.1844	215.329	3.83255	478005	478475	471	b0458	ylaC	90111139	NP_414991.4	multipass		MPR	1
19	47	135.051	190.93	1.41376	479314	479532	219	b0460	hha	16128444	NP_414993.1				0
322	803	159.123	226.79	1.42525	480478	483627	3150	b0462	acrB	16128446	NP_414995.1	multipass		MPR	0
136	107	177.306	79.7258	0.449652	483650	484843	1194	b0463	acrA	16128447	NP_414996.1				0
25	45	60.0555	61.7813	1.02874	484985	485632	648	b0464	acrR	16128448	NP_414997.1		Cytoplasmic	CPR	1
102	227	47.2129	60.0507	1.27191	485760	489122	3363	b0465	mscK	16128449	NP_414998.1	multipass		MPR	1
27	32	79.6008	53.9182	0.677357	489509	490036	528	b0467	priC	16128451	NP_415000.1		Cytoplasmic	CPR	0
30	59	84.5999	95.0894	1.12399	490636	491187	552	b0469	apt	16128453	NP_415002.1		Cytoplasmic	CPR	1
216	322	174.034	148.275	0.851989	491316	493247	1932	b0470	dnaX	16128454	NP_415003.1		Cytoplasmic	CPR	1
81	79	382.084	212.977	0.557409	493300	493629	330	b0471	ybaB	16128455	NP_415004.1				0
72	151	184.947	221.679	1.19861	493629	494234	606	b0472	recR	16128456	NP_415005.1		Cytoplasmic	CPR	0
199	237	165.211	112.452	0.680655	494344	496218	1875	b0473	htpG	16128457	NP_415006.1		Cytoplasmic	CPR	1
189	325	456.131	448.273	0.982773	496399	497043	645	b0474	adk	16128458	NP_415007.1		Cytoplasmic	CPR	1
35	93	56.7524	86.1849	1.51861	498238	499197	960	b0476	aes	16128460	NP_415009.1		Cytoplasmic	CPR	1
61	105	72.7624	71.5811	0.983765	499349	500653	1305	b0477	gsk	16128461	NP_415010.1		Cytoplasmic	CPR	1
88	280	81.6841	148.54	1.81847	500786	502462	1677	b0478	ybaL	16128462	NP_415011.1	multipass		MPR	1
25	85	31.8722	61.9331	1.94317	502700	503920	1221	b0479	fsr	16128463	NP_415012.1	multipass		MPR	1
228	279	214.709	150.159	0.69936	504138	505790	1653	b0480	ushA	16128464	NP_415013.1		Secreted		1
16	55	51.8879	101.939	1.9646	505827	506306	480	b0481	ybaK	16128465	NP_415014.1		Cytoplasmic	CPR	1
51	91	99.8598	101.834	1.01977	506510	507304	795	b0482	ybaP	16128466	NP_415015.1		Cytoplasmic	CPR	1
275	461	170.888	163.724	0.958076	508099	510603	2505	b0484	copA	16128468	NP_415017.1	multipass		MPR	1
43	57	71.7422	54.3516	0.757597	510865	511797	933	b0485	ybaS	16128469	NP_415018.1		Cytoplasmic	CPR	0
43	133	51.7676	91.5108	1.76773	511800	513092	1293	b0486	ybaT	16128470	NP_415019.1	multipass		MPR	0
86	92	328.115	200.607	0.611394	513217	513624	408	b0487	cueR	16128471	NP_415020.1		Cytoplasmic	CPR	1
55	103	186.525	199.638	1.0703	513625	514083	459	b0488	ybbJ	145698226	NP_415021.2	multipass		MPR	0
41	102	69.5231	98.85	1.42183	514080	514997	918	b0489	qmcA	16128473	NP_415022.1				0
15	21	34.4389	27.5555	0.800128	515143	515820	678	b0490	ybbL	16128474	NP_415023.1				0
37	60	73.8405	68.4346	0.92679	515807	516586	780	b0491	ybbM	90111141	NP_415024.4				0
73	81	132.906	84.2827	0.634153	516649	517503	855	b0492	ybbN	90111142	NP_415025.4		Cytoplasmic	CPR	1
52	96	99.9323	105.44	1.05511	517564	518373	810	b0493	ybbO	16128477	NP_415026.1		Cytoplasmic	CPR	0
35	88	86.8937	124.863	1.43697	518363	518989	627	b0494	tesA	16128478	NP_415027.1		Secreted		0
36	63	81.5706	81.5837	1.00016	518957	519643	687	b0495	ybbA	16128479	NP_415028.1				0
50	139	32.2285	51.2056	1.58883	519640	522054	2415	b0496	ybbP	16128480	NP_415029.1	multipass		MPR	0
34	44	12.3629	9.1438	0.739615	522485	526765	4281	b0497	rhsD	16128481	NP_415030.1		Secreted		0
43	99	61.1283	80.4341	1.31583	529356	530450	1095	b0503	ybbB	16128487	NP_415036.1		Cytoplasmic	CPR	1
144	407	274.701	443.735	1.61534	532235	533050	816	b0506	allR	16128490	NP_415039.1		Cytoplasmic	CPR	1
29	32	42.2683	26.6562	0.630643	550750	551817	1068	b0522	purK	16128506	NP_415055.1				0
112	95	352.209	170.741	0.484772	553166	553660	495	b0525	ppiB	16128509	NP_415058.1		Cytoplasmic	CPR	0
39	85	43.8015	54.5601	1.24562	553834	555219	1386	b0526	cysS	16128510	NP_415059.1		Cytoplasmic	CPR	1
11	27	32.8027	46.0164	1.40282	555255	555776	522	b0527	ybcI	16128511	NP_415060.1	multipass		MPR	1
27	25	197.32	104.419	0.529185	555884	556096	213	b0528	ybcJ	90111146	NP_415061.2				0
192	201	344.723	206.251	0.59831	556098	556964	867	b0529	folD	16128513	NP_415062.1		Cytoplasmic	CPR	0
16	43	74.7934	114.88	1.53596	567538	567870	333	b0543	emrE	16128526	NP_415075.1	multipass		MPR	1
20	122	41.5104	144.716	3.48627	582904	583653	750	b0564	appY	16128547	NP_415096.1		Cytoplasmic	CPR	1
268	222	437.295	207.026	0.473424	583903	584856	954	b0565	ompT	16128548	NP_415097.1		Secreted		1
90	74	6.57673	3.09051	0.469917	564025	585326	21302	N/A	N/A	N/A	N/A				1
58	80	30.3683	23.9395	0.788304	587205	590177	2973	b0568	nfrA	16128551	NP_415100.1		Secreted		0
26	120	18.0843	47.7024	2.63779	590164	592401	2238	b0569	nfrB	16128552	NP_415101.1	multipass		MPR	0
18	57	40.9642	74.1375	1.80981	593983	594666	684	b0571	cusR	16128554	NP_415103.1		Cytoplasmic	CPR	0
12	51	5.94137	14.4314	2.42896	597937	601080	3144	b0575	cusA	16128558	NP_415107.1	multipass		MPR	0
21	55	23.7396	35.5343	1.49684	601182	602558	1377	b0576	pheP	16128559	NP_415108.1	multipass		MPR	1
13	61	16.215	43.4845	2.68175	602639	603886	1248	b0577	ybdG	16128560	NP_415109.1	multipass		MPR	1
67	136	159.472	185.004	1.1601	603994	604647	654	b0578	nfsB	16128561	NP_415110.1				1
17	39	71.715	94.0281	1.31113	604741	605109	369	b0579	ybdF	16128562	NP_415111.1				1
11	46	68.7672	164.353	2.38999	605174	605422	249	b0580	ybdJ	16128563	NP_415112.1	multipass		MPR	1
58	158	80.6837	125.616	1.5569	605488	606606	1119	b0581	ybdK	16128564	NP_415113.1		Cytoplasmic	CPR	1
11	54	7.64079	21.4374	2.80565	609477	611717	2241	b0584	fepA	16128567	NP_415116.1	multipass	Secreted	MPR	0
10	63	4.00989	14.4379	3.60058	613380	617261	3882	b0586	entF	16128569	NP_415118.1		Cytoplasmic	CPR	0
251	737	185.525	311.335	1.67813	629117	631222	2106	b0598	cstA	16128581	NP_415130.1	multipass		MPR	1
37	93	290.887	417.866	1.43652	631405	631602	198	b4512	ybdD	94541100	YP_588442.1				1
49	231	70.0416	188.714	2.69431	631612	632700	1089	b0599	ybdH	16128582	NP_415132.1				1
311	156	858.359	246.074	0.286679	638168	638731	564	b0605	ahpC	16128588	NP_415138.1		Cytoplasmic	CPR	0
296	363	294.23	206.222	0.700885	638976	640541	1566	b0606	ahpF	90111152	NP_415139.2				0
350	315	1269.98	653.24	0.514368	640662	641090	429	b0607	uspG	16128590	NP_415140.1		Cytoplasmic	CPR	1
14	54	17.5891	38.7741	2.20444	641311	642549	1239	b0608	ybdR	16128591	NP_415141.1		Cytoplasmic	CPR	1
37	38	140.135	82.2548	0.586967	642780	643190	411	b0610	rnk	16128593	NP_415143.1		Cytoplasmic	CPR	1
53	71	102.233	78.2716	0.765622	643420	644226	807	b0611	rna	16128594	NP_415144.1		Secreted		1
6	23	6.37967	13.9767	2.19083	644340	645803	1464	b0612	citT	16128595	NP_415145.1	multipass		MPR	1
11	11	11.1696	6.38366	0.57152	647262	648794	1533	b0615	citF	16128598	NP_415148.1		Cytoplasmic	CPR	0
7	19	11.9873	18.5956	1.55127	648805	649713	909	b0616	citE	90111153	NP_415149.4		Cytoplasmic	CPR	0
32	144	30.0256	77.221	2.57184	651458	653116	1659	b0619	dpiB	16128602	NP_415152.1	multipass		MPR	0
106	388	242.296	506.879	2.09198	653085	653765	681	b0620	dpiA	16128603	NP_415153.1		Cytoplasmic	CPR	0
702	2557	788.427	1641.3	2.08173	653806	655191	1386	b0621	dcuC	16128604	NP_415154.1	multipass		MPR	1
18	54	49.9456	85.6348	1.71456	655780	656340	561	b0622	pagP	16128605	NP_415155.1		Secreted		1
4468	7754	33119.3	32849.3	0.991846	656515	656724	210	b0623	cspE	16128606	NP_415156.1		Cytoplasmic	csp	1
17	70	68.9137	162.176	2.35332	656778	657161	384	b0624	crcB	16128607	NP_415157.1	multipass		MPR	1
36	213	274.701	928.9	3.3815	658170	658373	204	b0627	tatE	16128610	NP_415160.1				1
149	220	240.103	202.612	0.843856	658474	659439	966	b0628	lipA	16128611	NP_415161.1		Cytoplasmic	CPR	1
30	60	38.5307	44.0421	1.14304	661975	663186	1212	b0632	dacA	16128615	NP_415165.1				1
68	139	97.2006	113.555	1.16825	663325	664413	1089	b0633	rlpA	16128616	NP_415166.1				0
47	110	65.7341	87.9259	1.3376	664424	665536	1113	b0634	mrdB	16128617	NP_415167.1	multipass		MPR	0
37	86	30.2816	40.226	1.3284	665539	667440	1902	b0635	mrdA	16128618	NP_415168.1				0
40	113	133.046	214.809	1.61454	667471	667938	468	b0636	rlmH	16128619	NP_415169.1				0
36	67	176.223	187.442	1.06366	667942	668259	318	b0637	rsfS	90111157	NP_415170.4		Cytoplasmic	CPR	0
26	47	63.0414	65.1302	1.03313	669154	669795	642	b0639	nadD	16128622	NP_415172.1		Cytoplasmic	CPR	0
26	92	39.2176	79.3099	2.0223	669797	670828	1032	b0640	holA	16128623	NP_415173.1				0
78	90	208.622	137.575	0.659447	670828	671409	582	b0641	lptE	16128624	NP_415174.1		Secreted		0
428	527	257.933	181.512	0.703718	671424	674006	2583	b0642	leuS	16128625	NP_415175.1		Cytoplasmic	CPR	0
421	333	1356.82	613.361	0.452058	674241	674723	483	b0643	ybeL	16128626	NP_415176.1		Cytoplasmic	CPR	1
24	43	38.1997	39.1155	1.02397	674793	675770	978	b0644	ybeQ	90111158	NP_415177.4		Secreted		1
150	252	249.461	239.521	0.960154	682700	683635	936	b0651	rihA	16128634	NP_415184.1				1
40	72	85.7652	88.2298	1.02874	683753	684478	726	b0652	gltL	16128635	NP_415185.1				0
22	96	50.7349	126.528	2.49391	684478	685152	675	b0653	gltK	16128636	NP_415186.1	multipass		MPR	0
27	80	56.7196	96.0486	1.69339	685152	685892	741	b0654	gltJ	16128637	NP_415187.1	multipass		MPR	0
78	137	133.573	134.084	1.00382	686062	686970	909	b0655	gltI	16128638	NP_415188.1		Secreted		0
77	134	77.8825	77.4614	0.994594	688566	690104	1539	b0657	lnt	16128640	NP_415190.1	multipass		MPR	0
196	277	347.1	280.356	0.80771	690129	691007	879	b0658	ybeX	16128641	NP_415191.1				0
87	130	289.375	247.125	0.853996	691097	691564	468	b0659	ybeY	16128642	NP_415192.1				0
145	150	216.823	128.192	0.591228	691561	692601	1041	b0660	ybeZ	145698230	NP_415193.2		Cytoplasmic	CPR	0
58	90	63.3579	56.1884	0.886842	692754	694178	1425	b0661	miaB	16128644	NP_415194.1		Cytoplasmic	CPR	1
208	301	275.324	227.708	0.827056	694324	695499	1176	b0662	ubiF	16128645	NP_415195.1		Cytoplasmic	CPR	1
166	229	155.196	122.36	0.788423	696736	698400	1665	b0674	asnB	16128650	NP_415200.1		Cytoplasmic	CPR	1
100	257	206.725	303.639	1.46881	698797	699549	753	b0675	umpH	16128651	NP_415201.1		Cytoplasmic	CPR	0
192	368	244.779	268.134	1.09541	699597	700817	1221	b0676	nagC	16128652	NP_415202.1		Cytoplasmic	CPR	0
120	168	162.573	130.079	0.800128	700826	701974	1149	b0677	nagA	16128653	NP_415203.1		Cytoplasmic	CPR	0
56	82	108.829	91.0753	0.836869	702034	702834	801	b0678	nagB	16128654	NP_415204.1		Cytoplasmic	CPR	0
419	836	334.993	381.997	1.14031	703167	705113	1947	b0679	nagE	16128655	NP_415205.1	multipass		MPR	1
216	254	201.942	135.718	0.672066	705316	706980	1665	b0680	glnS	16128656	NP_415206.1		Cytoplasmic	CPR	1
123	337	428.337	670.721	1.56587	709423	709869	447	b0683	fur	16128659	NP_415209.1		Cytoplasmic	CPR	0
24	67	429.417	685.133	1.59549	709862	709948	87	b4637	uof	157783150	YP_001491546.1				0
74	158	216.933	264.717	1.22027	710158	710688	531	b0684	fldA	16128660	NP_415210.1		Cytoplasmic	CPR	0
35	73	71.2187	84.8947	1.19203	711261	712025	765	b0686	ybfF	16128662	NP_415212.1				1
123	131	350.671	213.451	0.608692	712210	712755	546	b0687	seqA	16128663	NP_415213.1		Cytoplasmic	CPR	0
327	435	310.189	235.831	0.760279	712781	714421	1641	b0688	pgm	16128664	NP_415214.1		Cytoplasmic	CPR	0
7	57	8.2549	38.4167	4.65381	716169	717488	1320	b0692	potE	16128668	NP_415219.1	multipass		MPR	0
18	26	41.3267	34.1164	0.825529	720279	720956	678	b0694	kdpE	16128670	NP_415222.1		Cytoplasmic	CPR	0
81	143	46.96	47.3818	1.00898	720953	723637	2685	b0695	kdpD	16128671	NP_415223.1	multipass		MPR	0
62	189	466.239	812.29	1.74222	728357	728563	207	b0699	ybfA	16128675	NP_415228.1				1
38	73	14.104	15.4851	1.09792	728806	732999	4194	b0700	rhsC	16128676	NP_415229.1				0
16	20	48.8357	34.8883	0.7144	738224	738733	510	b0707	ybgA	16128682	NP_415235.1				0
52	104	57.0438	65.2034	1.14304	738730	740148	1419	b0708	phr	16128683	NP_415236.1		Cytoplasmic	CPR	0
133	189	278.27	226	0.81216	742050	742793	744	b0710	ybgI	16128685	NP_415238.1		Cytoplasmic	CPR	0
116	253	274.84	342.59	1.24651	742816	743472	657	b0711	ybgJ	16128686	NP_415239.1		Cytoplasmic	CPR	0
139	322	231.911	307.039	1.32395	743466	744398	933	b0712	ybgK	16128687	NP_415240.1		Cytoplasmic	CPR	0
85	128	180.019	154.932	0.860642	744388	745122	735	b0713	ybgL	16128688	NP_415241.1		Cytoplasmic	CPR	0
54	151	106.134	169.618	1.59814	745158	745949	792	b0714	nei	16128689	NP_415242.1		Cytoplasmic	CPR	0
112	486	166.517	412.961	2.47999	745946	746992	1047	b0715	abrB	90111163	NP_415243.4	multipass		MPR	1
823	647	997.752	448.29	0.4493	752408	753691	1284	b0720	gltA	16128695	NP_415248.1		Cytoplasmic	CPR	1
29	91	115.75	207.585	1.79339	754400	754789	390	b0721	sdhC	16128696	NP_415249.1	multipass		MPR	0
26	64	116.301	163.614	1.40682	754783	755130	348	b0722	sdhD	16128697	NP_415250.1	multipass		MPR	0
249	426	219.356	214.483	0.977782	755130	756896	1767	b0723	sdhA	16128698	NP_415251.1				0
113	168	245.328	208.454	0.849694	756912	757628	717	b0724	sdhB	16128699	NP_415252.1				0
743	766	412.77	243.209	0.589212	757929	760730	2802	b0726	sucA	16128701	NP_415254.1		Cytoplasmic	CPR	0
879	815	1123.39	595.292	0.529908	760745	761962	1218	b0727	sucB	16128702	NP_415255.1		Cytoplasmic	CPR	0
1065	1462	1420.58	1114.54	0.784566	762237	763403	1167	b0728	sucC	16128703	NP_415256.1		Cytoplasmic	CPR	0
687	906	1229.21	926.464	0.753708	763403	764272	870	b0729	sucD	16128704	NP_415257.1		Cytoplasmic	CPR	0
23	23	49.5196	28.3015	0.57152	764376	765098	723	b0730	mngR	16128705	NP_415258.1		Cytoplasmic	CPR	1
19	75	11.2286	25.3317	2.256	767201	769834	2634	b0732	mngB	16128707	NP_415260.1				0
3708	6537	3678.79	3706.59	1.00756	770681	772249	1569	b0733	cydA	90111166	NP_415261.2	multipass		MPR	0
2111	3717	2882.51	2900.73	1.00632	772265	773404	1140	b0734	cydB	16128709	NP_415262.1	multipass		MPR	0
97	203	1324.51	1584.2	1.19607	773419	773532	114	b4515	cydX	94541102	YP_588444.1				0
107	373	566.532	1128.71	1.99231	773532	773825	294	b0735	ybgE	16128710	NP_415263.1				0
53	122	203.708	267.993	1.31558	773975	774379	405	b0736	ybgC	16128711	NP_415264.1				0
44	114	98.8342	146.349	1.48076	774376	775068	693	b0737	tolQ	16128712	NP_415265.1	multipass		MPR	0
28	65	101.599	134.796	1.32674	775072	775500	429	b0738	tolR	16128713	NP_415266.1				0
102	217	125.416	152.491	1.21588	775565	776830	1266	b0739	tolA	16128714	NP_415267.1		Cytoplasmic	CPR	0
296	377	356.353	259.395	0.727916	776963	778255	1293	b0740	tolB	16128715	NP_415268.1		Secreted		0
844	710	2516.86	1210.06	0.480781	778290	778811	522	b0741	pal	16128716	NP_415269.1		Secreted		0
123	167	241.751	187.59	0.775967	778821	779612	792	b0742	ybgF	16128717	NP_415270.1		Secreted		0
24	57	51.8879	70.4307	1.35736	782389	783108	720	b0751	pnuC	16128719	NP_415272.1	multipass		MPR	0
29	69	47.922	65.1655	1.35982	783105	784046	942	b0752	zitB	16128720	NP_415273.1	multipass		MPR	1
217	222	320.789	187.562	0.584689	784856	785908	1053	b0754	aroG	16128722	NP_415275.1		Cytoplasmic	CPR	1
641	766	1325.11	905.01	0.682971	786066	786818	753	b0755	gpmA	16128723	NP_415276.1		Cytoplasmic	CPR	1
1695	2458	2534.58	2100.63	0.828789	787020	788060	1041	b0756	galM	16128724	NP_415277.1		Secreted		0
2871	4222	3889.56	3269.02	0.840459	788054	789202	1149	b0757	galK	16128725	NP_415278.1		Cytoplasmic	CPR	0
2514	2177	3737.72	1849.83	0.494908	789206	790252	1047	b0758	galT	16128726	NP_415279.1				0
3451	2070	5282.16	1810.79	0.342813	790262	791278	1017	b0759	galE	49176045	NP_415280.3		Cytoplasmic	CPR	0
64	139	67.634	83.9521	1.24127	791539	793011	1473	b0760	modF	16128728	NP_415281.1				0
55	116	108.511	130.798	1.20539	793079	793867	789	b0761	modE	16128729	NP_415282.1		Cytoplasmic	CPR	0
14	76	145.286	450.756	3.10254	793996	794145	150	b0762	acrZ	16128730	NP_415283.1				1
36	78	72.4018	89.6547	1.23829	794312	795085	774	b0763	modA	16128731	NP_415284.1		Secreted		0
15	116	33.84	149.564	4.41976	795085	795774	690	b0764	modB	16128732	NP_415285.1	multipass		MPR	0
28	100	41.1576	84.0085	2.04114	795777	796835	1059	b0765	modC	16128733	NP_415286.1				0
32	31	60.821	33.6742	0.55366	796836	797654	819	b0766	ybhA	16128734	NP_415287.1		Cytoplasmic	CPR	1
160	213	250.062	190.257	0.760836	797809	798804	996	b0767	pgl	16128735	NP_415288.1		Secreted		1
44	55	53.3427	38.1081	0.7144	805221	806504	1284	b0772	ybhC	16128740	NP_415293.1		Secreted		1
31	30	101.165	55.9529	0.553084	806656	807132	477	b0773	ybhB	16128741	NP_415294.1		Cytoplasmic	CPR	1
10	28	12.067	19.3102	1.60026	807191	808480	1290	b0774	bioA	16128742	NP_415295.1		Cytoplasmic	CPR	1
248	375	190.923	164.995	0.864194	812749	814770	2022	b0779	uvrB	16128747	NP_415300.1		Cytoplasmic	CPR	1
33	106	56.5116	103.744	1.83579	814962	815870	909	b0780	ybhK	16128748	NP_415301.1		Cytoplasmic	CPR	1
181	422	284.598	379.225	1.33249	816267	817256	990	b0781	moaA	16128749	NP_415302.1		Cytoplasmic	CPR	0
250	370	758.596	641.658	0.84585	817278	817790	513	b0782	moaB	16128750	NP_415303.1		Cytoplasmic	CPR	0
158	285	506.068	521.709	1.03091	817793	818278	486	b0783	moaC	16128751	NP_415304.1		Cytoplasmic	CPR	0
71	182	449.274	658.197	1.46502	818271	818516	246	b0784	moaD	16128752	NP_415305.1				0
145	308	498.262	604.884	1.21399	818518	818970	453	b0785	moaE	16128753	NP_415306.1		Cytoplasmic	CPR	0
127	482	280.416	608.243	2.16908	819107	819811	705	b0786	ybhL	16128754	NP_415307.1	multipass		MPR	1
117	778	443.131	1684.06	3.80037	823853	824263	411	b0791	ybhQ	16128759	NP_415312.1	multipass		MPR	1
58	121	81.5583	97.2427	1.19231	824225	825331	1107	b0792	ybhR	16128760	NP_415313.1	multipass		MPR	0
61	146	83.7345	114.541	1.3679	825342	826475	1134	b0793	ybhS	16128761	NP_415314.1	multipass		MPR	0
178	286	159.517	146.482	0.918285	826468	828204	1737	b0794	ybhF	90111168	NP_415315.4				0
150	179	233.729	159.407	0.682014	828197	829195	999	b0795	ybhG	16128763	NP_415316.1				0
35	50	81.0749	66.1942	0.816458	829195	829866	672	b0796	ybiH	162135896	NP_415317.4		Cytoplasmic	CPR	0
89	138	101.495	89.9427	0.886178	830095	831459	1365	b0797	rhlE	16128765	NP_415318.1		Cytoplasmic	CPR	1
31	76	99.9085	139.986	1.40115	831691	832173	483	b0798	ybiA	16128766	NP_415319.1		Cytoplasmic	CPR	1
196	316	141.842	130.697	0.921431	832293	834443	2151	b0799	dinG	16128767	NP_415320.1		Cytoplasmic	CPR	1
126	171	203.672	157.975	0.775635	834471	835433	963	b0800	ybiB	16128768	NP_415321.1		Cytoplasmic	CPR	1
81	122	116.103	99.9423	0.860808	835574	836659	1086	b0801	ybiC	16128769	NP_415322.1		Cytoplasmic	CPR	1
7	28	41.7489	95.4414	2.28608	836888	837148	261	b0802	ybiJ	16128770	NP_415323.1				1
23	27	38.6221	25.9121	0.670915	841555	842481	927	b0807	rlmF	162135897	NP_415328.4		Cytoplasmic	CPR	1
22	70	15.3846	27.9764	1.81847	842478	844703	2226	b0808	ybiO	90111173	NP_415329.4	multipass		MPR	1
150	346	322.954	425.752	1.31831	844964	845686	723	b0809	glnQ	16128777	NP_415330.1				0
127	259	299.535	349.12	1.16554	845683	846342	660	b0810	glnP	16128778	NP_415331.1	multipass		MPR	0
589	1055	1227.39	1256.47	1.02369	846481	847227	747	b0811	glnH	16128779	NP_415332.1		Secreted		0
388	429	1198.36	757.262	0.631913	847631	848134	504	b0812	dps	16128780	NP_415333.1		Cytoplasmic	CPR	1
529	488	1595.86	841.375	0.527225	849673	850188	516	b0814	ompX	16128782	NP_415335.1		Secreted		1
84	211	484.287	695.245	1.4356	851894	852163	270	b0816	N/A	16128784	NP_415337.1				1
39	120	129.72	228.115	1.75852	852406	852873	468	b0817	mntR	16128785	NP_415338.1		Cytoplasmic	CPR	0
61	160	84.857	127.206	1.49907	852870	853988	1119	b0818	ybiR	16128786	NP_415339.1	multipass		MPR	0
48	65	81.1277	62.7875	0.773934	854047	854967	921	b0819	ybiS	16128787	NP_415340.1				1
54	170	52.7674	94.9407	1.79923	855186	856778	1593	b0820	ybiT	16128788	NP_415341.1		Cytoplasmic	CPR	1
46	95	29.4309	34.7377	1.18031	859397	861829	2433	b0823	ybiW	16128791	NP_415344.1		Cytoplasmic	CPR	0
54	98	126.785	131.502	1.0372	862865	863527	663	b0825	fsaA	90111174	NP_415346.4		Cytoplasmic	CPR	1
83	132	172.268	156.578	0.908924	863603	864352	750	b0826	moeB	16128794	NP_415347.1		Cytoplasmic	CPR	0
136	185	171.281	133.16	0.777436	864352	865587	1236	b0827	moeA	16128795	NP_415348.1		Cytoplasmic	CPR	0
103	304	165.977	279.973	1.68682	865791	866756	966	b0828	iaaA	16128796	NP_415349.1				0
141	315	117.247	149.701	1.2768	866743	868614	1872	b0829	gsiA	145698235	NP_415350.2				0
109	171	110.249	98.85	0.896605	868634	870172	1539	b0830	gsiB	16128798	NP_415351.1		Secreted		0
53	196	89.5785	189.328	2.11355	870190	871110	921	b0831	gsiC	16128799	NP_415352.1	multipass		MPR	0
25	201	42.671	196.074	4.59502	871113	872024	912	b0832	gsiD	16128800	NP_415353.1	multipass		MPR	0
444	730	1799.86	1691.26	0.939662	877471	877854	384	b0836	bssR	16128804	NP_415357.1				1
57	125	79.5057	99.6472	1.25333	877965	879080	1116	b0837	yliI	16128805	NP_415358.1				1
45	124	111.72	175.944	1.57486	879077	879703	627	b0838	gstB	90111175	NP_415359.4		Cytoplasmic	CPR	1
102	292	131.984	215.942	1.63612	879950	881152	1203	b0839	dacC	16128807	NP_415360.1				1
24	122	49.2218	143	2.90523	881199	881957	759	b0840	deoR	16128808	NP_415361.1		Cytoplasmic	CPR	1
26	94	32.8245	67.8241	2.06627	882896	884128	1233	b0842	mdfA	16128810	NP_415363.1	multipass		MPR	1
70	403	64.6291	212.651	3.29032	887357	889042	1686	b0847	ybjL	16128815	NP_415368.1	multipass		MPR	1
24	213	98.8342	501.311	5.07224	889312	889689	378	b0848	ybjM	16128816	NP_415369.1	multipass		MPR	1
32	61	172.96	188.433	1.08946	890136	890423	288	b0850	ybjC	16128818	NP_415371.1				0
67	120	144.253	147.66	1.02362	890407	891129	723	b0851	nfsA	16128819	NP_415372.1		Cytoplasmic	CPR	0
43	146	74.1256	143.842	1.94051	891190	892092	903	b0852	rimK	16128820	NP_415373.1		Cytoplasmic	CPR	1
68	274	221.911	511.036	2.30289	892180	892656	477	b0853	ybjN	16128821	NP_415374.1				1
7	32	12.88	33.6511	2.61266	896307	897152	846	b0857	potI	16128825	NP_415378.1	multipass		MPR	0
66	204	153.57	271.284	1.76652	900089	900757	669	b0861	artM	16128829	NP_415382.1	multipass		MPR	0
63	204	136.776	253.122	1.85064	900757	901473	717	b0862	artQ	16128830	NP_415383.1	multipass		MPR	0
145	172	308.35	209.044	0.677941	901480	902211	732	b0863	artI	16128831	NP_415384.1		Secreted		0
54	80	115.307	97.6297	0.846697	902229	902957	729	b0864	artP	16128832	NP_415385.1				0
67	45	202.122	77.5858	0.383857	903175	903690	516	b0865	ybjP	16128833	NP_415386.1				1
64	91	307.484	249.871	0.81263	903816	904139	324	b0866	ybjQ	16128834	NP_415387.1				0
111	156	207.926	167.01	0.803218	904136	904966	831	b0867	amiD	16128835	NP_415388.1				0
54	135	82.8979	118.445	1.4288	904963	905976	1014	b0868	ybjS	90111178	NP_415389.2		Cytoplasmic	CPR	1
46	120	50.0387	74.6038	1.49092	906075	907505	1431	b0869	ybjT	90111179	NP_415390.4				0
40	71	62.1412	63.0391	1.01445	907516	908517	1002	b0870	ltaE	16128838	NP_415391.1		Cytoplasmic	CPR	0
99	106	89.6493	54.8592	0.611931	908554	910272	1719	b0871	poxB	16128839	NP_415392.1				0
262	472	420.887	433.349	1.02961	910405	911373	969	b0872	hcr	16128840	NP_415393.1		Cytoplasmic	CPR	0
680	516	640.359	277.713	0.433683	911385	913037	1653	b0873	hcp	90111180	NP_415394.4		Cytoplasmic	CPR	0
21	137	46.9675	175.118	3.72849	914575	915270	696	b0875	aqpZ	16128843	NP_415396.1	multipass		MPR	1
118	274	110.719	146.934	1.32709	915696	917354	1659	b0876	ybjD	16128844	NP_415397.1		Cytoplasmic	CPR	1
66	148	103.462	132.596	1.28159	917351	918343	993	b0877	ybjX	16128845	NP_415398.1				1
60	64	83.6902	51.0194	0.609622	918458	919573	1116	b0878	macA	90111182	NP_415399.4				0
70	223	55.9654	101.896	1.8207	919570	921516	1947	b0879	macB	16128847	NP_415400.1	multipass		MPR	0
245	2071	1695.01	8188.74	4.8311	921589	921813	225	b0880	cspD	16128848	NP_415401.1		Cytoplasmic	csp	1
103	173	499.482	479.469	0.959932	922136	922456	321	b0881	clpS	16128849	NP_415402.1		Cytoplasmic	CPR	1
2941	5195	2010.57	2029.75	1.00954	922487	924763	2277	b0882	clpA	16128850	NP_415403.1		Cytoplasmic	CPR	1
137	213	973.787	865.276	0.888568	925448	925666	219	b0884	infA	16128851	NP_415404.1		Cytoplasmic	CPR	1
36	143	79.4879	180.454	2.27021	925951	926655	705	b0885	aat	16128852	NP_415405.1		Cytoplasmic	CPR	1
85	221	76.8375	114.177	1.48595	926697	928418	1722	b0886	cydC	16128853	NP_415406.1	multipass		MPR	0
92	226	81.0474	113.787	1.40395	928419	930185	1767	b0887	cydD	16128854	NP_415407.1	multipass		MPR	0
55	108	88.6285	99.464	1.12226	930308	931273	966	b0888	trxB	16128855	NP_415408.1		Cytoplasmic	CPR	1
125	376	393.09	675.775	1.71913	931818	932312	495	b0889	lrp	16128856	NP_415409.1		Cytoplasmic	CPR	1
404	988	157.615	220.294	1.39768	932447	936436	3990	b0890	ftsK	16128857	NP_415410.1	multipass		MPR	1
107	145	272.157	210.783	0.77449	936595	937206	612	b0891	lolA	145698236	NP_415411.2		Secreted		1
70	116	81.0749	76.7853	0.947091	937217	938560	1344	b0892	rarA	16128859	NP_415412.1		Cytoplasmic	CPR	1
1205	1837	1450.7	1263.95	0.871272	938651	939943	1293	b0893	serS	16128860	NP_415413.1		Cytoplasmic	CPR	1
1505	2029	958.176	738.283	0.770508	940182	942626	2445	b0894	dmsA	90111183	NP_415414.4				0
358	585	901.742	842.145	0.933909	942637	943254	618	b0895	dmsB	16128862	NP_415415.1				0
540	1904	972.899	1960.53	2.01514	943256	944119	864	b0896	dmsC	16128863	NP_415416.1	multipass		MPR	0
116	235	287.99	333.442	1.15782	944154	944780	627	b0897	ycaC	16128864	NP_415417.1				1
63	259	85.3509	200.539	2.34958	945094	946242	1149	b0898	ycaD	16128865	NP_415418.1	multipass		MPR	1
133	276	279.397	331.368	1.18601	949563	950303	741	b0902	pflA	16128869	NP_415422.1		Cytoplasmic	CPR	1
4287	2840	2923.04	1106.7	0.378614	950495	952777	2283	b0903	pflB	16128870	NP_415423.1		Cytoplasmic	CPR	1
412	1654	747.477	1715.01	2.2944	952832	953689	858	b0904	focA	16128871	NP_415424.1	multipass		MPR	1
30	56	26.5185	28.291	1.06684	954095	955855	1761	b0905	ycaO	90111185	NP_415425.4		Cytoplasmic	CPR	1
17	64	38.1859	82.1611	2.15161	955985	956677	693	b0906	ycaP	16128873	NP_415426.1	multipass	Cytoplasmic	CPR	1
97	366	138.654	299.001	2.15646	956876	957964	1089	b0907	serC	16128874	NP_415427.1		Cytoplasmic	CPR	0
107	115	243.509	149.576	0.614251	960424	961107	684	b0910	cmk	16128877	NP_415430.1		Cytoplasmic	CPR	0
1503	1651	1397.63	877.427	0.627798	961218	962891	1674	b0911	rpsA	16128878	NP_415431.1		Cytoplasmic	CPR	0
103	79	562.575	246.605	0.438351	963051	963335	285	b0912	ihfB	16128879	NP_415432.1		Cytoplasmic	CPR	0
33	105	22.6795	41.2421	1.81847	963543	965807	2265	b0913	ycaI	90111187	NP_415433.4	multipass		MPR	0
81	166	72.0913	84.4379	1.17126	965844	967592	1749	b0914	msbA	16128881	NP_415434.1	multipass		MPR	0
42	83	66.2399	74.8136	1.12943	967589	968575	987	b0915	lpxK	16128882	NP_415435.1				0
16	41	20.1997	29.5829	1.46452	968612	969844	1233	b0916	ycaQ	16128883	NP_415436.1		Cytoplasmic	CPR	0
18	27	153.112	131.26	0.85728	969896	970078	183	b0917	ycaR	16128884	NP_415437.1				0
136	233	283.404	277.495	0.979149	970075	970821	747	b0918	kdsB	16128885	NP_415438.1		Cytoplasmic	CPR	0
1005	1583	1749.91	1575.3	0.900216	970975	971868	894	b0919	ycbJ	16128886	NP_415439.1		Cytoplasmic	CPR	1
144	233	287.379	265.755	0.924752	971845	972624	780	b0920	ycbC	16128887	NP_415440.1				1
89	248	176.261	280.704	1.59255	972760	973545	786	b0921	smtA	16128888	NP_415441.1		Cytoplasmic	CPR	0
129	265	151.781	178.199	1.17405	973542	974864	1323	b0922	mukF	16128889	NP_415442.1		Cytoplasmic	CPR	0
60	89	132.48	112.31	0.847755	974845	975549	705	b0923	mukE	226524705	NP_415443.2		Cytoplasmic	CPR	0
450	685	157.025	136.609	0.869981	975549	980009	4461	b0924	mukB	16128891	NP_415444.1		Cytoplasmic	CPR	0
227	478	191.21	230.115	1.20347	980270	982117	1848	b0925	ycbB	16128892	NP_415445.1		Secreted		1
73	131	206.985	212.285	1.0256	982298	982846	549	b0926	ycbK	16128893	NP_415446.1				0
119	363	285.864	498.369	1.74338	982873	983520	648	b0927	ycbL	16128894	NP_415447.1		Cytoplasmic	CPR	0
313	329	409.091	245.756	0.600735	983742	984932	1191	b0928	aspC	16128895	NP_415448.1		Cytoplasmic	CPR	1
3629	4589	5187.36	3748.95	0.722708	985117	986205	1089	b0929	ompF	16128896	NP_415449.1		Secreted		1
269	617	298.883	391.802	1.31088	986808	988208	1401	b0930	asnS	16128897	NP_415450.1		Cytoplasmic	CPR	1
118	349	152.688	258.095	1.69034	988377	989579	1203	b0931	pncB	16128898	NP_415451.1		Cytoplasmic	CPR	1
654	902	389.606	307.105	0.788244	989845	992457	2613	b0932	pepN	16128899	NP_415452.1				1
27	26	54.7256	30.1184	0.550353	992500	993267	768	b0933	ssuB	16128900	NP_415453.1				0
24	67	36.9528	58.958	1.59549	1003991	1005001	1011	b0945	pyrD	16128912	NP_415465.1				1
51	288	146.204	471.859	3.22741	1005175	1005717	543	b0946	zapC	90111193	NP_415466.4				1
40	75	56.0951	60.1115	1.0716	1005714	1006823	1110	b0947	ycbX	16128914	NP_415467.1				1
82	142	60.5236	59.9006	0.989706	1007067	1009175	2109	b0948	rlmL	16128915	NP_415468.1		Cytoplasmic	CPR	0
64	112	52.2143	52.2227	1.00016	1009187	1011094	1908	b0949	uup	16128916	NP_415469.1		Cytoplasmic	CPR	0
38	98	47.1709	69.5261	1.47392	1011224	1012477	1254	b0950	pqiA	16128917	NP_415470.1	multipass		MPR	0
42	89	39.8408	48.2504	1.21108	1012482	1014122	1641	b0951	pqiB	16128918	NP_415471.1				0
30	90	82.7999	141.965	1.71456	1014119	1014682	564	b0952	ymbA	145698237	NP_415472.2				1
134	201	1241.6	1064.4	0.85728	1014938	1015105	168	b0953	rmf	16128920	NP_415473.1				1
131	263	392.909	450.825	1.1474	1015175	1015693	519	b0954	fabA	16128921	NP_415474.1		Cytoplasmic	CPR	1
114	181	100.77	91.4405	0.907414	1015762	1017522	1761	b0955	ycbZ	16128922	NP_415475.1		Cytoplasmic	CPR	1
47	109	161.506	214.066	1.32544	1017708	1018160	453	b0956	matP	16128923	NP_415476.1		Cytoplasmic	CPR	1
9477	6264	14171.2	5353.29	0.377757	1018236	1019276	1041	b0957	ompA	16128924	NP_415477.1		Secreted		1
42	94	128.194	163.975	1.27912	1019633	1020142	510	b0958	sulA	16128925	NP_415478.1				1
32	122	79.0673	172.282	2.17892	1020361	1020990	630	b0959	sxy	16128926	NP_415479.1				1
48	129	34.6883	53.2799	1.53596	1020953	1023106	2154	b0960	yccS	90111194	NP_415480.2	multipass		MPR	0
15	49	52.2362	97.5232	1.86697	1023125	1023571	447	b0961	yccF	16128928	NP_415481.1	multipass		MPR	0
171	327	129.53	141.565	1.09291	1023694	1025748	2055	b0962	helD	16128929	NP_415482.1		Cytoplasmic	CPR	1
253	385	858.016	746.221	0.869705	1025780	1026238	459	b0963	mgsA	90111195	NP_415483.2		Cytoplasmic	CPR	1
85	59	319.6	126.786	0.396702	1027169	1027582	414	b0965	yccU	90111196	NP_415485.4				1
90	123	440.558	344.11	0.781078	1027627	1027944	318	b0966	hspQ	145698238	NP_415486.4				1
33	52	43.131	38.8428	0.900577	1028002	1029192	1191	b0967	rlmI	145698239	NP_415487.4		Cytoplasmic	CPR	1
18	55	100.428	175.379	1.74631	1029287	1029565	279	b0968	yccX	16128935	NP_415488.1		Cytoplasmic	CPR	1
21	37	99.0588	99.7487	1.00696	1029562	1029891	330	b0969	tusE	90111197	NP_415489.4		Cytoplasmic	CPR	1
215	545	507.087	734.636	1.44874	1029982	1030641	660	b0970	yccA	16128937	NP_415490.1	multipass		MPR	1
67	60	93.2035	47.7024	0.511809	1031362	1032480	1119	b0972	hyaA	16128938	NP_415491.1				0
48	55	41.6492	27.2747	0.654867	1032477	1034270	1794	b0973	hyaB	16128939	NP_415492.1				0
23	51	50.5688	64.085	1.26728	1034289	1034996	708	b0974	hyaC	16128940	NP_415493.1	multipass		MPR	0
16	41	42.3575	62.0334	1.46452	1034993	1035580	588	b0975	hyaD	16128941	NP_415494.1		Cytoplasmic	CPR	0
12	19	46.8162	42.3643	0.904907	1035577	1035975	399	b0976	hyaE	16128942	NP_415495.1				0
16	22	29.0282	22.8115	0.78584	1035972	1036829	858	b0977	hyaF	16128943	NP_415496.1		Cytoplasmic	CPR	0
18	37	18.1356	21.3055	1.17479	1036963	1038507	1545	b0978	appC	16128944	NP_415497.1	multipass		MPR	0
14	55	19.1671	43.035	2.24526	1038519	1039655	1137	b0979	appB	16128945	NP_415498.1	multipass		MPR	0
7	19	8.38835	13.0126	1.55127	1039840	1041138	1299	b0980	appA	16128946	NP_415500.1		Secreted		1
20	57	14.2745	23.2508	1.62883	1041253	1043433	2181	b0981	etk	16128947	NP_415501.1	multipass		MPR	0
609	203	4450.67	847.883	0.190507	1050684	1050896	213	b0990	cspG	16128956	NP_415510.1		Cytoplasmic	csp	1
14	42	94.3417	161.755	1.71456	1051070	1051300	231	b0991	ymcE	16128957	NP_415511.1				0
120	359	173.926	297.378	1.7098	1051512	1052585	1074	b0992	yccM	16128958	NP_415512.1	multipass		MPR	1
36	80	20.4149	25.9279	1.27005	1052657	1055401	2745	b0993	torS	90111200	NP_415513.2	multipass		MPR	1
31	114	46.8958	98.5619	2.10172	1055484	1056512	1029	b0994	torT	16128960	NP_415514.1		Secreted		1
22	53	13.4456	18.5126	1.37684	1058479	1061025	2547	b0997	torA	16128963	NP_415517.1		Secreted		0
10	33	25.944	48.9308	1.88602	1061022	1061621	600	b0998	torD	16128964	NP_415518.1		Cytoplasmic	CPR	0
45	127	228.917	369.234	1.61296	1061773	1062078	306	b0999	cbpM	16128965	NP_415519.1				0
239	252	403.948	243.422	0.602607	1062078	1062998	921	b1000	cbpA	16128966	NP_415520.1		Cytoplasmic	CPR	0
527	525	660.506	376.06	0.569351	1064808	1066049	1242	b1002	agp	16128968	NP_415522.1		Secreted		1
438	686	2990.38	2676.76	0.895121	1066087	1066314	228	b1003	yccJ	16128969	NP_415523.1				0
1198	2096	3123.71	3123.46	0.999922	1066335	1066931	597	b1004	wrbA	16128970	NP_415524.1				0
12	89	14.0554	59.5778	4.23878	1067734	1069062	1329	b1006	rutG	90111201	NP_415526.4	multipass		MPR	0
51	88	20.0324	19.755	0.986153	1074143	1078105	3963	b1014	putA	16128980	NP_415534.1		Cytoplasmic	CPR	1
30	133	30.9471	78.4119	2.53374	1078528	1080036	1509	b1015	putP	16128981	NP_415535.1	multipass		MPR	1
18	37	11.5592	13.5796	1.17479	1089089	1091512	2424	b1024	pgaA	16128988	NP_415543.1				0
83	117	137.594	110.851	0.805637	1097109	1098047	939	b1033	ghrA	90111205	NP_415551.2		Cytoplasmic	CPR	1
66	130	139.212	156.713	1.12572	1098102	1098839	738	b1034	ycdX	16128997	NP_415552.1		Cytoplasmic	CPR	0
62	205	173.895	328.61	1.8897	1098863	1099417	555	b1035	ycdY	16128998	NP_415553.1				0
66	202	208.817	365.263	1.7492	1099519	1100010	492	b1036	ycdZ	90111206	NP_415554.4	multipass		MPR	1
9	56	16.7983	59.7367	3.55613	1100074	1100907	834	b1037	csgG	16129000	NP_415555.1				0
24	52	69.9613	86.6326	1.23829	1105043	1105576	534	b1045	ymdB	16129008	NP_415563.1		Cytoplasmic	CPR	0
79	166	86.4799	103.855	1.20092	1105578	1106999	1422	b1046	clsC	90111207	NP_415564.2				0
9	42	12.0982	32.2671	2.66709	1107007	1108164	1158	b1047	mdoC	16129010	NP_415565.1	multipass		MPR	1
261	310	264.507	179.552	0.678817	1108558	1110093	1536	b1048	mdoG	16129011	NP_415566.1		Secreted		0
257	629	157.255	219.965	1.39878	1110086	1112629	2544	b1049	mdoH	16129012	NP_415567.1	multipass		MPR	0
74	82	505.225	319.962	0.633306	1112802	1113029	228	b1050	yceK	16129013	NP_415568.1				1
124	82	514.728	194.537	0.377941	1113030	1113404	375	b1051	msyB	90111208	NP_415569.4		Cytoplasmic	CPR	1
50	96	63.4327	69.6059	1.09732	1113487	1114713	1227	b1053	mdtG	16129016	NP_415571.1	multipass		MPR	1
56	128	94.649	123.643	1.30633	1114885	1115805	921	b1054	lpxL	16129017	NP_415572.1				1
21	76	31.0441	64.2103	2.06836	1116030	1117082	1053	b1055	yceA	16129018	NP_415573.1		Cytoplasmic	CPR	1
42	33	58.4261	26.2363	0.449052	1118691	1119809	1119	b1059	solA	16129022	NP_415577.1		Cytoplasmic	CPR	0
361	3202	2203.71	11171.2	5.06927	1119924	1120178	255	b1060	bssS	49176074	NP_415578.3				1
28	44	41.6293	37.3874	0.898103	1120784	1121830	1047	b1062	pyrC	16129025	NP_415580.1		Cytoplasmic	CPR	1
28	40	77.6932	63.4332	0.816458	1121936	1122496	561	b1063	yceB	16129026	NP_415581.1				1
53	63	127.318	86.4938	0.679354	1122630	1123277	648	b1064	grxB	16129027	NP_415582.1		Cytoplasmic	CPR	1
93	399	119.741	293.607	2.45201	1123341	1124549	1209	b1065	mdtH	90111209	NP_415583.4	multipass		MPR	1
101	137	268.753	208.345	0.775231	1124785	1125369	585	b1066	rimJ	16129029	NP_415584.1		Cytoplasmic	CPR	1
88	128	211.395	175.733	0.831302	1125380	1126027	648	b1067	yceH	16129030	NP_415585.1				1
165	291	277.971	280.182	1.00795	1126029	1126952	924	b1068	yceM	16129031	NP_415586.1				1
46	160	46.6181	92.6719	1.9879	1127062	1128597	1536	b1069	murJ	16129032	NP_415587.1	multipass		MPR	1
16	10	84.715	30.2602	0.3572	1129058	1129351	294	b1071	flgM	16129034	NP_415589.1		Cytoplasmic	CPR	0
9	26	21.2269	35.0468	1.65106	1129427	1130086	660	b1072	flgA	16129035	NP_415590.1		Secreted		0
17	29	63.4601	61.8702	0.974946	1130241	1130657	417	b1073	flgB	16129036	NP_415591.1		Secreted		0
21	32	80.7146	70.2934	0.870888	1130661	1131065	405	b1074	flgC	16129037	NP_415592.1		Secreted		0
33	57	73.8061	72.8593	0.987171	1131077	1131772	696	b1075	flgD	16129038	NP_415593.1		Secreted		0
68	58	87.5529	42.6797	0.487473	1131797	1133005	1209	b1076	flgE	16129039	NP_415594.1		Secreted		0
39	43	80.3028	50.6018	0.630138	1133025	1133780	756	b1077	flgF	16129040	NP_415595.1		Secreted		0
38	37	75.5457	42.0397	0.55648	1133952	1134734	783	b1078	flgG	16129041	NP_415596.1		Secreted		0
22	24	48.9929	30.5459	0.623477	1134787	1135485	699	b1079	flgH	16129042	NP_415597.1		Secreted		0
20	22	28.3541	17.8254	0.628672	1135497	1136594	1098	b1080	flgI	49176076	NP_415598.3		Secreted		0
12	18	19.8298	16.9997	0.85728	1136594	1137535	942	b1081	flgJ	16129044	NP_415599.1		Secreted		0
14	21	13.256	11.3641	0.85728	1137601	1139244	1644	b1082	flgK	16129045	NP_415600.1		Secreted		0
13	39	21.2121	36.3694	1.71456	1139256	1140209	954	b1083	flgL	16129046	NP_415601.1		Secreted		0
816	1062	398.687	296.55	0.743817	1140405	1143590	3186	b1084	rne	16129047	NP_415602.1		Cytoplasmic	CPR	1
60	31	290.96	85.9164	0.295286	1143725	1144045	321	b1085	yceQ	90111210	NP_415603.2				1
46	85	74.5889	78.7711	1.05607	1144163	1145122	960	b1086	rluC	16129049	NP_415604.1		Cytoplasmic	CPR	1
32	100	85.1494	152.077	1.786	1145234	1145818	585	b1087	yceF	90111211	NP_415605.2		Cytoplasmic	CPR	1
465	543	1386.66	925.441	0.667388	1146017	1146538	522	b1088	yceD	16129051	NP_415606.1		Cytoplasmic	CPR	0
281	105	2513.88	536.858	0.213557	1146590	1146763	174	b1089	rpmF	16129052	NP_415607.1		Cytoplasmic	CPR	0
171	513	248.539	426.135	1.71456	1146844	1147914	1071	b1090	plsX	90111212	NP_415608.2		Cytoplasmic	CPR	0
253	452	412.819	421.512	1.02106	1147982	1148935	954	b1091	fabH	16129054	NP_415609.1		Cytoplasmic	CPR	0
397	563	664.5	538.573	0.810494	1148951	1149880	930	b1092	fabD	16129055	NP_415610.1		Cytoplasmic	CPR	0
820	2472	1736.66	2992.13	1.72292	1149893	1150627	735	b1093	fabG	16129056	NP_415611.1		Cytoplasmic	CPR	0
969	1893	6364.48	7105.94	1.1165	1150838	1151074	237	b1094	acpP	16129057	NP_415612.1		Cytoplasmic	CPR	0
716	1401	897.386	1003.54	1.1183	1151162	1152403	1242	b1095	fabF	16129058	NP_415613.1		Cytoplasmic	CPR	0
32	68	61.4968	74.6867	1.21448	1152523	1153332	810	b1096	pabC	16129059	NP_415614.1		Cytoplasmic	CPR	0
34	71	51.7358	61.745	1.19347	1153335	1154357	1023	b1097	yceG	16129060	NP_415615.1				0
42	134	101.836	185.69	1.82342	1154347	1154988	642	b1098	tmk	16129061	NP_415616.1		Cytoplasmic	CPR	0
46	70	71.2491	61.9657	0.869705	1154985	1155989	1005	b1099	holB	16129062	NP_415617.1		Cytoplasmic	CPR	0
57	173	111.188	192.869	1.73461	1156000	1156797	798	b1100	ycfH	16129063	NP_415618.1		Cytoplasmic	CPR	0
241	630	261.611	390.851	1.49402	1157092	1158525	1434	b1101	ptsG	16129064	NP_415619.1	multipass		MPR	1
67	50	289.708	123.563	0.426508	1161108	1161467	360	b1103	hinT	49176077	NP_415621.3		Cytoplasmic	CPR	0
99	172	407.691	404.814	0.992944	1161470	1161847	378	b1104	ycfL	16129067	NP_415622.1				0
74	123	179.426	170.447	0.949959	1161861	1162502	642	b1105	lpoB	16129068	NP_415623.1				0
52	75	98.1154	80.8773	0.824308	1162483	1163307	825	b1106	thiK	16129069	NP_415624.1				0
143	248	216.958	215.042	0.991168	1163318	1164343	1026	b1107	nagZ	16129070	NP_415625.1		Cytoplasmic	CPR	0
329	601	943.157	984.678	1.04402	1164366	1164908	543	b1108	ycfP	90111213	NP_415626.4		Cytoplasmic	CPR	0
147	162	175.345	110.439	0.629839	1165308	1166612	1305	b1109	ndh	16129072	NP_415627.1				1
12	48	34.592	79.08	2.28608	1166822	1167361	540	b1110	ycfJ	16129073	NP_415628.1		Secreted		1
29	4	174.971	13.793	0.0788304	1168296	1168553	258	b1112	bhsA	16129075	NP_415630.1				1
119	168	53.7395	43.3598	0.806852	1169741	1173187	3447	b1114	mfd	16129077	NP_415632.1		Cytoplasmic	CPR	1
47	53	60.9683	39.2929	0.64448	1174650	1175849	1200	b1116	lolC	16129079	NP_415634.1	multipass		MPR	0
24	44	53.2184	55.7616	1.04779	1175842	1176543	702	b1117	lolD	90111215	NP_415635.4				0
86	242	107.527	172.928	1.60823	1176543	1177787	1245	b1118	lolE	16129081	NP_415636.1	multipass		MPR	0
101	221	172.391	215.584	1.25055	1177816	1178727	912	b1119	nagK	16129082	NP_415637.1		Cytoplasmic	CPR	0
72	174	133.426	184.285	1.38117	1178743	1179582	840	b1120	cobB	16129083	NP_415638.1				0
64	98	95.1527	83.272	0.875141	1181006	1182052	1047	b1123	potD	16129086	NP_415641.1		Secreted		0
17	58	31.96	62.3185	1.94989	1182840	1183667	828	b1125	potB	162135921	NP_415643.3	multipass		MPR	0
41	54	56.1321	42.2525	0.752734	1183681	1184817	1137	b1126	potA	16129089	NP_415644.1				0
307	428	389.477	310.326	0.796778	1185067	1186293	1227	b1127	pepT	16129090	NP_415645.1		Cytoplasmic	CPR	1
216	361	299.674	286.242	0.95518	1186342	1187463	1122	b1128	ycfD	90111217	NP_415646.4		Cytoplasmic	CPR	1
127	282	135.314	171.719	1.26905	1187539	1188999	1461	b1129	phoQ	16129092	NP_415647.1	multipass		MPR	0
111	192	257.123	254.186	0.988576	1188999	1189670	672	b1130	phoP	16129093	NP_415648.1		Cytoplasmic	CPR	0
36	50	40.8745	32.4453	0.793778	1189839	1191209	1371	b1131	purB	16129094	NP_415649.1		Cytoplasmic	CPR	0
32	29	77.5894	40.1867	0.51794	1191213	1191854	642	b1132	hflD	16129095	NP_415650.1				0
163	169	229.207	135.818	0.592558	1191890	1192996	1107	b1133	mnmA	90111218	NP_415651.4		Cytoplasmic	CPR	1
25	34	84.2337	65.4721	0.777268	1193050	1193511	462	b1134	nudJ	16129097	NP_415652.1		Cytoplasmic	CPR	0
935	1042	1163.43	741.02	0.636924	1194346	1195596	1251	b1136	icd	16129099	NP_415654.1		Cytoplasmic	CPR	1
17	48	39.2042	63.264	1.6137	1201482	1202156	675	b1145	ymfK	16129108	NP_415663.1		Cytoplasmic	CPR	1
98	174	10.0408	10.1888	1.01474	1195443	1210635	15193	N/A	N/A	N/A	N/A				1
78	184	165.871	223.628	1.3482	1212551	1213282	732	b1162	bluR	16129125	NP_415680.1		Cytoplasmic	CPR	1
22	38	28.2558	27.8933	0.987171	1213487	1214698	1212	b1163	bluF	16129126	NP_415681.1				1
59	87	343.976	289.886	0.84275	1223502	1223768	267	b1174	minE	16129137	NP_415692.1		Cytoplasmic	CPR	0
287	397	549.514	434.43	0.79057	1223772	1224584	813	b1175	minD	16129138	NP_415693.1				0
268	574	599.395	733.706	1.22408	1224608	1225303	696	b1176	minC	16129139	NP_415694.1		Cytoplasmic	CPR	0
29	72	122.337	173.59	1.41895	1225823	1226191	369	b1177	ycgJ	16129140	NP_415695.1				1
5	13	8.5342	12.6814	1.48595	1228706	1229617	912	b1182	hlyE	162135899	NP_415700.4		Secreted		1
40	211	117.261	353.515	3.01477	1231723	1232253	531	b1185	dsbB	49176085	NP_415703.3	multipass		MPR	1
47	115	47.4462	66.3488	1.3984	1232399	1233940	1542	b1186	nhaB	16129149	NP_415704.1	multipass		MPR	1
168	455	363.216	562.21	1.54787	1234161	1234880	720	b1187	fadR	16129150	NP_415705.1		Cytoplasmic	CPR	1
226	315	229.485	182.805	0.796588	1234932	1236464	1533	b1188	ycgB	16129151	NP_415706.1		Cytoplasmic	CPR	1
105	184	125.825	126.017	1.00152	1236794	1238092	1299	b1189	dadA	16129152	NP_415707.1				0
54	109	78.486	90.5433	1.15362	1238102	1239172	1071	b1190	dadX	16129153	NP_415708.1		Cytoplasmic	CPR	0
65	340	58.2507	174.14	2.98949	1239558	1241294	1737	b1191	cvrA	90111230	NP_415709.2	multipass		MPR	1
27	69	45.9336	67.0884	1.46055	1241389	1242303	915	b1192	ldcA	16129155	NP_415710.1		Cytoplasmic	CPR	1
17	72	43.24	104.665	2.42056	1242403	1243014	612	b1193	emtA	90111231	NP_415711.2				1
15	61	91.567	212.818	2.32418	1243951	1244205	255	b1195	ymgE	16129158	NP_415713.1	multipass		MPR	1
29	27	26.5857	14.1464	0.532105	1244902	1246599	1698	b1197	treA	16129160	NP_415715.1		Secreted		1
228	498	250.115	312.224	1.24832	1246919	1248337	1419	b1198	dhaM	226524708	NP_415716.4		Cytoplasmic	CPR	0
116	179	285.261	251.576	0.881915	1248348	1248980	633	b1199	dhaL	16129162	NP_415717.1				0
203	361	295.049	299.873	1.01635	1248991	1250061	1071	b1200	dhaK	162135900	NP_415718.6				0
23	97	18.6472	44.9459	2.41032	1250289	1252208	1920	b1201	dhaR	90111234	NP_415719.2		Cytoplasmic	CPR	1
38	93	20.6249	28.8485	1.39872	1252308	1255175	2868	b1202	ycgV	16129165	NP_415720.1		Secreted		1
89	119	126.869	96.9491	0.764168	1255944	1257035	1092	b1203	ychF	16129166	NP_415721.1				0
14	26	37.2529	39.54	1.06139	1257152	1257736	585	b1204	pth	16129167	NP_415722.1		Cytoplasmic	CPR	0
389	1155	2170.37	3682.96	1.69693	1258014	1258292	279	b1205	ychH	16129168	NP_415723.1				1
97	299	89.8773	158.337	1.7617	1258347	1260026	1680	b1206	dauA	90111235	NP_415724.2	multipass		MPR	1
169	142	277.502	133.26	0.480212	1260151	1261098	948	b1207	prs	16129170	NP_415725.1		Cytoplasmic	CPR	1
161	239	294.153	249.562	0.848406	1261249	1262100	852	b1208	ispE	16129171	NP_415726.1		Cytoplasmic	CPR	0
41	28	102.279	39.9202	0.390307	1262100	1262723	624	b1209	lolB	16129172	NP_415727.1		Secreted		0
182	300	225.384	212.327	0.942066	1262937	1264193	1257	b1210	hemA	16129173	NP_415728.1		Cytoplasmic	CPR	1
76	112	109.238	92.0045	0.84224	1264235	1265317	1083	b1211	prfA	16129174	NP_415729.1		Cytoplasmic	CPR	0
23	43	42.9289	45.8693	1.06849	1265317	1266150	834	b1212	prmC	16129175	NP_415730.1		Cytoplasmic	CPR	0
22	26	87.1401	58.8573	0.675433	1266147	1266539	393	b1213	ychQ	16129176	NP_415731.1				0
91	254	174.882	278.977	1.59523	1266543	1267352	810	b1214	ychA	16129177	NP_415732.1		Cytoplasmic	CPR	0
165	310	300.404	322.563	1.07377	1267388	1268242	855	b1215	kdsA	16129178	NP_415733.1		Cytoplasmic	CPR	1
12	51	16.9661	41.21	2.42896	1269972	1271072	1101	b1216	chaA	16129179	NP_415734.1	multipass		MPR	1
28	58	62.6234	74.1375	1.18386	1271730	1272425	696	b1218	chaC	145698247	NP_415736.2				1
206	218	905.84	547.864	0.604813	1272469	1272822	354	b1219	ychN	16129182	NP_415737.1				1
53	78	59.1411	49.7439	0.841105	1273007	1274401	1395	b1220	ychO	145698248	NP_415738.2		Secreted		1
169	158	404.104	215.921	0.534321	1274402	1275052	651	b1221	narL	16129184	NP_415739.1		Cytoplasmic	CPR	0
188	208	162.854	102.976	0.63232	1275045	1276841	1797	b1222	narX	16129185	NP_415740.1	multipass		MPR	0
2236	5882	2500.46	3759.28	1.50344	1277180	1278571	1392	b1223	narK	16129186	NP_415741.1	multipass		MPR	1
13619	11968	5662.35	2843.84	0.502236	1279087	1282830	3744	b1224	narG	16129187	NP_415742.1				0
4459	5165	4510.1	2985.73	0.66201	1282827	1284365	1539	b1225	narH	16129188	NP_415743.1				0
1206	1340	2640.37	1676.7	0.635023	1284362	1285072	711	b1226	narJ	16129189	NP_415744.1		Cytoplasmic	CPR	0
1347	2491	3092.61	3268.61	1.05691	1285072	1285749	678	b1227	narI	16129190	NP_415745.1	multipass		MPR	0
39	81	72.0153	85.4824	1.187	1287005	1287847	843	b1232	purU	16129193	NP_415748.1		Cytoplasmic	CPR	1
43	166	145.829	321.747	2.20633	1287897	1288355	459	b1233	ychJ	16129194	NP_415749.1				1
170	360	292.084	353.503	1.21028	1288468	1289373	906	b1234	rssA	226524709	NP_415750.2		Secreted		0
82	235	125.882	206.181	1.63789	1289465	1290478	1014	b1235	rssB	16129196	NP_415751.1				0
207	403	354.482	394.421	1.11267	1290680	1291588	909	b1236	galU	16129197	NP_415752.1		Cytoplasmic	CPR	1
835	768	3139.6	1650.37	0.525662	1291732	1292145	414	b1237	hns	16129198	NP_415753.1		Cytoplasmic	CPR	1
2017	2748	1173.3	913.587	0.77865	1294669	1297344	2676	b1241	adhE	16129202	NP_415757.1		Cytoplasmic	CPR	1
31	197	74.4688	270.465	3.63192	1297821	1298468	648	b1242	ychE	16129203	NP_415758.1	multipass		MPR	1
1624	1836	1549.01	1000.86	0.646128	1299206	1300837	1632	b1243	oppA	16129204	NP_415759.1		Secreted		0
294	1144	496.907	1105.06	2.22388	1300923	1301843	921	b1244	oppB	16129205	NP_415760.1	multipass		MPR	0
466	1282	798.013	1254.71	1.57229	1301858	1302766	909	b1245	oppC	16129206	NP_415761.1	multipass		MPR	0
484	1032	743.011	905.443	1.21861	1302778	1303791	1014	b1246	oppD	49176090	YP_025300.1				0
387	817	599.422	723.228	1.20654	1303788	1304792	1005	b1247	oppF	16129208	NP_415763.1				0
19	51	89.6246	137.491	1.53408	1304845	1305174	330	b1248	yciU	90111236	NP_415764.4		Cytoplasmic	CPR	0
94	252	100.153	153.451	1.53216	1305209	1306669	1461	b1249	clsA	16129210	NP_415765.1	multipass		MPR	0
20	147	178.924	751.601	4.20067	1306812	1306985	174	b4595	yciY	145698250	YP_001165316.1				1
20	142	24.8268	100.742	4.05779	1307040	1308293	1254	b1250	kch	16129211	NP_415766.1	multipass		MPR	1
7	60	27.3094	133.782	4.89875	1309872	1310270	399	b1253	yciA	16129214	NP_415769.1				1
37	153	106.659	252.068	2.36331	1310375	1310914	540	b1254	yciB	16129215	NP_415770.1	multipass		MPR	0
46	240	96.2438	286.984	2.98185	1310944	1311687	744	b1255	yciC	16129216	NP_415771.1	multipass		MPR	0
395	1049	962.241	1460.47	1.51778	1312044	1312682	639	b1256	ompW	16129217	NP_415772.1		Secreted		1
25	33	48.223	36.3798	0.754407	1314440	1315246	807	b1260	trpA	16129221	NP_415776.1		Cytoplasmic	CPR	0
24	36	31.2892	26.8236	0.85728	1315246	1316439	1194	b1261	trpB	16129222	NP_415777.1		Cytoplasmic	CPR	0
25	71	28.6357	46.4792	1.62312	1316451	1317809	1359	b1262	trpC	90111239	NP_415778.2		Cytoplasmic	CPR	0
73	68	128.837	68.5898	0.532375	1321244	1322125	882	b1266	yciV	16129227	NP_415782.1		Cytoplasmic	CPR	0
57	51	142.88	73.0631	0.51136	1322122	1322742	621	b1267	yciO	162135901	NP_415783.6		Cytoplasmic	CPR	0
38	104	31.1984	48.7994	1.56416	1322770	1324665	1896	b1268	yciQ	16129229	NP_415784.1				0
92	174	163.483	176.711	1.08092	1324876	1325751	876	b1269	rluB	16129230	NP_415785.1		Cytoplasmic	CPR	1
219	323	324.67	273.673	0.842927	1327356	1328405	1050	b1272	sohB	16129233	NP_415788.1				1
65	36	401.514	127.093	0.316534	1328441	1328692	252	b1273	yciN	16129234	NP_415789.1				1
160	357	95.8669	122.25	1.2752	1329072	1331669	2598	b1274	topA	16129235	NP_415790.1		Cytoplasmic	CPR	1
106	162	169.235	147.819	0.873456	1331879	1332853	975	b1275	cysB	16129236	NP_415791.1		Cytoplasmic	CPR	1
265	407	154.151	135.309	0.877769	1333855	1336530	2676	b1276	acnA	16129237	NP_415792.1		Cytoplasmic	CPR	1
63	154	165.936	231.821	1.39705	1336594	1337184	591	b1277	ribA	16129238	NP_415793.1		Cytoplasmic	CPR	1
42	140	85.4625	162.812	1.90507	1337354	1338118	765	b1278	pgpB	16129239	NP_415794.1	multipass		MPR	1
77	439	387.9	1263.94	3.25841	1338267	1338575	309	b1279	yciS	16129240	NP_415795.1	multipass		MPR	0
93	334	123.733	253.969	2.05256	1338582	1339751	1170	b1280	yciM	16129241	NP_415796.1		Cytoplasmic	CPR	0
26	93	54.8409	112.11	2.04428	1339945	1340682	738	b1281	pyrF	16129242	NP_415797.1		Cytoplasmic	CPR	0
11	22	52.364	59.8542	1.14304	1340682	1341008	327	b1282	yciH	90111241	NP_415798.2		Cytoplasmic	CPR	0
13	29	92.4032	117.808	1.27493	1341134	1341352	219	b1283	osmB	16129244	NP_415799.1				1
41	98	32.136	43.9002	1.36607	1342781	1344766	1986	b1285	gmr	16129246	NP_415801.1				1
79	100	63.5527	45.9768	0.723443	1345002	1346936	1935	b1286	rnb	16129247	NP_415802.1		Cytoplasmic	CPR	1
174	136	343.289	153.349	0.446706	1348275	1349063	789	b1288	fabI	16129249	NP_415804.1				1
13	22	57.1647	55.289	0.967188	1349431	1349784	354	b1289	ycjD	16129250	NP_415805.1				1
58	91	90.9215	81.5289	0.896696	1350660	1351652	993	b1291	sapD	16129252	NP_415807.1				0
13	40	22.7119	39.9394	1.75852	1351652	1352542	891	b1292	sapC	16129253	NP_415808.1	multipass		MPR	0
80	105	75.7488	56.8207	0.75012	1353491	1355134	1644	b1294	sapA	16129255	NP_415810.1		Secreted		0
6	36	16.738	57.3968	3.42912	1359935	1360492	558	b1299	puuR	16129260	NP_415815.1		Cytoplasmic	CPR	0
43	81	68.4412	73.6827	1.07658	1364959	1365936	978	b1303	pspF	90111246	NP_415819.4		Cytoplasmic	CPR	1
69	45	160.55	59.842	0.372731	1366103	1366771	669	b1304	pspA	16129265	NP_415820.1				0
13	16	56.2119	39.54	0.70341	1367049	1367408	360	b1306	pspC	16129267	NP_415822.1				0
184	62	909.274	175.106	0.192578	1367713	1368027	315	b1308	pspE	16129269	NP_415824.1				0
19	31	21.156	19.7276	0.932481	1382141	1383538	1398	b1321	ycjX	16129282	NP_415837.1		Cytoplasmic	CPR	0
22	41	32.2467	34.3462	1.06511	1383535	1384596	1062	b1322	ycjF	16129283	NP_415838.1	multipass		MPR	0
334	762	337.171	439.633	1.30389	1384744	1386285	1542	b1323	tyrR	16129284	NP_415839.1		Cytoplasmic	CPR	1
388	363	1191.27	636.969	0.534696	1386329	1386835	507	b1324	tpx	16129285	NP_415840.1		Secreted		1
91	150	146.64	138.144	0.942066	1386954	1387919	966	b1325	ycjG	90111249	NP_415841.4		Cytoplasmic	CPR	1
81	136	172.96	165.97	0.95959	1387894	1388622	729	b1326	mpaA	226524711	NP_415842.2		Cytoplasmic	CPR	0
5	12	8.45081	11.5915	1.37165	1388957	1389877	921	b1327	ycjY	221800781	NP_415843.2				0
72	144	69.4411	79.374	1.14304	1391251	1392864	1614	b1329	mppA	90111250	NP_415845.2		Secreted		1
37	93	223.239	320.688	1.43652	1395389	1395646	258	b1332	ynaJ	16129293	NP_415848.1	multipass		MPR	1
1372	1564	2245.75	1463.11	0.6515	1395696	1396646	951	b1333	uspE	16129294	NP_415849.1		Cytoplasmic	CPR	1
150	214	310.087	252.836	0.815369	1396798	1397550	753	b1334	fnr	16129295	NP_415850.1		Cytoplasmic	CPR	1
20	60	60.3348	103.448	1.71456	1397745	1398260	516	b1335	ogt	16129296	NP_415851.1		Cytoplasmic	CPR	1
10	41	10.7651	25.2252	2.34323	1399834	1401279	1446	b1337	abgB	16129298	NP_415853.1				0
28	30	47.9493	29.3614	0.612343	1402765	1403673	909	b1339	abgR	16129300	NP_415855.1		Cytoplasmic	CPR	1
15	81	41.4	127.769	3.08621	1404003	1404566	564	b1340	smrA	16129301	NP_415856.1		Cytoplasmic	CPR	1
20	56	25.2496	40.4059	1.60026	1404587	1405819	1233	b1341	ydaM	90111253	NP_415857.2		Cytoplasmic	CPR	1
99	276	156.613	249.536	1.59333	1406074	1407057	984	b1342	ydaN	16129303	NP_415858.1				1
22	56	24.9243	36.2594	1.45478	1407535	1408908	1374	b1343	dbpA	16129304	NP_415859.1		Cytoplasmic	CPR	1
59	142	98.1214	134.968	1.37552	1409037	1409972	936	b1344	ttcA	16129305	NP_415860.1		Cytoplasmic	CPR	1
13	83	13.8795	50.6454	3.64894	1421806	1423263	1458	b1363	trkG	16129324	NP_415881.1	multipass		MPR	1
197	152	704.96	310.866	0.44097	1433209	1433643	435	b1376	uspF	90111262	NP_415894.4		Cytoplasmic	CPR	1
480	836	211.968	210.992	0.995398	1435284	1438808	3525	b1378	ydbK	16129339	NP_415896.1				1
183	1157	1066.91	3855.15	3.61338	1439082	1439348	267	b4529	ydbJ	94541111	YP_588453.1				1
44	240	161.92	504.766	3.11738	1439345	1439767	423	b1379	hslJ	16129340	NP_415897.1				1
66	111	103.776	99.7487	0.961193	1439878	1440867	990	b1380	ldhA	16129341	NP_415898.1		Cytoplasmic	CPR	1
54	120	31.8403	40.4387	1.27005	1441075	1443714	2640	b1381	ydbH	16129342	NP_415899.1				0
11	22	52.364	59.8542	1.14304	1443904	1444230	327	b1383	ydbL	90111263	NP_415901.2				0
15	44	15.5664	26.0964	1.67646	1445543	1447042	1500	b1385	feaB	90111264	NP_415903.4		Cytoplasmic	CPR	1
5	22	5.92328	14.8952	2.51469	1460149	1461462	1314	b1398	paaK	16129359	NP_415916.1		Cytoplasmic	CPR	0
40	96	65.4737	89.807	1.37165	1461563	1462513	951	b1399	paaX	16129360	NP_415917.1				0
40	75	105.356	112.9	1.0716	1462495	1463085	591	b1400	paaY	16129361	NP_415918.1		Cytoplasmic	CPR	0
14	33	8.67208	11.6826	1.34716	1463416	1465928	2513	b4492	N/A	N/A	N/A				1
148	261	267.575	269.685	1.00788	1472245	1473105	861	b1406	ydbC	16129367	NP_415924.1		Cytoplasmic	CPR	1
22	37	14.8444	14.2683	0.961193	1473168	1475474	2307	b1407	ydbD	90111266	NP_415925.2				1
8	32	7.08368	16.1939	2.28608	1477162	1478919	1758	b1410	ynbC	16129371	NP_415928.1		Cytoplasmic	CPR	0
220	338	87.7429	77.0438	0.878063	1481085	1484987	3903	b1413	hrpA	145698255	NP_415931.4		Cytoplasmic	CPR	1
99	135	107.019	83.4047	0.779346	1486256	1487695	1440	b1415	aldA	16129376	NP_415933.1		Cytoplasmic	CPR	1
50	112	308.857	395.4	1.28021	1487737	1487988	252	b4493	N/A	N/A	N/A				1
33	78	96.7402	130.683	1.35087	1488926	1489456	531	b1418	cybB	90111268	NP_415935.2	multipass		MPR	1
25	16	223.655	81.8069	0.365773	1489701	1489874	174	b1419	ydcA	16129378	NP_415936.1				1
34	23	352.838	136.413	0.386617	1489946	1490095	150	b4428	hokB	49176107	YP_025301.1		Secreted		1
12	53	11.3831	28.7334	2.52421	1490494	1492134	1641	b1421	trg	16129380	NP_415938.1	multipass		MPR	1
23	46	38.7475	44.29	1.14304	1492172	1493095	924	b1422	ydcI	90111269	NP_415939.2		Cytoplasmic	CPR	1
74	111	85.7078	73.4756	0.85728	1493312	1494655	1344	b1423	ydcJ	16129382	NP_415940.1		Cytoplasmic	CPR	1
41	136	38.54	73.0631	1.89577	1494880	1496535	1656	b1424	mdoD	145698256	NP_415941.5		Secreted		1
127	317	878.636	1253.42	1.42655	1496675	1496899	225	b1426	ydcH	90111271	NP_415943.4				1
62	165	178.725	271.838	1.52098	1496962	1497501	540	b1427	rimL	16129386	NP_415944.1		Cytoplasmic	CPR	1
32	72	50.7772	65.2954	1.28592	1497493	1498473	981	b1428	ydcK	16129387	NP_415945.1		Cytoplasmic	CPR	1
40	196	62.7045	175.601	2.80045	1498597	1499589	993	b1429	tehA	16129388	NP_415946.1	multipass		MPR	0
27	40	70.7563	59.9091	0.846697	1499586	1500179	594	b1430	tehB	16129389	NP_415947.1		Cytoplasmic	CPR	0
61	137	141.936	182.186	1.28358	1500481	1501149	669	b1431	ydcL	16129390	NP_415948.1				1
47	140	60.5145	103.02	1.7024	1501681	1502889	1209	b1432	ydcM	16129391	NP_415949.1				1
38	79	30.149	35.8218	1.18816	1504805	1506766	1962	b1435	ydcP	90111273	NP_415952.2		Cytoplasmic	CPR	1
122	123	165.715	95.486	0.576205	1509678	1510823	1146	b1440	ydcS	16129399	NP_415957.1		Secreted		0
64	195	98.2494	171.087	1.74135	1510841	1511854	1014	b1441	ydcT	16129400	NP_415958.1				0
31	148	51.2269	139.775	2.72855	1511855	1512796	942	b1442	ydcU	16129401	NP_415959.1	multipass		MPR	0
45	86	88.1116	96.2389	1.09224	1512786	1513580	795	b1443	ydcV	16129402	NP_415960.1	multipass		MPR	0
105	205	114.7	127.985	1.11583	1513602	1515026	1425	b1444	patD	16129403	NP_415961.1		Cytoplasmic	CPR	0
10	72	162.15	667.238	4.11495	1515123	1515218	96	b4598	yncL	145698258	YP_001165318.1				1
45	23	299.354	87.4443	0.29211	1515672	1515905	234	b1446	ydcY	16129405	NP_415963.1				1
29	63	100.317	124.551	1.24158	1515906	1516355	450	b1447	ydcZ	16129406	NP_415964.1	multipass		MPR	0
23	51	68.984	87.4223	1.26728	1516352	1516870	519	b1448	mnaT	16129407	NP_415965.1		Cytoplasmic	CPR	0
132	197	197.954	168.845	0.852951	1517051	1518088	1038	b1449	curA	226524714	NP_415966.6		Cytoplasmic	CPR	1
23	50	62.8117	78.0395	1.24244	1531306	1531875	570	b1462	yddH	90111278	NP_415979.2				1
18	55	33.12	57.8378	1.74631	1532048	1532893	846	b1463	nhoA	16129422	NP_415980.1		Cytoplasmic	CPR	1
31	44	53.9774	43.7859	0.81119	1532989	1533882	894	b1464	yddE	16129423	NP_415981.1		Cytoplasmic	CPR	1
5	7	11.1827	8.94763	0.800128	1534638	1535333	696	b1466	narW	16129425	NP_415983.1		Cytoplasmic	CPR	0
18	35	7.48984	8.32338	1.11129	1536874	1540614	3741	b1468	narZ	16129427	NP_415985.1				0
6	25	6.72414	16.0124	2.38133	1540696	1542084	1389	b1469	narU	16129428	NP_415986.1	multipass		MPR	1
687	1098	350.856	320.484	0.913434	1545425	1548472	3048	b1474	fdnG	16129433	NP_415991.1		Secreted		0
150	233	263.837	234.224	0.887762	1548485	1549369	885	b1475	fdnH	16129434	NP_415992.1				0
120	538	285.622	731.853	2.56232	1549362	1550015	654	b1476	fdnI	16129435	NP_415993.1	multipass		MPR	0
13	45	71.0046	140.471	1.97834	1550422	1550706	285	b1477	yddM	145698261	NP_415994.4				1
39	64	60.0484	56.3181	0.93788	1550852	1551862	1011	b1478	adhP	90111280	NP_415995.4		Cytoplasmic	CPR	1
229	276	209.935	144.607	0.688819	1551996	1553693	1698	b1479	maeA	90111281	NP_415996.2				1
33	52	372.24	335.231	0.900577	1553850	1553987	138	b1480	sra	16129439	NP_415997.1		Cytoplasmic	CPR	0
31	69	111.703	142.097	1.27209	1554649	1555080	432	b1482	osmC	16129441	NP_415999.1		Cytoplasmic	CPR	1
5	29	3.243	10.7499	3.31482	1561358	1563757	2400	b1489	dosP	162135902	NP_416006.4				0
22	124	22.2956	71.8207	3.2213	1566978	1568513	1536	b1492	gadC	16129451	NP_416009.1	multipass		MPR	0
4	16	4.44436	10.1602	2.28608	1568669	1570069	1401	b1493	gadB	16129452	NP_416010.1		Cytoplasmic	CPR	0
83	85	23.829	13.9469	0.585292	1590689	1596110	5422	b4696	N/A	N/A	N/A				1
33	55	32.2467	30.7161	0.952534	1596641	1598233	1593	b1511	lsrK	49176118	NP_416028.3		Cytoplasmic	CPR	0
35	91	57.1094	84.8618	1.48595	1598312	1599265	954	b1512	lsrR	16129471	NP_416029.1				0
10	19	10.1344	11.0048	1.08589	1599514	1601049	1536	b1513	lsrA	16129472	NP_416030.1				0
17	25	25.7171	21.6144	0.840471	1601043	1602071	1029	b1514	lsrC	16129473	NP_416031.1	multipass		MPR	0
6	31	9.40567	27.7736	2.95286	1602071	1603063	993	b1515	lsrD	16129474	NP_416032.1	multipass		MPR	0
16	27	24.3462	23.4805	0.964441	1603075	1604097	1023	b1516	lsrB	16129475	NP_416033.1		Secreted		0
10	28	17.7698	28.4363	1.60026	1604124	1604999	876	b1517	lsrF	16129476	NP_416034.1				0
4	7	21.3971	21.4005	1.00016	1605023	1605313	291	b1518	lsrG	16129477	NP_416035.1				0
22	43	45.12	50.4018	1.11706	1605370	1606128	759	b1519	tam	16129478	NP_416036.1		Cytoplasmic	CPR	0
208	268	222.99	164.205	0.736382	1607253	1608704	1452	b1521	uxaB	49176119	YP_025302.1		Cytoplasmic	CPR	1
41	219	67.323	205.521	3.05275	1608931	1609878	948	b1522	yneF	16129481	NP_416039.1	multipass		MPR	1
40	92	172.96	227.355	1.3145	1609990	1610349	360	b1523	yneG	16129482	NP_416040.1				0
24	81	40.3013	77.7364	1.92888	1610349	1611275	927	b1524	yneH	16129483	NP_416041.1				0
46	109	51.5517	69.8142	1.35425	1611339	1612727	1389	b1525	sad	90111288	NP_416042.2		Cytoplasmic	CPR	1
18	77	23.526	57.5173	2.44484	1615052	1616242	1191	b1528	ydeA	16129487	NP_416045.1				1
21	80	49.0832	106.865	2.17722	1616267	1616932	666	b1529	marC	16129488	NP_416046.1	multipass		MPR	1
6	7	42.6476	28.4363	0.666774	1618013	1618231	219	b1532	marB	16129491	NP_416049.1				0
23	73	39.7808	72.1605	1.81396	1618262	1619161	900	b1533	eamA	90111291	NP_416050.4	multipass		MPR	1
95	201	72.2779	87.3997	1.20922	1623359	1625404	2046	b1538	dcp	16129497	NP_416056.1		Cytoplasmic	CPR	1
197	292	410.519	347.762	0.847127	1625541	1626287	747	b1539	ydfG	16129498	NP_416057.1		Cytoplasmic	CPR	1
53	175	120.09	226.621	1.8871	1626376	1627062	687	b1540	ydfH	16129499	NP_416058.1		Cytoplasmic	CPR	1
5	10	44.731	51.1293	1.14304	1635633	1635806	174	b1550	gnsB	90111293	NP_416068.2				1
26	65	190.012	271.49	1.4288	1636479	1636691	213	b1552	cspI	16129511	NP_416070.1		Cytoplasmic	csp	1
4	17	24.4179	59.31	2.42896	1637104	1637358	255	b4689	N/A	226524715	YP_002791241.1				0
255	287	1837.7	1182.08	0.643241	1639363	1639578	216	b1557	cspB	16129516	NP_416075.1		Cytoplasmic	csp	1
5	13	10.3362	15.3592	1.48595	1640513	1641265	753	b1559	ydfT	90111296	NP_416077.4		Cytoplasmic	CPR	0
23	53	229.504	302.253	1.31698	1643143	1643298	156	b1562	hokD	16129521	NP_416080.1		Secreted		1
61	140	329.705	432.469	1.31169	1643370	1643657	288	b1563	relE	16129522	NP_416081.1		Cytoplasmic	CPR	0
13	18	84.3179	66.7238	0.791336	1643657	1643896	240	b1564	relB	16129523	NP_416082.1		Cytoplasmic	CPR	0
20	59	76.3058	128.65	1.68598	1645958	1646365	408	b1570	dicA	16129529	NP_416088.1		Cytoplasmic	CPR	1
45	39	3.42403	1.69598	0.495318	1630310	1650767	20458	b4600	N/A	N/A	N/A				1
7	35	33.3225	95.2225	2.8576	1653371	1653697	327	b1582	ynfA	16129540	NP_416099.1	multipass		MPR	1
75	83	341.368	215.909	0.632483	1653832	1654173	342	b1583	ynfB	16129541	NP_416100.1				0
77	150	213.656	237.874	1.11335	1654208	1654768	561	b1584	speG	16129542	NP_416101.1		Cytoplasmic	CPR	0
22	28	111.915	81.4059	0.72739	1655589	1655894	306	b1586	ynfD	90111300	NP_416103.2		Secreted		1
283	415	181.512	152.124	0.838095	1656093	1658519	2427	b1587	ynfE	16129545	NP_416104.1				0
190	254	122.014	93.2224	0.764032	1658580	1661003	2424	b1588	ynfF	171701681	NP_416105.4				0
28	31	70.5273	44.6265	0.632755	1661014	1661631	618	b1589	ynfG	16129547	NP_416106.1				0
46	110	83.749	114.458	1.36668	1661633	1662487	855	b1590	ynfH	16129548	NP_416107.1	multipass		MPR	0
30	93	75.9336	134.533	1.77171	1662530	1663144	615	b1591	dmsD	90111302	NP_416108.2				0
17	47	21.0524	33.2646	1.58009	1663339	1664595	1257	b1592	clcB	90111303	NP_416109.2	multipass		MPR	1
231	555	516.643	709.42	1.37313	1664548	1665243	696	b1593	ynfK	90111304	NP_416110.4		Cytoplasmic	CPR	1
153	474	195.058	345.368	1.77059	1665368	1666588	1221	b1594	mlc	16129552	NP_416111.1		Cytoplasmic	CPR	1
50	105	62.0669	74.4923	1.20019	1667723	1668976	1254	b1596	ynfM	16129554	NP_416113.1	multipass		MPR	1
75	239	142.029	258.67	1.82124	1669984	1670805	822	b1598	ydgD	16129556	NP_416115.1				1
40	148	60.1599	127.216	2.11463	1671937	1672971	1035	b1601	tqsA	16129559	NP_416118.1	multipass		MPR	1
208	670	233.104	429.133	1.84095	1672996	1674384	1389	b1602	pntB	16129560	NP_416119.1	multipass		MPR	0
237	527	240.654	305.835	1.27085	1674395	1675927	1533	b1603	pntA	16129561	NP_416120.1	multipass		MPR	0
82	181	135.073	170.399	1.26153	1676451	1677395	945	b1604	ydgH	16129562	NP_416121.1				1
31	84	37.0628	57.3968	1.54864	1680906	1682207	1302	b1609	rstB	16129567	NP_416126.1	multipass		MPR	0
24	54	40.1713	51.6571	1.28592	1682283	1683212	930	b1610	tus	16129568	NP_416127.1		Cytoplasmic	CPR	1
84	93	93.1322	58.9298	0.632755	1683209	1684612	1404	b1611	fumC	16129569	NP_416128.1		Cytoplasmic	CPR	1
261	320	246.68	172.853	0.700715	1684755	1686401	1647	b1612	fumA	16129570	NP_416129.1		Cytoplasmic	CPR	1
208	209	275.324	158.11	0.574268	1686600	1687775	1176	b1613	manA	49176125	NP_416130.3		Secreted		1
239	308	246.545	181.585	0.73652	1687876	1689384	1509	b1614	ydgA	16129572	NP_416131.1				1
16	31	13.7452	15.2203	1.10732	1692284	1694095	1812	b1617	uidA	16129575	NP_416134.1		Cytoplasmic	CPR	0
117	195	308.167	293.539	0.952534	1694486	1695076	591	b1618	uidR	16129576	NP_416135.1				1
90	252	136.149	217.874	1.60026	1696176	1697204	1029	b1620	malI	16129578	NP_416137.1		Cytoplasmic	CPR	1
28	79	27.3609	44.1195	1.6125	1697379	1698971	1593	b1621	malX	16129579	NP_416138.1	multipass		MPR	0
41	161	54.4094	122.109	2.24426	1698981	1700153	1173	b1622	malY	16129580	NP_416139.1		Cytoplasmic	CPR	0
83	156	128.943	138.508	1.07418	1700257	1701258	1002	b1623	add	16129581	NP_416140.1		Cytoplasmic	CPR	1
61	125	91.2151	106.826	1.17115	1701292	1702332	1041	b1624	ydgJ	90111307	NP_416141.4		Cytoplasmic	CPR	1
16	128	197.668	903.772	4.57216	1702575	1702700	126	b4409	blr	49176127	YP_025303.1				1
38	70	26.6092	28.0142	1.0528	1704943	1707165	2223	b1629	rsxC	16129587	NP_416146.1		Secreted		0
5	25	12.5333	35.8152	2.8576	1708228	1708848	621	b1631	rsxG	16129589	NP_416148.1				0
13	35	31.8181	48.9588	1.53871	1709547	1710182	636	b1633	nth	16129591	NP_416150.1		Cytoplasmic	CPR	0
36	136	37.2847	80.5006	2.15908	1710793	1712295	1503	b1634	tppB	16129592	NP_416151.1				1
75	77	192.653	113.041	0.586761	1712401	1713006	606	b1635	gstA	16129593	NP_416152.1		Cytoplasmic	CPR	1
63	153	113.505	157.542	1.38798	1713050	1713913	864	b1636	pdxY	16129594	NP_416153.1		Cytoplasmic	CPR	0
238	453	290.572	316.088	1.08781	1713972	1715246	1275	b1637	tyrS	16129595	NP_416154.1		Cytoplasmic	CPR	0
72	139	170.59	188.221	1.10335	1715375	1716031	657	b1638	pdxH	16129596	NP_416155.1		Cytoplasmic	CPR	0
39	111	54.6927	88.965	1.62663	1716517	1717626	1110	b1640	anmK	16129598	NP_416157.1				1
942	3067	3133.23	5830.25	1.86078	1717900	1718367	468	b1641	slyB	49176129	YP_025304.1		Secreted		1
113	285	404.368	582.874	1.44145	1718414	1718848	435	b1642	slyA	90111310	NP_416159.2		Cytoplasmic	CPR	1
13	23	23.5854	23.8484	1.01115	1719288	1720145	858	b1644	ydhJ	90111311	NP_416161.4				0
34	113	26.292	49.9406	1.89946	1720145	1722157	2013	b1645	ydhK	16129603	NP_416162.1	multipass		MPR	0
73	97	217.691	165.318	0.759417	1722158	1722679	522	b1646	sodC	16129604	NP_416163.1		Secreted		1
198	291	343.606	288.616	0.839962	1722760	1723656	897	b1647	ydhF	49176131	YP_025305.1		Cytoplasmic	CPR	1
34	49	48.2019	39.7021	0.823662	1724683	1725780	1098	b1650	nemA	16129608	NP_416167.1		Cytoplasmic	CPR	0
83	88	316.669	191.885	0.605949	1725861	1726268	408	b1651	gloA	16129609	NP_416168.1		Cytoplasmic	CPR	0
76	152	25.6237	29.2889	1.14304	1727111	1731727	4617	b1653	lhr	16129611	NP_416170.1				0
139	209	621.761	534.302	0.859336	1731778	1732125	348	b1654	grxD	16129612	NP_416171.1				1
39	80	74.3982	87.2206	1.17235	1732459	1733274	816	b1655	mepH	16129613	NP_416172.1				1
895	690	2393.8	1054.74	0.440613	1733402	1733983	582	b1656	sodB	16129614	NP_416173.1		Secreted		1
55	211	73.1753	160.441	2.19256	1734145	1735314	1170	b1657	ydhP	16129615	NP_416174.1	multipass		MPR	1
6	34	103.776	336.09	3.23862	1735480	1735569	90	b4602	ynhF	145698270	YP_001165321.1				1
55	132	83.4455	114.458	1.37165	1735868	1736893	1026	b1658	purR	16129616	NP_416175.1		Cytoplasmic	CPR	1
11	43	18.3526	41.0021	2.23412	1736890	1737822	933	b1659	ydhB	16129617	NP_416176.1		Cytoplasmic	CPR	1
325	1084	440.302	839.322	1.90624	1739437	1740585	1149	b1661	cfa	16129619	NP_416178.1		Cytoplasmic	CPR	1
64	123	155.179	170.447	1.09839	1740625	1741266	642	b1662	ribC	16129620	NP_416179.1		Cytoplasmic	CPR	1
83	255	94.0327	165.11	1.75588	1741481	1742854	1374	b1663	mdtK	49176133	YP_025307.1	multipass		MPR	1
198	430	245.198	304.335	1.24118	1742895	1744151	1257	b1664	ydhQ	16129622	NP_416181.1				1
40	109	203.482	316.902	1.55739	1744724	1745029	306	b1667	ydhR	16129623	NP_416182.1				1
37	82	35.8851	45.4525	1.26661	1745155	1746759	1605	b1668	ydhS	16129624	NP_416183.1		Cytoplasmic	CPR	1
17	46	32.5496	50.3369	1.54647	1746771	1747583	813	b1669	ydhT	16129625	NP_416184.1				0
18	73	35.6482	82.6266	2.31783	1747587	1748372	786	b1670	ydhU	16129626	NP_416185.1	multipass		MPR	0
25	42	58.1703	55.8525	0.960154	1748369	1749037	669	b1671	ydhX	226524717	NP_416186.4				0
28	65	67.2621	89.2396	1.32674	1749101	1749748	648	b1672	ydhW	16129628	NP_416187.1		Cytoplasmic	CPR	0
77	188	56.9953	79.5313	1.3954	1749752	1751854	2103	b1673	ydhV	16129629	NP_416188.1		Cytoplasmic	CPR	0
30	63	74.4803	89.3907	1.20019	1751875	1752501	627	b1674	ydhY	16129630	NP_416189.1				0
274	305	301.853	192.034	0.636181	1753722	1755134	1413	b1676	pykF	16129632	NP_416191.1		Cytoplasmic	CPR	1
7725	2403	50738.5	9020.38	0.177782	1755445	1755681	237	b1677	lpp	16129633	NP_416192.1		Secreted		1
134	227	207.552	200.946	0.968173	1755745	1756749	1005	b1678	ynhG	16129634	NP_416193.1		Secreted		1
16	31	59.7271	66.1371	1.10732	1756898	1757314	417	b1679	sufE	16129635	NP_416194.1		Cytoplasmic	CPR	0
50	84	63.7444	61.2045	0.960154	1757327	1758547	1221	b1680	sufS	16129636	NP_416195.1		Cytoplasmic	CPR	0
66	64	80.769	44.7623	0.554202	1758544	1759815	1272	b1681	sufD	16129637	NP_416196.1		Cytoplasmic	CPR	0
27	57	56.264	67.885	1.20654	1759790	1760536	747	b1682	sufC	16129638	NP_416197.1		Cytoplasmic	CPR	0
87	121	91.0131	72.3439	0.794873	1760546	1762033	1488	b1683	sufB	90111315	NP_416198.2				0
22	17	92.8077	40.9866	0.441629	1762042	1762410	369	b1684	sufA	16129640	NP_416199.1		Cytoplasmic	CPR	0
9	16	74.1256	75.3143	1.01604	1762958	1763146	189	b1685	ydiH	226524718	NP_416200.2				0
25	21	94.686	45.4566	0.480077	1763246	1763656	411	b1686	menI	16129642	NP_416201.1		Cytoplasmic	CPR	0
132	186	67.215	54.1299	0.805324	1763653	1766709	3057	b1687	ydiJ	16129643	NP_416202.1		Cytoplasmic	CPR	0
40	215	55.9439	171.855	3.07192	1767098	1768210	1113	b1688	ydiK	16129644	NP_416203.1	multipass		MPR	1
6	8	10.7726	8.209	0.762027	1771813	1772679	867	b1692	ydiB	16129648	NP_416207.1		Cytoplasmic	CPR	0
290	484	189.754	180.997	0.953848	1782758	1785136	2379	b1702	ppsA	16129658	NP_416217.1		Cytoplasmic	CPR	1
51	110	55.246	68.1013	1.23269	1787832	1789268	1437	b1706	ydiU	16129662	NP_416221.1				1
10	29	21.8017	36.1343	1.65741	1789331	1790044	714	b1707	ydiV	16129663	NP_416222.1				1
30	119	100.428	227.674	2.26703	1790291	1790755	465	b1708	nlpC	16129664	NP_416223.1				1
35	92	98.6999	148.275	1.50228	1791582	1792133	552	b1710	btuE	16129666	NP_416225.1		Secreted		0
31	134	49.1904	121.522	2.47044	1792196	1793176	981	b1711	btuC	16129667	NP_416226.1	multipass		MPR	0
308	1043	1598.15	3093.02	1.93538	1793277	1793576	300	b1712	ihfA	16129668	NP_416227.1		Cytoplasmic	CPR	1
544	985	354.611	366.962	1.03483	1793581	1795968	2388	b1713	pheT	16129669	NP_416228.1		Cytoplasmic	CPR	0
102	115	161.359	103.973	0.644361	1795983	1796966	984	b1714	pheS	16129670	NP_416229.1		Cytoplasmic	CPR	0
349	258	1521.76	642.941	0.422499	1797417	1797773	357	b1716	rplT	16129672	NP_416231.1		Cytoplasmic	CPR	0
350	242	2751.63	1087.35	0.395165	1797826	1798023	198	b1717	rpmI	49176137	NP_416232.3		Cytoplasmic	CPR	0
1616	1395	4632.65	2285.57	0.493361	1798120	1798662	543	b1718	infC	16129674	NP_416233.1		Cytoplasmic	CPR	0
2116	2771	1707.54	1277.98	0.748432	1798666	1800594	1929	b1719	thrS	16129675	NP_416234.1		Cytoplasmic	CPR	0
38	125	77.9345	146.517	1.88	1803349	1804107	759	b1722	ydiY	16129676	NP_416236.1				1
153	161	256.092	154.015	0.601404	1804394	1805323	930	b1723	pfkB	49176138	NP_416237.3		Cytoplasmic	CPR	1
43	39	230.019	119.232	0.518356	1805424	1805714	291	b1724	ydiZ	16129678	NP_416238.1				1
533	2379	963.633	2458.16	2.55093	1805820	1806680	861	b1725	yniA	16129679	NP_416239.1				1
41	132	118.849	218.685	1.84002	1806721	1807257	537	b1726	yniB	16129680	NP_416240.1	multipass		MPR	1
32	80	74.458	106.386	1.4288	1807404	1808072	669	b1727	yniC	16129681	NP_416241.1		Cytoplasmic	CPR	1
55	122	61.5051	77.9722	1.26774	1808958	1810349	1392	b1729	ydjN	16129683	NP_416243.1	multipass		MPR	1
34	64	70.5676	75.9168	1.0758	1814410	1815159	750	b1733	chbG	16129687	NP_416247.1		Cytoplasmic	CPR	0
7	38	12.9258	40.1029	3.10254	1816629	1817471	843	b1735	chbR	16129689	NP_416249.1				0
26	210	126.083	582.014	4.61613	1819323	1819643	321	b1738	chbB	16129692	NP_416252.1		Cytoplasmic	CPR	1
163	254	748.472	666.582	0.89059	1819942	1820280	339	b1739	osmE	16129693	NP_416253.1				1
132	92	248.16	98.85	0.398332	1820482	1821309	828	b1740	nadE	16129694	NP_416254.1		Cytoplasmic	CPR	1
22	89	38.5654	89.1654	2.31206	1821539	1822426	888	b1741	cho	16129695	NP_416255.1		Cytoplasmic	CPR	1
12	15	38.4355	27.4583	0.7144	1823164	1823649	486	b1743	spy	16129697	NP_416257.1		Secreted		1
4	22	4.63285	14.5627	3.14336	1824940	1826283	1344	b1745	astB	16129699	NP_416259.1		Cytoplasmic	CPR	0
36	30	69.4411	33.0725	0.476267	1830452	1831258	807	b1749	xthA	16129703	NP_416263.1		Cytoplasmic	CPR	1
56	109	128.572	143.026	1.11242	1832140	1832817	678	b1751	ydjY	90111322	NP_416265.4				0
32	90	70.3565	113.091	1.6074	1832832	1833539	708	b1752	ydjZ	16129706	NP_416266.1	multipass		MPR	0
39	80	110.581	129.639	1.17235	1833539	1834087	549	b1753	ynjA	16129707	NP_416267.1				0
38	62	50.6875	47.2651	0.932481	1834097	1835263	1167	b1754	ynjB	90111323	NP_416268.2				0
157	170	186.844	115.627	0.618844	1837491	1838798	1308	b1757	ynjE	90111324	NP_416271.4		Secreted		1
38	201	95.2532	287.954	3.02304	1838807	1839427	621	b1758	ynjF	90111325	NP_416272.2	multipass		MPR	1
62	122	71.8092	80.757	1.1246	1840395	1841738	1344	b1761	gdhA	16129715	NP_416275.1		Secreted		1
193	267	153.125	121.069	0.790652	1843023	1844984	1962	b1763	topB	16129717	NP_416277.1		Cytoplasmic	CPR	0
397	518	591.94	441.417	0.745712	1844989	1846032	1044	b1764	selD	16129718	NP_416278.1		Cytoplasmic	CPR	0
137	142	386.34	228.859	0.592379	1846149	1846700	552	b1765	ydjA	16129719	NP_416279.1				0
94	227	78.7959	108.751	1.38016	1846861	1848717	1857	b1766	sppA	16129720	NP_416280.1				1
38	40	58.1635	34.9912	0.6016	1848884	1849900	1017	b1767	ansA	16129721	NP_416281.1		Cytoplasmic	CPR	0
17	59	41.2194	81.7592	1.98351	1849911	1850552	642	b1768	pncA	90111327	NP_416282.4		Cytoplasmic	CPR	0
43	42	245.185	136.869	0.558229	1859726	1859998	273	b1777	yeaC	90111329	NP_416291.4				1
126	153	473.759	328.784	0.693989	1860040	1860453	414	b1778	msrB	16129732	NP_416292.1		Cytoplasmic	CPR	1
4301	2503	6721.99	2235.74	0.332601	1860795	1861790	996	b1779	gapA	16129733	NP_416293.1		Cytoplasmic	CPR	1
102	163	179.409	163.857	0.913312	1861874	1862758	885	b1780	yeaD	90111330	NP_416294.4		Cytoplasmic	CPR	1
33	82	60.0808	85.3232	1.42014	1862806	1863660	855	b1781	yeaE	16129735	NP_416295.1		Cytoplasmic	CPR	1
42	59	87.5218	70.2669	0.80285	1863750	1864496	747	b1782	mipA	16129736	NP_416296.1		Secreted		1
427	593	343.506	272.642	0.793704	1864932	1866866	1935	b1783	yeaG	16129737	NP_416297.1		Cytoplasmic	CPR	0
121	289	146.693	200.241	1.36504	1866979	1868262	1284	b1784	yeaH	16129738	NP_416298.1		Cytoplasmic	CPR	0
32	77	98.8342	135.919	1.37522	1871598	1872101	504	b1787	yeaK	16129741	NP_416301.1		Cytoplasmic	CPR	1
12	62	22.7246	67.1026	2.95286	1872779	1873600	822	b1790	yeaM	16129744	NP_416304.1		Cytoplasmic	CPR	1
42	66	187.87	168.727	0.898103	1874933	1875280	348	b1792	yeaO	90111333	NP_416306.2				1
43	110	65.2392	95.3816	1.46203	1875739	1876764	1026	b1794	yeaP	90111334	NP_416308.4				1
81	70	506.376	250.103	0.493906	1877031	1877279	249	b1795	yeaQ	16129749	NP_416309.1	multipass		MPR	1
117	356	197.107	342.766	1.73898	1878910	1879833	924	b1799	dmlR	90111335	NP_416313.4				1
16	45	22.9339	36.864	1.6074	1879936	1881021	1086	b1800	dmlA	16129754	NP_416314.1		Cytoplasmic	CPR	1
48	88	66.2399	69.4054	1.04779	1884888	1886015	1128	b1804	rnd	16129758	NP_416318.1		Cytoplasmic	CPR	1
18	109	16.6189	57.516	3.46087	1886085	1887770	1686	b1805	fadD	16129759	NP_416319.1		Cytoplasmic	CPR	1
52	224	139.081	342.408	2.46193	1887975	1888556	582	b1806	yeaY	16129760	NP_416320.1		Secreted		1
55	116	44.8012	54.0029	1.20539	1889349	1891259	1911	b1808	yoaA	16129762	NP_416322.1		Cytoplasmic	CPR	1
31	27	139.872	69.6248	0.497776	1891391	1891735	345	b1809	yoaB	90111336	NP_416323.4		Cytoplasmic	CPR	1
16	70	83.0207	207.585	2.5004	1892157	1892456	300	b1810	yoaC	226524724	NP_416324.2				1
21	41	181.608	202.643	1.11583	1892576	1892755	180	b1811	yoaH	16129765	NP_416325.1				1
30	55	34.2872	35.9257	1.04779	1892829	1894190	1362	b1812	pabB	16129766	NP_416326.1		Cytoplasmic	CPR	0
275	659	313.608	429.509	1.36957	1894956	1896320	1365	b1814	sdaA	16129768	NP_416328.1		Cytoplasmic	CPR	1
62	176	61.9856	100.564	1.62238	1898053	1899609	1557	b1816	yoaE	16129770	NP_416330.1	multipass		MPR	1
2335	2719	3739.46	2488.64	0.665509	1900072	1901043	972	b1817	manX	16129771	NP_416331.1		Cytoplasmic	CPR	0
1464	2142	2845.09	2379.07	0.8362	1901106	1901906	801	b1818	manY	16129772	NP_416332.1	multipass		MPR	0
1604	3942	2899.94	4073.17	1.40457	1901910	1902770	861	b1819	manZ	49176154	NP_416333.3				0
18	67	61.0446	129.862	2.12733	1902825	1903283	459	b1820	yobD	16129774	NP_416334.1	multipass		MPR	1
27	65	51.8879	71.3917	1.37588	1904275	1905084	810	b1822	rlmA	16129776	NP_416336.1		Cytoplasmic	CPR	1
235	632	1741.95	2677.42	1.53702	1905250	1905459	210	b1823	cspC	16129777	NP_416337.1		Cytoplasmic	csp	0
283	552	3059.23	3410.33	1.11477	1905472	1905615	144	b1824	yobF	16129778	NP_416338.1				0
67	514	362.135	1587.78	4.3845	1906285	1906572	288	b1825	yebO	16129779	NP_416339.1				1
72	513	778.319	3169.38	4.07208	1906647	1906790	144	b1826	mgrB	16129780	NP_416340.1				1
109	191	214.234	214.55	1.00147	1907332	1908123	792	b1827	kdgR	16129781	NP_416341.1		Cytoplasmic	CPR	1
102	233	180.019	235.021	1.30553	1909719	1910600	882	b1829	htpX	16129783	NP_416343.1	multipass		MPR	1
242	670	183.849	290.906	1.58231	1910792	1912840	2049	b1830	prc	16129784	NP_416344.1				0
173	274	385.262	348.733	0.905182	1912860	1913558	699	b1831	proQ	49176156	YP_026161.1		Cytoplasmic	CPR	0
64	185	200.05	330.493	1.65205	1913655	1914152	498	b1832	msrC	171701682	NP_416346.4				1
34	164	41.2194	113.631	2.75675	1914282	1915565	1284	b1833	yebS	16129786	NP_416347.1	multipass		MPR	0
62	155	36.6407	52.3522	1.4288	1915534	1918167	2634	b1834	yebT	90111340	NP_416348.2				0
21	40	22.701	24.7125	1.08861	1918247	1919686	1440	b1835	rsmF	90111341	NP_416349.2		Cytoplasmic	CPR	1
20	14	131.362	52.5532	0.400064	1919804	1920040	237	b1836	yebV	90111342	NP_416350.4				1
22	129	178.365	597.734	3.35119	1920145	1920336	192	b1837	yebW	90111343	NP_416351.2				1
21	103	49.7556	139.473	2.80317	1920337	1920993	657	b1838	pphA	90111344	NP_416352.4		Cytoplasmic	CPR	1
50	91	227.579	236.72	1.04017	1921389	1921730	342	b1839	yebY	16129792	NP_416353.1				0
111	267	197.923	272.092	1.37474	1921743	1922615	873	b1840	yebZ	16129793	NP_416354.1	multipass		MPR	0
44	66	182.646	156.578	0.85728	1922619	1922993	375	b1841	yobA	16129794	NP_416355.1		Secreted		0
15	50	35.5397	67.7055	1.90507	1923464	1924120	657	b1843	yobB	16129796	NP_416357.1				0
46	137	34.743	59.1374	1.70214	1924803	1926863	2061	b1845	ptrB	16129798	NP_416359.1				1
62	98	146.23	132.1	0.903371	1927072	1927731	660	b1846	yebE	16129799	NP_416360.1				1
68	142	296.503	353.867	1.19347	1928058	1928414	357	b1847	yebF	145698278	NP_416361.2		Secreted		1
272	176	1455	538.07	0.369807	1928481	1928771	291	b1848	yebG	16129801	NP_416362.1				1
13	32	17.164	24.1466	1.40682	1928905	1930083	1179	b1849	purT	16129802	NP_416363.1				1
161	274	390.372	379.695	0.97265	1930139	1930780	642	b1850	eda	16129803	NP_416364.1		Cytoplasmic	CPR	1
142	164	121.988	80.5202	0.660066	1930817	1932628	1812	b1851	edd	16129804	NP_416365.1		Cytoplasmic	CPR	1
179	196	188.779	118.138	0.625799	1932863	1934338	1476	b1852	zwf	16129805	NP_416366.1		Cytoplasmic	CPR	1
56	149	100.197	152.365	1.52065	1934676	1935545	870	b1853	yebK	16129806	NP_416367.1		Cytoplasmic	CPR	1
613	712	661.275	438.968	0.663821	1935673	1937115	1443	b1854	pykA	16129807	NP_416368.1		Cytoplasmic	CPR	1
50	105	80.074	96.1042	1.20019	1937246	1938217	972	b1855	lpxM	16129808	NP_416369.1				1
81	297	95.3044	199.717	2.09557	1938337	1939659	1323	b1856	mepM	90111345	NP_416370.2				1
69	121	115.121	115.378	1.00223	1939675	1940607	933	b1857	znuA	90111346	NP_416371.4		Secreted		1
122	426	251.204	501.311	1.99564	1940686	1941441	756	b1858	znuC	16129811	NP_416372.1				0
83	380	164.378	430.111	2.6166	1941438	1942223	786	b1859	znuB	16129812	NP_416373.1	multipass		MPR	0
49	132	75.4454	116.156	1.53961	1942370	1943380	1011	b1860	ruvB	16129813	NP_416374.1		Cytoplasmic	CPR	0
35	90	89.0234	130.831	1.46962	1943389	1944000	612	b1861	ruvA	16129814	NP_416375.1		Cytoplasmic	CPR	0
79	182	235.583	310.185	1.31667	1944879	1945400	522	b1863	ruvC	16129816	NP_416377.1		Cytoplasmic	CPR	0
188	221	394.937	265.334	0.67184	1945435	1946175	741	b1864	yebC	16129817	NP_416378.1		Cytoplasmic	CPR	0
94	164	323.011	322.081	0.997121	1946204	1946656	453	b1865	nudB	16129818	NP_416379.1				0
503	690	441.618	346.226	0.783994	1946774	1948546	1773	b1866	aspS	16129819	NP_416380.1		Cytoplasmic	CPR	1
81	661	318.403	1485	4.66389	1950290	1950685	396	b1869	yecN	90111349	NP_416383.4				0
28	87	58.5832	104.032	1.7758	1950726	1951469	744	b1870	cmoA	16129823	NP_416384.1		Cytoplasmic	CPR	0
50	120	80.074	109.833	1.37165	1951466	1952437	972	b1871	cmoB	16129824	NP_416385.1		Cytoplasmic	CPR	0
68	182	141.702	216.756	1.52966	1956544	1957290	747	b1874	cutC	90111351	YP_025309.2		Cytoplasmic	CPR	1
75	98	67.3286	50.2801	0.746787	1958086	1959819	1734	b1876	argS	16129828	NP_416390.1		Cytoplasmic	CPR	1
17	37	12.7286	15.8331	1.2439	1960996	1963074	2079	b1879	flhA	16129831	NP_416393.1	multipass		MPR	0
17	39	45.7044	59.9246	1.31113	1975290	1975868	579	b1891	flhC	16129843	NP_416405.1		Cytoplasmic	CPR	0
72	174	78.6512	108.631	1.38117	1978212	1979636	1425	b1896	otsA	16129848	NP_416410.1		Cytoplasmic	CPR	0
92	236	178.79	262.119	1.46607	1979611	1980411	801	b1897	otsB	16129849	NP_416411.1				0
3480	14540	5488.45	13105.9	2.3879	1980578	1981564	987	b4460	araH	145698280	YP_026162.2	multipass		MPR	0
4827	9595	4959.67	5634.45	1.13606	1981579	1983093	1515	b1900	araG	16129850	NP_416413.1				0
6394	5368	10053.7	4823.88	0.479813	1983163	1984152	990	b1901	araF	16129851	NP_416414.1		Secreted		0
150	495	463.285	873.764	1.88602	1984949	1985452	504	b1902	ftnB	16129852	NP_416415.1		Cytoplasmic	CPR	1
63	104	196.924	185.79	0.943462	1986740	1987237	498	b1905	ftnA	16129855	NP_416418.1		Cytoplasmic	CPR	1
18	41	116.748	151.982	1.3018	1987275	1987514	240	b1906	yecH	16129856	NP_416419.1				1
35	80	44.9524	58.7228	1.30633	1987705	1988916	1212	b1907	tyrP	16129857	NP_416420.1	multipass		MPR	1
381	784	890.509	1047.28	1.17604	1988978	1989643	666	b1908	yecA	16129858	NP_416421.1		Cytoplasmic	CPR	1
82	475	232.503	769.734	3.31064	1990293	1990841	549	b1912	pgsA	16129859	NP_416422.1	multipass		MPR	1
202	301	171.544	146.091	0.851622	1990898	1992730	1833	b1913	uvrC	90111354	NP_416423.4		Cytoplasmic	CPR	0
116	404	274.84	547.061	1.99047	1992727	1993383	657	b1914	uvrY	16129861	NP_416424.1		Cytoplasmic	CPR	0
19	63	40.9075	77.5214	1.89504	1994134	1994856	723	b1916	sdiA	16129863	NP_416426.1		Cytoplasmic	CPR	1
45	80	93.0262	94.518	1.01604	1995086	1995838	753	b1917	yecC	16129864	NP_416427.1				0
44	84	102.38	111.705	1.09108	1995835	1996503	669	b1918	yecS	16129865	NP_416428.1	multipass		MPR	0
78	90	123.017	81.1231	0.659447	1996518	1997504	987	b1919	dcyD	90111355	NP_416429.4		Cytoplasmic	CPR	0
146	206	283.732	228.799	0.806392	1997609	1998409	801	b1920	fliY	16129867	NP_416430.1		Secreted		0
53	233	55.1114	138.469	2.51253	2000134	2001630	1497	b1923	fliC	16129870	NP_416433.1		Secreted		1
79	213	82.6441	127.349	1.54093	2004180	2005667	1488	b1927	amyA	16129874	NP_416437.1		Cytoplasmic	CPR	1
80	71	300.8	152.573	0.507224	2005701	2006114	414	b1928	yedD	16129875	NP_416438.1				1
104	292	134.237	215.405	1.60465	2006301	2007506	1206	b1929	yedE	16129876	NP_416439.1	multipass		MPR	0
14	34	15.8609	22.0146	1.38798	2014578	2015951	1374	b1941	fliI	16129888	NP_416451.1		Cytoplasmic	CPR	0
23	44	35.6246	38.9499	1.09334	2018111	2019115	1005	b1945	fliM	16129892	NP_416455.1				0
18	19	148.251	89.4358	0.603271	2022659	2022847	189	b1952	dsrB	16129899	NP_416462.1				1
30	42	204.821	163.883	0.800128	2023010	2023237	228	b1953	yodD	90111359	NP_416463.4				1
43	79	82.0287	86.1304	1.05	2023535	2024350	816	b1955	yedP	16129901	NP_416464.1		Cytoplasmic	CPR	1
68	186	62.4492	97.6254	1.56328	2024347	2026041	1695	b1956	yedQ	90111360	NP_416465.2	multipass	Cytoplasmic	CPR	1
37	47	314.73	228.489	0.725985	2026212	2026394	183	b1957	yodC	16129903	NP_416466.1				1
56	159	94.9583	154.09	1.62271	2026473	2027390	918	b1958	yedI	16129904	NP_416467.1	multipass		MPR	1
47	148	79.4376	142.962	1.79968	2027563	2028483	921	b1959	yedA	16129905	NP_416468.1	multipass		MPR	1
28	61	30.7159	38.2443	1.2451	2028923	2030341	1419	b1961	dcm	16129907	NP_416470.1		Cytoplasmic	CPR	0
20	43	44.731	54.964	1.22877	2030408	2031103	696	b1962	yedJ	16129908	NP_416471.1		Cytoplasmic	CPR	0
50	82	91.352	85.6236	0.937293	2033859	2034710	852	b1967	hchA	16129913	NP_416476.1		Cytoplasmic	CPR	1
13	24	30.1135	31.7732	1.05511	2036176	2036847	672	b1969	yedW	90111362	NP_416478.2		Cytoplasmic	CPR	0
287	1221	559.844	1361.23	2.43145	2041675	2042472	798	b1976	mtfA	90111364	NP_416484.2		Cytoplasmic	CPR	1
54	138	11.8777	17.348	1.46055	2042962	2050038	7077	b1978	yeeJ	145698281	NP_416485.4		Secreted		1
43	190	50.8242	128.347	2.52532	2051667	2052983	1317	b1981	shiA	16129925	NP_416488.1	multipass		MPR	1
97	180	103.776	110.06	1.06055	2053085	2054539	1455	b1982	amn	16129926	NP_416489.1		Cytoplasmic	CPR	1
36	61	78.1576	75.6885	0.968409	2054882	2055598	717	b1983	yeeN	16129927	NP_416490.1		Cytoplasmic	CPR	1
22	170	23.0148	101.64	4.41629	2056227	2057714	1488	b1985	yeeO	226524727	NP_416491.2	multipass		MPR	1
54	184	90.0948	175.451	1.9474	2060415	2061347	933	b1990	erfK	16129931	NP_416494.1				1
87	170	125.396	140.038	1.11676	2061412	2062491	1080	b1991	cobT	16129932	NP_416495.1		Cytoplasmic	CPR	0
50	98	104.613	117.185	1.12018	2062503	2063246	744	b1992	cobS	16129933	NP_416496.1	multipass		MPR	0
22	42	62.7217	68.4346	1.09108	2063243	2063788	546	b1993	cobU	16129934	NP_416497.1		Cytoplasmic	CPR	0
105	121	52.3869	34.5025	0.658609	2069563	2072682	3120	b2000	flu	49176177	YP_026164.1		Secreted		1
5	26	5.0771	15.0887	2.97191	2072803	2074335	1533	b2001	yeeR	90111368	NP_416505.2	multipass		MPR	0
179	117	844.358	315.422	0.373564	2077056	2077385	330	b2007	yeeX	145698283	NP_416511.4		Cytoplasmic	CPR	1
34	172	49.9771	144.495	2.89122	2077557	2078615	1059	b2008	yeeA	16129949	NP_416512.1	multipass		MPR	1
99	168	325.121	315.319	0.969853	2078813	2079286	474	b2009	sbmC	16129950	NP_416513.1		Cytoplasmic	CPR	1
21	63	28.0115	48.0274	1.71456	2079405	2080571	1167	b2010	dacD	162135904	NP_416514.4				1
84	84	91.567	52.3324	0.57152	2080780	2082207	1428	b2011	sbcB	16129952	NP_416515.1				1
17	18	116.065	70.2356	0.605139	2082250	2082477	228	b2012	yeeD	16129953	NP_416516.1				0
90	234	150.642	223.848	1.48595	2085353	2086282	930	b2015	yeeY	90111371	NP_416519.4		Cytoplasmic	CPR	1
363	712	684.921	767.795	1.121	2086328	2087152	825	b2016	yeeZ	16129957	NP_416520.1		Cytoplasmic	CPR	1
13	11	79.358	38.3771	0.483594	2087235	2087489	255	b4539	yoeB	94541116	YP_588458.1				0
60	74	103.776	73.149	0.704875	2088216	2089115	900	b2019	hisG	16129960	NP_416523.1		Cytoplasmic	CPR	0
72	72	85.8835	49.0842	0.57152	2089121	2090425	1305	b2020	hisD	16129961	NP_416524.1		Cytoplasmic	CPR	0
34	52	49.4171	43.195	0.87409	2090422	2091492	1071	b2021	hisC	16129962	NP_416525.1		Cytoplasmic	CPR	0
58	66	84.5365	54.9784	0.650351	2091492	2092559	1068	b2022	hisB	90111373	NP_416526.4		Cytoplasmic	CPR	0
35	37	92.1867	55.6972	0.604179	2092559	2093149	591	b2023	hisH	16129964	NP_416527.1		Cytoplasmic	CPR	0
38	69	80.1521	83.1787	1.03776	2093149	2093886	738	b2024	hisA	90111374	NP_416528.2		Cytoplasmic	CPR	0
50	69	100.17	79.0037	0.788698	2093868	2094644	777	b2025	hisF	16129966	NP_416529.1		Cytoplasmic	CPR	0
48	49	122.089	71.2302	0.583427	2094638	2095249	612	b2026	hisI	16129967	NP_416530.1		Cytoplasmic	CPR	0
137	370	217.39	335.546	1.54352	2095345	2096325	981	b2027	wzzB	90111375	NP_416531.4	multipass		MPR	1
559	836	618.451	528.605	0.854725	2097886	2099292	1407	b2029	gnd	16129970	NP_416533.1		Cytoplasmic	CPR	1
53	194	236.395	494.533	2.09198	2099420	2099768	349	b4571	N/A	N/A	N/A				1
80	215	111.288	170.934	1.53596	2101415	2102533	1119	b2032	wbbK	16129972	NP_416536.1				0
85	308	223.882	463.642	2.07092	2102518	2103108	591	b2033	wbbJ	16129973	NP_416537.1				0
48	149	75.2454	133.492	1.77409	2103089	2104081	993	b2034	wbbI	16129974	NP_416538.1		Cytoplasmic	CPR	0
74	195	98.7071	148.656	1.50603	2104084	2105250	1167	b2035	wbbH	16129975	NP_416539.1				0
118	236	166.38	190.179	1.14304	2105250	2106353	1104	b2036	glf	16129976	NP_416540.1		Cytoplasmic	CPR	0
47	190	58.6234	135.444	2.3104	2106361	2107608	1248	b2037	rfbX	16129977	NP_416541.1	multipass		MPR	0
27	58	75.3212	92.4726	1.22771	2107605	2108162	558	b2038	rfbC	16129978	NP_416542.1		Cytoplasmic	CPR	0
66	157	116.483	158.362	1.35953	2108162	2109043	882	b2039	rfbA	16129979	NP_416543.1		Cytoplasmic	CPR	0
56	79	96.8575	78.0915	0.806252	2109101	2110000	900	b2040	rfbD	16129980	NP_416544.1		Cytoplasmic	CPR	0
57	114	81.702	93.3887	1.14304	2110000	2111085	1086	b2041	rfbB	16129981	NP_416545.1		Cytoplasmic	CPR	0
114	192	198.497	191.066	0.962561	2111458	2112351	894	b2042	galF	16129982	NP_416546.1		Cytoplasmic	CPR	1
82	130	80.5835	73.0142	0.906069	2135926	2137509	1584	b2063	yegH	90111378	NP_416567.4	multipass		MPR	1
130	291	109.149	139.638	1.27933	2137783	2139636	1854	b2064	asmA	16130004	NP_416568.1				1
125	261	334.33	398.967	1.19333	2139658	2140239	582	b2065	dcd	16130005	NP_416569.1		Cytoplasmic	CPR	1
29	52	70.3154	72.0589	1.0248	2140331	2140972	642	b2066	udk	90111379	NP_416570.2		Cytoplasmic	CPR	1
93	266	43.6309	71.3222	1.63467	2141290	2144607	3318	b2067	yegE	16130007	NP_416571.1				1
36	85	66.0059	89.0698	1.34942	2144716	2145564	849	b2068	alkA	16130008	NP_416572.1				1
18	24	20.7092	15.7809	0.762027	2145698	2147050	1353	b2069	yegD	90111380	NP_416573.4		Cytoplasmic	CPR	1
18	93	14.3911	42.4949	2.95286	2147063	2149009	1947	b2070	yegI	16130010	NP_416574.1		Cytoplasmic	CPR	1
8	21	18.8683	28.3071	1.50024	2150493	2151152	660	b2073	yegL	16130013	NP_416577.1				0
8	26	9.97845	18.5344	1.85744	2152040	2153287	1248	b2074	mdtA	90111381	NP_416578.2				0
19	40	9.47042	11.3948	1.2032	2153287	2156409	3123	b2075	mdtB	16130015	NP_416579.1	multipass		MPR	0
35	102	75.3559	125.511	1.66557	2162300	2163022	723	b2079	baeR	16130019	NP_416583.1		Cytoplasmic	CPR	1
24	51	112.19	136.253	1.21448	2163213	2163545	333	b2080	yegP	90111382	NP_416584.4				1
29	58	33.1443	37.8853	1.14304	2163692	2165053	1362	b2081	yegQ	16130021	NP_416585.1		Cytoplasmic	CPR	1
14	36	24.2144	35.586	1.46962	2166736	2167635	900	b2086	yegS	16130026	NP_416590.1		Cytoplasmic	CPR	1
1936	3014	2894.96	2575.8	0.889753	2169857	2170897	1041	b2091	gatD	16130029	NP_416594.1		Cytoplasmic	CPR	0
7682	31161	8818.65	20444.2	2.3183	2170945	2172300	1356	b2092	gatC	16130030	NP_416595.1	multipass		MPR	0
792	2092	4325.82	6530.35	1.50962	2172304	2172588	285	b2093	gatB	16130031	NP_416596.1		Cytoplasmic	CPR	0
1753	4007	6023.81	7869.38	1.30638	2172619	2173071	453	b2094	gatA	16130032	NP_416597.1				0
7415	12719	9138.93	8959.2	0.980333	2173081	2174343	1263	b2095	gatZ	16130033	NP_416598.1		Cytoplasmic	CPR	0
5387	6993	9807.73	7276.4	0.741905	2174372	2175226	855	b2096	gatY	90111384	NP_416599.2		Cytoplasmic	CPR	0
104	165	153.742	139.404	0.906739	2175534	2176586	1053	b2097	fbaB	90111385	NP_416600.4				1
15	29	24.1714	26.7079	1.10494	2179118	2180083	966	b2100	yegV	16130038	NP_416603.1		Cytoplasmic	CPR	0
37	101	77.1026	120.287	1.5601	2180057	2180803	747	b2101	yegW	16130039	NP_416604.1		Cytoplasmic	CPR	1
23	28	44.6975	31.0989	0.695764	2181738	2182538	801	b2103	thiD	16130041	NP_416606.1				0
4	23	7.8917	25.934	3.28624	2182535	2183323	789	b2104	thiM	16130042	NP_416607.1				0
7	9	20.0672	14.7456	0.734812	2189702	2190244	543	b2111	yehD	16130049	NP_416614.1				0
367	421	514.672	337.426	0.655613	2191081	2192190	1110	b2113	mrp	90111388	NP_416616.4				1
122	148	93.3677	64.7337	0.69332	2192322	2194355	2034	b2114	metG	16130052	NP_416617.1		Cytoplasmic	CPR	1
63	253	208.213	477.88	2.29515	2209748	2210218	471	b2124	yehS	16130062	NP_416628.1		Cytoplasmic	CPR	1
78	104	168.636	128.505	0.762027	2210265	2210984	720	b2125	yehT	90111392	NP_416629.4		Cytoplasmic	CPR	0
87	202	80.3248	106.589	1.32698	2210981	2212666	1686	b2126	yehU	16130064	NP_416630.1	multipass		MPR	0
27	85	57.417	103.306	1.79923	2212888	2213619	732	b2127	mlrA	16130065	NP_416631.1		Cytoplasmic	CPR	1
35	59	74.4294	71.7068	0.96342	2213767	2214498	732	b2128	yehW	16130066	NP_416632.1	multipass		MPR	0
11	37	18.4714	35.5092	1.92239	2214503	2215429	927	b2129	yehX	16130067	NP_416633.1				0
78	190	52.8363	73.5568	1.39216	2217714	2220011	2298	b2132	bglX	16130070	NP_416636.1		Secreted		1
259	337	234.947	174.716	0.743638	2220207	2221922	1716	b2133	dld	16130071	NP_416637.1				1
29	47	48.3843	44.8163	0.926257	2221960	2222892	933	b2134	pbpG	162135905	NP_416638.4		Secreted		1
13	85	34.4155	128.606	3.73686	2223066	2223653	588	b2135	yohC	90111394	NP_416639.2	multipass		MPR	1
63	325	169.375	499.372	2.94832	2223823	2224401	579	b2136	yohD	90111395	NP_416640.2	multipass		MPR	1
30	57	61.285	66.5487	1.08589	2224531	2225292	762	b2137	yohF	16130075	NP_416641.1		Cytoplasmic	CPR	1
68	225	265.292	501.683	1.89106	2228646	2229044	399	b2141	yohJ	16130079	NP_416646.1	multipass		MPR	0
64	216	143.139	276.098	1.92888	2229041	2229736	696	b2142	yohK	16130080	NP_416647.1	multipass		MPR	0
98	181	172.374	181.951	1.05556	2229866	2230750	885	b2143	cdd	16130081	NP_416648.1				1
442	581	555.314	417.181	0.751252	2232055	2233293	1239	b2146	preT	16130084	NP_416651.1		Cytoplasmic	CPR	0
563	937	709.051	674.436	0.95118	2233287	2234522	1236	b2147	preA	90111398	NP_416652.4		Cytoplasmic	CPR	0
151	433	232.495	381.027	1.63886	2234765	2235775	1011	b2148	mglC	16130086	NP_416653.1	multipass		MPR	0
143	307	146.351	179.568	1.22697	2235791	2237311	1521	b2149	mglA	16130087	NP_416654.1				0
477	608	743.26	541.449	0.728479	2237372	2238370	999	b2150	mglB	16130088	NP_416655.1		Secreted		0
65	116	97.1964	99.1349	1.01994	2238650	2239690	1041	b2151	galS	16130089	NP_416656.1		Cytoplasmic	CPR	1
31	117	41.6717	89.887	2.15703	2239832	2240989	1158	b2152	yeiB	16130090	NP_416657.1	multipass		MPR	0
61	99	141.936	131.652	0.927549	2241006	2241674	669	b2153	folE	16130091	NP_416658.1		Cytoplasmic	CPR	0
105	132	195.277	140.303	0.718483	2241932	2242768	837	b2154	yeiG	16130092	NP_416659.1				1
12	58	9.37734	25.9035	2.76235	2242800	2244791	1992	b2155	cirA	16130093	NP_416660.1		Secreted		1
59	223	62.4773	134.961	2.16015	2245085	2246554	1470	b2156	lysP	16130094	NP_416661.1	multipass		MPR	1
137	398	241.791	401.452	1.66033	2246759	2247640	882	b2157	yeiE	16130095	NP_416662.1				1
31	91	45.9579	77.103	1.67769	2247739	2248788	1050	b2158	yeiH	16130096	NP_416663.1	multipass		MPR	1
26	27	47.1709	27.996	0.593502	2248862	2249719	858	b2159	nfo	16130097	NP_416664.1		Cytoplasmic	CPR	1
88	268	80.9599	140.914	1.74054	2257741	2259432	1692	b2167	fruA	16130105	NP_416672.1	multipass		MPR	0
32	56	53.0484	53.0569	1.00016	2259449	2260387	939	b2168	fruK	16130106	NP_416673.1		Cytoplasmic	CPR	0
25	31	34.4085	24.3848	0.708685	2260387	2261517	1131	b2169	fruB	16130107	NP_416674.1		Cytoplasmic	CPR	0
46	156	60.5798	117.416	1.9382	2261885	2263066	1182	b2170	setB	16130108	NP_416675.1	multipass		MPR	1
37	30	100.516	46.5786	0.463395	2263472	2264044	573	b2171	yeiP	90111399	NP_416676.4		Cytoplasmic	CPR	1
201	297	213.282	180.113	0.844485	2264267	2265733	1467	b2172	yeiQ	16130110	NP_416677.1		Cytoplasmic	CPR	1
19	22	29.9657	19.8301	0.66176	2265851	2266837	987	b2173	yeiR	16130111	NP_416678.1		Cytoplasmic	CPR	0
60	388	164.724	608.791	3.69583	2268001	2268567	567	b2175	mepS	16130113	NP_416680.1				1
26	78	25.994	44.5682	1.71456	2268748	2270304	1557	b2176	rtn	16130114	NP_416681.1	multipass		MPR	1
52	131	44.5979	64.2117	1.43979	2270386	2272200	1815	b2177	yejA	90111401	NP_416682.4		Secreted		0
47	139	71.308	120.528	1.69024	2273295	2274320	1026	b2179	yejE	16130117	NP_416684.1	multipass		MPR	0
178	474	174.265	265.217	1.52191	2274322	2275911	1590	b2180	yejF	16130118	NP_416685.1				0
230	539	1037.76	1389.92	1.33935	2275915	2276259	345	b2181	yejG	16130119	NP_416686.1				1
70	236	91.4901	176.287	1.92684	2276592	2277782	1191	b2182	bcr	16130120	NP_416687.1	multipass		MPR	1
65	115	145.376	146.997	1.01115	2277810	2278505	696	b2183	rsuA	16130121	NP_416688.1		Cytoplasmic	CPR	1
51	46	45.0815	23.239	0.515489	2278654	2280414	1761	b2184	yejH	16130122	NP_416689.1		Cytoplasmic	CPR	1
526	1507	2872.95	4704.22	1.63742	2280539	2280823	285	b2185	rplY	16130123	NP_416690.1		Cytoplasmic	CPR	1
89	116	137.441	102.38	0.744903	2280962	2281969	1008	b2186	yejK	16130124	NP_416691.1		Cytoplasmic	CPR	1
76	185	67.1803	93.4613	1.3912	2282398	2284158	1761	b2188	yejM	16130126	NP_416693.1	multipass		MPR	0
69	189	42.5378	66.5917	1.56547	2284412	2286936	2525	b2190	yejO	N/A	N/A				1
52	87	124.915	119.444	0.956197	2288522	2289169	648	b2193	narP	16130130	NP_416697.1		Cytoplasmic	CPR	1
41	136	60.6098	114.903	1.89577	2289380	2290432	1053	b2194	ccmH	16130131	NP_416698.1	multipass		MPR	0
26	60	72.5315	95.6613	1.31889	2290429	2290986	558	b2195	ccmG	16130132	NP_416699.1				0
139	377	111.303	172.53	1.55009	2290983	2292926	1944	b2196	ccmF	16130133	NP_416700.1	multipass		MPR	0
105	224	340.515	415.17	1.21924	2292923	2293402	480	b2197	ccmE	16130134	NP_416701.1		Cytoplasmic	CPR	0
48	98	355.803	415.17	1.16685	2293399	2293608	210	b2198	ccmD	16130135	NP_416702.1				0
122	367	257.33	442.414	1.71925	2293605	2294342	738	b2199	ccmC	16130136	NP_416703.1	multipass		MPR	0
88	148	206.613	198.595	0.961193	2294384	2295046	663	b2200	ccmB	16130137	NP_416704.1	multipass		MPR	0
225	450	561.288	641.575	1.14304	2295043	2295666	624	b2201	ccmA	90111402	NP_416705.2				0
215	386	555.02	569.494	1.02608	2295679	2296281	603	b2202	napC	16130139	NP_416706.1				0
173	197	598.441	389.469	0.650806	2296291	2296740	450	b2203	napB	90111403	NP_416707.4		Secreted		0
439	1192	790.931	1227.39	1.55183	2296737	2297600	864	b2204	napH	16130141	NP_416708.1	multipass		MPR	0
355	673	793.975	860.251	1.08347	2297587	2298282	696	b2205	napG	16130142	NP_416709.1		Cytoplasmic	CPR	0
1543	2228	965.779	797.001	0.825241	2298289	2300775	2487	b2206	napA	16130143	NP_416710.1		Secreted		0
76	67	448.123	225.782	0.50384	2300772	2301035	264	b2207	napD	16130144	NP_416711.1		Cytoplasmic	CPR	0
210	602	660.392	1081.96	1.63836	2301025	2301519	495	b2208	napF	16130145	NP_416712.1		Cytoplasmic	CPR	0
103	121	327.881	220.138	0.671398	2301927	2302415	489	b2209	eco	16130146	NP_416713.1		Secreted		1
20	80	18.9027	43.2131	2.28608	2303130	2304776	1647	b2210	mqo	16130147	NP_416714.1				1
49	44	71.62	36.7555	0.513202	2307363	2308427	1065	b2213	ada	16130150	NP_416717.1		Cytoplasmic	CPR	0
9441	10178	13311.8	8201.87	0.616135	2309668	2310771	1104	b2215	ompC	16130152	NP_416719.1		Secreted		1
220	424	128.118	141.119	1.10148	2311510	2314182	2673	b2216	rcsD	16130153	NP_416720.1	multipass		MPR	1
202	402	483.012	549.369	1.13738	2314199	2314849	651	b2217	rcsB	16130154	NP_416721.1		Cytoplasmic	CPR	1
96	225	52.4341	70.2356	1.3395	2315049	2317898	2850	b2218	rcsC	145698285	NP_416722.2	multipass		MPR	1
113	113	96.2781	55.0249	0.57152	2318065	2319891	1827	b2219	atoS	16130156	NP_416723.1	multipass		MPR	0
97	117	108.942	75.1004	0.68936	2319888	2321273	1386	b2220	atoC	16130157	NP_416724.1		Cytoplasmic	CPR	0
18	38	6.08458	7.34131	1.20654	2327820	2332424	4605	b4500	N/A	N/A	N/A				0
9	44	8.2947	23.1762	2.7941	2332978	2334666	1689	b2230	yfaA	90111405	NP_416733.4				0
600	967	355.397	327.356	0.9211	2334815	2337442	2628	b2231	gyrA	16130166	NP_416734.1		Cytoplasmic	CPR	1
59	121	127.029	148.89	1.1721	2337589	2338311	723	b2232	ubiG	16130167	NP_416735.1		Cytoplasmic	CPR	1
77	104	31.9374	24.6532	0.771924	2338439	2342191	3753	b2233	yfaL	16130168	NP_416736.1		Secreted		1
136	181	92.6084	70.4404	0.760626	2342887	2345172	2286	b2234	nrdA	16130169	NP_416737.1		Cytoplasmic	CPR	0
64	73	88.0856	57.4222	0.65189	2345406	2346536	1131	b2235	nrdB	16130170	NP_416738.1		Cytoplasmic	CPR	0
36	161	86.0814	220.021	2.55597	2346844	2347494	651	b2237	inaA	16130172	NP_416740.1		Cytoplasmic	CPR	1
55	141	79.4941	116.472	1.46517	2347957	2349033	1077	b2239	glpQ	16130174	NP_416742.1		Secreted		0
43	124	49.2535	81.1749	1.64811	2349038	2350396	1359	b2240	glpT	16130175	NP_416743.1	multipass		MPR	0
48	55	45.8678	30.0373	0.654867	2350669	2352297	1629	b2241	glpA	16130176	NP_416744.1				0
7	11	9.14901	8.21675	0.898103	2353543	2354733	1191	b2243	glpC	16130178	NP_416746.1				0
5	20	6.03348	13.793	2.28608	2356885	2358174	1290	b2246	yfaV	90111406	NP_416749.4				0
19	21	24.5242	15.4914	0.63168	2358231	2359436	1206	b2247	yfaW	226524733	NP_416750.2		Cytoplasmic	CPR	0
105	170	135.866	125.72	0.925319	2360453	2361655	1203	b2249	yfaY	16130184	NP_416752.1				1
15	40	43.0011	65.5359	1.52405	2361755	2362297	543	b2250	yfaZ	90111407	NP_416753.4				1
32	69	25.1197	30.9561	1.23234	2366061	2368043	1983	b2255	arnA	16130190	NP_416758.1		Cytoplasmic	CPR	0
59	208	237.317	478.158	2.01485	2370914	2371300	387	b2258	arnF	90111409	NP_416761.4	multipass		MPR	0
62	323	361.467	1076.24	2.97744	2371294	2371560	267	b2259	pmrD	90111410	NP_416762.2				1
72	187	82.6534	122.688	1.48437	2371670	2373025	1356	b2260	menE	16130195	NP_416763.1		Cytoplasmic	CPR	0
148	196	239.234	181.071	0.756878	2373022	2373984	963	b2261	menC	16130196	NP_416764.1		Cytoplasmic	CPR	0
99	100	179.612	103.689	0.577293	2373984	2374841	858	b2262	menB	16130197	NP_416765.1		Cytoplasmic	CPR	0
88	153	180.48	179.337	0.993666	2374856	2375614	759	b2263	menH	16130198	NP_416766.1				0
135	172	125.761	91.5738	0.728159	2375611	2377281	1671	b2264	menD	16130199	NP_416767.1				0
73	172	87.681	118.071	1.3466	2377370	2378665	1296	b2265	menF	90111411	NP_416768.4		Cytoplasmic	CPR	0
167	285	849.538	828.596	0.975349	2378744	2379049	306	b2266	elaB	16130201	NP_416769.1				1
47	100	158.359	192.565	1.216	2379104	2379565	462	b2267	elaA	16130202	NP_416770.1		Cytoplasmic	CPR	1
16	27	27.131	26.1662	0.964441	2379630	2380547	918	b2268	rbn	90111412	NP_416771.4		Cytoplasmic	CPR	1
515	1806	549.841	1101.99	2.00421	2388070	2389527	1458	b2276	nuoN	145698289	NP_416779.2	multipass		MPR	0
563	1209	572.802	702.998	1.2273	2389534	2391063	1530	b2277	nuoM	16130212	NP_416780.1	multipass		MPR	0
897	2321	758.037	1121	1.47882	2391227	2393068	1842	b2278	nuoL	16130213	NP_416781.1	multipass		MPR	0
154	268	791.163	786.886	0.994594	2393065	2393367	303	b2279	nuoK	16130214	NP_416782.1	multipass		MPR	0
297	709	833.012	1136.51	1.36434	2393364	2393918	555	b2280	nuoJ	16130215	NP_416783.1	multipass		MPR	0
228	367	653.616	601.292	0.919947	2393930	2394472	543	b2281	nuoI	16130216	NP_416784.1		Cytoplasmic	CPR	0
374	1434	595.279	1304.46	2.19134	2394487	2395464	978	b2282	nuoH	16130217	NP_416785.1	multipass		MPR	0
1091	1275	622.769	415.953	0.667909	2395461	2398187	2727	b2283	nuoG	145698290	NP_416786.4		Cytoplasmic	CPR	0
547	580	636.384	385.648	0.606	2398240	2399577	1338	b2284	nuoF	16130219	NP_416787.1		Cytoplasmic	CPR	0
255	284	792.301	504.313	0.636517	2399574	2400074	501	b2285	nuoE	16130220	NP_416788.1		Cytoplasmic	CPR	0
579	705	503.235	350.197	0.695893	2400077	2401867	1791	b2286	nuoC	145698291	NP_416789.2		Cytoplasmic	CPR	0
224	694	525.923	931.248	1.77069	2401973	2402635	663	b2287	nuoB	16130222	NP_416790.1				0
356	1630	1248.12	3266.06	2.61679	2402651	2403094	444	b2288	nuoA	49176207	NP_416791.3	multipass		MPR	0
148	327	245.349	309.814	1.26275	2403725	2404663	939	b2289	lrhA	16130224	NP_416792.1				1
147	246	187.87	179.683	0.956422	2405583	2406800	1218	b2290	alaA	16130225	NP_416793.1		Cytoplasmic	CPR	1
42	160	108.965	237.24	2.17722	2406884	2407483	600	b2291	yfbR	16130226	NP_416794.1		Cytoplasmic	CPR	1
451	2750	383.003	1334.72	3.48488	2407542	2409374	1833	b2292	yfbS	16130227	NP_416795.1	multipass		MPR	1
173	527	413.669	720.193	1.74099	2409461	2410111	651	b2293	yfbT	90111414	NP_416796.2		Cytoplasmic	CPR	0
85	145	267.302	260.605	0.974946	2410122	2410616	495	b2294	yfbU	90111415	NP_416797.2		Cytoplasmic	CPR	0
34	123	116.065	239.971	2.06756	2410699	2411154	456	b2295	yfbV	16130230	NP_416798.1	multipass		MPR	1
519	772	671.567	570.914	0.850123	2411492	2412694	1203	b2296	ackA	16130231	NP_416799.1		Cytoplasmic	CPR	0
394	319	285.928	132.307	0.462728	2412769	2414913	2145	b2297	pta	16130232	NP_416800.1		Cytoplasmic	CPR	0
14	62	14.328	36.2645	2.53102	2415103	2416623	1521	b2298	yfcC	90111416	NP_416801.2	multipass		MPR	1
41	115	117.536	188.416	1.60304	2416656	2417198	543	b2299	yfcD	16130234	NP_416802.1		Cytoplasmic	CPR	1
58	114	162.676	182.739	1.12333	2417256	2417810	555	b2300	yfcE	49176208	NP_416803.3				1
239	419	416.148	416.961	1.00195	2419730	2420623	894	b2304	yfcH	16130239	NP_416807.1		Cytoplasmic	CPR	0
24	64	41.9297	63.9031	1.52405	2420671	2421561	891	b2305	yfcI	16130240	NP_416808.1		Cytoplasmic	CPR	1
11	63	24.9243	81.5837	3.27325	2423252	2423938	687	b2308	hisQ	16130243	NP_416811.1	multipass		MPR	0
57	76	113.318	86.3518	0.762027	2424028	2424810	783	b2309	hisJ	16130244	NP_416812.1		Secreted		0
12	28	23.8565	31.8138	1.33355	2425031	2425813	783	b2310	argT	16130245	NP_416813.1		Secreted		0
39	116	39.9927	67.9838	1.69991	2426743	2428260	1518	b2312	purF	16130247	NP_416815.1		Cytoplasmic	CPR	0
38	208	120.966	378.42	3.12832	2428297	2428785	489	b2313	cvpA	16130248	NP_416816.1	multipass		MPR	0
117	267	274.701	358.276	1.30424	2429044	2429706	663	b2314	dedD	90111417	NP_416817.2				0
94	159	115.307	111.469	0.966721	2429696	2430964	1269	b2315	folC	16130250	NP_416818.1		Cytoplasmic	CPR	0
170	420	289.211	408.364	1.41199	2431034	2431948	915	b2316	accD	16130251	NP_416819.1		Cytoplasmic	CPR	1
45	119	106.134	160.407	1.51135	2432104	2432763	660	b2317	dedA	16130252	NP_416820.1	multipass		MPR	0
57	202	109.137	221.045	2.02539	2432846	2433658	813	b2318	truA	16130253	NP_416821.1				0
62	99	95.1791	86.8594	0.912589	2433658	2434671	1014	b2319	usg	16130254	NP_416822.1		Cytoplasmic	CPR	0
89	263	121.848	205.785	1.68887	2434737	2435873	1137	b2320	pdxB	16130255	NP_416823.1		Cytoplasmic	CPR	0
19	29	29.6949	25.9035	0.872321	2435972	2436967	996	b2321	flk	16130256	NP_416824.1				1
10	29	13.203	21.8828	1.65741	2436964	2438142	1179	b2322	yfcJ	16130257	NP_416825.1	multipass		MPR	1
1218	1076	1552.81	784	0.50489	2438407	2439627	1221	b2323	fabB	16130258	NP_416826.1		Cytoplasmic	CPR	1
83	145	64.3752	64.2747	0.998439	2439786	2441792	2007	b2324	mnmC	90111418	NP_416827.4		Cytoplasmic	CPR	1
25	34	139.484	108.416	0.777268	2441913	2442191	279	b2325	yfcL	16130260	NP_416828.1				0
52	73	147.441	118.296	0.802327	2442225	2442773	549	b2326	epmC	16130261	NP_416829.1		Cytoplasmic	CPR	0
51	83	98.0106	91.1617	0.930121	2442773	2443582	810	b2327	yfcA	16130262	NP_416830.1	multipass		MPR	0
26	40	49.0577	43.1346	0.879262	2443582	2444406	825	b2328	mepA	16130263	NP_416831.1		Secreted		0
97	118	139.037	96.6655	0.695252	2444410	2445495	1086	b2329	aroC	16130264	NP_416832.1		Cytoplasmic	CPR	0
59	43	98.4369	41.0021	0.416532	2445530	2446462	933	b2330	prmB	90111419	NP_416833.4		Cytoplasmic	CPR	0
61	121	172.02	195.014	1.13367	2446628	2447179	552	b2331	smrB	16130266	NP_416834.1		Cytoplasmic	CPR	1
48	146	90.8986	158.016	1.73837	2447250	2448071	822	b2332	yfcO	90111420	NP_416835.2		Secreted		0
35	136	20.5905	45.7266	2.22076	2450378	2453023	2646	b4661	N/A	N/A	N/A				0
54	250	172.96	457.639	2.64593	2454349	2454834	486	b2340	sixA	16130273	NP_416842.1				1
105	423	76.1991	175.442	2.30241	2455037	2457181	2145	b2341	fadJ	16130274	NP_416843.1		Cytoplasmic	CPR	0
157	400	186.417	271.442	1.4561	2457181	2458491	1311	b2342	fadI	16130275	NP_416844.1		Cytoplasmic	CPR	0
610	1054	3331.75	3290.15	0.987512	2458672	2458956	285	b2343	yfcZ	90111421	NP_416845.2				1
37	71	42.9498	47.103	1.0967	2459328	2460668	1341	b2344	fadL	145698292	NP_416846.2		Secreted		1
61	201	125.602	236.534	1.88321	2462274	2463029	756	b2346	mlaA	16130279	NP_416848.1		Secreted		1
16	36	26.6948	34.3273	1.28592	2463323	2464255	933	b2347	yfdC	16130280	NP_416849.1	multipass		MPR	1
69	170	10.5147	14.8057	1.40809	2464407	2474621	10215	N/A	N/A	N/A	N/A				1
35	55	40.995	36.8177	0.898103	2477224	2478552	1329	b2366	dsdA	16130298	NP_416867.1				0
37	91	93.6514	131.639	1.40563	2481777	2482391	615	b2369	evgA	16130301	NP_416870.1		Cytoplasmic	CPR	0
41	83	17.758	20.5456	1.15698	2482396	2485989	3594	b2370	evgS	16130302	NP_416871.1	multipass		MPR	0
99	732	634.186	2679.93	4.22579	2493072	2493314	243	b2377	yfdY	16130309	NP_416878.1	multipass		MPR	1
250	504	422.54	486.845	1.15218	2493667	2494587	921	b2378	lpxP	90111426	NP_416879.4				1
83	146	104.278	104.834	1.00532	2495079	2496317	1239	b2379	alaC	16130311	NP_416880.1		Cytoplasmic	CPR	1
72	169	66.0059	88.5459	1.34149	2496693	2498390	1698	b2380	ypdA	16130312	NP_416881.1	multipass		MPR	0
28	68	59.3005	82.3078	1.38798	2498405	2499139	735	b2381	ypdB	16130313	NP_416882.1		Cytoplasmic	CPR	0
29	120	52.6136	124.427	2.36491	2499152	2500009	858	b2382	ypdC	16130314	NP_416883.1		Cytoplasmic	CPR	0
243	673	391.577	619.808	1.58285	2506483	2507448	966	b2388	glk	16130320	NP_416889.1		Cytoplasmic	CPR	1
30	64	37.1513	45.2964	1.21924	2507652	2508908	1257	b2389	yfeO	16130321	NP_416890.1	multipass		MPR	1
18	43	85.6865	116.988	1.3653	2509023	2509349	327	b2390	ypeC	16130322	NP_416891.1				1
41	195	51.511	140.018	2.71821	2509490	2510728	1239	b2392	mntH	16130324	NP_416893.1	multipass		MPR	1
28	148	19.9022	60.1225	3.02089	2513665	2515854	2190	b2395	yfeA	90111428	NP_416896.4				1
100	157	451.2	404.855	0.897287	2516489	2516833	345	b2398	yfeC	90111429	NP_416897.2				0
63	234	249.537	529.716	2.12279	2516835	2517227	393	b2399	yfeD	226524736	NP_416898.3		Cytoplasmic	CPR	0
188	208	206.672	130.683	0.63232	2517279	2518694	1416	b2400	gltX	16130330	NP_416899.1		Cytoplasmic	CPR	1
14	120	17.3373	84.9308	4.89875	2520751	2522007	1257	b2406	xapB	16130332	NP_416901.1	multipass		MPR	0
42	188	65.4443	167.422	2.55823	2524968	2525966	999	b2410	yfeH	16130336	NP_416905.1				1
12	35	85.2952	142.182	1.66693	2525963	2526181	219	b4546	ypeB	94541121	YP_588464.1				0
101	244	77.9863	107.676	1.3807	2526183	2528198	2016	b2411	ligA	16130337	NP_416906.1		Cytoplasmic	CPR	0
405	888	638.742	800.415	1.25311	2528269	2529255	987	b2412	zipA	16130338	NP_416907.1				1
16	81	32.6853	94.5691	2.89332	2529485	2530246	762	b2413	cysZ	16130339	NP_416908.1	multipass		MPR	1
195	276	312.289	252.617	0.808921	2530431	2531402	972	b2414	cysK	16130340	NP_416909.1		Cytoplasmic	CPR	1
102	90	615.415	310.343	0.504283	2531786	2532043	258	b2415	ptsH	16130341	NP_416910.1		Cytoplasmic	CPR	0
1186	1908	1068.39	982.322	0.919444	2532088	2533815	1728	b2416	ptsI	16130342	NP_416911.1		Cytoplasmic	CPR	0
461	857	1407.08	1494.96	1.06246	2533856	2534365	510	b2417	crr	16130343	NP_416912.1		Cytoplasmic	CPR	0
52	62	95.0061	64.7398	0.681428	2534408	2535259	852	b2418	pdxK	16130344	NP_416913.1		Cytoplasmic	CPR	1
8	26	16.943	31.4706	1.85744	2535771	2536505	735	b2420	yfeS	16130346	NP_416915.1		Cytoplasmic	CPR	0
35	62	59.7394	60.4806	1.01241	2536694	2537605	912	b2421	cysM	16130347	NP_416916.1		Cytoplasmic	CPR	0
20	36	28.3541	29.1689	1.02874	2537739	2538836	1098	b2422	cysA	16130348	NP_416917.1				0
1049	1182	2061.76	1327.74	0.643982	2541854	2542645	792	b2426	ucpA	90111431	NP_416921.4		Cytoplasmic	CPR	1
10	26	18.1426	26.9591	1.48595	2542774	2543631	858	b2427	murR	16130352	NP_416922.1		Cytoplasmic	CPR	1
34	67	59.003	66.451	1.12623	2543795	2544691	897	b2428	murQ	16130353	NP_416923.1		Cytoplasmic	CPR	0
57	135	62.2655	84.2827	1.3536	2544695	2546119	1425	b2429	murP	16130354	NP_416924.1	multipass		MPR	0
43	62	51.2915	42.2669	0.824053	2546124	2547428	1305	b2430	yfeW	90111432	NP_416925.2				0
432	567	747.186	560.48	0.75012	2547668	2548567	900	b2431	yfeX	90111433	NP_416926.4		Cytoplasmic	CPR	1
42	88	113.505	135.919	1.19747	2548663	2549238	576	b2432	yfeY	16130357	NP_416927.1				1
27	94	98.6602	196.308	1.98974	2549735	2550160	426	b2434	ypeA	90111435	NP_416929.4		Cytoplasmic	CPR	0
80	177	143.139	180.998	1.26449	2550374	2551243	870	b2435	amiA	16130360	NP_416930.1				0
48	117	83.0207	115.655	1.39308	2551247	2552146	900	b2436	hemF	16130361	NP_416931.1		Cytoplasmic	CPR	0
20	40	29.5658	33.7949	1.14304	2552152	2553204	1053	b2437	eutR	16130362	NP_416932.1		Cytoplasmic	CPR	0
16	28	49.713	49.721	1.00016	2553250	2553750	501	b2438	eutK	90111436	NP_416933.4				0
26	28	61.3221	37.7427	0.615483	2553763	2554422	660	b2439	eutL	16130364	NP_416934.1				0
45	88	78.8837	88.1636	1.11764	2554432	2555319	888	b2440	eutC	16130365	NP_416935.1		Cytoplasmic	CPR	0
172	716	196.58	467.687	2.37912	2555340	2556701	1362	b2441	eutB	90111437	NP_416936.4				0
161	346	37.0573	45.5152	1.22824	2556721	2563483	6763	N/A	N/A	N/A	N/A				1
7	10	37.0628	30.2602	0.816458	2570179	2570472	294	b2457	eutM	90111439	NP_416952.2				0
678	939	462.895	366.396	0.79153	2574120	2576399	2280	b2463	maeB	16130388	NP_416958.1		Cytoplasmic	CPR	1
66	95	108.032	88.8715	0.822643	2576688	2577638	951	b2464	talA	16130389	NP_416959.1		Cytoplasmic	CPR	0
122	232	94.7654	102.993	1.08683	2577658	2579661	2004	b2465	tktB	16130390	NP_416960.1		Cytoplasmic	CPR	0
18	68	26.8386	57.9466	2.15908	2579756	2580799	1044	b2466	ypfG	16130391	NP_416961.1				1
23	61	62.1574	94.2165	1.51577	2580925	2581500	576	b2467	nudK	16130392	NP_416962.1		Cytoplasmic	CPR	1
138	214	108.493	96.1541	0.886271	2581568	2583547	1980	b2468	aegA	16130393	NP_416963.1		Cytoplasmic	CPR	1
63	122	57.6533	63.808	1.10675	2583753	2585453	1701	b2469	narQ	16130394	NP_416964.1	multipass		MPR	1
56	114	27.9935	32.5691	1.16345	2585617	2588730	3114	b2470	acrD	16130395	NP_416965.1	multipass		MPR	1
125	99	3243	1467.92	0.452644	2588829	2588888	60	b4606	ypfM	145698299	YP_001165325.1				1
171	470	235.98	370.688	1.57085	2589629	2590756	1128	b2472	dapE	16130397	NP_416967.1		Cytoplasmic	CPR	0
37	107	286.545	473.595	1.65278	2590784	2590984	201	b4547	ypfN	94541122	YP_588465.1				0
77	176	171.475	224.004	1.30633	2591094	2591792	699	b2473	ypfH	90111441	NP_416968.2				1
81	221	62.5435	97.5262	1.55933	2591866	2593881	2016	b2474	tmcA	16130399	NP_416969.1				0
93	209	167.555	215.205	1.28438	2593896	2594759	864	b2475	ypfJ	16130400	NP_416970.1				0
50	67	109.008	83.4826	0.765837	2594927	2595640	714	b2476	purC	16130401	NP_416971.1		Cytoplasmic	CPR	1
278	836	418.112	718.597	1.71867	2595853	2596887	1035	b2477	bamC	90111442	NP_416972.4		Secreted		0
544	1106	963.38	1119.4	1.16195	2596904	2597782	879	b2478	dapA	16130403	NP_416973.1		Cytoplasmic	CPR	0
66	135	179.299	209.604	1.16902	2597928	2598500	573	b2479	gcvR	90111443	NP_416974.4		Cytoplasmic	CPR	1
67	154	221.433	290.884	1.31364	2598500	2598970	471	b2480	bcp	16130405	NP_416975.1		Cytoplasmic	CPR	1
28	77	26.1306	41.069	1.57168	2606509	2608176	1668	b2487	hyfG	16130412	NP_416982.1		Cytoplasmic	CPR	0
62	167	90.8772	139.898	1.53942	2612842	2613903	1062	b2493	yfgO	16130418	NP_416988.1				1
121	199	128.657	120.929	0.939938	2614116	2615579	1464	b2494	yfgC	16130419	NP_416989.1				0
27	31	116.748	76.6088	0.65619	2615600	2615959	360	b2495	yfgD	16130420	NP_416990.1		Cytoplasmic	CPR	0
58	233	128.611	295.283	2.29594	2616097	2616798	702	b2496	hda	226524737	NP_416991.2		Cytoplasmic	CPR	1
16	57	19.3071	39.3101	2.03604	2616893	2618182	1290	b2497	uraA	16130422	NP_416992.1	multipass		MPR	0
43	114	106.755	161.755	1.51519	2618268	2618894	627	b2498	upp	90111448	NP_416993.2		Cytoplasmic	CPR	0
52	170	77.9819	145.704	1.86843	2619219	2620256	1038	b2499	purM	16130424	NP_416994.1		Cytoplasmic	CPR	0
21	29	51.1571	40.3754	0.789242	2620256	2620894	639	b2500	purN	16130425	NP_416995.1		Cytoplasmic	CPR	0
204	351	153.63	151.073	0.983351	2621066	2623132	2067	b2501	ppk	16130426	NP_416996.1				0
137	267	138.301	154.045	1.11384	2623137	2624678	1542	b2502	ppx	16130427	NP_416997.1		Cytoplasmic	CPR	0
227	343	223.927	193.378	0.863575	2628980	2630557	1578	b2507	guaA	16130432	NP_417002.1		Cytoplasmic	CPR	0
99	160	105.049	97.0307	0.923669	2630626	2632092	1467	b2508	guaB	16130433	NP_417003.1		Cytoplasmic	CPR	0
141	297	160.092	192.725	1.20384	2632254	2633624	1371	b2509	xseA	16130434	NP_417004.1		Cytoplasmic	CPR	1
4	24	28.8266	98.85	3.42912	2633621	2633836	216	b2510	yfgJ	90111449	NP_417005.2				1
120	211	126.814	127.438	1.00492	2633906	2635378	1473	b2511	der	90111450	NP_417006.2		Cytoplasmic	CPR	0
225	442	297.068	333.525	1.12272	2635496	2636674	1179	b2512	bamB	16130437	NP_417007.1		Secreted		0
204	362	511.359	518.605	1.01417	2636685	2637305	621	b2513	yfgM	16130438	NP_417008.1		Secreted		1
383	672	467.602	468.898	1.00277	2637323	2638597	1275	b2514	hisS	16130439	NP_417009.1		Cytoplasmic	CPR	1
311	715	432.631	568.454	1.31395	2638708	2639826	1119	b2515	ispG	16130440	NP_417010.1		Cytoplasmic	CPR	1
339	488	520.415	428.155	0.82272	2639853	2640866	1014	b2516	rodZ	16130441	NP_417011.1				1
45	93	60.6482	71.6342	1.18114	2641151	2642305	1155	b2517	rlmN	16130442	NP_417012.1		Cytoplasmic	CPR	1
12	37	43.24	76.1969	1.76219	2642455	2642886	432	b2518	ndk	16130443	NP_417013.1		Cytoplasmic	CPR	1
57	129	38.3607	49.6173	1.29344	2643035	2645347	2313	b2519	pbpC	16130444	NP_417014.1				0
683	1278	214.265	229.136	1.0694	2645348	2650309	4962	b2520	yfhM	16130445	NP_417015.1				0
312	805	574.079	846.535	1.4746	2650516	2651361	846	b2521	sseA	90111451	NP_417016.4				1
66	77	132.224	88.1636	0.666774	2652179	2652955	777	b2522	sseB	90111452	NP_417017.4		Cytoplasmic	CPR	1
238	295	288.536	204.398	0.708397	2653097	2654380	1284	b2523	pepB	90111453	NP_417018.4		Cytoplasmic	CPR	1
33	36	255.567	159.34	0.623477	2654558	2654758	201	b2524	iscX	16130449	NP_417019.1				0
32	26	148.251	68.842	0.46436	2654770	2655105	336	b2525	fdx	16130450	NP_417020.1		Cytoplasmic	CPR	0
123	251	103.439	120.639	1.16627	2655107	2656957	1851	b2526	hscA	16130451	NP_417021.1		Cytoplasmic	CPR	0
19	48	57.3181	82.7582	1.44384	2656974	2657489	516	b2527	hscB	16130452	NP_417022.1		Cytoplasmic	CPR	0
106	513	509.271	1408.61	2.76594	2657585	2657908	324	b2528	iscA	16130453	NP_417023.1		Cytoplasmic	CPR	0
53	73	213.183	167.815	0.787188	2657925	2658311	387	b2529	iscU	16130454	NP_417024.1		Cytoplasmic	CPR	0
92	100	117.869	73.2223	0.621218	2658339	2659553	1215	b2530	iscS	49176235	YP_026169.1		Cytoplasmic	CPR	0
54	103	171.899	187.391	1.09012	2659665	2660153	489	b2531	iscR	16130456	NP_417026.1				0
304	693	638.621	832.021	1.30284	2660605	2661345	741	b2532	trmJ	16130457	NP_417027.1		Cytoplasmic	CPR	1
53	60	102.614	66.3918	0.647004	2661464	2662267	804	b2533	suhB	16130458	NP_417028.1		Cytoplasmic	CPR	1
151	286	183.491	198.626	1.08248	2663457	2664737	1281	b2535	csiE	90111454	NP_417030.2		Cytoplasmic	CPR	1
42	103	57.3498	80.3807	1.40159	2664729	2665868	1140	b2536	hcaT	16130461	NP_417031.1	multipass		MPR	1
7	22	12.2295	21.9667	1.79621	2666028	2666918	891	b2537	hcaR	16130462	NP_417032.1		Cytoplasmic	CPR	1
11	87	12.572	56.8279	4.52021	2667054	2668415	1362	b2538	hcaE	16130463	NP_417033.1		Cytoplasmic	CPR	0
11	18	40.48	37.8575	0.935215	2671368	2671790	423	b2543	yphA	145698300	NP_417038.4	multipass		MPR	1
15	37	26.7464	37.7057	1.40975	2671838	2672710	873	b2544	yphB	16130469	NP_417039.1				0
5	21	7.32881	17.592	2.40039	2672722	2673783	1062	b2545	yphC	90111455	NP_417040.2		Cytoplasmic	CPR	0
232	350	287.99	248.308	0.862207	2682276	2683529	1254	b2551	glyA	16130476	NP_417046.1		Cytoplasmic	CPR	1
93	173	121.551	129.227	1.06315	2683857	2685047	1191	b2552	hmp	16130477	NP_417047.1		Cytoplasmic	CPR	1
28	43	128.572	112.847	0.877692	2685092	2685430	339	b2553	glnB	16130478	NP_417048.1				1
32	64	37.3127	42.6499	1.14304	2685491	2686825	1335	b2554	glrR	16130479	NP_417049.1		Cytoplasmic	CPR	1
22	35	47.9636	43.6103	0.909237	2686815	2687528	714	b2555	yfhG	16130480	NP_417050.1				1
44	122	47.9636	76.0065	1.58467	2687693	2689120	1428	b2556	glrK	90111458	NP_417051.2	multipass		MPR	1
56	116	22.4207	26.5431	1.18386	2689678	2693565	3888	b2557	purL	49176239	YP_026170.1		Cytoplasmic	CPR	1
10	56	9.99768	31.9977	3.20051	2693823	2695379	1557	b2558	mltF	171701683	NP_417053.2		Cytoplasmic	CPR	1
29	119	89.5685	210.056	2.3452	2695376	2695879	504	b2559	tadA	145698301	NP_417054.2		Cytoplasmic	CPR	0
65	208	159.09	290.955	1.82887	2695937	2696572	636	b2560	pgpC	90111459	NP_417055.4				0
29	41	118.484	95.7367	0.808012	2698640	2699020	381	b2563	acpS	16130488	NP_417058.1		Cytoplasmic	CPR	0
86	94	182.884	114.245	0.624685	2699020	2699751	732	b2564	pdxJ	16130489	NP_417059.1		Cytoplasmic	CPR	0
34	67	72.6004	81.7649	1.12623	2699763	2700491	729	b2565	recO	16130490	NP_417060.1		Cytoplasmic	CPR	0
126	143	216.486	140.419	0.64863	2700503	2701408	906	b2566	era	16130491	NP_417061.1				0
79	243	180.579	317.452	1.75797	2701405	2702085	681	b2567	rnc	16130492	NP_417062.1		Cytoplasmic	CPR	0
35	98	55.8793	89.4213	1.60026	2702357	2703331	975	b2568	lepB	16130493	NP_417063.1	multipass		MPR	0
129	169	111.559	83.5283	0.748736	2703347	2705146	1800	b2569	lepA	16130494	NP_417064.1				0
82	177	265.926	328.059	1.23365	2705344	2705823	480	b2570	rseC	16130495	NP_417065.1	multipass		MPR	0
194	272	315.557	252.858	0.801307	2705820	2706776	957	b2571	rseB	16130496	NP_417066.1		Secreted		0
620	1266	1482.51	1730.1	1.16701	2706776	2707426	651	b2572	rseA	16130497	NP_417067.1				0
695	2684	1878.24	4145.52	2.20714	2707459	2708034	576	b2573	rpoE	16130498	NP_417068.1		Cytoplasmic	CPR	0
25	61	23.9778	33.4373	1.39451	2708442	2710064	1623	b2574	nadB	16130499	NP_417069.1		Cytoplasmic	CPR	1
23	100	48.5131	120.549	2.48487	2710049	2710786	738	b2575	yfiC	90111461	NP_417070.2				1
73	102	85.1195	67.9733	0.798563	2710918	2712252	1335	b2576	srmB	16130501	NP_417071.1		Cytoplasmic	CPR	1
22	110	38.8277	110.954	2.8576	2712461	2713342	882	b2577	yfiE	90111462	NP_417072.4		Cytoplasmic	CPR	1
15	35	39.7102	52.9554	1.33355	2713445	2714032	588	b2578	eamB	16130503	NP_417073.1	multipass		MPR	1
2876	2098	11658.6	4860.64	0.416916	2714088	2714471	384	b2579	grcA	16130504	NP_417074.1		Cytoplasmic	CPR	1
57	110	128.592	141.828	1.10293	2714776	2715465	690	b2580	ung	16130505	NP_417075.1		Cytoplasmic	CPR	1
169	218	253.441	186.844	0.737227	2715513	2716550	1038	b2581	yfiF	16130506	NP_417076.1		Cytoplasmic	CPR	1
13	40	48.1817	84.7286	1.75852	2716757	2717176	420	b2582	trxC	16130507	NP_417077.1		Cytoplasmic	CPR	1
606	1131	354.499	378.127	1.06665	2717975	2720635	2661	b2584	pka	16130509	NP_417079.1		Cytoplasmic	CPR	0
284	446	326.022	292.614	0.897528	2720749	2722104	1356	b2585	pssA	90111464	NP_417080.4		Cytoplasmic	CPR	1
57	119	273.853	326.754	1.19317	2722150	2722473	324	b2586	yfiM	145698302	NP_417081.2				1
438	1460	524.871	999.915	1.90507	2722470	2723768	1299	b2587	kgtP	16130512	NP_417082.1	multipass		MPR	1
512	787	309.634	272.01	0.878489	2729622	2732195	2574	b2592	clpB	16130513	NP_417083.1		Cytoplasmic	CPR	1
50	71	106.328	86.2912	0.811559	2732325	2733056	732	b2593	yfiH	16130514	NP_417084.1				0
66	98	104.728	88.8744	0.848621	2733053	2734033	981	b2594	rluD	16130515	NP_417085.1		Cytoplasmic	CPR	0
192	320	404.979	385.756	0.952534	2734168	2734905	738	b2595	bamD	16130516	NP_417086.1		Secreted		1
1157	3787	5266.17	9851.19	1.87065	2735176	2735517	342	b2597	raiA	16130518	NP_417088.1		Cytoplasmic	CPR	1
47	75	63.0164	57.471	0.912001	2735767	2736927	1161	b2599	pheA	16130520	NP_417090.1		Cytoplasmic	CPR	0
54	138	74.9184	109.422	1.46055	2736970	2738091	1122	b2600	tyrA	16130521	NP_417091.1		Cytoplasmic	CPR	0
37	46	53.7774	38.2109	0.710539	2738102	2739172	1071	b2601	aroF	16130522	NP_417092.1		Cytoplasmic	CPR	0
58	254	173.96	435.397	2.50286	2739897	2740415	519	b2603	yfiR	16130524	NP_417094.1				0
37	65	46.9402	47.129	1.00402	2740405	2741631	1227	b2604	yfiN	16130525	NP_417095.1	multipass		MPR	0
338	511	1511.91	1306.35	0.864044	2742205	2742552	348	b2606	rplS	16130527	NP_417097.1		Cytoplasmic	CPR	0
954	1065	1933.64	1233.69	0.638018	2742594	2743361	768	b2607	trmD	16130528	NP_417098.1		Cytoplasmic	CPR	0
497	987	1409.2	1599.43	1.13499	2743392	2743940	549	b2608	rimM	90111466	NP_417099.4		Cytoplasmic	CPR	0
210	94	1312.83	335.852	0.255823	2743959	2744207	249	b2609	rpsP	16130530	NP_417100.1		Cytoplasmic	CPR	0
527	790	602.312	516.023	0.856738	2744456	2745817	1362	b2610	ffh	16130531	NP_417101.1				1
37	120	44.7518	82.9511	1.85358	2746796	2748082	1287	b4461	yfjD	145698304	YP_026171.3	multipass		MPR	1
166	430	435.02	644.023	1.48044	2748137	2748730	594	b2614	grpE	16130533	NP_417104.1		Cytoplasmic	CPR	1
48	89	85.0041	90.0784	1.05969	2748853	2749731	879	b2615	nadK	16130534	NP_417105.1		Cytoplasmic	CPR	1
60	114	56.1963	61.023	1.08589	2749817	2751478	1662	b2616	recN	49176247	YP_026172.1		Cytoplasmic	CPR	1
78	106	355.023	275.74	0.776681	2751627	2751968	342	b2617	bamE	90111468	NP_417107.2		Secreted		1
34	131	181.875	400.496	2.20203	2752030	2752320	291	b2618	ratB	90111469	NP_417108.4		Cytoplasmic	CPR	0
70	318	228.437	593.1	2.59634	2752310	2752786	477	b2619	ratA	16130538	NP_417109.1				0
280	562	902.399	1035.16	1.14712	2752918	2753400	483	b2620	smpB	16130539	NP_417110.1				1
125	278	88.8492	112.933	1.27106	2759373	2761562	2190	b2627	yfjK	16130545	NP_417116.1		Cytoplasmic	CPR	0
243	406	233.929	223.375	0.954886	2761559	2763175	1617	b2628	yfjL	16130546	NP_417117.1		Cytoplasmic	CPR	0
105	321	152.185	265.901	1.74722	2763940	2765013	1074	b2630	rnlA	16130548	NP_417119.1				0
50	229	209.226	547.661	2.61756	2765006	2765377	372	b2631	rnlB	90111470	NP_417120.2				0
6	34	10.81	35.0094	3.23862	2765732	2766595	864	b2632	yfjP	49176249	YP_026173.1				0
7	21	23.2831	39.9202	1.71456	2769170	2769637	468	b2637	yfjT	16130554	NP_417125.1				0
108	139	7.63127	5.61332	0.735568	2753979	2776008	22030	N/A	N/A	N/A	N/A				1
44	142	14.9513	27.577	1.84445	2776168	2780748	4581	b2647	ypjA	90111474	NP_417134.2				1
23	21	28.2133	14.7223	0.521823	2788004	2789272	1269	b2660	lhgO	90111477	NP_417146.2		Cytoplasmic	CPR	0
32	25	34.3771	15.3494	0.4465	2789295	2790743	1449	b2661	gabD	16130575	NP_417147.1		Cytoplasmic	CPR	0
21	55	25.5187	38.1973	1.49684	2790757	2792037	1281	b2662	gabT	16130576	NP_417148.1		Cytoplasmic	CPR	0
5	18	5.55545	11.4302	2.05747	2792275	2793675	1401	b2663	gabP	16130577	NP_417149.1	multipass		MPR	0
34	56	79.8276	75.1439	0.941328	2793696	2794358	663	b2664	csiR	90111478	NP_417150.4		Cytoplasmic	CPR	1
210	389	726.431	769.053	1.05867	2794359	2794808	450	b2665	ygaU	16130579	NP_417151.1				1
16	14	156.643	78.334	0.50008	2794892	2795050	159	b2666	yqaE	16130580	NP_417152.1	multipass		MPR	1
8	16	23.7202	27.1132	1.14304	2795542	2796066	525	b2668	ygaP	16130582	NP_417154.1	multipass		MPR	0
50	326	172.96	644.502	3.72631	2797186	2797635	450	b2670	alaE	16130584	NP_417156.1	multipass		MPR	1
77	146	350.471	379.792	1.08366	2798156	2798497	342	b2672	ygaM	49176257	NP_417158.3				1
83	353	175.069	425.537	2.43068	2807639	2808376	738	b2682	ygaZ	16130594	NP_417167.1	multipass		MPR	0
22	80	101.923	211.822	2.07826	2808366	2808701	336	b2683	ygaH	16130595	NP_417168.1				0
78	114	228.659	190.998	0.835299	2808792	2809322	531	b2684	mprA	16130596	NP_417169.1		Cytoplasmic	CPR	0
31	78	31.3553	45.0895	1.43802	2810638	2812176	1539	b2686	emrB	16130598	NP_417171.1	multipass		MPR	0
114	194	343.908	334.481	0.972587	2812240	2812755	516	b2687	luxS	16130599	NP_417172.1		Cytoplasmic	CPR	1
234	610	233.946	348.546	1.48986	2812905	2814461	1557	b2688	gshA	16130600	NP_417173.1		Cytoplasmic	CPR	1
54	198	195.94	410.608	2.09557	2814534	2814962	429	b2689	yqaA	16130601	NP_417174.1	multipass		MPR	0
70	343	192.178	538.184	2.80045	2814959	2815525	567	b2690	yqaB	16130602	NP_417175.1		Cytoplasmic	CPR	0
167	374	1397.63	1788.87	1.27993	2816983	2817168	186	b2696	csrA	16130603	NP_417176.1				1
584	1457	345.525	492.672	1.42586	2817403	2820033	2631	b2697	alaS	16130604	NP_417177.1		Cytoplasmic	CPR	1
781	593	1144.76	496.763	0.433946	2820730	2821791	1062	b2699	recA	16130606	NP_417179.1		Cytoplasmic	CPR	1
24	47	34.4008	38.5024	1.11923	2822513	2823598	1086	b2701	mltB	16130608	NP_417181.1				1
435	484	1200.6	763.459	0.635898	2823854	2824417	564	b2702	srlA	49176260	YP_026180.1	multipass		MPR	0
793	1202	1285.85	1113.92	0.866289	2824414	2825373	960	b2703	srlE	49176261	YP_026181.1	multipass		MPR	0
190	153	795.057	365.905	0.460224	2825384	2825755	372	b2704	srlB	16130611	NP_417184.1		Cytoplasmic	CPR	0
698	784	1392.99	894.213	0.641937	2825759	2826538	780	b2705	srlD	16130612	NP_417185.1		Cytoplasmic	CPR	0
96	115	415.104	284.194	0.684634	2826643	2827002	360	b2706	gutM	16130613	NP_417186.1				0
165	204	331.841	234.482	0.706607	2827069	2827842	774	b2707	srlR	16130614	NP_417187.1		Cytoplasmic	CPR	0
205	286	330.342	263.395	0.797341	2827835	2828800	966	b2708	gutQ	90111480	NP_417188.4				0
65	117	66.7865	68.7057	1.02874	2828797	2830311	1515	b2709	norR	90111481	NP_417189.2		Cytoplasmic	CPR	1
108	225	74.6191	88.8466	1.19067	2833195	2835447	2253	b2712	hypF	16130619	NP_417192.1		Cytoplasmic	CPR	0
36	127	55.2653	111.426	2.0162	2836276	2837289	1014	b2714	ascG	16130621	NP_417194.1				1
16	56	17.478	34.9617	2.00032	2839012	2840436	1425	b2716	ascB	16130623	NP_417196.1		Cytoplasmic	CPR	0
49	117	161.943	220.996	1.36465	2840595	2841065	471	b2717	hycI	16130624	NP_417197.1				0
181	128	802.711	324.431	0.404169	2848669	2849019	351	b2726	hypA	16130633	NP_417206.1		Cytoplasmic	CPR	0
579	472	1032.41	481.002	0.465903	2849023	2849895	873	b2727	hypB	16130634	NP_417207.1		Cytoplasmic	CPR	0
94	110	535.985	358.467	0.6688	2849886	2850158	273	b2728	hypC	16130635	NP_417208.1				0
660	1078	915.67	854.762	0.933483	2850158	2851279	1122	b2729	hypD	16130636	NP_417209.1		Cytoplasmic	CPR	0
331	559	509.641	491.904	0.965196	2851276	2852286	1011	b2730	hypE	226524740	NP_417210.2		Cytoplasmic	CPR	0
113	156	84.608	66.7559	0.789002	2852360	2854438	2079	b2731	fhlA	16130638	NP_417211.1		Cytoplasmic	CPR	0
45	145	197.878	364.405	1.84157	2854475	2854828	354	b2732	ygbA	16130639	NP_417212.1				1
42	96	25.5187	33.3358	1.30633	2855115	2857676	2562	b2733	mutS	16130640	NP_417213.1		Cytoplasmic	CPR	1
55	179	111.478	207.353	1.86004	2858489	2859256	768	b2735	ygbI	226524741	NP_417215.2		Cytoplasmic	CPR	1
513	1930	804.185	1729.13	2.15016	2864581	2865573	993	b2741	rpoS	16130648	NP_417221.1		Cytoplasmic	CPR	0
477	1504	651.33	1173.71	1.80203	2865636	2866775	1140	b2742	nlpD	16130649	NP_417222.1		Secreted		0
125	332	310.335	471.075	1.51796	2866915	2867541	627	b2743	pcm	16130650	NP_417223.1		Cytoplasmic	CPR	0
98	227	200.198	265.027	1.32383	2867535	2868296	762	b2744	umpG	16130651	NP_417224.1				0
74	129	109.706	109.3	0.996299	2868277	2869326	1050	b2745	truD	16130652	NP_417225.1		Cytoplasmic	CPR	1
33	32	107.019	59.31	0.554202	2869323	2869802	480	b2746	ispF	16130653	NP_417226.1		Cytoplasmic	CPR	0
33	60	72.249	75.076	1.03913	2869802	2870512	711	b2747	ispD	16130654	NP_417227.1		Cytoplasmic	CPR	0
62	250	309.332	712.861	2.30452	2870531	2870842	312	b2748	ftsB	16130655	NP_417228.1				1
7	22	17.981	32.2975	1.79621	2871409	2872014	606	b2750	cysC	16130657	NP_417230.1		Cytoplasmic	CPR	0
28	67	30.5223	41.7413	1.36757	2872014	2873441	1428	b2751	cysN	16130658	NP_417231.1		Cytoplasmic	CPR	0
75	128	43.775	42.6979	0.975395	2882575	2885241	2667	b2761	cas3	16130668	NP_417241.1				1
8	15	7.26976	7.79028	1.0716	2886409	2888121	1713	b2763	cysI	16130670	NP_417243.1		Cytoplasmic	CPR	0
8	10	6.91839	4.9425	0.7144	2888121	2889920	1800	b2764	cysJ	16130671	NP_417244.1				0
140	399	171.328	279.065	1.62883	2890679	2891950	1272	b2766	ygcN	90111484	NP_417246.4		Cytoplasmic	CPR	0
20	24	119.283	81.8069	0.685824	2891941	2892201	261	b2767	ygcO	90111485	NP_417247.2				0
26	65	70.2649	100.395	1.4288	2892218	2892793	576	b2768	ygcP	16130675	NP_417248.1		Cytoplasmic	CPR	0
72	284	166.783	375.983	2.25433	2902769	2903440	672	b2777	queE	16130684	NP_417257.1		Cytoplasmic	CPR	1
1304	681	1562.63	466.399	0.29847	2904665	2905963	1299	b2779	eno	16130686	NP_417259.1		Cytoplasmic	CPR	0
474	1232	450.456	669.139	1.48547	2906051	2907688	1638	b2780	pyrG	16130687	NP_417260.1		Cytoplasmic	CPR	0
93	155	182.787	174.111	0.952534	2907916	2908707	792	b2781	mazG	16130688	NP_417261.1		Cytoplasmic	CPR	0
45	100	208.478	264.777	1.27005	2908778	2909113	336	b2782	mazF	16130689	NP_417262.1				0
35	93	218.805	332.279	1.51861	2909113	2909361	249	b2783	mazE	16130690	NP_417263.1				0
411	721	286.254	286.997	1.00259	2909439	2911673	2235	b2784	relA	16130691	NP_417264.1		Cytoplasmic	CPR	0
134	286	160.207	195.422	1.21981	2911721	2913022	1302	b2785	rlmD	16130692	NP_417265.1		Cytoplasmic	CPR	1
94	231	53.0736	74.5409	1.40448	2913079	2915835	2757	b2786	barA	16130693	NP_417266.1	multipass		MPR	1
870	1070	1009.9	709.863	0.702904	2916067	2917407	1341	b2787	gudD	16130694	NP_417267.1				0
506	860	587.367	570.544	0.971359	2917428	2918768	1341	b2788	gudX	16130695	NP_417268.1		Cytoplasmic	CPR	0
567	1349	652.338	887.02	1.35975	2918770	2920122	1353	b2789	gudP	16130696	NP_417269.1	multipass		MPR	0
86	221	297.491	436.917	1.46867	2920557	2921006	450	b2790	yqcA	16130697	NP_417270.1				0
19	23	37.7728	26.1328	0.69184	2921024	2921806	783	b2791	truC	16130698	NP_417271.1		Cytoplasmic	CPR	0
22	53	62.7217	86.358	1.37684	2922757	2923302	546	b2793	syd	16130700	NP_417273.1				1
35	54	64.1724	56.5855	0.881774	2923370	2924218	849	b2794	queF	16130701	NP_417274.1		Cytoplasmic	CPR	1
837	1083	954.51	705.855	0.739494	2924330	2925694	1365	b2795	ygdH	16130702	NP_417275.1		Cytoplasmic	CPR	1
43	59	51.8879	40.6894	0.784179	2926251	2927540	1290	b2796	sdaC	16130703	NP_417276.1	multipass		MPR	0
27	91	30.7231	59.18	1.92624	2927598	2928965	1368	b2797	sdaB	16130704	NP_417277.1		Cytoplasmic	CPR	0
17	43	35.0038	50.6018	1.44561	2929077	2929832	756	b2798	ygdG	226524743	NP_417278.4		Cytoplasmic	CPR	1
261	489	352.676	377.638	1.07078	2929887	2931038	1152	b2799	fucO	16130706	NP_417279.1				0
58	66	139.329	90.6125	0.650351	2931063	2931710	648	b2800	fucA	16130707	NP_417280.1		Cytoplasmic	CPR	0
19	45	22.4572	30.3981	1.3536	2932257	2933573	1317	b2801	fucP	16130708	NP_417281.1	multipass		MPR	0
47	41	41.1948	20.5381	0.49856	2933606	2935381	1776	b2802	fucI	16130709	NP_417282.1		Cytoplasmic	CPR	0
24	45	25.7828	27.6289	1.0716	2935460	2936908	1449	b2803	fucK	16130710	NP_417283.1		Cytoplasmic	CPR	0
26	60	95.6799	126.192	1.31889	2936910	2937332	423	b2804	fucU	16130711	NP_417284.1		Cytoplasmic	CPR	0
36	81	76.556	98.4449	1.28592	2937390	2938121	732	b2805	fucR	16130712	NP_417285.1		Cytoplasmic	CPR	0
38	134	53.7259	108.277	2.01536	2938165	2939265	1101	b2806	rlmM	16130713	NP_417286.1		Cytoplasmic	CPR	1
18	73	70.7563	164.001	2.31783	2939258	2939653	396	b2807	ygdD	16130714	NP_417287.1	multipass		MPR	1
25	78	42.3921	75.5912	1.78314	2939672	2940589	918	b2808	gcvA	16130715	NP_417288.1		Cytoplasmic	CPR	1
11	63	75.101	245.824	3.27325	2940940	2941167	228	b2809	ygdI	90111491	NP_417289.2				1
71	150	91.6429	110.653	1.20744	2941359	2942564	1206	b2810	csdA	16130717	NP_417290.1		Cytoplasmic	CPR	0
39	87	136.732	174.323	1.27493	2942564	2943007	444	b2811	csdE	16130718	NP_417291.1		Cytoplasmic	CPR	0
33	159	63.6544	175.284	2.75369	2943058	2943864	807	b2812	tcdA	16130719	NP_417292.1		Cytoplasmic	CPR	1
35	114	49.6196	92.3681	1.86152	2944103	2945200	1098	b2813	mltA	16130720	NP_417293.1		Secreted		1
18	48	21.0357	32.0595	1.52405	2947264	2948595	1332	b2818	argA	16130722	NP_417295.1		Cytoplasmic	CPR	1
33	95	28.1166	46.2599	1.64529	2948657	2950483	1827	b2819	recD	16130723	NP_417296.1		Cytoplasmic	CPR	0
110	203	48.3292	50.9735	1.05471	2950483	2954025	3543	b2820	recB	16130724	NP_417297.1		Cytoplasmic	CPR	0
66	162	35.5618	49.8869	1.40282	2954018	2956906	2889	b2821	ptrA	16130725	NP_417298.1		Secreted		0
111	238	51.2873	62.8486	1.22542	2957082	2960450	3369	b2822	recC	16130726	NP_417299.1		Cytoplasmic	CPR	0
7	19	19.32	29.9705	1.55127	2961175	2961738	564	b2825	ppdB	16130729	NP_417302.1				0
65	125	127.272	139.882	1.09908	2962383	2963177	795	b2827	thyA	16130731	NP_417304.1		Cytoplasmic	CPR	0
70	222	124.389	225.459	1.81254	2963184	2964059	876	b2828	lgt	16130732	NP_417305.1	multipass		MPR	0
345	572	239.003	226.471	0.947564	2964210	2966456	2247	b2829	ptsP	16130733	NP_417306.1		Cytoplasmic	CPR	0
319	939	935.156	1573.22	1.68231	2966469	2966999	531	b2830	rppH	16130734	NP_417307.1		Cytoplasmic	CPR	0
17	54	38.352	69.6248	1.81542	2967684	2968373	690	b2831	mutH	16130735	NP_417308.1		Cytoplasmic	CPR	1
19	82	41.4231	102.173	2.46656	2968442	2969155	714	b2832	ygdQ	16130736	NP_417309.1	multipass		MPR	1
24	79	170.59	320.924	1.88125	2969293	2969511	219	b2833	ygdR	16130737	NP_417310.1				1
115	102	171.963	87.1704	0.506914	2969619	2970659	1041	b2834	tas	16130738	NP_417311.1		Cytoplasmic	CPR	1
43	129	56.0598	96.118	1.71456	2970691	2971884	1194	b2835	lplT	16130739	NP_417312.1	multipass		MPR	0
36	88	25.944	36.245	1.39705	2971877	2974036	2160	b2836	aas	16130740	NP_417313.1	multipass		MPR	0
131	301	197.597	259.481	1.31319	2974621	2975652	1032	b2837	galR	16130741	NP_417314.1		Cytoplasmic	CPR	1
44	91	54.2297	64.0999	1.18201	2975659	2976921	1263	b2838	lysA	16130742	NP_417315.1		Cytoplasmic	CPR	1
344	825	572.098	784.147	1.37065	2977043	2977978	936	b2839	lysR	16130743	NP_417316.1		Cytoplasmic	CPR	1
1640	4043	3683.82	5190.27	1.40894	2977965	2978657	693	b2840	ygeA	16130744	NP_417317.1		Cytoplasmic	CPR	0
6530	17808	7163.39	11164.8	1.5586	2978786	2980204	1419	b2841	araE	16130745	NP_417318.1	multipass		MPR	0
53	190	108.27	221.829	2.04885	2980519	2981280	762	b2842	kduD	16130746	NP_417319.1		Cytoplasmic	CPR	1
85	320	111.941	240.853	2.15161	2982433	2983614	1182	b2844	yqeF	90111494	NP_417321.2		Cytoplasmic	CPR	1
91	228	187.373	268.307	1.43194	2997158	2997913	756	b2865	ygeR	90111503	NP_417341.4		Secreted		1
178	259	122.657	102.001	0.831594	2998367	3000625	2259	b2866	xdhA	16130768	NP_417342.1		Cytoplasmic	CPR	0
34	27	60.2113	27.3271	0.453854	3000636	3001514	879	b2867	xdhB	16130769	NP_417343.1		Cytoplasmic	CPR	0
43	64	139.449	118.62	0.850635	3001511	3001990	480	b2868	xdhC	16130770	NP_417344.1		Cytoplasmic	CPR	0
564	1152	493.504	576.097	1.16736	3002030	3003808	1779	b2869	ygeV	16130771	NP_417345.1		Cytoplasmic	CPR	1
229	192	299.303	143.42	0.479179	3004284	3005474	1191	b2870	ygeW	49176276	YP_026185.1		Cytoplasmic	CPR	1
166	228	215.875	169.457	0.78498	3005532	3006728	1197	b2871	ygeX	16130773	NP_417347.1		Cytoplasmic	CPR	1
133	143	170.819	104.967	0.614492	3006786	3007997	1212	b2872	ygeY	16130774	NP_417348.1		Cytoplasmic	CPR	1
28	55	31.4472	35.3036	1.12263	3008050	3009435	1386	b2873	hyuA	90111504	NP_417349.4		Cytoplasmic	CPR	1
31	72	51.7211	68.6547	1.3274	3009483	3010415	933	b2874	yqeA	16130776	NP_417350.1		Cytoplasmic	CPR	1
563	1083	538.984	592.553	1.09939	3010636	3012261	1626	b2875	yqeB	16130777	NP_417351.1		Cytoplasmic	CPR	1
245	574	494.652	662.334	1.33899	3012309	3013079	771	b2876	yqeC	90111505	NP_417352.2				1
52	127	139.802	195.139	1.39583	3013182	3013760	579	b2877	mocA	16130779	NP_417353.1				1
470	642	236.083	184.303	0.780672	3014082	3017180	3099	b2878	ygfK	16130780	NP_417354.1		Cytoplasmic	CPR	0
96	126	112.443	84.3461	0.75012	3017183	3018511	1329	b2879	ssnA	90111506	NP_417355.4		Cytoplasmic	CPR	0
51	78	101.78	88.965	0.87409	3018562	3019341	780	b2880	ygfM	16130782	NP_417356.1		Cytoplasmic	CPR	0
85	167	46.0865	51.7491	1.12287	3019338	3022208	2871	b2881	xdhD	16130783	NP_417357.1				0
17	68	19.3442	44.2224	2.28608	3025143	3026510	1368	b4464	ygfQ	49176279	YP_026186.1				0
25	84	20.2687	38.9222	1.92031	3027034	3028953	1920	b2887	ygfT	90111509	NP_417363.2		Cytoplasmic	CPR	0
41	97	44.0457	59.5556	1.35213	3029389	3030837	1449	b2888	uacT	90111510	NP_417364.2	multipass		MPR	1
184	292	188.683	171.132	0.906978	3031679	3033196	1518	b2890	lysS	16130792	NP_417366.1		Cytoplasmic	CPR	0
168	246	255.636	213.934	0.836869	3033206	3034228	1023	b2891	prfB	16130793	NP_417367.1		Cytoplasmic	CPR	0
129	339	115.805	173.928	1.5019	3034395	3036128	1734	b2892	recJ	16130794	NP_417368.1		Cytoplasmic	CPR	0
81	116	177.339	145.147	0.818474	3036134	3036844	711	b2893	dsbC	16130795	NP_417369.1		Secreted		0
91	367	157.92	363.993	2.30492	3036869	3037765	897	b2894	xerD	16130796	NP_417370.1		Cytoplasmic	CPR	0
89	214	265.404	364.723	1.37422	3037877	3038398	522	b2895	fldB	16130797	NP_417371.1		Cytoplasmic	CPR	1
116	312	442.574	680.321	1.53719	3038438	3038845	408	b2896	cptA	16130798	NP_417372.1	multipass		MPR	1
98	256	571.35	852.998	1.49295	3038826	3039092	267	b2897	cptB	16130799	NP_417373.1		Cytoplasmic	CPR	1
286	515	453.821	467.044	1.02914	3039335	3040315	981	b2898	ygfZ	16130800	NP_417374.1				1
654	2220	1542.49	2992.46	1.94002	3040511	3041170	660	b2899	yqfA	16130801	NP_417375.1	multipass		MPR	1
136	184	147.016	113.678	0.773233	3041684	3043123	1440	b2901	bglA	16130803	NP_417377.1		Cytoplasmic	CPR	1
27	54	56.4909	64.5714	1.14304	3043180	3043923	744	b2902	ygfF	16130804	NP_417378.1		Cytoplasmic	CPR	1
1229	1612	665.661	498.997	0.749626	3044190	3047063	2874	b2903	gcvP	16130805	NP_417379.1		Cytoplasmic	CPR	0
426	347	1700.33	791.561	0.465534	3047182	3047571	390	b2904	gcvH	16130806	NP_417380.1				0
749	893	1064.77	725.532	0.681399	3047595	3048689	1095	b2905	gcvT	16130807	NP_417381.1		Cytoplasmic	CPR	0
153	268	197.976	198.193	1.00109	3049137	3050339	1203	b2906	ubiI	16130808	NP_417382.1		Cytoplasmic	CPR	0
189	353	249.537	266.367	1.06744	3050362	3051540	1179	b2907	ubiH	16130809	NP_417383.1				0
287	331	336.919	222.077	0.65914	3051537	3052862	1326	b2908	pepP	16130810	NP_417384.1		Cytoplasmic	CPR	0
217	307	583.403	471.714	0.808556	3052888	3053466	579	b2909	ygfB	90111511	NP_417385.4		Cytoplasmic	CPR	0
209	355	985.871	957.048	0.970764	3053634	3053963	330	b2910	zapA	16130812	NP_417386.1				1
1804	224	15345.2	1088.97	0.0709648	3054005	3054187	183	b2911	ssrS	N/A	N/A				0
232	338	657.814	547.726	0.832646	3054263	3054811	549	b2912	fau	49176282	NP_417387.3				0
140	228	176.747	164.51	0.930762	3055200	3056432	1233	b2913	serA	16130814	NP_417388.1		Cytoplasmic	CPR	1
158	263	372.65	354.512	0.951328	3056688	3057347	660	b2914	rpiA	16130815	NP_417389.1				1
45	88	78.3543	87.5719	1.11764	3057775	3058668	894	b2916	argP	16130817	NP_417391.1		Cytoplasmic	CPR	1
172	357	361.325	428.617	1.18624	3065362	3066102	741	b2922	yggE	16130823	NP_417397.1		Secreted		1
32	106	78.3214	148.275	1.89316	3066195	3066830	636	b2923	argO	16130824	NP_417398.1	multipass		MPR	1
65	201	117.516	207.688	1.76732	3066969	3067829	861	b2924	mscS	16130825	NP_417399.1	multipass		MPR	1
528	515	761.023	424.231	0.557449	3068187	3069266	1080	b2925	fbaA	16130826	NP_417400.1		Cytoplasmic	CPR	0
957	1066	1279.81	814.749	0.636615	3069481	3070644	1164	b2926	pgk	16130827	NP_417401.1		Cytoplasmic	CPR	0
249	585	380.003	510.241	1.34273	3070694	3071713	1020	b2927	epd	16130828	NP_417402.1		Cytoplasmic	CPR	0
22	51	47.9636	63.5465	1.32489	3071998	3072711	714	b2928	yggC	16130829	NP_417403.1		Cytoplasmic	CPR	0
26	56	79.358	97.6871	1.23097	3072708	3073217	510	b2929	yggD	16130830	NP_417404.1				0
4136	3189	3232.06	1424.24	0.440662	3077666	3079657	1992	b2935	tktA	49176286	YP_026188.1		Cytoplasmic	CPR	1
126	301	258.414	352.813	1.3653	3079935	3080693	759	b2936	loiP	90111514	NP_417411.2				1
183	290	309.299	280.129	0.905688	3080899	3081819	921	b2937	speB	16130838	NP_417412.1		Cytoplasmic	CPR	0
195	332	153.538	149.4	0.97305	3081957	3083933	1977	b2938	speA	16130839	NP_417413.1		Secreted		0
8	52	57.6533	214.175	3.71488	3084209	3084424	216	b2940	yqgC	16130841	NP_417415.1				1
49	122	66.0392	93.9717	1.42297	3084728	3085882	1155	b2942	metK	16130843	NP_417417.1		Cytoplasmic	CPR	1
375	669	418.451	426.65	1.01959	3086306	3087700	1395	b2943	galP	16130844	NP_417418.1	multipass		MPR	1
70	118	148.859	143.414	0.96342	3089156	3089887	732	b2946	rsmE	90111515	NP_417421.4		Cytoplasmic	CPR	0
129	159	211.153	148.743	0.704432	3089900	3090850	951	b2947	gshB	16130848	NP_417422.1		Cytoplasmic	CPR	0
63	78	173.88	123.037	0.707597	3090959	3091522	564	b2948	yqgE	90111516	NP_417423.4				0
14	36	52.2612	76.8044	1.46962	3091522	3091938	417	b2949	yqgF	16130850	NP_417424.1		Cytoplasmic	CPR	0
7	24	11.1075	21.7651	1.9595	3092122	3093102	981	b2950	yggR	90111517	NP_417425.2		Cytoplasmic	CPR	1
20	42	44.16	53.0005	1.20019	3093120	3093824	705	b2951	yggS	16130852	NP_417426.1		Cytoplasmic	CPR	0
29	67	79.6164	105.126	1.32041	3093842	3094408	567	b2952	yggT	16130853	NP_417427.1	multipass		MPR	0
22	16	57.6533	23.9636	0.415651	3094703	3095296	594	b2954	rdgB	16130855	NP_417429.1		Cytoplasmic	CPR	0
37	49	50.6558	38.3403	0.756878	3095289	3096425	1137	b2955	yggW	16130856	NP_417430.1		Cytoplasmic	CPR	0
4987	5702	7414.47	4845.07	0.653461	3097704	3098750	1047	b2957	ansB	16130858	NP_417432.1		Secreted		1
65	197	140.53	243.418	1.73215	3098926	3099645	720	b2958	yggN	16130859	NP_417433.1				1
129	225	614.087	612.145	0.996838	3099829	3100155	327	b2959	yggL	90111519	NP_417434.4		Cytoplasmic	CPR	0
52	74	112.424	91.4363	0.813317	3100155	3100874	720	b2960	trmI	16130861	NP_417435.1		Cytoplasmic	CPR	0
54	93	79.8276	78.5731	0.984285	3101035	3102087	1053	b2961	mutY	16130862	NP_417436.1		Cytoplasmic	CPR	0
23	36	129.72	116.041	0.894554	3102115	3102390	276	b2962	yggX	16130863	NP_417437.1				0
18	45	25.944	37.0688	1.4288	3102455	3103534	1080	b2963	mltC	90111520	NP_417438.2				0
75	203	92.8782	143.675	1.54692	3103736	3104992	1257	b2964	nupG	90111521	NP_417439.4	multipass		MPR	0
43	127	31.3368	52.8959	1.68798	3105042	3107177	2136	b2965	speC	90111522	NP_417440.4		Cytoplasmic	CPR	1
85	438	186.885	550.377	2.94501	3107575	3108282	708	b2966	yqgA	16130867	NP_417441.1	multipass		MPR	1
37	96	59.8085	88.6879	1.48286	3109150	3110112	963	b2969	N/A	N/A	N/A				0
34	93	11.5989	18.1323	1.56328	3112572	3117134	4563	b4466	yghJ	49176293	YP_026189.1				1
824	1057	590.548	432.947	0.733127	3119656	3121827	2172	b2976	glcB	16130876	NP_417450.1		Cytoplasmic	CPR	0
227	148	872.486	325.107	0.372621	3121849	3122253	405	b2977	glcG	16130877	NP_417451.1				0
134	201	170.416	146.095	0.85728	3122258	3123481	1224	b4467	glcF	49176294	YP_026190.1				0
98	120	144.872	101.385	0.699821	3123492	3124544	1053	b4468	glcE	49176295	YP_026191.1				0
165	244	171.23	144.716	0.845157	3124544	3126043	1500	b2979	glcD	16130879	NP_417453.1		Cytoplasmic	CPR	0
22	100	44.7661	116.294	2.59782	3126294	3127058	765	b2980	glcC	16130880	NP_417454.1		Cytoplasmic	CPR	1
231	342	193.324	163.581	0.846147	3134685	3136544	1860	b2988	gss	16130888	NP_417462.1		Cytoplasmic	CPR	1
135	235	242.383	241.139	0.994869	3136749	3137615	867	b2989	yghU	90111524	NP_417463.4		Cytoplasmic	CPR	1
62	143	387.597	510.924	1.31818	3137738	3137986	249	b2990	hybG	16130890	NP_417464.1				0
68	161	309.507	418.812	1.35316	3137999	3138340	342	b2991	hybF	16130891	NP_417465.1		Cytoplasmic	CPR	0
117	246	372.447	447.554	1.20166	3138333	3138821	489	b2992	hybE	16130892	NP_417466.1				0
269	590	845.931	1060.39	1.25352	3138814	3139308	495	b2993	hybD	16130893	NP_417467.1		Cytoplasmic	CPR	0
738	1034	674.178	539.847	0.800748	3139308	3141011	1704	b2994	hybC	16130894	NP_417468.1				0
534	1432	705.042	1080.56	1.53262	3141008	3142186	1179	b2995	hybB	16130895	NP_417469.1	multipass		MPR	0
846	879	1334.26	792.303	0.593814	3142176	3143162	987	b2996	hybA	16130896	NP_417470.1				0
1066	1617	1482.91	1285.58	0.866931	3143165	3144283	1119	b2997	hybO	16130897	NP_417471.1				0
404	636	604.113	543.533	0.89972	3145919	3146959	1041	b3001	yghZ	16130899	NP_417474.1		Cytoplasmic	CPR	1
79	281	248.433	505.034	2.03288	3146999	3147493	495	b3002	yqhA	16130900	NP_417475.1	multipass		MPR	1
13	32	22.8659	32.1682	1.40682	3147684	3148568	885	b3003	yghA	16130901	NP_417476.1		Cytoplasmic	CPR	1
63	140	230.207	292.373	1.27005	3148840	3149265	426	b3005	exbD	16130903	NP_417478.1				0
155	372	328.271	450.272	1.37165	3149272	3150006	735	b3006	exbB	16130904	NP_417479.1	multipass		MPR	0
23	36	30.1369	26.9591	0.894554	3150258	3151445	1188	b3008	metC	16130906	NP_417481.1		Cytoplasmic	CPR	1
188	757	443.406	1020.4	2.30128	3151585	3152244	660	b3009	yghB	16130907	NP_417482.1	multipass		MPR	1
393	330	525.566	252.22	0.479903	3153377	3154540	1164	b3011	yqhD	16130909	NP_417484.1		Cytoplasmic	CPR	0
137	102	257.56	109.595	0.425511	3154645	3155472	828	b3012	dkgA	90111527	NP_417485.4		Cytoplasmic	CPR	0
73	150	51.1868	60.1115	1.17436	3156949	3159168	2220	b4469	ygiQ	49176302	YP_026196.1		Cytoplasmic	CPR	1
147	293	161.943	184.478	1.13915	3159279	3160691	1413	b3017	ftsP	16130913	NP_417489.1		Secreted		1
95	221	65.4629	87.0353	1.32954	3161737	3163995	2259	b3019	parC	16130915	NP_417491.1				1
84	154	81.3169	85.2028	1.04779	3164133	3165740	1608	b3020	ygiS	16130916	NP_417492.1		Secreted		1
21	34	67.6799	62.6255	0.925319	3166771	3167253	483	b3023	ygiV	49176303	YP_026197.1				1
188	97	744.651	219.583	0.29488	3167306	3167698	393	b3024	ygiW	16130920	NP_417496.1				1
13	34	14.9899	22.406	1.49475	3168506	3169855	1350	b3026	qseC	16130922	NP_417498.1	multipass		MPR	0
44	18	117.684	27.515	0.233804	3170552	3171133	582	b3028	mdaB	16130924	NP_417500.1				1
122	129	602.888	364.333	0.604312	3171164	3171478	315	b3029	ygiN	16130925	NP_417501.1		Cytoplasmic	CPR	1
223	566	183.376	266.002	1.45059	3171526	3173418	1893	b3030	parE	16130926	NP_417502.1		Cytoplasmic	CPR	0
131	306	350.377	467.754	1.335	3173447	3174028	582	b3031	yqiA	16130927	NP_417503.1		Cytoplasmic	CPR	0
365	870	686.199	934.778	1.36225	3174028	3174855	828	b3032	cpdA	16130928	NP_417504.1		Cytoplasmic	CPR	0
65	186	239.2	391.194	1.63543	3174880	3175302	423	b3033	yqiB	16130929	NP_417505.1				0
91	227	224.848	320.557	1.42566	3175303	3175932	630	b3034	nudF	16130930	NP_417506.1		Cytoplasmic	CPR	0
299	293	314.059	175.889	0.560052	3176137	3177618	1482	b3035	tolC	90111528	NP_417507.2		Secreted		0
180	105	416.957	139.008	0.333387	3177766	3178437	672	b3037	ygiB	145698308	NP_417509.3				0
250	360	335.193	275.861	0.822989	3178443	3179603	1161	b3038	ygiC	16130934	NP_417510.1		Cytoplasmic	CPR	0
29	76	57.2148	85.6951	1.49778	3179641	3180429	789	b3039	ygiD	226524747	NP_417511.2				1
119	311	239.328	357.469	1.49364	3180572	3181345	774	b3040	zupT	16130936	NP_417512.1	multipass		MPR	1
264	520	628.368	707.367	1.12572	3181835	3182488	654	b3041	ribB	16130937	NP_417513.1		Cytoplasmic	CPR	1
103	94	550.975	287.378	0.521582	3182862	3183152	291	b3042	yqiC	90111530	NP_417514.4		Cytoplasmic	CPR	1
151	288	1169.41	1274.72	1.09005	3189761	3189961	201	b3049	glgS	16130945	NP_417521.1				1
8	69	19.7668	97.4379	4.92936	3190230	3190859	630	b3050	yqiJ	16130946	NP_417522.1	multipass		MPR	0
37	79	34.6544	42.2878	1.22027	3190886	3192547	1662	b3051	yqiK	16130947	NP_417523.1				0
147	313	159.572	194.185	1.21691	3193342	3194775	1434	b3052	rfaE	16130948	NP_417524.1		Cytoplasmic	CPR	1
250	356	136.98	111.48	0.813845	3194823	3197663	2841	b3053	glnE	16130949	NP_417525.1				0
114	128	136.296	87.4618	0.641707	3197686	3198987	1302	b3054	ygiF	16130950	NP_417526.1		Cytoplasmic	CPR	0
51	82	127.84	117.474	0.918915	3199229	3199849	621	b3055	ygiM	16130951	NP_417527.1				0
193	792	242.479	568.687	2.34531	3199913	3201151	1239	b3056	cca	16130952	NP_417528.1		Cytoplasmic	CPR	0
43	245	81.43	265.163	3.25634	3201332	3202153	822	b3057	bacA	16130953	NP_417529.1				1
46	130	115.866	187.143	1.61517	3202716	3203333	618	b3059	ygiH	16130955	NP_417531.1				1
74	174	123.463	165.916	1.34385	3203346	3204278	933	b3060	ttdR	16130956	NP_417532.1		Cytoplasmic	CPR	1
44	84	67.5464	73.6989	1.09108	3207552	3208565	1014	b3064	tsaD	16130960	NP_417536.1		Secreted		1
232	364	1671.94	1499.23	0.896696	3208803	3209018	216	b3065	rpsU	16130961	NP_417537.1		Cytoplasmic	CPR	0
105	256	93.6123	130.441	1.39342	3209129	3210874	1746	b3066	dnaG	16130962	NP_417538.1		Cytoplasmic	CPR	0
243	285	205.355	137.649	0.670302	3211069	3212910	1842	b3067	rpoD	16130963	NP_417539.1		Cytoplasmic	CPR	0
47	144	144.304	252.682	1.75104	3212989	3213495	507	b3068	mug	16130964	NP_417540.1		Cytoplasmic	CPR	1
24	29	59.8707	41.3459	0.690587	3214801	3215424	624	b3071	yqjI	16130966	NP_417542.1		Cytoplasmic	CPR	1
32	86	36.096	55.442	1.53596	3217516	3218895	1380	b3073	patA	145698310	NP_417544.5		Cytoplasmic	CPR	1
40	34	186.984	90.8352	0.485792	3218937	3219269	333	b3074	ygjH	16130969	NP_417545.1		Cytoplasmic	CPR	1
158	201	249.948	181.727	0.727061	3219488	3220471	984	b3075	ebgR	16130970	NP_417546.1		Cytoplasmic	CPR	1
14	40	9.2657	15.1301	1.63292	3226910	3229261	2352	b3080	ygjK	16130975	NP_417551.1		Secreted		0
42	78	32.3818	34.3699	1.06139	3229687	3231705	2019	b3081	fadH	16130976	NP_417552.1		Cytoplasmic	CPR	1
386	568	608.776	511.977	0.840994	3235333	3236319	987	b3087	ygjR	145698311	NP_417558.2		Cytoplasmic	CPR	1
135	253	168.792	180.788	1.07107	3237966	3239210	1245	b3089	sstT	16130984	NP_417560.1	multipass		MPR	1
396	745	414.267	445.423	1.07521	3239849	3241336	1488	b3091	uxaA	16130986	NP_417562.1		Cytoplasmic	CPR	0
395	343	435.154	215.959	0.496282	3241351	3242763	1413	b3092	uxaC	16130987	NP_417563.1		Cytoplasmic	CPR	0
276	1023	302.771	641.376	2.11835	3243126	3244544	1419	b3093	exuT	16130988	NP_417564.1	multipass		MPR	1
260	387	520.883	443.108	0.850686	3244674	3245450	777	b3094	exuR	90111537	NP_417565.2		Cytoplasmic	CPR	1
110	382	258.266	512.589	1.98473	3245795	3246457	663	b3095	yqjA	16130990	NP_417566.1	multipass		MPR	0
58	246	235.117	569.932	2.42403	3246461	3246844	384	b3096	mzrA	16130991	NP_417567.1				0
134	123	565.283	296.55	0.524604	3246991	3247359	369	b3097	yqjC	90111538	NP_417568.2				0
214	208	1088.63	604.73	0.555496	3247397	3247702	306	b3098	yqjD	16130993	NP_417569.1				0
186	217	714.901	476.677	0.666774	3247705	3248109	405	b3099	yqjE	16130994	NP_417570.1	multipass		MPR	0
101	86	524.068	255.033	0.486641	3248099	3248398	300	b3100	yqjK	16130995	NP_417571.1				0
106	332	450.83	807.005	1.79004	3250326	3250691	366	b3103	yhaH	16130998	NP_417574.1	multipass		MPR	1
36	68	62.4738	67.4428	1.07954	3251340	3252236	897	b3105	yhaJ	16131000	NP_417576.1		Cytoplasmic	CPR	1
8	9	75.4734	48.5264	0.64296	3253065	3253229	165	b3107	yhaL	90111540	NP_417578.2				0
45	75	53.4315	50.8953	0.952534	3253363	3254673	1311	b4470	yhaM	49176312	YP_026202.1		Cytoplasmic	CPR	0
40	115	46.7459	76.8092	1.64312	3254701	3256032	1332	b3110	yhaO	145698312	YP_026203.3	multipass		MPR	0
873	2170	995.564	1414.32	1.42062	3256307	3257671	1365	b4471	tdcG	49176314	YP_026204.1		Cytoplasmic	CPR	0
372	563	1484.79	1284.29	0.864962	3257743	3258132	390	b3113	tdcF	90111542	NP_417583.4		Cytoplasmic	CPR	0
2308	2797	1565.46	1084.25	0.692609	3258146	3260440	2295	b3114	tdcE	49176316	YP_026205.1		Cytoplasmic	CPR	0
1555	4935	2002.13	3631.45	1.8138	3260474	3261682	1209	b3115	tdcD	145698313	NP_417585.2		Cytoplasmic	CPR	0
2692	9889	3146	6604.92	2.09947	3261708	3263039	1332	b3116	tdcC	16131009	NP_417586.1	multipass		MPR	0
3288	8337	5169.93	7491.93	1.44914	3263061	3264050	990	b3117	tdcB	16131010	NP_417587.1		Cytoplasmic	CPR	0
1014	4834	1680.97	4579.95	2.72459	3264149	3265087	939	b3118	tdcA	16131011	NP_417588.1		Cytoplasmic	CPR	0
2212	3615	3004.61	2806.36	0.934017	3268647	3269792	1146	b3124	garK	145698314	NP_417593.4		Cytoplasmic	CPR	0
1952	2448	3433.4	2460.86	0.716743	3269889	3270773	885	b3125	garR	145698315	NP_417594.3		Cytoplasmic	CPR	0
1327	1393	2679.19	1607.37	0.599946	3270809	3271579	771	b3126	garL	16131018	NP_417595.1		Cytoplasmic	CPR	0
1154	2687	1345.59	1790.63	1.33074	3271595	3272929	1335	b3127	garP	16131019	NP_417596.1	multipass		MPR	0
3418	7379	3384.6	4176.04	1.23384	3273304	3274875	1572	b3128	garD	16131020	NP_417597.1		Cytoplasmic	CPR	1
48	58	222.377	153.571	0.690587	3275024	3275359	336	b3129	prlF	16131021	NP_417598.1				0
90	233	301.285	445.782	1.4796	3275359	3275823	465	b3130	yhaV	16131022	NP_417599.1				0
80	219	153.742	240.535	1.56454	3275878	3276687	810	b3131	agaR	16131023	NP_417600.1		Cytoplasmic	CPR	1
5	12	20.7552	28.4688	1.37165	3278723	3279097	375	b3134	agaW	N/A	N/A	multipass		MPR	0
4	41	11.219	65.7219	5.85808	3279093	3279647	555	b3135	agaA	N/A	N/A				0
23	109	14.2243	38.5268	2.70851	3286836	3289352	2517	b3144	yraJ	16131036	NP_417613.1		Secreted		0
21	61	29.9354	49.6966	1.66013	3289363	3290454	1092	b3145	yraK	16131037	NP_417614.1				0
165	269	126.09	117.485	0.931751	3291422	3293458	2037	b3147	lpoA	16131039	NP_417616.1				1
39	86	153.305	193.207	1.26028	3293416	3293811	396	b3148	yraN	16131040	NP_417617.1				1
97	153	255.489	230.316	0.90147	3293831	3294421	591	b3149	diaA	16131041	NP_417618.1		Cytoplasmic	CPR	1
91	149	245.927	230.135	0.935786	3294431	3295006	576	b3150	yraP	16131042	NP_417619.1		Secreted		1
65	255	97.1964	217.926	2.24212	3295120	3296160	1041	b3151	yraQ	16131043	NP_417620.1	multipass		MPR	1
23	63	56.2935	88.1258	1.56547	3296233	3296868	636	b3152	yraR	90111547	NP_417621.2		Cytoplasmic	CPR	1
23	50	68.984	85.7081	1.24244	3296996	3297514	519	b3153	yhbO	90111548	NP_417622.2		Cytoplasmic	CPR	1
46	129	161.273	258.48	1.60274	3297494	3297937	444	b3154	yhbP	16131046	NP_417623.1				1
70	154	359.619	452.166	1.25734	3297988	3298290	303	b3155	yhbQ	16131047	NP_417624.1				1
624	1527	1927.27	2695.43	1.39858	3298277	3298780	504	b3156	yhbS	16131048	NP_417625.1		Cytoplasmic	CPR	0
873	2220	2588.47	3761.95	1.45335	3298774	3299298	525	b3157	yhbT	16131049	NP_417626.1				0
100	180	156.289	160.78	1.02874	3299507	3300502	996	b3158	yhbU	16131050	NP_417627.1		Cytoplasmic	CPR	0
77	112	136.361	113.357	0.831302	3300511	3301389	879	b3159	yhbV	90111549	NP_417628.2		Cytoplasmic	CPR	0
37	47	57.1385	41.4817	0.725985	3301470	3302477	1008	b3160	yhbW	16131052	NP_417629.1		Cytoplasmic	CPR	1
21	100	26.2565	71.4579	2.72153	3302595	3303839	1245	b3161	mtr	16131053	NP_417630.1	multipass		MPR	1
724	1167	596.3	549.324	0.921221	3303993	3305882	1890	b3162	deaD	90111550	NP_417631.2		Cytoplasmic	CPR	0
44	58	845.581	637.034	0.753368	3305875	3305955	81	b4685	yrbN	226524750	YP_002791258.1				0
1503	12025	2643.65	12088.2	4.57254	3306062	3306946	885	b3163	nlpI	16131055	NP_417632.1				1
1446	1739	1053.79	724.299	0.687326	3307055	3309190	2136	b3164	pnp	145698316	NP_417633.4		Cytoplasmic	CPR	1
110	287	634.186	945.665	1.49115	3309437	3309706	270	b3165	rpsO	16131057	NP_417634.1		Cytoplasmic	CPR	0
85	136	140.015	128.034	0.914433	3309855	3310799	945	b3166	truB	16131058	NP_417635.1		Cytoplasmic	CPR	0
38	45	147.145	99.5877	0.6768	3310799	3311200	402	b3167	rbfA	16131059	NP_417636.1		Cytoplasmic	CPR	0
1023	1206	595.75	401.391	0.673757	3311364	3314036	2673	b3168	infB	16131060	NP_417637.1		Cytoplasmic	CPR	0
536	750	560.725	448.413	0.799702	3314061	3315548	1488	b3169	nusA	16131061	NP_417638.1		Cytoplasmic	CPR	0
252	669	865.944	1313.85	1.51725	3315576	3316028	453	b3170	rimP	226524751	NP_417639.6		Cytoplasmic	CPR	0
78	117	90.3406	77.4472	0.85728	3316659	3318002	1344	b3172	argG	16131063	NP_417640.1		Cytoplasmic	CPR	1
701	1738	3276.89	4643.28	1.41698	3320195	3320527	333	b3175	secG	16131065	NP_417642.1	multipass		MPR	1
417	456	485.141	303.199	0.624972	3320755	3322092	1338	b3176	glmM	16131066	NP_417643.1		Cytoplasmic	CPR	0
64	49	117.344	51.3461	0.43757	3322085	3322933	849	b3177	folP	90111553	NP_417644.4		Cytoplasmic	CPR	0
561	1240	451.304	570.112	1.26325	3323023	3324957	1935	b3178	ftsH	16131068	NP_417645.1	multipass		MPR	0
248	987	612.772	1393.79	2.27456	3325057	3325686	630	b3179	rlmE	16131069	NP_417646.1		Cytoplasmic	CPR	0
90	301	476.522	910.833	1.91142	3325812	3326105	294	b3180	yhbY	16131070	NP_417647.1		Cytoplasmic	CPR	1
78	110	254.545	205.16	0.80599	3326261	3326737	477	b3181	greA	90111554	NP_417648.4		Cytoplasmic	CPR	1
29	67	31.4801	41.5667	1.32041	3326985	3328418	1434	b3182	dacB	16131072	NP_417649.1		Secreted		1
127	213	168.536	161.548	0.958534	3328604	3329776	1173	b3183	obgE	16131073	NP_417650.1		Cytoplasmic	CPR	0
82	338	132.137	311.286	2.35578	3329792	3330757	966	b3184	yhbE	16131074	NP_417651.1	multipass		MPR	0
285	525	1719.54	1810.34	1.0528	3330884	3331141	258	b3185	rpmA	16131075	NP_417652.1		Cytoplasmic	CPR	0
363	756	1811.09	2155.69	1.19027	3331162	3331473	312	b3186	rplU	16131076	NP_417653.1		Cytoplasmic	CPR	0
167	373	267.447	341.399	1.27651	3331732	3332703	972	b3187	ispB	16131077	NP_417654.1		Cytoplasmic	CPR	1
114	191	140.839	134.86	0.957547	3333257	3334516	1260	b3189	murA	16131079	NP_417656.1		Cytoplasmic	CPR	0
41	77	217.082	233.004	1.07334	3334985	3335278	294	b3191	mlaB	90111556	NP_417658.4				0
83	70	203.146	97.9175	0.482005	3335278	3335913	636	b3192	mlaC	16131082	NP_417659.1				0
59	98	166.38	157.945	0.949305	3335932	3336483	552	b3193	mlaD	16131083	NP_417660.1				0
101	235	200.792	267.009	1.32978	3336488	3337270	783	b3194	mlaE	16131084	NP_417661.1	multipass		MPR	0
139	542	267.127	595.297	2.22852	3337278	3338087	810	b3195	mlaF	16131085	NP_417662.1				0
66	226	105.049	205.584	1.95702	3338297	3339274	978	b3196	yrbG	16131086	NP_417663.1	multipass		MPR	0
142	290	223.954	261.397	1.16719	3339288	3340274	987	b3197	kdsD	16131087	NP_417664.1		Cytoplasmic	CPR	0
120	223	329.447	349.898	1.06208	3340295	3340861	567	b3198	kdsC	16131088	NP_417665.1		Cytoplasmic	CPR	0
59	46	159.447	71.0485	0.445592	3340858	3341433	576	b3199	lptC	16131089	NP_417666.1				0
90	69	251.071	110.011	0.438166	3341402	3341959	558	b3200	lptA	16131090	NP_417667.1				0
114	135	244.431	165.431	0.6768	3341966	3342691	726	b3201	lptB	16131091	NP_417668.1				0
413	492	448.321	305.236	0.680843	3342739	3344172	1434	b3202	rpoN	16131092	NP_417669.1		Cytoplasmic	CPR	0
83	96	448.615	296.55	0.661036	3344195	3344482	288	b3203	hpf	16131093	NP_417670.1		Cytoplasmic	CPR	0
89	124	281.587	224.221	0.796276	3344600	3345091	492	b3204	ptsN	16131094	NP_417671.1		Cytoplasmic	CPR	0
189	175	344.099	182.092	0.529185	3345137	3345991	855	b3205	rapZ	16131095	NP_417672.1				0
89	200	218.864	281.09	1.28432	3346474	3347106	633	b3207	yrbL	16131097	NP_417674.1		Cytoplasmic	CPR	1
96	403	204.989	491.809	2.39919	3347103	3347831	729	b3208	mtgA	16131098	NP_417675.1				0
163	589	387.969	801.23	2.06519	3347828	3348481	654	b3209	elbB	90111557	NP_417676.2		Cytoplasmic	CPR	0
352	616	234.462	234.499	1.00016	3348711	3351047	2337	b3210	arcB	49176326	YP_026207.1	multipass		MPR	1
23	64	38.4975	61.2233	1.59032	3351143	3352072	930	b3211	yhcC	16131101	NP_417678.1		Cytoplasmic	CPR	1
160	212	54.6908	41.4154	0.757264	3352654	3357207	4554	b3212	gltB	16131102	NP_417679.1				0
76	119	83.3717	74.6078	0.894881	3357220	3358638	1419	b3213	gltD	16131103	NP_417680.1		Cytoplasmic	CPR	0
16	55	10.456	20.5419	1.9646	3360829	3363210	2382	b3216	yhcD	16131106	NP_417683.1		Secreted		0
7	38	9.65999	29.9705	3.10254	3365849	3366976	1128	b3220	yhcG	16131110	NP_417687.1		Cytoplasmic	CPR	1
36	47	120.514	89.9217	0.746152	3367036	3367500	465	b3221	yhcH	16131111	NP_417688.1				0
37	81	83.4719	104.437	1.25117	3368369	3369058	690	b3223	nanE	16131113	NP_417690.1				0
108	260	112.754	155.137	1.37588	3369106	3370596	1491	b3224	nanT	90111559	NP_417691.4	multipass		MPR	0
103	91	179.344	90.5573	0.504935	3370705	3371598	894	b3225	nanA	16131115	NP_417692.1		Cytoplasmic	CPR	0
76	211	149.374	237.015	1.58672	3371720	3372511	792	b3226	nanR	49176329	NP_417693.3		Cytoplasmic	CPR	1
19	24	21.62	15.6079	0.72192	3372891	3374258	1368	b3227	dcuD	16131117	NP_417694.1	multipass		MPR	1
154	256	481.37	457.33	0.95006	3374301	3374798	498	b3228	sspB	16131118	NP_417695.1		Cytoplasmic	CPR	0
302	379	735.688	527.664	0.717239	3374804	3375442	639	b3229	sspA	16131119	NP_417696.1		Cytoplasmic	CPR	0
218	167	863.479	378.045	0.437816	3375837	3376229	393	b3230	rpsI	16131120	NP_417697.1		Cytoplasmic	CPR	0
244	384	885.361	796.33	0.899442	3376245	3376673	429	b3231	rplM	16131121	NP_417698.1		Cytoplasmic	CPR	0
28	173	38.64	136.445	3.53118	3376892	3378019	1128	b3232	yhcM	16131122	NP_417699.1		Cytoplasmic	CPR	1
213	501	830.987	1117.08	1.34428	3378213	3378611	399	b3233	yhcB	90111560	NP_417700.2				1
63	154	71.6873	100.151	1.39705	3378765	3380132	1368	b3234	degQ	16131124	NP_417701.1		Secreted		0
39	103	56.8435	85.7996	1.5094	3380222	3381289	1068	b3235	degS	16131125	NP_417702.1		Secreted		0
1955	3139	3240.92	2974.03	0.917648	3381352	3382290	939	b3236	mdh	16131126	NP_417703.1				1
38	101	125.589	190.774	1.51904	3382725	3383195	471	b3237	argR	16131127	NP_417704.1		Cytoplasmic	CPR	1
54	26	318.403	87.6171	0.275176	3383560	3383823	264	b3238	yhcN	90111561	NP_417705.2				1
7	37	39.9138	120.575	3.02089	3383879	3384151	273	b3239	yhcO	16131129	NP_417706.1				1
21	82	16.6105	37.0688	2.23165	3384243	3386210	1968	b3240	aaeB	16131130	NP_417707.1	multipass		MPR	0
20	34	33.3685	32.4203	0.971585	3386216	3387148	933	b3241	aaeA	16131131	NP_417708.1				0
65	108	108.797	103.314	0.949603	3387542	3388471	930	b3243	aaeR	16131133	NP_417710.1		Cytoplasmic	CPR	1
217	408	233.603	251.022	1.07456	3388605	3390050	1446	b3244	tldD	16131134	NP_417711.1		Cytoplasmic	CPR	1
124	302	50.7822	70.6852	1.39193	3390480	3394280	3801	b4472	yhdP	49176330	YP_026208.1				1
128	337	135.544	203.954	1.50471	3394348	3395817	1470	b3247	rng	90111563	NP_417713.2		Cytoplasmic	CPR	1
96	235	251.578	351.966	1.39903	3395807	3396400	594	b3248	yhdE	16131136	NP_417714.1		Cytoplasmic	CPR	1
47	132	149.616	240.151	1.60512	3396409	3396897	489	b3249	mreD	16131137	NP_417715.1	multipass		MPR	0
82	215	115.62	173.256	1.4985	3396897	3398000	1104	b3250	mreC	16131138	NP_417716.1				0
195	355	290.751	302.515	1.04046	3398066	3399109	1044	b3251	mreB	90111564	NP_417717.2		Cytoplasmic	CPR	0
124	412	99.4452	188.839	1.89892	3399414	3401354	1941	b3252	csrD	16131140	NP_417718.1	multipass		MPR	1
265	709	423.086	646.936	1.52909	3401506	3402480	975	b3253	yhdH	16131141	NP_417719.1				0
4	12	64.8599	111.206	1.71456	3402660	3402755	96	b4646	N/A	N/A	N/A				0
51	42	168.553	79.3319	0.470664	3403458	3403928	471	b3255	accB	16131143	NP_417721.1		Cytoplasmic	CPR	0
70	101	80.7146	66.559	0.824622	3403939	3405288	1350	b3256	accC	16131144	NP_417722.1		Cytoplasmic	CPR	0
26	40	27.8737	24.5083	0.879262	3405629	3407080	1452	b3258	panF	90111565	NP_417724.4	multipass		MPR	0
28	50	49.4171	50.4337	1.02057	3407092	3407973	882	b3259	prmA	16131147	NP_417725.1		Cytoplasmic	CPR	0
144	258	232.045	237.608	1.02397	3408302	3409267	966	b3260	dusB	16131148	NP_417726.1		Cytoplasmic	CPR	0
21	39	110.065	116.823	1.06139	3409293	3409589	297	b3261	fis	16131149	NP_417727.1		Cytoplasmic	CPR	0
23	89	11.5307	25.5004	2.21154	3413055	3416159	3105	b3266	acrF	16131154	NP_417732.1	multipass		MPR	0
6	35	12.3054	41.0247	3.33387	3420458	3421216	759	b3271	yhdZ	16131159	NP_417737.1				0
133	253	373.032	405.552	1.08718	3427258	3427812	555	b3279	yrdA	90111568	NP_417738.4		Cytoplasmic	CPR	1
32	81	193.071	279.309	1.44666	3427788	3428045	258	b3280	yrdB	16131161	NP_417739.1				0
135	209	256.589	227.029	0.884798	3428042	3428860	819	b3281	aroE	16131162	NP_417740.1		Cytoplasmic	CPR	0
77	143	209.182	222.024	1.06139	3428865	3429437	573	b3282	tsaC	16131163	NP_417741.1				0
284	585	814.153	958.463	1.17725	3429442	3429984	543	b3283	yrdD	49176335	YP_026210.1		Cytoplasmic	CPR	0
498	1587	1635.46	2978.64	1.82129	3430013	3430486	474	b3284	smg	16131165	NP_417743.1		Cytoplasmic	CPR	1
86	331	118.996	261.755	2.19969	3430458	3431582	1125	b4473	smf	49176336	YP_026211.1		Cytoplasmic	CPR	1
165	399	503.618	696.021	1.38204	3431712	3432221	510	b3287	def	16131166	NP_417745.1		Cytoplasmic	CPR	0
212	501	348.109	470.163	1.35062	3432236	3433183	948	b3288	fmt	16131167	NP_417746.1		Cytoplasmic	CPR	0
66	109	79.642	75.172	0.943874	3433229	3434518	1290	b3289	rsmB	16131168	NP_417747.1		Cytoplasmic	CPR	1
51	173	57.6533	111.772	1.93869	3434540	3435916	1377	b3290	trkA	16131169	NP_417748.1				1
124	348	469.643	753.281	1.60394	3436046	3436456	411	b3291	mscL	16131170	NP_417749.1	multipass		MPR	1
4	22	28.4317	89.3713	3.14336	3436453	3436671	219	b4550	arfA	94541124	YP_588467.1				1
24	35	87.6979	73.0933	0.833467	3436727	3437152	426	b3292	zntR	16131171	NP_417751.1		Cytoplasmic	CPR	0
296	303	1199.91	701.99	0.585036	3437638	3438021	384	b3294	rplQ	16131173	NP_417753.1		Cytoplasmic	CPR	0
1745	2304	2743.77	2070.46	0.754603	3438062	3439051	990	b3295	rpoA	16131174	NP_417754.1		Cytoplasmic	CPR	0
[truncated: 732 more rows]
